# Supplementary material for: Integrative Omics reveals genetic basis and TaMYB7-A1’s function in wheat WUE and drought resilience
Source: Research Square preprint supplement (doi:10.21203/rs.3.rs-5501419/v1), 2024-12-22
Supplement: Supplementary file 1 [file 43fcd2f837bd6fe3c5a82647.xlsx]

## Sheet: Supplemental Table 1
Supplemental Table 1. The wheat accessions in GWAS panel and population-transcriptome sequencing
ID	Accession name	Sub-group	GWAS_ID	Core accession
M001	Yumai13	Sub-group2	XJ.GWAS_001
M002	Yumai18	Sub-group2	XJ.GWAS_002	R091
M003	Yumai47	Sub-group2	XJ.GWAS_003	R092
M004	Jinan13	Sub-group2	XJ.GWAS_004
M005	Xifeng20	Sub-group2	XJ.GWAS_005
M006	Heng5299	Sub-group3	XJ.GWAS_006
M007	Dali52	Sub-group3	XJ.GWAS_007
M008	Fengshan1	Sub-group2	XJ.GWAS_008	R105
M009	Fengchan3	Sub-group2	XJ.GWAS_009
M010	Huaishu10	Sub-group2	XJ.GWAS_011
M011	Jinmai16	Sub-group2	XJ.GWAS_012	R106
M012	Jinmai17	Sub-group2	XJ.GWAS_018
M013	Jinmai11	Sub-group2	XJ.GWAS_021
M014	Jinmai53	Sub-group2	XJ.GWAS_023
M015	Taiyuan566	Sub-group2	XJ.GWAS_029
M016	Yunhan719	Sub-group2	XJ.GWAS_032
M017	Shijiazhuang8	Sub-group3	XJ.GWAS_037	R018
M018	Chang4738	Sub-group3	XJ.GWAS_038	R020
M019	Shimai19	Sub-group3	XJ.GWAS_039	R027
M020	Luohan7	Sub-group3	XJ.GWAS_040	R039
M021	Luohan2	Sub-group3	XJ.GWAS_041
M022	Aikang58	Sub-group3	XJ.GWAS_042	R047
M023	Shimai18	Sub-group3	XJ.GWAS_043
M024	Jinan2	Sub-group3	XJ.GWAS_045
M025	Luohan11	Sub-group3	XJ.GWAS_046
M026	Luohan9	Sub-group3	XJ.GWAS_047
M027	Jinmai24	Sub-group3	XJ.GWAS_048	R099
M028	Luomai21	Sub-group3	XJ.GWAS_053
M029	Zhoumai24	Sub-group3	XJ.GWAS_054
M030	Kenong2011	Sub-group3	XJ.GWAS_055
M031	Mingxian169	Sub-group3	XJ.GWAS_057	R104
M032	Jinmai37	Sub-group3	XJ.GWAS_059
M033	Shiluan02-1	Sub-group3	XJ.GWAS_061	R100
M034	Luohan6	Sub-group2	XJ.GWAS_062	R038
M035	Jinmai47	Sub-group3	XJ.GWAS_063	R037
M036	Hanxuan10	Sub-group3	XJ.GWAS_065	R101
M037	Lumai1	Sub-group2	XJ.GWAS_068	R107
M038	Xingmai7	Sub-group3	XJ.GWAS_071
M039	Shimai22	Sub-group3	XJ.GWAS_072	R055
M040	Han00-7086	Sub-group3	XJ.GWAS_073
M041	Hannong1412	Sub-group3	XJ.GWAS_076	R021
M042	Henong6331	Sub-group3	XJ.GWAS_077
M043	Jimai403	Sub-group3	XJ.GWAS_078
M044	Fengkang2	Sub-group3	XJ.GWAS_079	R110
M045	Nongda311	Sub-group3	XJ.GWAS_081	R103
M046	Fuzhuang30	Sub-group3	XJ.GWAS_082	R096
M047	Lunxuan987	Sub-group3	XJ.GWAS_084
M048	Yannong15	Sub-group3	XJ.GWAS_085	R049
M049	Cangmai6005	Sub-group3	XJ.GWAS_086	R019
M050	Xiaoyan22	Sub-group3	XJ.GWAS_087	R042
M051	Zhongmai12	Sub-group3	XJ.GWAS_088
M052	Liangxing99	Sub-group3	XJ.GWAS_089	R010
M053	Shi4185	Sub-group3	XJ.GWAS_090	R063
M054	Zhongmai175	Sub-group3	XJ.GWAS_091	R035
M055	Kenong199	Sub-group3	XJ.GWAS_092	R017
M056	Kenong9204	Sub-group3	XJ.GWAS_093	R048
M057	Heng7228	Sub-group3	XJ.GWAS_094	R071
M058	Baomai9	Sub-group3	XJ.GWAS_095	R066
M059	Nongda399	Sub-group3	XJ.GWAS_096
M060	Han4589	Sub-group3	XJ.GWAS_097
M061	Henong6049	Sub-group3	XJ.GWAS_098	R070
M062	Nongda5181	Sub-group3	XJ.GWAS_099
M063	Bima4	Sub-group3	XJ.GWAS_100
M064	Bima1	Sub-group3	XJ.GWAS_101	R067
M065	Yaomai16	Sub-group3	XJ.GWAS_102	R036
M066	Xingmai6	Sub-group3	XJ.GWAS_103
M067	Heng4399	Sub-group3	XJ.GWAS_104	R046
M068	Han08-6012	Sub-group3	XJ.GWAS_105
M069	Hanmai13	Sub-group3	XJ.GWAS_106
M070	Xingmai4	Sub-group3	XJ.GWAS_107	R089
M071	Linhan8	Sub-group3	XJ.GWAS_108
M072	Linyou7287	Sub-group3	XJ.GWAS_109	R076
M073	Heng136	Sub-group3	XJ.GWAS_110
M074	Han4564	Sub-group3	XJ.GWAS_112
M075	Jinhe9123	Sub-group3	XJ.GWAS_113
M076	Henong825	Sub-group3	XJ.GWAS_114	R024
M077	Chang6359	Sub-group3	XJ.GWAS_115
M078	Yunhan22-33	Sub-group3	XJ.GWAS_116
M079	Chang4640	Sub-group3	XJ.GWAS_117
M080	Chang6878	Sub-group3	XJ.GWAS_118	R011
M081	Jintai170	Sub-group3	XJ.GWAS_119	R075
M082	Luyuan502	Sub-group3	XJ.GWAS_120	R060
M083	Jinmai79	Sub-group3	XJ.GWAS_121
M084	Linhan6	Sub-group3	XJ.GWAS_122
M085	Tai10604	Sub-group3	XJ.GWAS_123	R085
M086	Yunhan618	Sub-group3	XJ.GWAS_124	R093
M087	Shunmai1718	Sub-group3	XJ.GWAS_125	R084
M088	Xinong928	Sub-group3	XJ.GWAS_126	R087
M089	Xinong556	Sub-group3	XJ.GWAS_127
M090	Xinong538	Sub-group3	XJ.GWAS_128	R025
M091	Zhengmai9023	Sub-group2	XJ.GWAS_129	R001
M092	Xinong558	Sub-group3	XJ.GWAS_130
M093	Shannong7859	Sub-group3	XJ.GWAS_131	R083
M094	Aifeng3	Sub-group3	XJ.GWAS_132	R064
M095	Baomai10	Sub-group1	XJ.GWAS_133
M096	Heng0628	Sub-group1	XJ.GWAS_134
M097	Jimai585	Sub-group1	XJ.GWAS_135	R003
M098	Jimai22	Sub-group1	XJ.GWAS_136	R062
M099	Bainong3217	Sub-group2	XJ.GWAS_140	R065
M100	Shan225	Sub-group2	XJ.GWAS_144	R081
M101	Zhengmai0856	Sub-group2	XJ.GWAS_149
M102	Pingan8	Sub-group1	XJ.GWAS_151
M103	Jinmai45	Sub-group2	XJ.GWAS_155	R098
M104	Han6172	Sub-group3	XJ.GWAS_158	R050
M105	Shannong17	Sub-group3	XJ.GWAS_167
M106	Lumai5	Sub-group2	XJ.GWAS_168
M107	Lumai13	Sub-group3	XJ.GWAS_173	R078
M108	Jingdong8	Sub-group2	XJ.GWAS_177	R102
M109	Shan229	Sub-group2	XJ.GWAS_178
M110	Zhoumai18	Sub-group2	XJ.GWAS_189	R028
M111	Xiaoyan6	Sub-group2	XJ.GWAS_193	R088
M112	Jinmai32	Sub-group3	XJ.GWAS_194
M113	Hengguan35	Sub-group2	XJ.GWAS_205
M114	Lankaoaizao8	Sub-group2	XJ.GWAS_208	R108
M115	Xiaoyan81	Sub-group2	XJ.GWAS_219	R059
M116	Xiaoyan926	Sub-group2	XJ.GWAS_239
M117	Xinong979	Sub-group2	XJ.GWAS_257	R041
M118	Xuke718	Sub-group2	XJ.GWAS_262
M119	Zhengmai366	Sub-group2	XJ.GWAS_268	R109
M120	Jing411	Sub-group3	XJ.GWAS_275	R022
M121	Keyi26	Sub-group3	XJ.GWAS_287
M122	Shixin733	Sub-group2	XJ.GWAS_294
M123	Jinmai41	Sub-group2	XJ.GWAS_296
M124	Shixin828	Sub-group2	XJ.GWAS_297
M125	Shan253	Sub-group2	XJ.GWAS_301	R082
M126	Neixiang5	Sub-group3	XJ.GWAS_306	R097
M127	Xiaoyan60	Sub-group2	XJ.GWAS_307	R033
M128	Pingliang38	Sub-group2	XJ.GWAS_309
M129	Linfen7410	Sub-group2	XJ.GWAS_311
M130	Lumai23	Sub-group2	XJ.GWAS_313
M131	Yumai51	Sub-group2	XJ.GWAS_315
M132	Wenmai8	Sub-group2	XJ.GWAS_317
M133	Lumai14	Sub-group3	XJ.GWAS_320
M134	Shimai15	Sub-group3	XJ.GWAS_334
M135	Cangmai6001	Sub-group3	XJ.GWAS_340
M136	Luofulin10	Sub-group2	XJ.GWAS_342	R095
M137	Jimai38	Sub-group2	XJ.GWAS_343
M138	Heng0816	Sub-group1	XJ.GWAS_353	R002
M139	Henong7106	Sub-group1	XJ.GWAS_354	R004
M140	Xinong1505	Sub-group1	XJ.GWAS_355
M141	Hengke6021	Sub-group1	XJ.GWAS_356
M142	Heng5366	Sub-group1	XJ.GWAS_357
M143	Heng9966	Sub-group1	XJ.GWAS_358
M144	Yangmai158	Sub-group1	XJ.GWAS_359	R005
M145	Wanmai52	Sub-group1	XJ.GWAS_360
M146	Jimai7369	Sub-group1	XJ.GWAS_361	R006
M147	Hanmai17	Sub-group1	XJ.GWAS_362	R007
M148	Zhongmai1062	Sub-group1	XJ.GWAS_363	R008
M149	Dunmai127	Sub-group1	XJ.GWAS_364	R009
M150	Zhongxinmai78	Sub-group1	XJ.GWAS_366	R012
M151	Zhoumai28	Sub-group1	XJ.GWAS_368
M152	Lunxuan169	Sub-group1	XJ.GWAS_369	R013
M153	Heng444	Sub-group1	XJ.GWAS_370	R014
M154	Hanmai15	Sub-group1	XJ.GWAS_371	R015
M155	Xinong225	Sub-group1	XJ.GWAS_372	R016
M156	Heng1589	Sub-group1	XJ.GWAS_373
M157	Xinong3517	Sub-group1	XJ.GWAS_374
M158	Xingmai13	Sub-group1	XJ.GWAS_375
M159	Jimai867	Sub-group1	XJ.GWAS_377	R023
M160	Luohan13	Sub-group1	XJ.GWAS_378
M161	Henong827	Sub-group1	XJ.GWAS_379
M162	Wankenmai1	Sub-group1	XJ.GWAS_380	R026
M163	Pubing151	Sub-group1	XJ.GWAS_381
M164	Heng6632	Sub-group1	XJ.GWAS_382	R029
M165	Heng5835	Sub-group1	XJ.GWAS_383	R030
M166	Cangmai14	Sub-group1	XJ.GWAS_384	R031
M167	Shimai25	Sub-group1	XJ.GWAS_385
M168	Xinong511	Sub-group1	XJ.GWAS_386	R032
M169	Jimai418	Sub-group1	XJ.GWAS_387
M170	Jimai181	Sub-group1	XJ.GWAS_388
M171	Ningmai13	Sub-group1	XJ.GWAS_389
M172	Shixin633	Sub-group1	XJ.GWAS_390	R034
M173	Shanmai139	Sub-group1	XJ.GWAS_391
M174	Xinong20	Sub-group1	XJ.GWAS_392
M175	Xinong1018	Sub-group1	XJ.GWAS_394
M176	Xiaoyan269	Sub-group1	XJ.GWAS_395
M177	Jimai518	Sub-group1	XJ.GWAS_396	R040
M178	Yingbo700	Sub-group1	XJ.GWAS_397
M179	Jimai120	Sub-group1	XJ.GWAS_398
M180	Suyu1205	Sub-group1	XJ.GWAS_399	R043
M181	Zhongwomai2	Sub-group1	XJ.GWAS_400
M182	Shimai28	Sub-group1	XJ.GWAS_401
M183	Hanmai19	Sub-group1	XJ.GWAS_402
M184	Shinong952	Sub-group1	XJ.GWAS_403	R044
M185	Jimai5265	Sub-group1	XJ.GWAS_404	R045
M186	Hengguan11-6021	Sub-group1	XJ.GWAS_405
M187	Henong826	Sub-group1	XJ.GWAS_406
M188	Zhongxinmai99	Sub-group1	XJ.GWAS_407
M189	Zhongxinmai9	Sub-group1	XJ.GWAS_408
M190	Yannong1458	Sub-group1	XJ.GWAS_409
M191	Pubing9946	Sub-group1	XJ.GWAS_410	R051
M192	Xinong1012	Sub-group1	XJ.GWAS_411
M193	Jinmai98	Sub-group1	XJ.GWAS_412
M194	Jimai325	Sub-group1	XJ.GWAS_413	R052
M195	Longyu8	Sub-group1	XJ.GWAS_414	R053
M196	Kenong8162	Sub-group1	XJ.GWAS_415
M197	Shinong956	Sub-group1	XJ.GWAS_416	R054
M198	Zhongxinmai28	Sub-group1	XJ.GWAS_417	R056
M199	Zhongxinmai15	Sub-group1	XJ.GWAS_418	R057
M200	Jimai738	Sub-group1	XJ.GWAS_419	R058
M201	Kenong1223	Sub-group1	XJ.GWAS_420	R061
M202	Kenong1002	Sub-group1	XJ.GWAS_421
M203	Baofeng104	Sub-group1	XJ.GWAS_422
M204	Dekang6756	Sub-group1	XJ.GWAS_423	R068
M205	Een6	Sub-group1	XJ.GWAS_424
M206	Luohan8	Sub-group1	XJ.GWAS_425	R080
M207	Hanmai14	Sub-group1	XJ.GWAS_426
M208	Hanmai4	Sub-group1	XJ.GWAS_427	R069
M209	Hanmai7	Sub-group1	XJ.GWAS_428
M210	Henong7069	Sub-group1	XJ.GWAS_429
M211	HengS13-5022	Sub-group1	XJ.GWAS_430	R072
M212	Jimai161	Sub-group1	XJ.GWAS_431	R073
M213	Jimai36	Sub-group1	XJ.GWAS_432
M214	Jimai631	Sub-group1	XJ.GWAS_433
M215	Jinmai85	Sub-group1	XJ.GWAS_434
M216	Jinmai86	Sub-group1	XJ.GWAS_435	R074
M217	Jinmai91	Sub-group1	XJ.GWAS_436
M218	Jinmai92	Sub-group1	XJ.GWAS_437
M219	Longjian301	Sub-group1	XJ.GWAS_438	R077
M220	Longjian386	Sub-group1	XJ.GWAS_439
M221	Luohan10	Sub-group1	XJ.GWAS_440
M222	Luohan12	Sub-group1	XJ.GWAS_441	R079
M223	Neimai8	Sub-group1	XJ.GWAS_442
M224	Xifeng27	Sub-group1	XJ.GWAS_443	R086
M225	Xifeng28	Sub-group1	XJ.GWAS_444
M226	Xinong219	Sub-group1	XJ.GWAS_445
M227	Yanzhan4110	Sub-group1	XJ.GWAS_446	R090
M228	Zhongmai155	Sub-group1	XJ.GWAS_448	R094

## Sheet: Supplemental Table 2
Supplemental Table 2. Identified QTLs for WUE-related traits in the GWAS
Trait	Water condition	Type	QTL name		Peak SNP				P-value	-log10 (P-value)	PVE (%)
					Name	chr	Position (bp)
WUEp	DS1/WW	Conditional QTL	qWUEp.1A.1		AX-94708607	chr1A	155080790		2.7013e-06	5.56843	9.26141
WUEp	DS1/WW	Conditional QTL	qWUEp.1B.2		AX-108832578	chr1B	345407092		1.37918e-06	5.86038	9.74085
WUEp	DS2/WW	Conditional QTL	qWUEp.1D.3		AX-111475929	chr1D	10404642		0.000125812	3.90028	6.32969
WUEp	WW	Stable QTL	qWUEp.2A.4		AX-109946724	chr2A	4217293		2.67355e-06	5.57291	9.47657
WUEp	DS1/WW	Conditional QTL	qWUEp.2A.5		AX-94594367	chr2A	16551885		3.63726e-06	5.43923	9.17104
WUEp	DS1	Stable QTL	qWUEp.2A.6		AX-111576810	chr2A	50432559		1.36412e-05	4.86515	8.01255
WUEp	WW	Stable QTL	qWUEp.2A.7		AX-110692233	chr2A	708001477		3.41559e-07	6.46653	10.877
WUEp	DS2	Stable QTL	qWUEp.2A.8		AX-109938583	chr2A	758559403		3.81617e-05	4.41837	7.34974
WUEp	DS2	Stable QTL	qWUEp.2B.9		AX-110908769	chr2B	17529359		0.000103784	3.98387	6.52819
WUEp	DS1/WW	Conditional QTL	qWUEp.2B.10		AX-110088095	chr2B	28427803		7.30509e-05	4.13637	6.66275
WUEp	DS1	Stable QTL	qWUEp.2B.11		AX-95173053	chr2B	683754863		1.59289e-07	6.79781	11.4972
WUEp	WW	Stable QTL	qWUEp.2B.12		AX-95129431	chr2B	767016896		2.24039e-05	4.64968	7.57312
WUEp	DS1/WW	Conditional QTL	qWUEp.2B.13		AX-111495158	chr2B	787924051		9.0247e-05	4.04457	6.59551
WUEp	DS1/WW	Conditional QTL	qWUEp.2D.14		AX-111516041	chr2D	19016331		7.51685e-05	4.12396	6.72237
WUEp	DS1	Stable QTL	qWUEp.2D.15		AX-94664024	chr2D	47419253		0.000139466	3.85553	6.33123
WUEp	DS1	Stable QTL	qWUEp.2D.16		AX-94667987	chr2D	571880145		9.22664e-06	5.03496	8.3659
WUEp	DS1	Stable QTL	qWUEp.2D.17		AX-94878557	chr2D	624553417		4.85808e-06	5.31354	8.85371
WUEp	DS2/DS1	Conditional QTL	qWUEp.3A.18		AX-111582131	chr3A	9626258		2.6743e-05	4.57279	7.72041
WUEp	DS1	Stable QTL	qWUEp.3A.19		AX-108829349	chr3A	95900329		0.000218179	3.66119	5.79202
WUEp	DS1	Stable QTL	qWUEp.3A.20		AX-111495865	chr3A	136434472		4.57439e-06	5.33967	8.7704
WUEp	WW	Stable QTL	qWUEp.3A.21		AX-109972641	chr3A	438639490		2.6393e-08	7.57851	12.776
WUEp	WW	Stable QTL	qWUEp.3A.22		AX-109627023	chr3A	447619711		4.06058e-07	6.39141	10.6583
WUEp	DS2	Stable QTL	qWUEp.3A.23		AX-110447030	chr3A	507455106		2.19412e-05	4.65874	7.77507
WUEp	DS1	Stable QTL	qWUEp.3A.24		AX-109362685	chr3A	532584829		2.45984e-07	6.60909	11.1654
WUEp	WW	Stable QTL	qWUEp.3A.25		AX-108825858	chr3A	569665716		6.31758e-05	4.19945	6.83574
WUEp	WW	Stable QTL	qWUEp.3A.26		AX-109817347	chr3A	715356820		0.000104265	3.98186	6.40342
WUEp	DS1	Stable QTL	qWUEp.3B.27		AX-111692690	chr3B	621968		2.96196e-05	4.52842	7.35207
WUEp	WW	Stable QTL	qWUEp.3B.28		AX-111518008	chr3B	132650782		9.56271e-05	4.01942	6.47324
WUEp	DS1	Stable QTL	qWUEp.3B.29		AX-109383393	chr3B	147813319		0.000104876	3.97932	6.50404
WUEp	DS2	Stable QTL	qWUEp.3B.30		AX-109886961	chr3B	204631084		0.000144048	3.84149	6.15258
WUEp	DS2	Stable QTL	qWUEp.3B.31		AX-111093742	chr3B	223514828		0.000129162	3.88886	6.50751
WUEp	WW	Stable QTL	qWUEp.3B.32		AX-109374976	chr3B	275837352		0.000133759	3.87368	6.44921
WUEp	DS2/DS1	Conditional QTL	qWUEp.3D.33		AX-94498901	chr3D	603418504		4.38071e-05	4.35846	7.35472
WUEp	DS2/DS1	Conditional QTL	qWUEp.4A.34		AX-110598588	chr4A	37794261		1.02262e-05	4.99029	8.19812
WUEp	DS2/DS1	Conditional QTL	qWUEp.4A.35		AX-110599039	chr4A	615910181		0.000138925	3.85722	6.23644
WUEp	DS2/WW	Conditional QTL	qWUEp.4A.36		AX-111169431	chr4A	639026636		0.000188081	3.72566	6.08746
WUEp	DS2/WW	Conditional QTL	qWUEp.4A.37		AX-111504000	chr4A	699090820		6.83913e-06	5.165	8.79385
WUEp	WW	Stable QTL	qWUEp.4B.38		AX-109410874	chr4B	13983627		2.79904e-06	5.55299	9.28949
WUEp	DS2	Stable QTL	qWUEp.4B.39		AX-94674646	chr4B	636779274		0.000215829	3.66589	5.94831
WUEp	DS1/WW	Conditional QTL	qWUEp.5A.40		AX-94877472	chr5A	331865592		9.90862e-06	5.00399	8.32257
WUEp	DS1/WW	Conditional QTL	qWUEp.5A.41		AX-111544902	chr5A	482521440		0.000129497	3.88774	6.2026
WUEp	DS2	Stable QTL	qWUEp.5A.42		AX-109999168	chr5A	533280055		5.9079e-05	4.22857	6.80442
WUEp	DS2	Stable QTL	qWUEp.5A.43		AX-109305035	chr5A	702711507		3.14028e-05	4.50303	7.35176
WUEp	DS1	Stable QTL	qWUEp.5B.44		AX-111104031	chr5B	314283047		8.40991e-06	5.07521	8.49467
WUEp	DS2	Stable QTL	qWUEp.5B.45		AX-110400764	chr5B	539020493		0.000246938	3.60741	5.79292
WUEp	DS1	Stable QTL	qWUEp.5B.46		AX-108855137	chr5B	548078901		0.000166987	3.77732	6.25448
WUEp	DS1	Stable QTL	qWUEp.5B.47		AX-110980727	chr5B	584859573		8.35791e-06	5.0779	8.44295
WUEp	WW	Stable QTL	qWUEp.5D.48		AX-110315541	chr5D	85517962		0.000180588	3.74331	6.12615
WUEp	DS1/WW	Conditional QTL	qWUEp.5D.49		AX-110777538	chr5D	485909036		7.10014e-05	4.14873	6.72276
WUEp	DS1/WW	Conditional QTL	qWUEp.6A.50		AX-109299380	chr6A	31350622		2.21882e-05	4.65388	7.66021
WUEp	DS1/WW	Conditional QTL	qWUEp.6A.51		AX-110564934	chr6A	181438216		6.29503e-05	4.201	6.77853
WUEp	DS2/WW	Conditional QTL	qWUEp.6A.52		AX-94571198	chr6A	603136597		3.09638e-05	4.50915	7.34752
WUEp	DS2/WW	Conditional QTL	qWUEp.6B.53		AX-110412450	chr6B	149979708		0.000154656	3.81063	6.3524
WUEp	DS1	Stable QTL	qWUEp.6D.54		AX-94705135	chr6D	2404064		0.000169572	3.77065	6.36271
WUEp	DS1/WW	Conditional QTL	qWUEp.6D.55		AX-111688175	chr6D	469165168		1.39979e-05	4.85394	7.98734
WUEp	WW	Stable QTL	qWUEp.7A.56		AX-109302624	chr7A	12231281		0.000101279	3.99448	6.44007
WUEp	DS2/WW	Conditional QTL	qWUEp.7A.57		AX-110543836	chr7A	254907778		0.000183213	3.73704	5.93559
WUEp	DS2/WW	Conditional QTL	qWUEp.7A.58		AX-94453035	chr7A	281374161		2.4113e-05	4.61775	7.72408
WUEp	DS1	Stable QTL	qWUEp.7A.59		AX-108800980	chr7A	627873347		1.80298e-06	5.74401	9.93499
WUEp	DS2/WW	Conditional QTL	qWUEp.7A.60		AX-111802545	chr7A	655938160		3.23373e-05	4.4903	7.36878
WUEp	DS1/WW	Conditional QTL	qWUEp.7A.61		AX-111644100	chr7A	677852056		4.09413e-05	4.38784	7.28978
WUEp	DS1/WW	Conditional QTL	qWUEp.7A.62		AX-109471379	chr7A	708881716		7.49216e-05	4.12539	6.74213
WUEp	DS2/DS1	Conditional QTL	qWUEp.7A.63		AX-111475141	chr7A	725806701		0.000308909	3.51017	5.63792
WUEp	WW	Stable QTL	qWUEp.7D.64		AX-109329206	chr7D	15220993		0.000255778	3.59214	5.78941
WUEp	DS2/WW	Conditional QTL	qWUEp.7D.65		AX-110888456	chr7D	41407631		7.32363e-06	5.13527	8.56258
WUEp	DS2/WW	Conditional QTL	qWUEp.7D.66		AX-95631997	chr7D	426730091		5.5356e-06	5.25684	8.74587
DW.S	DS1	Stable QTL	qDW.S.1A.1		AX-108959923	chr1A	20972564		1.87965e-06	5.72592	9.65838
DW.S	DS2/DS1	Conditional QTL	qDW.S.1A.2		AX-110504666	chr1A	548564414		4.71832e-05	4.32621	7.09416
DW.S	DS2/DS1	Conditional QTL	qDW.S.1A.3		AX-110531273	chr1A	584074554		1.94255e-05	4.71163	7.7578
DW.S	DS2	Stable QTL	qDW.S.1B.4		AX-94643427	chr1B	45252636		1.21193e-06	5.91652	9.82284
DW.S	DS1/WW	Conditional QTL	qDW.S.1B.5		AX-109621209	chr1B	217554374		0.000229128	3.63992	6.03409
DW.S	DS1/WW	Conditional QTL	qDW.S.1B.6		AX-109840997	chr1B	347558393		1.8191e-05	4.74014	7.75555
DW.S	DS2/WW	Conditional QTL	qDW.S.1B.7		AX-109533582	chr1B	658737240		2.41259e-06	5.61752	9.36514
DW.S	DS2	Stable QTL	qDW.S.1D.8		AX-94698368	chr1D	28166676		1.85747e-06	5.73108	9.61039
DW.S	DS1	Stable QTL	qDW.S.1D.9		AX-94386868	chr1D	144201707		2.40832e-05	4.61829	7.74351
DW.S	WW	Stable QTL	qDW.S.1D.10		AX-109699521	chr1D	300941845		9.26486e-05	4.03316	6.6009
DW.S	DS2/DS1	Conditional QTL	qDW.S.1D.11		AX-94584111	chr1D	427153536		0.000219604	3.65836	6.11523
DW.S	DS2	Stable QTL	qDW.S.2A.12		AX-110029733	chr2A	48850873		0.000121964	3.91377	6.31914
DW.S	WW	Stable QTL	qDW.S.2A.13		AX-94860645	chr2A	727241615		9.65419e-05	4.01528	6.54119
DW.S	DS1/WW	Conditional QTL	qDW.S.2A.14		AX-108812186	chr2A	750775620		0.000102055	3.99117	6.4155
DW.S	DS2	Stable QTL	qDW.S.2A.15		AX-109961363	chr2A	776145587		2.98612e-05	4.52489	7.41827
DW.S	DS1	Stable QTL	qDW.S.2B.16		AX-110437746	chr2B	79243832		7.21578e-05	4.14172	6.75728
DW.S	WW	Stable QTL	qDW.S.2B.17		AX-111517629	chr2B	716772469		4.85029e-06	5.31423	9.46062
DW.S	DS1/WW	Conditional QTL	qDW.S.2B.18		AX-94392431	chr2B	749043931		0.000108177	3.96587	6.34421
DW.S	DS1/WW	Conditional QTL	qDW.S.2B.19		AX-110431820	chr2B	789604421		4.19237e-05	4.37754	7.37115
DW.S	DS1/WW	Conditional QTL	qDW.S.3A.20		AX-111750346	chr3A	9573755		4.49629e-05	4.34715	7.04771
DW.S	DS1	Stable QTL	qDW.S.3A.21		AX-111035791	chr3A	42453972		0.000169312	3.77131	6.0204
DW.S	DS2/DS1	Conditional QTL	qDW.S.3A.22		AX-109436443	chr3A	67351525		2.00902e-06	5.69701	9.55644
DW.S	DS1	Stable QTL	qDW.S.3A.23		AX-111122469	chr3A	539327131		6.06489e-05	4.21718	6.81911
DW.S	DS2	Stable QTL	qDW.S.3A.24		AX-94684776	chr3A	674753256		8.87983e-05	4.0516	6.74893
DW.S	DS1/WW	Conditional QTL	qDW.S.3B.25		AX-94824250	chr3B	6680255		5.06952e-05	4.29503	7.31649
DW.S	DS2/DS1	Conditional QTL	qDW.S.3B.26		AX-110475539	chr3B	222824870		0.000113031	3.9468	6.46169
DW.S	DS1	Stable QTL	qDW.S.3B.27		AX-110529843	chr3B	277451985		0.000207137	3.68374	6.02969
DW.S	DS1	Stable QTL	qDW.S.3B.28		AX-111550093	chr3B	456007250		0.000137345	3.86219	6.18973
DW.S	DS1	Stable QTL	qDW.S.3B.29		AX-110024201	chr3B	565190921		6.11631e-06	5.21351	8.71359
DW.S	WW	Stable QTL	qDW.S.3B.30		AX-111613177	chr3B	588097891		1.371e-05	4.86296	8.0686
DW.S	DS2/WW	Conditional QTL	qDW.S.3B.31		AX-111529708	chr3B	732142647		3.72154e-06	5.42928	9.11476
DW.S	WW	Stable QTL	qDW.S.3B.32		AX-109983471	chr3B	749023819		3.03535e-05	4.51779	7.34695
DW.S	DS1/WW	Conditional QTL	qDW.S.3D.33		AX-94569370	chr3D	4394608		0.000169079	3.77191	6.14462
DW.S	DS2	Stable QTL	qDW.S.3D.34		AX-109423004	chr3D	425529072		0.000128228	3.89202	6.20313
DW.S	DS2	Stable QTL	qDW.S.3D.35		AX-94882386	chr3D	595883414		0.00010671	3.9718	6.57346
DW.S	DS1	Stable QTL	qDW.S.4A.36		AX-111731093	chr4A	29295568		3.75208e-06	5.42573	8.98717
DW.S	WW	Stable QTL	qDW.S.4A.37		AX-109860616	chr4A	61886839		9.56542e-06	5.0193	8.35755
DW.S	WW	Stable QTL	qDW.S.4A.38		AX-110521684	chr4A	617958899		4.94101e-05	4.30618	6.94887
DW.S	DS2	Stable QTL	qDW.S.4A.39		AX-111060628	chr4A	626114105		7.93267e-06	5.10058	8.90452
DW.S	WW	Stable QTL	qDW.S.4A.40		AX-110432187	chr4A	640175591		0.000177807	3.75005	5.97565
DW.S	DS1/WW	Conditional QTL	qDW.S.4A.41		AX-110970460	chr4A	665754221		2.61471e-05	4.58258	7.46814
DW.S	DS1/WW	Conditional QTL	qDW.S.4A.42		AX-109983818	chr4A	704278101		0.000170021	3.7695	6.08919
DW.S	DS1/WW	Conditional QTL	qDW.S.4A.43		AX-111632438	chr4A	729895763		0.000165731	3.7806	6.35074
DW.S	DS1	Stable QTL	qDW.S.4B.44		AX-111107314	chr4B	14110399		2.21642e-05	4.65435	7.66261
DW.S	WW	Stable QTL	qDW.S.4D.45		AX-89456734	chr4D	1816627		3.21986e-05	4.49216	6.75975
DW.S	DS1	Stable QTL	qDW.S.4D.46		AX-108966084	chr4D	19684799		9.80066e-05	4.00874	6.43713
DW.S	WW	Stable QTL	qDW.S.5A.47		AX-109647660	chr5A	702691069		7.04134e-05	4.15234	6.67463
DW.S	WW	Stable QTL	qDW.S.5B.48		AX-111595852	chr5B	532768970		1.79607e-05	4.74568	8.11232
DW.S	DS1/WW	Conditional QTL	qDW.S.5B.49		AX-108891213	chr5B	586468123		7.68965e-05	4.11409	6.68552
DW.S	DS1	Stable QTL	qDW.S.5B.50		AX-109649704	chr5B	610385323		0.000122687	3.9112	6.36706
DW.S	DS2	Stable QTL	qDW.S.5B.51		AX-94492801	chr5B	622040298		3.38399e-05	4.47057	7.23214
DW.S	DS1/WW	Conditional QTL	qDW.S.5B.52		AX-111020018	chr5B	687993424		3.89071e-05	4.40997	7.17412
DW.S	DS1	Stable QTL	qDW.S.5B.53		AX-111142490	chr5B	707473152		2.19959e-05	4.65766	7.58571
DW.S	DS1	Stable QTL	qDW.S.5D.54		AX-94434867	chr5D	553677904		0.000171619	3.76543	6.26709
DW.S	DS2	Stable QTL	qDW.S.6A.55		AX-111029014	chr6A	12931629		0.000198893	3.70138	6.02373
DW.S	WW	Stable QTL	qDW.S.6A.56		AX-108796185	chr6A	50032605		8.62274e-06	5.06435	8.39718
DW.S	DS2/WW	Conditional QTL	qDW.S.6A.57		AX-109347496	chr6A	598209707		1.02342e-05	4.98994	8.18538
DW.S	DS2/WW	Conditional QTL	qDW.S.6B.58		AX-86166882	chr6B	688297628		1.68794e-05	4.77264	7.89268
DW.S	DS2/DS1	Conditional QTL	qDW.S.6B.59		AX-110587568	chr6B	697711472		0.000250251	3.60162	5.72675
DW.S	DS2/WW	Conditional QTL	qDW.S.6D.60		AX-94384227	chr6D	453006637		1.43115e-05	4.84432	8.02201
DW.S	DS2	Stable QTL	qDW.S.6D.61		AX-110554333	chr6D	473509269		1.92393e-05	4.71581	7.71869
DW.S	DS2/DS1	Conditional QTL	qDW.S.7A.62		AX-111595375	chr7A	12198445		0.000109219	3.9617	6.37443
DW.R	DS2	Stable QTL	qDW.R.1A.1		AX-94795600	chr1A	505269631		0.000117551	3.92977	6.45397
DW.R	WW	Stable QTL	qDW.R.1A.2		AX-110019816	chr1A	574819005		9.12141e-05	4.03994	6.49394
DW.R	DS1/WW	Conditional QTL	qDW.R.1B.3		AX-109913515	chr1B	33922610		4.74769e-05	4.32352	7.05058
DW.R	DS2/DS1	Conditional QTL	qDW.R.1B.4		AX-111713371	chr1B	518532809		4.75022e-05	4.32329	7.12529
DW.R	DS2	Stable QTL	qDW.R.1D.5		AX-108956064	chr1D	16979287		0.000191552	3.71771	6.00534
DW.R	WW	Stable QTL	qDW.R.1D.6		AX-95026093	chr1D	485545030		4.95815e-05	4.30468	7.35525
DW.R	DS2/DS1	Conditional QTL	qDW.R.2A.7		AX-94604266	chr2A	49453669		0.00016541	3.78144	6.02772
DW.R	DS2	Stable QTL	qDW.R.2A.8		AX-86176188	chr2A	70878241		0.000230427	3.63747	5.97445
DW.R	DS2/DS1	Conditional QTL	qDW.R.2A.9		AX-109469483	chr2A	507058254		5.02887e-05	4.29853	7.10935
DW.R	DS2	Stable QTL	qDW.R.2A.10		AX-110970903	chr2A	713216897		7.58521e-05	4.12003	6.62688
DW.R	DS2	Stable QTL	qDW.R.2A.11		AX-94385492	chr2A	760569145		0.00019435	3.71142	5.92002
DW.R	WW	Stable QTL	qDW.R.2A.12		AX-94590094	chr2A	771237573		0.000126867	3.89665	6.3523
DW.R	DS2	Stable QTL	qDW.R.2B.13		AX-110046998	chr2B	90186691		4.0688e-05	4.39053	7.23961
DW.R	DS2	Stable QTL	qDW.R.2B.14		AX-86178523	chr2B	734050245		8.96549e-06	5.04743	8.32957
DW.R	DS2/WW	Conditional QTL	qDW.R.2B.15		AX-111030077	chr2B	783863734		9.17192e-05	4.03754	6.6743
DW.R	WW	Stable QTL	qDW.R.2D.16		AX-110508739	chr2D	14347622		0.00013146	3.88121	6.24836
DW.R	WW	Stable QTL	qDW.R.2D.17		AX-110480398	chr2D	60951276		5.95976e-05	4.22477	6.8953
DW.R	DS2	Stable QTL	qDW.R.2D.18		AX-94897687	chr2D	74938312		6.12745e-05	4.21272	6.86327
DW.R	DS1	Stable QTL	qDW.R.2D.19		AX-95250976	chr2D	598714563		0.000153824	3.81298	6.08914
DW.R	DS1	Stable QTL	qDW.R.3A.20		AX-111153333	chr3A	19478149		9.73886e-05	4.01149	6.43152
DW.R	WW	Stable QTL	qDW.R.3A.21		AX-110954719	chr3A	32145471		1.04249e-05	4.98193	8.1942
DW.R	WW	Stable QTL	qDW.R.3A.22		AX-94822381	chr3A	516803269		0.000158249	3.80066	6.06615
DW.R	DS1/WW	Conditional QTL	qDW.R.3B.23		AX-109911908	chr3B	39363804		2.07911e-05	4.68212	8.35483
DW.R	DS1/WW	Conditional QTL	qDW.R.3B.24		AX-111138706	chr3B	82409567		9.66219e-05	4.01492	6.61305
DW.R	WW	Stable QTL	qDW.R.3B.25		AX-94938118	chr3B	470046721		2.66514e-05	4.57428	7.44763
DW.R	WW	Stable QTL	qDW.R.3B.26		AX-110918958	chr3B	513928526		4.56616e-05	4.34045	7.0593
DW.R	DS2	Stable QTL	qDW.R.3B.27		AX-110935236	chr3B	764346169		5.25683e-05	4.27928	6.98318
DW.R	DS1	Stable QTL	qDW.R.3D.28		AX-111543252	chr3D	566738033		8.43569e-05	4.07388	6.58256
DW.R	DS2	Stable QTL	qDW.R.4A.29		AX-109017673	chr4A	38360500		7.5674e-05	4.12105	6.66648
DW.R	DS1/WW	Conditional QTL	qDW.R.4A.30		AX-111537465	chr4A	593283007		0.000130034	3.88594	6.29706
DW.R	DS2/WW	Conditional QTL	qDW.R.4A.31		AX-108763710	chr4A	602048706		4.17715e-06	5.37912	8.95127
DW.R	DS2	Stable QTL	qDW.R.4A.32		AX-94906127	chr4A	709613534		2.29073e-05	4.64003	7.82325
DW.R	DS2/DS1	Conditional QTL	qDW.R.4A.33		AX-108988750	chr4A	740377628		5.41028e-05	4.26678	6.99343
DW.R	DS2/DS1	Conditional QTL	qDW.R.5A.34		AX-108928236	chr5A	590524474		0.000184643	3.73367	5.95006
DW.R	DS2/WW	Conditional QTL	qDW.R.5A.35		AX-110387938	chr5A	637460395		8.79107e-06	5.05596	8.37182
DW.R	DS2/WW	Conditional QTL	qDW.R.5B.36		AX-109878483	chr5B	34894340		5.39145e-05	4.26829	6.98242
DW.R	WW	Stable QTL	qDW.R.5B.37		AX-110600781	chr5B	576922153		9.95327e-06	5.00203	8.27495
DW.R	DS1	Stable QTL	qDW.R.5B.38		AX-109619399	chr5B	668477417		0.000216341	3.66486	5.8354
DW.R	DS2	Stable QTL	qDW.R.5B.39		AX-110112107	chr5B	707473268		3.47468e-05	4.45909	7.24554
DW.R	DS1	Stable QTL	qDW.R.5D.40		AX-109324087	chr5D	348270969		0.000135352	3.86854	6.17584
DW.R	DS1/WW	Conditional QTL	qDW.R.5D.41		AX-110253278	chr5D	469486357		0.000152933	3.8155	6.07267
DW.R	DS1/WW	Conditional QTL	qDW.R.5D.42		AX-94593930	chr5D	562338950		6.88511e-05	4.16209	6.78734
DW.R	DS2	Stable QTL	qDW.R.6A.43		AX-110070158	chr6A	49148063		2.87282e-05	4.54169	7.76891
DW.R	WW	Stable QTL	qDW.R.6A.44		AX-111551942	chr6A	606963848		0.000144345	3.8406	6.12263
DW.R	DS2/DS1	Conditional QTL	qDW.R.6B.45		AX-94441843	chr6B	9036350		8.41291e-05	4.07505	5.90696
DW.R	WW	Stable QTL	qDW.R.6B.46		AX-108902462	chr6B	708228698		0.000208887	3.68009	5.89902
DW.R	DS2	Stable QTL	qDW.R.6D.47		AX-110819195	chr6D	460082314		0.000227799	3.64245	5.85903
DW.R	DS2/DS1	Conditional QTL	qDW.R.7A.48		AX-94788404	chr7A	1409523		0.000183541	3.73627	6.20973
DW.R	DS2	Stable QTL	qDW.R.7A.49		AX-94617813	chr7A	19546330		6.45808e-05	4.1899	6.32524
DW.R	DS1/WW	Conditional QTL	qDW.R.7A.50		AX-111014051	chr7A	42709510		5.87215e-05	4.2312	6.86965
DW.R	DS1/WW	Conditional QTL	qDW.R.7A.51		AX-109889263	chr7A	74894664		8.74575e-05	4.0582	6.85304
DW.R	DS1/WW	Conditional QTL	qDW.R.7A.52		AX-108799132	chr7A	113925034		0.000124831	3.90368	6.31943
DW.R	DS2	Stable QTL	qDW.R.7B.53		AX-110568255	chr7B	13800690		8.33605e-05	4.07904	6.56403
DW.R	DS2	Stable QTL	qDW.R.7B.54		AX-109301670	chr7B	293143229		0.000163084	3.78759	6.09081
DW.R	WW	Stable QTL	qDW.R.7D.55		AX-109605525	chr7D	39501956		9.60109e-05	4.01768	6.7005
DW.R	DS2/WW	Conditional QTL	qDW.R.7D.56		AX-110814698	chr7D	55643125		0.000111931	3.95105	6.40768
RSA	DS2	Stable QTL	qRSA.1A.1		AX-94689921	chr1A	420065067		9.57149e-05	4.01902	6.48405
RSA	DS1	Stable QTL	qRSA.1A.2		AX-89391633	chr1A	554041361		0.000154243	3.81179	6.08325
RSA	DS2/DS1	Conditional QTL	qRSA.1B.3		AX-111644094	chr1B	594651517		5.80575e-05	4.23614	6.87003
RSA	DS2/DS1	Conditional QTL	qRSA.1B.4		AX-94483188	chr1B	679748263		9.14698e-06	5.03872	8.47403
RSA	DS2/DS1	Conditional QTL	qRSA.1D.5		AX-109483221	chr1D	360382205		9.45424e-05	4.02437	6.4377
RSA	DS2/DS1	Conditional QTL	qRSA.2A.6		AX-111177158	chr2A	135193528		8.64064e-05	4.06345	6.56058
RSA	DS2	Stable QTL	qRSA.2A.7		AX-111154961	chr2A	712700653		3.56816e-05	4.44756	7.40576
RSA	DS2	Stable QTL	qRSA.2A.8		AX-94416062	chr2A	748542311		0.000140712	3.85167	6.15726
RSA	DS2/WW	Conditional QTL	qRSA.2A.9		AX-110026606	chr2A	759486019		9.3021e-05	4.03142	6.75681
RSA	DS2/WW	Conditional QTL	qRSA.2A.10		AX-110403132	chr2A	775583563		5.36097e-05	4.27076	6.99398
RSA	DS1/WW	Conditional QTL	qRSA.2B.11		AX-109334892	chr2B	27087547		0.000129459	3.88787	6.37681
RSA	DS2/DS1	Conditional QTL	qRSA.2B.12		AX-108795644	chr2B	694329486		0.000135144	3.8692	6.26279
RSA	WW	Stable QTL	qRSA.2B.13		AX-94831122	chr2B	734127094		0.000162418	3.78937	6.03005
RSA	WW	Stable QTL	qRSA.2B.14		AX-111456063	chr2B	745035862		1.58273e-05	4.80059	7.84599
RSA	DS2/WW	Conditional QTL	qRSA.2B.15		AX-111524164	chr2B	778923051		8.95758e-06	5.04781	8.42139
RSA	DS2/WW	Conditional QTL	qRSA.2D.16		AX-94584252	chr2D	8890102		0.000137075	3.86304	6.23695
RSA	DS2/WW	Conditional QTL	qRSA.2D.17		AX-94405374	chr2D	144996335		2.475e-06	5.60642	9.29654
RSA	DS2	Stable QTL	qRSA.2D.18		AX-95205011	chr2D	573969914		0.000109202	3.96177	6.54134
RSA	DS2/DS1	Conditional QTL	qRSA.2D.19		AX-111800007	chr2D	646449598		0.000117034	3.93169	6.59424
RSA	WW	Stable QTL	qRSA.3A.20		AX-95148936	chr3A	32173293		3.88224e-06	5.41092	9.61789
RSA	DS1	Stable QTL	qRSA.3A.21		AX-110944149	chr3A	456874845		0.000138221	3.85943	6.21932
RSA	DS2/DS1	Conditional QTL	qRSA.3A.22		AX-94646681	chr3A	717492210		7.19476e-05	4.14298	6.95942
RSA	WW	Stable QTL	qRSA.3B.23		AX-109913634	chr3B	280727464		1.9939e-06	5.7003	9.95164
RSA	DS2/DS1	Conditional QTL	qRSA.3B.24		AX-111590010	chr3B	493647452		0.000109178	3.96186	6.35234
RSA	DS1	Stable QTL	qRSA.3B.25		AX-109365701	chr3B	512507180		0.000123275	3.90912	6.33493
RSA	DS2/WW	Conditional QTL	qRSA.3B.26		AX-110069645	chr3B	758895695		0.000149663	3.82488	6.2354
RSA	DS1	Stable QTL	qRSA.3B.27		AX-111473117	chr3B	802848431		0.000188763	3.72408	5.92652
RSA	DS1	Stable QTL	qRSA.3B.28		AX-110569098	chr3B	814645628		6.76067e-05	4.17001	7.12832
RSA	WW	Stable QTL	qRSA.3D.29		AX-109989354	chr3D	454349449		5.34528e-05	4.27203	6.9061
RSA	DS2/DS1	Conditional QTL	qRSA.4A.30		AX-109430702	chr4A	53753651		5.41909e-05	4.26607	6.95201
RSA	DS2/DS1	Conditional QTL	qRSA.4A.31		AX-108825392	chr4A	601380776		0.000207407	3.68318	5.85429
RSA	DS1/WW	Conditional QTL	qRSA.4B.32		AX-86172777	chr4B	20588956		6.62407e-05	4.17887	6.79988
RSA	WW	Stable QTL	qRSA.4B.33		AX-108856908	chr4B	650678467		6.44086e-05	4.19106	6.91563
RSA	DS2/WW	Conditional QTL	qRSA.4D.34		AX-89615489	chr4D	305326750		0.000211462	3.67477	5.86337
RSA	DS1/WW	Conditional QTL	qRSA.4D.35		AX-111926032	chr4D	476884193		7.51601e-05	4.12401	6.70107
RSA	DS2	Stable QTL	qRSA.4D.36		AX-94424124	chr4D	498897680		1.96993e-05	4.70555	8.32354
RSA	DS2/DS1	Conditional QTL	qRSA.5A.37		AX-110104186	chr5A	586727254		0.000133102	3.87582	6.22409
RSA	DS2	Stable QTL	qRSA.5A.38		AX-111146202	chr5A	657191599		0.000211225	3.67525	5.91134
RSA	DS2/WW	Conditional QTL	qRSA.5B.39		AX-111651381	chr5B	401012981		1.90258e-05	4.72066	7.71134
RSA	WW	Stable QTL	qRSA.5B.40		AX-108740226	chr5B	573813518		0.000219697	3.65818	5.90678
RSA	DS1/WW	Conditional QTL	qRSA.5B.41		AX-109641123	chr5B	590655432		0.00019166	3.71747	5.99306
RSA	WW	Stable QTL	qRSA.5B.42		AX-94456777	chr5B	658739921		1.2506e-05	4.90288	8.16034
RSA	WW	Stable QTL	qRSA.5B.43		AX-108764049	chr5B	681133261		0.000212653	3.67233	5.94264
RSA	DS2/DS1	Conditional QTL	qRSA.5D.44		AX-110955411	chr5D	224948340		6.18837e-05	4.20842	6.76508
RSA	DS2/DS1	Conditional QTL	qRSA.5D.45		AX-110954664	chr5D	243313802		0.000160088	3.79564	6.03057
RSA	WW	Stable QTL	qRSA.5D.46		AX-110958036	chr5D	469179441		9.88265e-05	4.00513	6.456
RSA	WW	Stable QTL	qRSA.5D.47		AX-94573941	chr5D	522141807		3.56837e-05	4.44753	7.24843
RSA	WW	Stable QTL	qRSA.6A.48		AX-110549188	chr6A	29075465		0.000179406	3.74616	6.02681
RSA	DS1/WW	Conditional QTL	qRSA.6A.49		AX-110446489	chr6A	73383147		1.59428e-05	4.79744	8.06921
RSA	DS1/WW	Conditional QTL	qRSA.6A.50		AX-108906907	chr6A	104354249		5.9185e-06	5.22779	8.57123
RSA	DS2/WW	Conditional QTL	qRSA.6A.51		AX-110436830	chr6A	291655644		6.32408e-05	4.199	6.75299
RSA	DS2	Stable QTL	qRSA.6B.52		AX-108853943	chr6B	685977041		0.00011977	3.92165	6.33451
RSA	WW	Stable QTL	qRSA.6D.53		AX-110162309	chr6D	8916165		1.16657e-05	4.93309	8.33572
RSA	WW	Stable QTL	qRSA.7A.54		AX-94424536	chr7A	21353471		8.31214e-06	5.08029	8.37591
RSA	DS2/WW	Conditional QTL	qRSA.7A.55		AX-108944221	chr7A	54876981		5.5992e-05	4.25187	7.05462
RSA	WW	Stable QTL	qRSA.7A.56		AX-110534303	chr7A	89627358		3.3229e-05	4.47848	7.58119
RSA	DS2/DS1	Conditional QTL	qRSA.7A.57		AX-111580376	chr7A	239424533		6.51936e-05	4.1858	6.75223
RSA	DS1/WW	Conditional QTL	qRSA.7A.58		AX-109967010	chr7A	262120203		7.70065e-05	4.11347	6.62312
RSA	DS2/DS1	Conditional QTL	qRSA.7A.59		AX-94757082	chr7A	436070649		1.22943e-05	4.9103	8.07485
RSA	DS2/DS1	Conditional QTL	qRSA.7A.60		AX-111494125	chr7A	469438246		6.56061e-05	4.18306	6.80274
RSA	DS1/WW	Conditional QTL	qRSA.7A.61		AX-111187111	chr7A	511500710		7.55918e-05	4.12153	6.61502
RSA	DS2/DS1	Conditional QTL	qRSA.7A.62		AX-111018758	chr7A	527531491		1.0217e-05	4.99068	8.21807
RSA	DS2/DS1	Conditional QTL	qRSA.7A.63		AX-108927312	chr7A	536510533		1.00646e-05	4.9972	8.26295
RSA	DS2/WW	Conditional QTL	qRSA.7A.64		AX-108804668	chr7A	582214612		0.000133848	3.87339	6.66211
RSA	DS1/WW	Conditional QTL	qRSA.7A.65		AX-111232159	chr7A	642337455		5.69356e-05	4.24462	7.02873
RSA	DS2	Stable QTL	qRSA.7A.66		AX-110908706	chr7A	706363667		4.64234e-05	4.33326	7.02157
RSA	DS1	Stable QTL	qRSA.7B.67		AX-94544226	chr7B	148225484		7.96067e-05	4.09905	6.7325
RSA	DS1	Stable QTL	qRSA.7B.68		AX-94627259	chr7B	713360565		5.22186e-05	4.28217	7.09607
RSA	DS2/WW	Conditional QTL	qRSA.7B.69		AX-110167009	chr7B	725725016		6.51311e-05	4.18621	6.78525
RSA	DS2/DS1	Conditional QTL	qRSA.7D.70		AX-95096944	chr7D	4515360		0.000245556	3.60985	5.77073
RSA	DS1	Stable QTL	qRSA.7D.71		AX-111496634	chr7D	14784176		0.000184855	3.73317	5.91758
RSA	DS2/DS1	Conditional QTL	qRSA.7D.72		AX-95226937	chr7D	385712816		4.81029e-05	4.31783	6.9878
RSA	DS2/DS1	Conditional QTL	qRSA.7D.73		AX-110584261	chr7D	397573818		2.99938e-05	4.52297	7.32384
RSA	DS2	Stable QTL	qRSA.7D.74		AX-86172621	chr7D	463039931		6.38385e-05	4.19492	6.80093

## Sheet: Supplemental Table 3
Supplemental Table 3. Summary of reads mapping of population-transcriptome sequencing
GWAS_ID	WW_Shoot	DW1_Shoot	DS2_Shoot	WW_Root	DS1_Root	DS2_Root	Average Reads
XJ.GWAS_002	7756378	6686787	5346082	7305257	5928229	2399142	5.90365e+06
XJ.GWAS_003	6955564	4986231	8460159	7942147	7518348	6491135	7.05893e+06
XJ.GWAS_008	4917396	8034410	4106183	4918188	8803369	5358085	6.02294e+06
XJ.GWAS_012	4310900	6119035	7269368	15420967	8272501	5753869	7.85777e+06
XJ.GWAS_037	3994621	3458161	8082274	-	-	3681085	4.80404e+06
XJ.GWAS_038	3868668	3691225	1266670	5423408	1292711	4884732	3404569
XJ.GWAS_039	-	4611934	5371327	5595823	4222457	4155034	4791315
XJ.GWAS_040	7339134	7931395	15670732	4964198	10985640	2938237	8.30489e+06
XJ.GWAS_042	5003017	9968455	10001910	4585130	1557599	6212840	6.22149e+06
XJ.GWAS_048	3549087	10756910	3335252	5522502	-	6669439	5966638
XJ.GWAS_057	7657237	12952146	16045505	5718532	4935159	7998659	9217873
XJ.GWAS_061	6934368	4329398	4256620	7008161	645878	5636793	4.80187e+06
XJ.GWAS_062	7552301	4802138	7642784	9785043	1681638	10555214	7.00319e+06
XJ.GWAS_063	4816768	8654208	6677049	7727663	8526554	2975026	6562878
XJ.GWAS_065	6468698	9325673	4611500	2861476	3246717	12338639	6.47545e+06
XJ.GWAS_068	2369854	8378616	3564171	6530427	11981691	9510438	7.05587e+06
XJ.GWAS_072	4923556	5412625	9640582	9246943	13300466	10304314	8.80475e+06
XJ.GWAS_076	2165714	3721539	4646689	6134677	2987004	10802539	5.07636e+06
XJ.GWAS_079	-	-	-	3920994	13344273	5041878	7435715
XJ.GWAS_081	13053554	12059948	12914108	12587917	7787790	28491748	1.44825e+07
XJ.GWAS_082	5114961	2551449	5638776	1816133	5390715	3440998	3992172
XJ.GWAS_085	3147742	2322638	3849545	3780621	1623477	7721521	3740924
XJ.GWAS_086	4517608	17560206	2338851	13476770	2682174	10475653	8.50854e+06
XJ.GWAS_087	1014563	8764791	8813549	4208137	1654615	1515047	4.32845e+06
XJ.GWAS_089	1393858	6212947	-	2283992	13002789	7567407	6.0922e+06
XJ.GWAS_090	8893177	3544003	16283712	5784991	4118966	-	7.72497e+06
XJ.GWAS_091	7075101	3106625	8662883	4395537	10884153	5812380	6.65611e+06
XJ.GWAS_092	15640565	4032731	5613289	6820396	1072386	7552973	6.78872e+06
XJ.GWAS_093	10133376	8510455	4947476	7726812	5852562	3947657	6.85306e+06
XJ.GWAS_094	7837550	-	6741816	7293961	8767779	3643597	6.85694e+06
XJ.GWAS_095	1011376	6283420	1672533	12453778	7274742	6666026	5.89365e+06
XJ.GWAS_098	7960411	10126504	6022651	4985051	3904854	2641320	5.94013e+06
XJ.GWAS_101	11440097	3909326	13833718	7385625	5969311	3608427	7691084
XJ.GWAS_102	1413143	10438200	12314894	6996723	11537548	10572685	8.87887e+06
XJ.GWAS_104	5539748	6283695	13676628	8615313	6928718	22055553	1.05166e+07
XJ.GWAS_107	4819447	6125729	3240357	5273097	886285	3073220	3.90302e+06
XJ.GWAS_109	7152689	3529621	9633301	3867211	8297665	10992817	7.24555e+06
XJ.GWAS_114	4924832	16827435	5157499	8958449	3607266	5664031	7523252
XJ.GWAS_118	10496206	12859658	6587233	5251840	5892155	7974919	8.177e+06
XJ.GWAS_119	2092472	4302477	4948856	5236746	555314	9405372	4.42354e+06
XJ.GWAS_120	10690959	2957348	14611679	4876732	6524386	3243920	7.15084e+06
XJ.GWAS_123	10914019	8090899	7145330	6245094	6234540	2235322	6.81087e+06
XJ.GWAS_124	5044665	3756296	4743974	4124900	4067017	5516941	4.5423e+06
XJ.GWAS_125	4313768	11155855	4791622	5097096	4086825	5284123	5.78821e+06
XJ.GWAS_126	11275714	8081612	3018046	8368272	3494767	7659902	6.98305e+06
XJ.GWAS_128	4136480	9109682	9245751	6714212	2524163	5042363	6.12878e+06
XJ.GWAS_129	5480255	3047207	4502461	8111323	18296072	11872577	8.55165e+06
XJ.GWAS_131	9460080	9488602	1109648	9383641	5738774	7993966	7.19579e+06
XJ.GWAS_132	7844612	5825683	5982548	2938773	2737441	5517835	5.14115e+06
XJ.GWAS_135	8421517	1997762	7512760	11419356	15990847	10973772	9.386e+06
XJ.GWAS_136	-	6634510	6825098	12210612	4740232	8127048	7707500
XJ.GWAS_140	7743947	2948337	2589650	5746060	7996277	7193849	5703020
XJ.GWAS_144	3614868	-	2136632	2676381	4507360	9871018	4.56125e+06
XJ.GWAS_155	4856756	2895022	8379574	6652591	5010370	8302413	6016121
XJ.GWAS_158	1598255	16466227	7959997	4426658	2674682	6319431	6.57421e+06
XJ.GWAS_173	12687384	7593364	4657763	4086300	14347266	-	8.67442e+06
XJ.GWAS_177	4260106	6437695	3194781	10929386	11530470	4119428	6745311
XJ.GWAS_189	2710532	10092229	7680961	5618878	8258643	7237453	6933116
XJ.GWAS_193	5909767	4872855	6102779	10867157	8634134	2520035	6.48445e+06
XJ.GWAS_208	9717908	7577743	3917766	13461695	5678487	4872966	7.53776e+06
XJ.GWAS_219	-	5325386	10786493	3221565	6483332	6524629	6468281
XJ.GWAS_257	4017076	9431727	8531671	11536272	-	2028152	7.10898e+06
XJ.GWAS_268	7875816	2125178	4707784	533656	8568213	6987823	5.13308e+06
XJ.GWAS_275	5643434	-	6262421	4804749	6207989	8032451	6.19021e+06
XJ.GWAS_301	9523164	9814630	4239260	3881780	2034216	2954111	5.40786e+06
XJ.GWAS_306	13289477	8672857	3433454	18330312	6808688	8928760	9.91059e+06
XJ.GWAS_307	2350716	5082657	3048076	2864804	11766550	10016515	5.85489e+06
XJ.GWAS_342	5015785	2398058	8094023	14891087	6297841	7267018	7327302
XJ.GWAS_353	4783163	2020926	9520687	5730256	4162210	2953236	4.86175e+06
XJ.GWAS_354	8404120	10654130	4819527	5897325	10399665	10299519	8412381
XJ.GWAS_359	7607210	4229849	4067087	4909451	3461011	1001272	4.21265e+06
XJ.GWAS_361	4098175	9756191	5094341	14533254	7798669	6498440	7.96318e+06
XJ.GWAS_362	2933210	7077330	10268293	2817238	8169132	3437831	5783839
XJ.GWAS_363	9052403	9288566	5997808	7098581	6562809	6384153	7.39739e+06
XJ.GWAS_364	10198752	4622468	3887793	8030721	3592450	14118037	7.40837e+06
XJ.GWAS_366	8841027	5276364	2803011	4017171	2233421	9812316	5.49722e+06
XJ.GWAS_369	6114683	1005021	8968418	4677535	9893668	8056423	6.45262e+06
XJ.GWAS_370	8765558	7895999	10069814	2698079	10891132	14705129	9.17095e+06
XJ.GWAS_371	9874705	4790414	6597666	6992042	5868746	3335735	6243218
XJ.GWAS_372	2544001	1873200	8198098	5307533	6641457	5289338	4.9756e+06
XJ.GWAS_377	1905370	3549033	19080648	7433183	9694570	8949302	8435351
XJ.GWAS_380	6262721	5316789	3425933	4375924	3478238	6194338	4.84232e+06
XJ.GWAS_382	2165375	5271383	7028726	6554050	5977464	5630860	5.43798e+06
XJ.GWAS_383	2193066	4755982	4094787	9358531	12189501	-	6.51837e+06
XJ.GWAS_384	1769739	3261445	2685458	7085688	6878076	11328019	5.5014e+06
XJ.GWAS_386	6056925	5480771	4034143	4648176	6200748	8405959	5.80445e+06
XJ.GWAS_390	12573290	2022303	8032100	4266617	10432327	12724545	8.34186e+06
XJ.GWAS_396	9363873	10097778	4947599	9068604	3833436	6152686	7243996
XJ.GWAS_399	8672660	5904201	8032996	-	15247396	6694968	8.91044e+06
XJ.GWAS_403	10378201	10182225	4387388	12822660	1190619	4046346	7.16791e+06
XJ.GWAS_404	7834704	3397688	-	1901657	6136649	3895828	4.63331e+06
XJ.GWAS_410	10992072	6676252	3879823	5560601	1882958	3940781	5.48875e+06
XJ.GWAS_413	7370788	15203828	5305781	8243582	7827700	6930186	8.48031e+06
XJ.GWAS_414	1122229	5461374	8454712	6199829	6396634	4426020	5.34347e+06
XJ.GWAS_416	5812567	5474682	9350347	4545866	6941222	4641838	6.12775e+06
XJ.GWAS_417	11912450	5433801	8158075	5927265	6307363	-	7.54779e+06
XJ.GWAS_418	9305581	9698170	6051347	3763196	8778360	3392719	6.83156e+06
XJ.GWAS_419	4037414	5670710	1981221	1099855	6817452	9068488	4779190
XJ.GWAS_420	5857048	3114677	6869277	11063822	4929929	5834309	6278177
XJ.GWAS_423	2416924	7940627	14730812	9571539	4736782	6982712	7.7299e+06
XJ.GWAS_425	5607270	6836430	12699573	510049	11285906	7282849	7.37035e+06
XJ.GWAS_427	12729089	12283985	8539228	6524850	14954177	2854806	9.64769e+06
XJ.GWAS_430	10624277	9044075	953024	7503212	8765243	4839041	6954812
XJ.GWAS_431	10876541	5954397	1904204	4902015	7816947	2700307	5.6924e+06
XJ.GWAS_435	7472258	7777954	6998829	1011764	6934100	3010993	5.53432e+06
XJ.GWAS_438	4505967	9861590	4025343	8787861	2908960	-	6.01794e+06
XJ.GWAS_441	13581602	7397426	6926417	10300312	-	12553164	1.01518e+07
XJ.GWAS_443	6670083	6918044	4694285	961612	5913563	4708608	4.9777e+06
XJ.GWAS_446	6764073	8068840	1308410	7255407	5379191	6041308	5.80287e+06
XJ.GWAS_448	8955443	2041626	5081667	3072916	11271264	14035621	7.40976e+06

## Sheet: Supplemental Table 4
Supplemental Table 4. Identified differentially expressed genes in the population-transcriptome
GeneID	Anno	chr	Position1 (bp)	Position2 (bp)		Shoot										Root
						Edger	GFOLD	DEG	CPM_WW	CPM_DS1	CPM_DS2	CV_WW	CV_DS1	CV_DS2		Edger	GFOLD	DEG	CPM_WW	CPM_DS1	CPM_DS2	CV_WW	CV_DS1	CV_DS2
TraesCS1A02G000100		chr1A	40098	70338		-	Yes	-	1.57282	1.03663	1.86838	2.21155	2.97895	2.30861		-	Yes	-	5.11724	4.19437	5.05652	1.09645	1.53665	1.23087
TraesCS1A02G000200		chr1A	70239	89245		-	Yes	-	2.33551	1.25629	2.42643	2.03679	3.32478	2.20243		-	Yes	-	4.39258	3.43166	4.0652	1.3124	1.47856	1.25277
TraesCS1A02G000400		chr1A	102794	122504		-	Yes	-	2.8603	1.69935	3.32264	2.07466	3.0485	2.10915		-	Yes	-	8.0474	7.32208	8.51784	1.1444	1.40767	1.46296
TraesCS1A02G000900		chr1A	233818	245051		Yes	Yes	Yes	2.48055	0.940747	0.850244	6.64262	3.6941	1.98132		-	Yes	-	2.59243	2.12248	2.56535	1.15856	1.49337	1.36206
TraesCS1A02G001000		chr1A	270605	272936		Yes	Yes	Yes	1.02007	0.633037	1.3534	2.26562	2.66345	2.7481		-	Yes	-	2.87792	3.01255	2.86673	1.13434	1.4738	1.27791
TraesCS1A02G001100		chr1A	269472	289602		-	Yes	-	1.42627	0.761398	1.72621	2.0309	2.79216	2.35696		-	Yes	-	2.94613	2.39307	2.70862	1.29851	1.39926	1.19007
TraesCS1A02G001400		chr1A	294611	305428		-	Yes	-	0.831508	0.588216	1.14407	2.0161	2.96176	2.3433		-	Yes	-	2.09044	1.89394	2.09592	1.12063	1.54165	1.24746
TraesCS1A02G001500		chr1A	326099	326518		-	-	-	-	-	-	-	-	-		Yes	-	-	0.541088	0.389846	0.354878	1.95878	2.43294	1.93497
TraesCS1A02G001800		chr1A	1144333	1145934		-	-	-	129.728	136.406	119.51	0.268192	0.238061	0.295026		-	Yes	-	14.436	14.6945	13.7605	0.408062	0.359994	0.360183
TraesCS1A02G001900		chr1A	1159194	1162830		-	-	-	19.1959	19.6567	21.2652	0.424461	0.363204	0.451134		Yes	Yes	Yes	19.1546	16.5883	16.6467	0.480356	0.534728	0.579692
TraesCS1A02G002000		chr1A	1163485	1167878		-	-	-	1.81402	1.74945	1.78598	0.677748	0.679429	0.685433		Yes	Yes	Yes	2.27247	2.10996	1.9826	0.885412	0.913657	0.699122
TraesCS1A02G002100		chr1A	1170356	1177383		-	Yes	-	3.62615	3.83876	4.08533	0.748313	0.688578	0.777817		-	-	-	1.17395	1.48026	1.75143	1.01523	1.09932	1.01706
TraesCS1A02G002200		chr1A	1188844	1190864		-	-	-	38.5727	39.1129	39.3717	0.338704	0.304517	0.297366		-	Yes	-	63.781	73.479	69.418	0.432565	0.440725	0.454219
TraesCS1A02G002300		chr1A	1209721	1212812		Yes	-	-	8.74621	8.40636	8.2783	0.586737	0.468398	0.43065		-	-	-	0.674362	0.750146	0.931806	1.23276	1.53051	0.985681
TraesCS1A02G002500		chr1A	1232354	1238469		Yes	-	-	10.7828	10.0661	9.86234	0.466586	0.399001	0.41016		-	Yes	-	16.2625	16.0421	17.8534	0.625016	0.661927	0.522903
TraesCS1A02G002700		chr1A	1336841	1348326		-	-	-	18.7036	18.7423	20.7482	0.360251	0.360153	0.40293		-	Yes	-	29.3838	27.5385	30.1831	0.594711	0.657219	0.578989
TraesCS1A02G005400		chr1A	3117194	3118502		-	-	-	0.527508	0.512209	0.466046	1.78063	1.66029	1.52047		Yes	-	-	1.06504	0.798231	0.551966	1.71223	1.10105	1.19345
TraesCS1A02G005500		chr1A	3119378	3122276		Yes	-	-	8.08365	9.51506	10.3093	0.437662	0.464252	0.470657		-	Yes	-	4.81998	4.06342	4.54146	0.777906	0.778449	0.593417
TraesCS1A02G005600		chr1A	3255618	3262577		Yes	-	-	3.2738	3.4081	3.41233	0.717678	0.707533	0.695992		-	Yes	-	3.3502	2.84065	3.6143	0.783282	0.888392	0.958305
TraesCS1A02G005700		chr1A	3377838	3383699		Yes	Yes	Yes	5.30946	5.47407	5.76576	1.05299	0.82165	0.94374		-	Yes	-	7.59823	6.58309	7.384	0.889895	0.879857	0.864528
TraesCS1A02G005800		chr1A	3386287	3391808		Yes	-	-	12.78	11.5162	11.8979	0.920924	0.734105	0.68017		Yes	Yes	Yes	10.8475	9.00498	7.83421	0.756141	0.763046	0.589778
TraesCS1A02G007500		chr1A	4045713	4048684		-	Yes	-	55.0846	61.9483	54.4961	0.708016	0.670253	0.628451		Yes	Yes	Yes	3.7346	4.1783	4.46604	0.745727	0.728283	0.70034
TraesCS1A02G007900		chr1A	4063197	4063406		Yes	Yes	Yes	4.8934	4.79427	4.7962	0.763132	0.676699	0.792795		-	-	-	0.608157	0.691355	0.767361	2.93492	1.51082	1.28979
TraesCS1A02G009000		chr1A	5491027	5495112		Yes	-	-	7.09096	8.0352	8.97407	0.465884	0.493847	0.504113		-	Yes	-	4.69504	4.64748	5.48352	0.734281	0.699137	0.70104
TraesCS1A02G009700		chr1A	6022742	6023437		-	-	-	-	-	-	-	-	-		Yes	Yes	Yes	3.22589	3.30399	4.27531	2.46023	2.18926	2.67414
TraesCS1A02G010200		chr1A	6317837	6324253		-	-	-	1.08136	0.722625	0.378633	1.63708	1.45655	1.70705		Yes	Yes	Yes	6.19009	5.30543	4.80517	1.07013	1.21219	1.23725
TraesCS1A02G011100		chr1A	6566139	6567972		-	-	-	1.57348	1.69443	1.70286	1.19324	1.18834	1.20835		Yes	-	-	1.57488	1.58045	1.66659	1.25239	1.48296	1.21933
TraesCS1A02G011600		chr1A	6766340	6766555		Yes	-	-	3.3386	3.45608	3.72248	0.782326	0.804992	0.825739		-	Yes	-	4.33297	4.72192	4.05461	1.25253	1.14036	1.0294
TraesCS1A02G012500		chr1A	7178200	7184960		Yes	Yes	Yes	5.78027	5.79139	6.07467	0.514314	0.452359	0.525823		-	Yes	-	5.42279	5.0611	5.9044	0.793084	0.715736	0.621412
TraesCS1A02G012600		chr1A	7185497	7186507		-	-	-	-	-	-	-	-	-		Yes	Yes	Yes	22.3588	22.887	27.8877	0.662695	0.716278	0.609001
TraesCS1A02G012700		chr1A	7228719	7229943		-	-	-	-	-	-	-	-	-		Yes	Yes	Yes	6.362	6.45508	6.49918	0.846818	0.86845	0.920321
TraesCS1A02G012800		chr1A	7274801	7275803		-	-	-	-	-	-	-	-	-		-	Yes	-	6.58778	7.90076	6.48192	0.680949	0.777576	0.738471
TraesCS1A02G012900		chr1A	7276861	7279534		-	-	-	-	-	-	-	-	-		Yes	Yes	Yes	13.1241	11.6307	10.5548	0.539286	0.57915	0.515232
TraesCS1A02G013000		chr1A	7281836	7294634		-	-	-	-	-	-	-	-	-		-	Yes	-	9.31244	8.02643	10.1112	0.838016	0.716659	0.780014
TraesCS1A02G013600		chr1A	7642614	7643473		-	Yes	-	62.4797	67.0919	70.3085	0.972785	0.603416	0.69339		-	Yes	-	298.315	281.949	298.56	0.591207	0.587351	0.583577
TraesCS1A02G013700		chr1A	7651464	7654123		Yes	Yes	Yes	4.03281	3.87995	4.25372	0.560068	0.530697	0.689945		-	Yes	-	3.05746	3.30289	3.14219	0.934894	0.778374	0.82206
TraesCS1A02G013800		chr1A	7657145	7669998		Yes	Yes	Yes	29.5441	25.6867	23.9162	0.472846	0.374366	0.421854		-	Yes	-	29.547	29.9259	31.7584	0.377899	0.409428	0.362984
TraesCS1A02G013900		chr1A	7675688	7677264		-	-	-	-	-	-	-	-	-		-	Yes	-	3.80338	3.42228	3.66666	0.961258	0.66557	0.718726
TraesCS1A02G014800		chr1A	7962375	7963154		Yes	-	-	2.31451	1.86758	1.71478	1.29396	1.11023	1.26528		Yes	Yes	Yes	82.171	70.4316	73.9096	0.790644	0.706152	0.731292
TraesCS1A02G014900		chr1A	8141960	8144500		-	-	-	-	-	0.430265	-	-	1.74454		Yes	-	-	0.906282	0.751731	1.30552	1.41418	1.4178	1.3038
TraesCS1A02G015100		chr1A	8238257	8239411		-	Yes	-	21.1532	21.9844	21.8971	0.669599	0.669207	0.591562		-	-	-	0.386035	0.321661	0.550252	1.66925	1.66435	1.98819
TraesCS1A02G015200		chr1A	8239469	8244826		Yes	-	-	8.13923	8.88153	9.61159	0.385546	0.388503	0.426156		Yes	Yes	Yes	7.90258	7.24855	8.30563	0.542601	0.493147	0.497339
TraesCS1A02G015400		chr1A	8264166	8266341		-	Yes	-	4.74038	5.45587	4.64215	0.53656	0.497034	0.522118		Yes	Yes	Yes	6.42263	7.01963	8.02376	0.586817	0.541918	0.522037
TraesCS1A02G015500		chr1A	8291349	8292883		-	-	-	-	-	-	-	-	-		Yes	Yes	Yes	7.88757	8.7007	11.018	0.86536	0.841085	0.844952
TraesCS1A02G015600		chr1A	8295508	8297343		Yes	-	-	0.75123	0.837405	0.697185	1.39299	1.34513	1.72675		-	Yes	-	70.3521	73.1298	81.963	0.461933	0.513472	0.540048
TraesCS1A02G015700		chr1A	8311562	8313243		-	-	-	-	-	-	-	-	-		-	Yes	-	6.47786	7.12246	6.16198	0.791808	0.757352	0.778151
TraesCS1A02G015900		chr1A	8325715	8329799		Yes	Yes	Yes	17.6347	15.2865	14.5101	0.508632	0.479647	0.520946		-	Yes	-	6.41569	5.8391	6.97788	0.784103	0.661544	0.592669
TraesCS1A02G016100		chr1A	8341907	8344730		-	-	-	0.844678	0.635	0.573226	1.34548	1.13629	1.44499		Yes	-	-	1.00562	0.826781	0.680731	1.36862	1.57447	1.46251
TraesCS1A02G016600		chr1A	9089751	9092824		-	-	-	-	-	-	-	-	-		-	Yes	-	6.69516	7.16745	8.69295	1.06665	1.21187	1.24876
TraesCS1A02G016800		chr1A	9103014	9104091		-	-	-	-	-	-	-	-	-		-	Yes	-	3.12585	2.829	3.31732	0.876582	0.863798	0.951722
TraesCS1A02G016900		chr1A	9104841	9110639		-	-	-	18.3983	17.7754	19.7405	0.383369	0.320056	0.347941		Yes	-	-	21.2684	20.4108	18.7996	0.449989	0.487378	0.417082
TraesCS1A02G017000		chr1A	9119143	9123202		-	-	-	2.98577	3.24872	3.35549	0.656689	0.698014	0.530784		Yes	Yes	Yes	2.26877	2.09942	2.4805	0.897956	0.817123	0.920746
TraesCS1A02G017700		chr1A	9232851	9236545		-	-	-	-	-	-	-	-	-		Yes	-	-	1.2857	1.50774	1.87976	1.62717	1.34574	1.24444
TraesCS1A02G017900		chr1A	9355372	9357968		Yes	Yes	Yes	21.557	16.7904	16.3591	0.745223	0.659054	0.846027		-	-	-	-	-	-	-	-	-
TraesCS1A02G018000		chr1A	9359231	9363721		Yes	Yes	Yes	3.45188	2.56086	2.70142	1.17894	1.16058	1.55642		-	-	-	-	-	-	-	-	-
TraesCS1A02G018400		chr1A	9543460	9548078		-	-	-	0.534133	0.665542	0.624897	1.53715	1.39669	1.55344		Yes	Yes	Yes	4.18563	3.70144	3.06676	0.898311	0.945727	0.894921
TraesCS1A02G018500		chr1A	9549076	9552128		-	Yes	-	1.85755	1.33076	1.34302	1.41716	1.09358	1.08714		-	-	-	-	-	-	-	-	-
TraesCS1A02G018600		chr1A	9553967	9556916		Yes	Yes	Yes	2.76171	2.18189	1.56615	0.982034	0.905379	0.97422		-	-	-	-	-	-	-	-	-
TraesCS1A02G018900		chr1A	9579534	9583651		-	-	-	7.37245	7.43614	8.44638	0.439949	0.410978	0.335585		-	Yes	-	7.98349	7.57394	8.10338	0.583169	0.57301	0.524312
TraesCS1A02G019200		chr1A	9642195	9644901		Yes	-	-	9.23701	9.54847	11.5466	0.43237	0.458866	0.446339		Yes	Yes	Yes	16.3539	15.5524	15.6006	0.45503	0.429359	0.462477
TraesCS1A02G020000		chr1A	9979714	9980736		-	Yes	-	4.49707	4.75971	4.62497	0.980978	1.004	0.996418		Yes	Yes	Yes	96.8173	107.25	106.839	0.67997	0.773726	0.642082
TraesCS1A02G020100		chr1A	9984176	9985446		-	-	-	-	-	-	-	-	-		Yes	Yes	Yes	1.62477	2.53902	4.15598	1.14584	1.09262	0.881069
TraesCS1A02G020300		chr1A	10047783	10050350		-	-	-	3.9094	4.08368	4.55214	0.647306	0.59683	0.562295		Yes	-	-	3.70588	3.67749	4.24888	0.782866	0.6649	0.573907
TraesCS1A02G020400		chr1A	10051720	10058221		Yes	-	-	1.22323	1.4881	1.69973	0.883951	0.811253	0.780636		Yes	Yes	Yes	2.31544	2.01026	2.61671	0.869124	0.946801	0.958663
TraesCS1A02G020600		chr1A	10069498	10072370		Yes	-	-	4.85995	4.58864	4.83681	0.546904	0.540274	0.525523		-	Yes	-	5.27764	4.97309	5.44328	0.701451	0.607505	0.649109
TraesCS1A02G020800		chr1A	10126424	10128313		-	-	-	-	-	-	-	-	-		Yes	Yes	Yes	2.65749	1.91987	0.944684	3.00207	3.58219	3.43046
TraesCS1A02G020900		chr1A	10132632	10133075		Yes	Yes	Yes	6.03333	5.39673	4.38454	0.675704	0.573255	0.75061		Yes	Yes	Yes	2.86476	2.15002	1.65665	1.2416	1.162	1.24885
TraesCS1A02G021100		chr1A	10150818	10152476		Yes	Yes	Yes	4.30625	4.08019	4.04823	0.547031	0.542469	0.624715		Yes	Yes	Yes	2.15927	2.32971	2.04314	0.972715	1.60951	1.11515
TraesCS1A02G021200		chr1A	10155551	10160312		Yes	-	-	15.7501	15.4432	13.3408	0.483857	0.528557	0.549554		Yes	-	-	8.60561	8.9273	9.43463	0.703213	0.627381	0.567428
TraesCS1A02G021400		chr1A	10210714	10211293		-	-	-	0.439838	0.489714	0.449216	1.45622	1.81436	1.69624		Yes	Yes	Yes	2.46132	2.59026	3.66834	1.39502	1.59402	1.00134
TraesCS1A02G022000		chr1A	10602386	10607440		-	-	-	-	0.348342	-	-	1.78736	-		Yes	Yes	Yes	3.73965	6.11397	7.10407	1.08155	1.10505	0.890004
TraesCS1A02G022500		chr1A	10969660	10972892		-	Yes	-	7.59055	6.93071	7.16263	0.904366	0.773858	0.846528		Yes	Yes	Yes	4.19517	4.34068	4.59578	1.06771	1.09128	1.03181
TraesCS1A02G022600		chr1A	11025585	11025879		Yes	Yes	Yes	1.8163	1.23351	1.29012	1.2581	1.08603	1.20172		-	Yes	-	3.71729	4.5871	3.57467	0.964926	0.864657	1.11339
TraesCS1A02G022700		chr1A	11229095	11231774		-	-	-	-	-	-	-	-	-		Yes	-	-	2.09492	1.95963	1.83054	1.01563	1.10345	1.11892
TraesCS1A02G023000		chr1A	11418293	11423385		-	-	-	-	-	-	-	-	-		Yes	-	-	2.35389	2.40198	2.1424	1.10203	1.30474	1.02423
TraesCS1A02G023300		chr1A	11554673	11556175		-	-	-	-	-	0.391508	-	-	1.94537		Yes	Yes	Yes	18.5945	25.8843	33.6834	0.496694	0.522943	0.534051
TraesCS1A02G023400		chr1A	11564200	11572148		Yes	-	-	3.77393	4.14517	4.06691	0.703363	0.612368	0.499727		Yes	Yes	Yes	4.07628	4.02645	3.55514	0.817498	0.786781	0.663222
TraesCS1A02G023700		chr1A	11643654	11644753		Yes	-	-	1.6387	1.51828	1.66101	0.999151	0.897185	0.857379		-	-	-	-	-	-	-	-	-
TraesCS1A02G024400		chr1A	12002939	12006839		Yes	-	-	1.02854	1.14183	1.25003	1.05459	1.11222	0.905334		-	-	-	-	-	-	-	-	-
TraesCS1A02G024500		chr1A	12089718	12093423		-	-	-	0.687116	0.605937	0.784093	1.47544	1.26358	1.42794		Yes	-	-	0.984962	0.79799	0.986826	1.60999	1.47127	1.4627
TraesCS1A02G024600		chr1A	12096371	12098518		-	-	-	1.68872	1.767	1.81562	0.856487	0.932723	1.00473		-	Yes	-	6.88362	8.15226	8.00438	0.596759	0.639432	0.495589
TraesCS1A02G024700		chr1A	12098618	12103881		Yes	-	-	13.2452	12.6862	13.8003	0.642429	0.514094	0.519781		Yes	Yes	Yes	3.46944	3.43884	3.88081	0.790492	0.88666	0.729246
TraesCS1A02G025100		chr1A	12141981	12144556		Yes	-	-	9.21058	10.2835	11.802	0.519523	0.433687	0.428861		Yes	Yes	Yes	11.7722	14.092	15.1195	0.469619	0.448316	0.382215
TraesCS1A02G025500		chr1A	12207569	12216167		Yes	Yes	Yes	8.07669	7.65509	6.39233	1.18252	1.0173	1.17189		Yes	Yes	Yes	1.37929	1.09167	0.542197	1.46834	1.64519	1.75571
TraesCS1A02G025600		chr1A	12303354	12311465		Yes	Yes	Yes	14.4719	15.9638	14.7591	0.844753	0.824529	0.867457		Yes	Yes	Yes	8.05042	5.98069	5.51494	1.0121	1.12603	1.08767
TraesCS1A02G025900		chr1A	12363666	12369892		Yes	-	-	4.0776	4.58924	4.84069	0.538797	0.424534	0.694075		Yes	Yes	Yes	5.37266	5.59028	5.36673	0.718179	0.656828	0.644007
TraesCS1A02G026200		chr1A	12502526	12507052		-	-	-	51.1461	46.3281	50.3897	0.660994	0.643314	0.602605		Yes	Yes	Yes	44.6828	36.4638	35.0593	0.921015	0.820937	0.866807
TraesCS1A02G026400		chr1A	12585035	12592665		-	Yes	-	9.95437	9.64174	11.0099	0.788287	0.793884	0.946674		-	Yes	-	3.97656	3.40183	4.11331	1.08863	1.01328	1.01583
TraesCS1A02G026800		chr1A	12698221	12698445		-	Yes	-	1.96139	3.37663	2.79473	3.22068	3.26963	3.20739		-	Yes	-	2.26772	4.26461	2.97246	3.01848	3.1936	2.62687
TraesCS1A02G027200		chr1A	12915087	12917028		-	-	-	6.67553	7.53625	8.61978	0.458074	0.400709	0.486255		Yes	Yes	Yes	5.98428	5.84834	7.14665	0.479036	0.569569	0.503415
TraesCS1A02G027300		chr1A	12918575	12920144		-	Yes	-	5.96477	7.16242	5.42784	0.875978	0.738538	0.849262		Yes	Yes	Yes	12.7446	12.3129	9.74411	0.822449	0.680927	0.772116
TraesCS1A02G028500		chr1A	13346605	13352572		-	-	-	1.17987	1.44943	1.50419	1.04653	1.03683	1.10503		Yes	-	-	1.21507	1.21149	1.22037	1.44835	1.94384	1.28229
TraesCS1A02G028700		chr1A	13452339	13458303		Yes	-	-	1.31663	1.61455	1.6779	1.5551	1.44454	1.42234		-	-	-	-	-	-	-	-	-
TraesCS1A02G029200		chr1A	13669902	13676212		Yes	-	-	3.12977	3.26565	3.98564	0.996569	0.747592	0.741016		Yes	Yes	Yes	3.36179	3.73136	4.25248	0.793532	0.766278	0.64761
TraesCS1A02G029300		chr1A	13762566	13768572		-	Yes	-	67.1804	64.9988	66.373	0.58267	0.5876	0.637721		Yes	Yes	Yes	88.7894	82.4578	67.681	0.706643	0.729641	0.774357
TraesCS1A02G029800		chr1A	13861191	13862962		-	-	-	25.9475	27.6599	24.8427	0.626709	0.591647	0.622116		-	Yes	-	43.7168	43.7103	38.858	0.538769	0.54836	0.491592
TraesCS1A02G030000		chr1A	13979250	13980335		Yes	Yes	Yes	141.374	124.659	125.775	0.545766	0.500129	0.578808		Yes	Yes	Yes	0.49211	0.832251	0.934906	1.9912	2.34871	2.30551
TraesCS1A02G030400		chr1A	14108111	14110412		Yes	Yes	Yes	6.35053	5.56066	5.5447	0.781	0.594534	0.630076		-	-	-	-	-	-	-	-	-
TraesCS1A02G030600		chr1A	14143597	14145914		-	-	-	22.0897	22.942	23.5982	0.461194	0.391031	0.393243		Yes	Yes	Yes	22.063	23.2821	26.9743	0.446736	0.454773	0.479665
TraesCS1A02G030700		chr1A	14160322	14163255		Yes	Yes	Yes	14.1205	13.7433	13.4022	0.584083	0.608791	0.610695		-	Yes	-	3.30699	3.25498	3.34783	1.23478	0.977964	1.056
TraesCS1A02G030900		chr1A	14253391	14257167		-	Yes	-	6.41581	6.72824	6.63389	0.876169	0.892093	0.902071		Yes	Yes	Yes	5.36873	5.33192	6.26659	1.09844	1.09723	1.12248
TraesCS1A02G031100		chr1A	14467959	14469389		Yes	Yes	Yes	8.36758	9.94462	9.16787	1.63627	1.24113	1.03958		Yes	-	-	0.407783	0.424028	0.715749	1.98465	1.92654	1.81936
TraesCS1A02G031200		chr1A	14504224	14507920		Yes	Yes	Yes	10.7145	11.6574	10.1926	0.647089	0.652196	0.763241		-	Yes	-	32.0638	31.3849	26.6165	0.70168	0.710263	0.672448
TraesCS1A02G032800		chr1A	15324612	15326204		Yes	Yes	Yes	3.24243	3.18678	1.16336	2.00051	1.85848	1.85482		-	-	-	-	-	-	-	-	-
TraesCS1A02G032900		chr1A	15343594	15348515		Yes	Yes	Yes	28.7293	24.9958	19.861	1.75255	1.61531	1.71415		Yes	Yes	Yes	18.4584	17.4452	12.0498	1.82515	1.73996	1.53652
TraesCS1A02G033000		chr1A	15430220	15437374		-	-	-	7.17309	7.52646	7.49778	0.407318	0.377656	0.383966		-	Yes	-	6.03989	5.91094	6.58619	0.615464	0.756087	0.559017
TraesCS1A02G033100		chr1A	15438125	15441465		-	-	-	13.4379	14.3693	16.6143	0.376043	0.337133	0.312389		Yes	-	-	18.2223	17.9077	18.141	0.388329	0.296319	0.28093
TraesCS1A02G033200		chr1A	15516524	15518456		Yes	Yes	Yes	3.61418	3.48797	3.22176	0.838814	0.980852	0.946683		-	Yes	-	2.79108	2.34087	2.56768	1.15588	1.05004	0.861952
TraesCS1A02G033500		chr1A	16388445	16391082		-	Yes	-	397.762	414.628	409.299	0.424463	0.386991	0.451267		Yes	Yes	Yes	2.63255	3.2257	3.34527	1.09398	1.19079	0.889354
TraesCS1A02G033600		chr1A	16407008	16410201		-	Yes	-	61.8464	65.171	65.8316	0.519977	0.48699	0.531182		-	Yes	-	4.2885	4.62112	4.36974	0.926467	1.13298	0.854888
TraesCS1A02G033700		chr1A	16425345	16428037		-	-	-	-	-	-	-	-	-		-	Yes	-	9.15084	8.97469	8.64352	0.748915	0.620526	0.829666
TraesCS1A02G034000		chr1A	16838175	16839176		-	-	-	-	-	-	-	-	-		-	Yes	-	1.7501	1.88073	1.35958	1.12915	0.898165	0.96991
TraesCS1A02G034300		chr1A	16931434	16934477		-	-	-	7.09225	8.05462	7.81171	0.603065	0.448002	0.488766		Yes	Yes	Yes	6.25109	6.10438	7.07436	0.672435	0.576354	0.581355
TraesCS1A02G035000		chr1A	18289937	18293936		-	Yes	-	3.84889	4.36423	4.24985	0.693943	0.725247	0.746748		Yes	Yes	Yes	4.12583	4.51915	5.23203	0.653592	0.768877	0.650939
TraesCS1A02G035200		chr1A	18460513	18462491		Yes	-	-	2.49007	2.57896	2.72392	0.662487	0.592732	0.663315		Yes	Yes	Yes	4.22733	4.31072	4.58249	0.576573	0.595589	0.550974
TraesCS1A02G035300		chr1A	18486339	18489620		-	-	-	0.678567	0.565992	0.923134	1.12371	1.10557	2.27933		-	Yes	-	1.91659	1.34003	1.36169	1.22727	1.22154	0.822649
TraesCS1A02G035600		chr1A	19062157	19063423		-	Yes	-	3.72501	3.53702	3.15989	0.583693	0.633584	0.643516		Yes	Yes	Yes	13.2644	11.8432	9.99279	0.576175	0.596098	0.569785
TraesCS1A02G035700		chr1A	19891661	19894572		-	-	-	-	-	-	-	-	-		Yes	Yes	Yes	10.6242	8.74801	8.53864	0.761685	0.65616	0.619049
TraesCS1A02G035800		chr1A	19895297	19897721		-	-	-	70.8282	73.026	67.8493	0.320388	0.277101	0.308306		-	Yes	-	100.67	105.829	102.442	0.583741	0.569246	0.570057
TraesCS1A02G035900		chr1A	19929936	19933705		Yes	Yes	Yes	2.03596	2.7151	2.84783	0.938573	0.849844	0.846715		-	-	-	-	-	-	-	-	-
TraesCS1A02G036100		chr1A	20091099	20094848		Yes	-	-	8.62405	9.31403	9.27901	0.665407	0.648669	0.629859		-	-	-	7.48119	7.41102	7.65427	0.490959	0.540207	0.497546
TraesCS1A02G036300		chr1A	20179711	20183942		-	-	-	1.06225	1.17086	1.17554	0.912053	0.824488	1.05731		Yes	Yes	Yes	1.34303	1.42027	2.18728	1.13225	1.02283	0.93757
TraesCS1A02G036700		chr1A	20415992	20419223		-	-	-	-	-	-	-	-	-		Yes	-	-	1.32328	1.33957	1.09106	1.10501	1.09572	0.874639
TraesCS1A02G037300		chr1A	20888601	20889881		-	-	-	-	0.470484	0.614525	-	1.59161	2.54706		Yes	-	-	0.704122	0.862723	0.74031	1.29638	1.8076	1.39237
TraesCS1A02G037400		chr1A	20893785	20898393		-	Yes	-	3.72722	3.91531	3.36999	0.605617	0.643288	0.713686		-	-	-	-	-	-	-	-	-
TraesCS1A02G037700		chr1A	20924887	20932614		-	-	-	0.4047	0.503304	0.410674	1.49672	1.99167	1.38128		-	Yes	-	25.6626	24.4693	24.8801	0.939157	0.829805	0.649831
TraesCS1A02G037800		chr1A	20935423	20938081		-	-	-	0.912844	0.944613	0.653283	1.16891	1.69591	2.10332		Yes	Yes	Yes	37.1881	39.3077	46.1443	0.485053	0.497301	0.403347
TraesCS1A02G037900		chr1A	20977276	20980680		-	Yes	-	27.7505	27.4757	28.3944	0.439562	0.438182	0.512757		Yes	Yes	Yes	7.8381	8.44865	10.7841	0.848629	0.665348	0.599079
TraesCS1A02G038100		chr1A	20998069	20998918		Yes	Yes	Yes	21.524	23.2664	22.0482	0.993629	0.788951	0.770379		-	Yes	-	36.9723	39.5668	33.1312	0.661905	0.651266	0.68903
TraesCS1A02G038200		chr1A	21022731	21023627		-	Yes	-	42.5833	46.656	43.4024	0.871388	0.602406	0.644817		Yes	Yes	Yes	93.565	93.0042	77.8678	0.47076	0.451557	0.492028
TraesCS1A02G038400		chr1A	21034869	21049127		Yes	Yes	Yes	3.56509	4.20623	5.08053	0.770833	0.751573	0.769145		-	Yes	-	4.65729	4.85874	4.62734	0.758324	0.581239	0.677428
TraesCS1A02G039100		chr1A	21281532	21285458		-	-	-	1.69409	1.94942	2.05323	1.15667	1.13757	1.12773		Yes	Yes	Yes	1.44313	1.26065	1.43868	1.27257	1.17244	1.25436
TraesCS1A02G039200		chr1A	21322246	21335307		-	-	-	5.2223	5.39715	5.9403	0.475101	0.49309	0.513349		-	Yes	-	4.55389	4.64748	4.51643	0.766229	0.594495	0.541431
TraesCS1A02G039800		chr1A	21985330	21987056		Yes	Yes	Yes	3.57083	3.15372	2.48842	0.732226	0.661218	0.87233		-	-	-	1.79089	1.99585	1.95764	1.11505	1.22281	1.28457
TraesCS1A02G040200		chr1A	22271358	22271960		-	-	-	-	-	-	-	-	-		Yes	Yes	Yes	3.10387	2.77275	1.49249	1.15642	1.0594	1.48141
TraesCS1A02G040300		chr1A	22282323	22283710		-	-	-	-	-	-	-	-	-		Yes	Yes	Yes	44.9926	41.2461	30.771	0.53081	0.532986	0.53199
TraesCS1A02G040400		chr1A	22287727	22291553		Yes	-	-	1.82757	1.96992	1.93132	0.750878	0.687007	0.772177		-	Yes	-	5.62466	4.94689	5.68632	0.724137	0.833641	0.714375
TraesCS1A02G040600		chr1A	22294835	22301515		-	-	-	59.7632	57.1054	59.9496	0.364957	0.293793	0.450236		Yes	-	-	21.4637	23.5664	22.4315	0.513554	0.616121	0.466811
TraesCS1A02G041300		chr1A	22633431	22634135		-	Yes	-	37.6798	44.5562	41.5502	0.846721	0.861267	0.863625		Yes	Yes	Yes	25.4354	31.3289	29.795	1.0499	1.06822	0.715297
TraesCS1A02G041400		chr1A	22656561	22657221		-	Yes	-	58.7042	65.7984	50.367	0.882573	0.922222	0.793844		Yes	Yes	Yes	1.61708	2.47525	2.24599	1.97508	2.93759	1.67174
TraesCS1A02G041500		chr1A	22657694	22657945		-	Yes	-	1.96017	2.23117	1.64067	1.22143	1.34857	1.18232		-	-	-	-	-	-	-	-	-
TraesCS1A02G041700		chr1A	22755453	22757185		-	-	-	-	-	-	-	-	-		-	Yes	-	18.1686	18.8416	14.1935	1.04392	1.20932	1.11093
TraesCS1A02G042700		chr1A	23339466	23340670		Yes	Yes	Yes	8.51092	9.14339	10.7957	0.593463	0.530487	0.667629		-	Yes	-	53.9827	52.5609	55.2968	0.721808	0.700799	0.639437
TraesCS1A02G043100		chr1A	23856568	23858030		-	-	-	-	-	-	-	-	-		Yes	Yes	Yes	3.74641	3.772	4.87521	0.800644	0.573917	0.535907
TraesCS1A02G043200		chr1A	23966033	23970147		-	-	-	26.2193	25.5992	26.378	0.307114	0.279767	0.260435		Yes	Yes	Yes	29.1771	30.6544	30.9944	0.479946	0.459491	0.417385
TraesCS1A02G043300		chr1A	24077190	24078148		-	-	-	-	-	-	-	-	-		Yes	Yes	Yes	3.19475	3.60006	4.46416	0.824381	0.737198	0.6676
TraesCS1A02G043400		chr1A	24132681	24140137		Yes	-	-	1.02491	1.08934	1.20725	1.43217	0.99722	0.966459		-	-	-	0.531456	0.450702	0.611125	1.49321	1.58212	1.38186
TraesCS1A02G043600		chr1A	24319202	24321534		-	-	-	16.3602	14.8795	16.1469	0.405996	0.312567	0.303631		Yes	Yes	Yes	14.2966	14.4089	15.2407	0.493948	0.463854	0.423694
TraesCS1A02G043900		chr1A	24336654	24340722		-	-	-	0.51864	0.494285	0.762182	1.37615	1.96857	1.56249		Yes	Yes	Yes	46.383	45.4292	43.7608	0.517727	0.480207	0.481707
TraesCS1A02G044200		chr1A	24943572	24946478		Yes	-	-	7.05808	8.0598	8.44681	0.418124	0.46504	0.377897		Yes	-	-	7.37763	7.52899	7.95285	0.471136	0.556683	0.435033
TraesCS1A02G044500		chr1A	25539196	25545141		-	-	-	16.2664	16.6997	17.5038	0.35096	0.34037	0.312765		-	Yes	-	16.5661	14.9303	17.2236	0.523138	0.512333	0.508804
TraesCS1A02G044600		chr1A	25545346	25546110		-	-	-	4.15882	4.88885	4.59517	0.519912	0.488811	0.511567		Yes	Yes	Yes	4.35974	5.31419	5.99427	0.774844	0.739392	0.580734
TraesCS1A02G044800		chr1A	25701413	25709229		-	-	-	5.10245	5.62563	6.45183	0.427336	0.439349	0.40756		Yes	Yes	Yes	5.67489	5.59532	6.2089	0.651518	0.564762	0.475594
TraesCS1A02G045300		chr1A	26958795	26962687		-	-	-	16.8096	16.6686	17.3676	0.413728	0.426376	0.430358		Yes	Yes	Yes	27.2807	23.5506	24.5634	0.494378	0.470463	0.441704
TraesCS1A02G045400		chr1A	26965566	26971307		-	-	-	16.7842	17.469	17.3087	0.304203	0.29493	0.30528		Yes	-	-	10.0127	8.89	8.39884	0.525467	0.455702	0.433772
TraesCS1A02G045700		chr1A	27249156	27253937		Yes	Yes	Yes	64.6771	75.1177	80.0125	0.429028	0.40498	0.477747		-	Yes	-	23.008	23.4056	25.8756	0.6916	0.727515	0.72958
TraesCS1A02G045800		chr1A	27258231	27261032		Yes	-	-	31.4399	33.5778	33.2426	0.457357	0.454189	0.469214		-	-	-	56.9397	52.7144	53.21	0.491349	0.455556	0.489688
TraesCS1A02G046300		chr1A	27752743	27757377		-	-	-	2.12899	2.0709	2.37433	0.838273	0.703166	0.723801		Yes	-	-	1.38316	1.17762	1.68836	0.999842	1.07332	0.892076
TraesCS1A02G046400		chr1A	28360781	28364801		Yes	Yes	Yes	18.5694	18.1467	17.4084	0.639433	0.559153	0.542354		-	-	-	0.643949	0.639586	0.489784	1.29853	1.78482	1.73133
TraesCS1A02G046500		chr1A	28610241	28620653		-	-	-	8.47968	9.10297	10.6098	0.765129	0.791764	0.792986		Yes	Yes	Yes	6.33023	5.97681	6.07653	1.00776	1.0517	0.89743
TraesCS1A02G046600		chr1A	28623296	28626864		Yes	Yes	Yes	14.31	14.6126	16.7039	0.485692	0.556549	0.46791		-	Yes	-	11.1906	10.8009	11.5072	0.753508	0.667499	0.594373
TraesCS1A02G046800		chr1A	28708159	28710773		-	-	-	6.06586	6.00728	5.66772	0.64793	0.470799	0.514478		-	Yes	-	3.29756	3.28817	3.63195	0.588967	0.597702	0.62679
TraesCS1A02G047000		chr1A	28757074	28763216		-	-	-	23.2536	23.9247	24.9518	0.403863	0.379219	0.35482		-	Yes	-	33.8074	31.5335	36.0361	0.614522	0.570064	0.637228
TraesCS1A02G047400		chr1A	29280019	29280854		-	-	-	0.470568	0.87132	1.29667	2.29617	1.87187	1.64892		Yes	-	-	0.636241	0.447913	0.937676	1.64326	1.50699	1.61229
TraesCS1A02G047500		chr1A	29607628	29612226		-	-	-	5.62906	6.12851	6.32443	0.406535	0.381698	0.444403		-	Yes	-	6.90362	6.28082	6.35921	0.581598	0.636311	0.469755
TraesCS1A02G048000		chr1A	29796504	29798640		-	-	-	-	-	-	-	-	-		Yes	Yes	Yes	5.91097	6.19342	7.6428	0.752516	0.766986	0.514199
TraesCS1A02G048100		chr1A	29800306	29802574		-	-	-	-	-	-	-	-	-		-	Yes	-	7.6499	7.7375	7.14198	0.792767	0.598879	0.609505
TraesCS1A02G048700		chr1A	30196596	30197675		-	Yes	-	5.58222	6.35536	5.52348	0.870856	0.806869	0.870857		-	Yes	-	18.8924	23.0722	20.9269	0.734628	0.752451	0.73552
TraesCS1A02G049100		chr1A	30771909	30773077		Yes	-	-	1.37336	1.02152	0.849121	1.71249	1.63526	1.9573		Yes	Yes	Yes	34.1431	29.5725	21.7666	0.728634	0.700247	0.713828
TraesCS1A02G049300		chr1A	30793888	30805600		Yes	-	-	6.65937	7.13774	8.04299	0.585715	0.533861	0.524036		Yes	Yes	Yes	4.69551	4.7573	5.05419	0.72851	0.655391	0.552062
TraesCS1A02G049600		chr1A	31252424	31254526		-	Yes	-	9.90486	10.7532	10.5175	0.751665	0.661664	0.591914		Yes	Yes	Yes	4.4381	3.97666	3.22982	0.880746	0.929664	0.806494
TraesCS1A02G049700		chr1A	31778440	31781938		-	-	-	14.1237	14.0169	16.8742	0.404067	0.347758	0.353664		-	Yes	-	13.0061	12.3571	13.4602	0.575348	0.609754	0.546602
TraesCS1A02G050100		chr1A	32084707	32089178		Yes	-	-	7.83584	8.56565	9.54474	0.469875	0.452932	0.388407		Yes	-	-	21.1929	23.5556	20.1573	0.369511	0.412212	0.364846
TraesCS1A02G050400		chr1A	32260043	32262299		-	-	-	-	-	0.362992	-	-	2.22408		Yes	Yes	Yes	8.42831	7.15649	7.52433	0.753237	0.857624	0.743874
TraesCS1A02G050600		chr1A	32291317	32292106		Yes	-	-	1.16265	1.76	1.86316	1.43242	1.1672	1.20021		-	-	-	-	-	-	-	-	-
TraesCS1A02G050900		chr1A	32454117	32455183		-	Yes	-	9.26672	10.9245	7.37438	1.18982	0.969718	0.94924		Yes	Yes	Yes	13.3496	14.2765	7.15262	0.992412	1.34862	0.954371
TraesCS1A02G051300		chr1A	32890600	32894593		Yes	-	-	16.7162	17.5195	18.621	0.450746	0.366787	0.402892		-	Yes	-	18.9513	16.6759	21.0555	0.635336	0.653983	0.575469
TraesCS1A02G051500		chr1A	33019233	33022457		-	-	-	18.6437	18.1285	20.1354	0.541263	0.509833	0.558757		Yes	Yes	Yes	21.1221	20.9457	22.778	0.873484	0.76577	0.825756
TraesCS1A02G051700		chr1A	33370767	33373330		-	-	-	228.049	223.251	224.096	0.402087	0.393617	0.386619		Yes	Yes	Yes	401.345	387.958	334.705	0.619478	0.526049	0.510734
TraesCS1A02G051800		chr1A	33373636	33374973		-	-	-	0.481819	0.399802	0.608116	1.4973	1.50882	1.63883		-	Yes	-	1.41786	1.72294	1.21073	1.52702	1.12678	1.20197
TraesCS1A02G051900		chr1A	33375413	33377767		-	-	-	8.86728	9.02993	9.3579	0.364772	0.341279	0.310154		-	Yes	-	16.2481	16.1636	14.646	0.59091	0.425386	0.412281
TraesCS1A02G052100		chr1A	34146866	34149852		Yes	Yes	Yes	6.49466	6.61552	7.46832	0.70457	0.512755	0.533008		-	Yes	-	3.74239	3.4303	4.12086	0.861177	0.888746	0.804899
TraesCS1A02G052200		chr1A	34158622	34174068		-	-	-	18.0889	17.28	18.073	0.418608	0.384589	0.425033		-	Yes	-	20.3557	18.0678	20.8605	0.638756	0.76425	0.663801
TraesCS1A02G052300		chr1A	34406139	34410005		-	-	-	7.35697	8.14281	7.01858	0.470528	0.404129	0.4531		Yes	Yes	Yes	2.85162	3.38137	3.78474	0.827871	0.700144	0.524073
TraesCS1A02G054000		chr1A	35542718	35543825		-	-	-	3.22087	3.20562	2.98347	0.563973	0.540915	0.61915		Yes	-	-	1.59496	1.70946	2.14197	0.967284	0.812997	0.7936
TraesCS1A02G054300		chr1A	35931964	35936127		-	Yes	-	1.79035	1.61949	1.90604	0.879358	0.819478	1.04382		-	Yes	-	2.06678	1.7767	2.24649	1.05763	1.11788	0.900003
TraesCS1A02G054400		chr1A	35937734	35944326		Yes	-	-	4.25882	4.95073	5.37056	0.758442	0.559014	0.597903		Yes	Yes	Yes	2.57652	2.59077	3.34237	0.990659	0.848595	0.726516
TraesCS1A02G054900		chr1A	36267235	36271054		Yes	Yes	Yes	5.54837	5.67034	6.4309	0.565092	0.474689	0.477198		Yes	Yes	Yes	4.78711	3.81245	4.09345	0.831918	0.828693	0.79068
TraesCS1A02G055000		chr1A	36271325	36278335		Yes	-	-	12.4946	11.6435	11.3251	0.504813	0.428391	0.431986		-	-	-	1.45084	1.54815	1.35321	1.26285	1.28681	0.975773
TraesCS1A02G055200		chr1A	36278601	36281199		-	-	-	21.289	21.153	20.1782	0.332732	0.314064	0.350543		Yes	Yes	Yes	17.6049	17.047	14.9848	0.430364	0.436236	0.374489
TraesCS1A02G055400		chr1A	36561933	36569908		-	-	-	16.6882	17.0673	17.5729	0.403854	0.290275	0.347812		Yes	Yes	Yes	3.23332	2.93087	3.30036	0.795353	0.970689	1.30352
TraesCS1A02G056200		chr1A	36765924	36766338		Yes	-	-	1.94958	1.405	1.21072	1.41214	0.986777	1.17403		-	-	-	-	-	-	-	-	-
TraesCS1A02G056400		chr1A	36769724	36770407		-	-	-	0.735371	0.895338	0.613401	1.1712	1.03739	1.19433		Yes	Yes	Yes	12.8662	11.4919	8.78516	0.957161	0.845063	0.8912
TraesCS1A02G056500		chr1A	36772140	36774424		-	-	-	12.1954	11.8345	12.8818	0.379365	0.316199	0.328607		Yes	-	-	16.9371	16.6191	15.8403	0.321182	0.286629	0.338091
TraesCS1A02G056600		chr1A	36776373	36780640		Yes	Yes	Yes	6.69533	6.8033	4.52842	0.625336	0.618346	0.567801		-	Yes	-	5.54531	5.21814	5.02519	0.750812	0.7499	0.674315
TraesCS1A02G056700		chr1A	36794163	36794789		Yes	-	-	0.927945	0.759462	0.656285	1.60863	1.37152	1.45818		-	-	-	-	0.477845	0.352287	-	1.67141	1.79571
TraesCS1A02G056900		chr1A	36839920	36840861		-	Yes	-	2.86064	2.57405	3.03385	0.866333	0.764332	1.01531		Yes	Yes	Yes	223.627	228.658	194.058	0.60643	0.64395	0.613586
TraesCS1A02G057100		chr1A	37465850	37468260		Yes	-	-	1.694	1.67148	1.90845	0.835973	0.673507	0.754906		Yes	-	-	1.16941	1.35995	1.35565	0.939613	1.26668	0.842535
TraesCS1A02G057200		chr1A	37478206	37481881		-	-	-	39.9013	40.1121	42.244	0.450372	0.396283	0.4757		Yes	-	-	0.767246	0.97798	0.83902	1.19092	1.47034	1.20652
TraesCS1A02G057900		chr1A	38366744	38368653		-	-	-	0.787814	0.849429	0.846648	1.06475	0.873824	0.918727		Yes	Yes	Yes	2.62299	2.64062	2.94883	0.867807	0.893986	0.608216
TraesCS1A02G058200		chr1A	38711994	38715061		Yes	-	-	0.818135	1.0229	0.552594	1.56351	1.78064	1.93904		-	-	-	-	-	-	-	-	-
TraesCS1A02G058300		chr1A	38717933	38718693		Yes	-	-	1.8776	1.85865	2.02244	0.793655	0.694377	0.778464		-	Yes	-	2.32754	2.81573	2.66827	0.800174	0.803494	0.695845
TraesCS1A02G058400		chr1A	38728807	38733500		-	Yes	-	15.7036	15.9937	17.0143	0.556065	0.582606	0.560533		-	Yes	-	37.6006	36.0627	36.3288	0.532246	0.545864	0.510329
TraesCS1A02G058600		chr1A	39402527	39408383		-	Yes	-	3.06412	3.49718	3.28287	0.916931	0.772889	0.685033		-	Yes	-	5.33858	5.48334	5.09936	0.748364	0.650428	0.626222
TraesCS1A02G058700		chr1A	39402991	39410027		-	-	-	1.00067	1.20236	0.993737	0.943264	0.835487	0.866725		Yes	Yes	Yes	12.1562	11.9063	9.60888	0.493853	0.483954	0.391283
TraesCS1A02G058900		chr1A	39649614	39651876		-	Yes	-	2.31949	2.39852	2.1786	0.787819	0.798534	0.796115		-	-	-	-	-	-	-	-	-
TraesCS1A02G059100		chr1A	39870474	39872241		Yes	Yes	Yes	5.46166	5.681	6.39533	0.988029	0.704142	0.643137		-	-	-	28.2349	29.8988	29.8842	0.564789	0.664058	0.554575
TraesCS1A02G059200		chr1A	39892912	39894955		Yes	Yes	Yes	2.34688	1.96377	1.67247	0.860109	0.825713	1.05432		Yes	Yes	Yes	7.27698	7.15578	6.65104	0.567468	0.668129	0.490697
TraesCS1A02G060100		chr1A	41357284	41362423		Yes	-	-	3.61228	3.65348	4.00313	0.75795	0.61476	0.698485		-	-	-	2.56215	2.22121	2.94152	1.40853	0.867485	0.891039
TraesCS1A02G060600		chr1A	41740301	41745063		Yes	Yes	Yes	1.72079	2.066	2.1585	1.08325	0.811263	1.13195		Yes	-	-	0.990762	1.21783	1.45643	1.05789	0.976561	0.926166
TraesCS1A02G060700		chr1A	41747501	41750050		Yes	-	-	7.00073	7.87132	9.2708	0.604664	0.515218	0.605673		-	Yes	-	12.9341	10.9809	12.9745	0.561183	0.55544	0.553657
TraesCS1A02G061700		chr1A	42251606	42256435		-	Yes	-	6.81007	7.16326	6.833	0.64087	0.673214	0.626518		-	-	-	-	-	-	-	-	-
TraesCS1A02G062100		chr1A	42546063	42550350		-	-	-	31.8158	32.8246	34.8899	0.297258	0.257627	0.274642		-	Yes	-	53.4558	47.9428	41.3991	0.413464	0.395036	0.309353
TraesCS1A02G063500		chr1A	44406439	44407943		Yes	-	-	4.20401	4.1931	4.67078	0.536665	0.451211	0.54327		Yes	-	-	0.789808	0.815927	1.1148	1.21737	1.07239	1.14884
TraesCS1A02G063600		chr1A	44408101	44412013		Yes	-	-	1.49557	1.7634	1.50261	1.01944	0.740208	0.715485		Yes	-	-	1.01353	0.863949	1.2202	0.986417	1.16696	1.0367
TraesCS1A02G064000		chr1A	45543088	45548553		-	-	-	19.6105	19.2015	18.3685	0.434542	0.346649	0.370749		-	Yes	-	22.1025	20.6463	25.6991	0.513303	0.508564	0.453236
TraesCS1A02G064900		chr1A	47201867	47207696		-	-	-	0.507931	0.536722	0.502136	1.19042	1.12675	1.12985		-	Yes	-	5.11039	5.04433	5.82637	0.736342	0.621072	0.572354
TraesCS1A02G065300		chr1A	47578260	47587723		-	Yes	-	11.2924	10.3713	11.2149	0.658181	0.464311	0.48447		-	Yes	-	18.6826	16.3831	17.1677	0.746511	0.72603	0.650486
TraesCS1A02G065400		chr1A	47799453	47806227		Yes	Yes	Yes	2.55279	2.81357	2.16546	0.830236	0.657285	0.928488		-	Yes	-	5.77993	6.48203	6.50295	0.637937	0.714522	0.56558
TraesCS1A02G065600		chr1A	47823749	47827916		-	-	-	1.72112	1.86453	2.1835	1.0167	0.915878	0.828765		-	Yes	-	4.1132	3.78192	3.61838	0.923252	0.796175	0.766906
TraesCS1A02G065700		chr1A	48575894	48591514		-	-	-	15.8693	15.4896	16.3619	0.444335	0.411938	0.417946		Yes	Yes	Yes	23.5912	22.2404	23.6947	0.514027	0.478105	0.481964
TraesCS1A02G066200		chr1A	48783668	48786472		-	-	-	2.95502	2.80489	2.81181	0.75793	0.663897	0.814453		Yes	-	-	1.24049	1.33357	1.35723	1.12621	1.02971	0.907587
TraesCS1A02G066300		chr1A	48966062	48979283		Yes	-	-	2.02255	2.18824	1.81209	1.0376	1.12228	1.17316		Yes	Yes	Yes	5.49464	4.54822	4.5448	0.968832	0.993732	0.968719
TraesCS1A02G066400		chr1A	48979589	48982811		Yes	-	-	49.39	49.4387	45.2766	0.473877	0.372047	0.472148		-	Yes	-	2.46552	2.48745	2.35778	0.96907	1.01627	0.974791
TraesCS1A02G066700		chr1A	49096241	49100322		-	Yes	-	15.3759	14.6028	14.6925	0.79346	0.690174	0.740912		Yes	Yes	Yes	22.9945	21.2316	13.9661	0.585432	0.652071	0.557801
TraesCS1A02G066900		chr1A	49149510	49154022		-	Yes	-	176.1	173.371	154.571	0.3747	0.320265	0.354254		Yes	Yes	Yes	23.1011	16.9848	13.7885	0.489851	0.579661	0.514264
TraesCS1A02G067300		chr1A	49269259	49288855		Yes	Yes	Yes	4.9103	5.10095	5.74047	0.700285	0.654992	0.539535		-	Yes	-	6.20234	5.36222	6.6782	0.799287	0.838835	0.735059
TraesCS1A02G067900		chr1A	49361011	49363692		Yes	Yes	Yes	3.1733	3.4566	4.00566	0.73595	0.724372	0.621003		Yes	-	-	16.9627	15.1447	15.4009	0.543508	0.430543	0.452906
TraesCS1A02G068000		chr1A	49365311	49367228		Yes	-	-	8.94965	9.83092	10.4787	0.431727	0.355265	0.352536		Yes	-	-	9.36053	9.54634	10.4741	0.437649	0.421394	0.371372
TraesCS1A02G068400		chr1A	49896641	49897878		Yes	-	-	2.41577	2.56373	2.27925	0.952814	0.790653	0.725005		-	-	-	0.55949	0.500906	0.55465	1.29058	1.48691	1.65911
TraesCS1A02G069300		chr1A	51700021	51707185		Yes	-	-	11.02	10.0152	9.37197	0.509693	0.409856	0.439474		Yes	-	-	21.2126	19.5712	19.0066	0.455472	0.556197	0.491264
TraesCS1A02G069500		chr1A	52228530	52232086		-	-	-	0.957814	1.16513	0.983003	0.987204	1.03138	0.867546		Yes	-	-	1.56396	1.1596	0.937835	2.02335	1.30112	1.32468
TraesCS1A02G069600		chr1A	52235911	52238246		-	-	-	91.5228	89.488	89.1925	0.431143	0.459946	0.354452		-	Yes	-	135.782	119.82	122.864	0.467069	0.486058	0.449709
TraesCS1A02G069700		chr1A	52453835	52459566		-	-	-	1.25023	1.41088	1.35132	1.60163	1.46607	1.3948		Yes	-	-	1.40106	1.43383	1.79596	1.59662	1.63974	1.30575
TraesCS1A02G069900		chr1A	52519641	52520791		Yes	-	-	17.1275	17.31	17.0797	0.391422	0.359416	0.384132		-	-	-	-	-	-	-	-	-
TraesCS1A02G070300		chr1A	53032274	53037595		-	-	-	4.92342	5.48246	5.8963	0.560475	0.410126	0.457186		Yes	-	-	8.2196	8.36285	8.73313	0.475212	0.401934	0.342859
TraesCS1A02G070400		chr1A	53187274	53189460		Yes	Yes	Yes	16.4878	14.7678	13.1936	0.612392	0.644179	0.679864		-	Yes	-	17.275	17.3054	16.2533	0.451746	0.470182	0.509476
TraesCS1A02G070500		chr1A	53436194	53438543		Yes	Yes	Yes	17.2177	17.4977	12.6174	0.846421	0.729572	0.746966		Yes	-	-	3.3879	3.57584	3.96086	0.916205	0.781479	0.74755
TraesCS1A02G070600		chr1A	53454198	53457285		-	-	-	4.10469	3.79186	3.47789	0.979238	0.667285	0.668474		-	Yes	-	11.895	13.3547	10.979	0.62386	0.62488	0.448974
TraesCS1A02G070900		chr1A	53674142	53677477		-	-	-	0.549631	0.584059	0.561634	1.28425	1.07789	1.09686		Yes	-	-	1.25385	1.03026	1.36581	1.42982	1.30207	0.950415
TraesCS1A02G071300		chr1A	53903909	53912680		-	-	-	1.7546	2.02096	1.92311	0.812536	0.667694	0.672254		Yes	-	-	2.07646	1.68737	2.10559	1.08297	0.856059	0.878231
TraesCS1A02G071400		chr1A	53993672	53997512		Yes	Yes	Yes	9.97707	9.42761	7.53521	0.516427	0.486262	0.553353		Yes	Yes	Yes	9.88451	10.2853	6.10304	0.734537	1.0363	0.70224
TraesCS1A02G071500		chr1A	54000806	54002679		Yes	Yes	Yes	8.43266	7.83503	6.8278	0.723126	0.53988	0.653297		Yes	Yes	Yes	12.2256	9.15418	6.52597	0.650997	0.678483	0.698481
TraesCS1A02G071700		chr1A	54022014	54027441		-	-	-	16.4507	15.1178	16.451	0.410529	0.370723	0.389539		Yes	Yes	Yes	8.00122	7.19212	7.20827	0.92135	0.679849	0.543069
TraesCS1A02G072000		chr1A	54349175	54355250		-	-	-	75.2427	76.8451	81.2565	0.247859	0.199903	0.23395		Yes	-	-	55.8866	50.0941	54.7121	0.462956	0.451016	0.412278
TraesCS1A02G072100		chr1A	54458835	54461788		-	Yes	-	2.0243	2.0735	2.34372	0.86244	0.875939	1.26015		Yes	-	-	1.08619	0.951415	0.907381	1.31238	1.18993	1.27052
TraesCS1A02G072600		chr1A	56617368	56618763		-	-	-	72.3684	72.5861	68.2831	0.366265	0.373002	0.366627		-	Yes	-	203.848	190.512	175.195	0.332506	0.35714	0.29225
TraesCS1A02G072800		chr1A	56917864	56924080		Yes	-	-	0.476779	0.530398	0.73734	1.64616	1.32173	1.40649		Yes	Yes	Yes	6.22948	6.39197	7.61667	0.561842	0.652866	0.58255
TraesCS1A02G073000		chr1A	57189794	57192224		Yes	Yes	Yes	6.67228	6.03865	6.36096	0.460062	0.401206	0.420424		Yes	-	-	1.31647	1.13284	1.21704	1.4008	1.84288	1.38792
TraesCS1A02G073200		chr1A	57204825	57207507		Yes	Yes	Yes	1.99002	1.50066	1.4629	1.08592	0.922435	1.03125		-	-	-	-	-	-	-	-	-
TraesCS1A02G073300		chr1A	57209812	57212757		Yes	Yes	Yes	8.20133	8.13718	9.08842	0.763995	0.819058	0.766027		Yes	Yes	Yes	9.09457	10.1106	9.62412	0.675271	0.744344	0.557042
TraesCS1A02G073400		chr1A	57302734	57307922		-	-	-	3.76928	4.05692	3.99132	0.486699	0.500354	0.5079		-	Yes	-	5.24548	4.38159	4.85475	0.78939	0.675062	0.572807
TraesCS1A02G073500		chr1A	57390211	57394799		-	Yes	-	2.26663	2.10368	2.19485	0.922789	0.762433	0.746736		-	-	-	-	-	-	-	-	-
TraesCS1A02G073900		chr1A	57634278	57635926		Yes	-	-	2.12268	1.89765	1.5054	0.820758	0.69325	0.864162		Yes	Yes	Yes	17.1811	18.9636	19.2876	0.52121	0.615823	0.488328
TraesCS1A02G074400		chr1A	57763651	57769710		-	-	-	20.8768	22.1201	23.3842	0.556263	0.48837	0.529564		Yes	Yes	Yes	25.7162	24.9755	22.9061	0.41666	0.411783	0.376046
TraesCS1A02G075000		chr1A	58170681	58178010		-	-	-	15.0489	17.032	15.7841	0.435648	0.383162	0.41336		Yes	Yes	Yes	1.52436	1.42007	1.68144	1.34808	0.960913	0.782483
TraesCS1A02G075100		chr1A	58199789	58204396		Yes	Yes	Yes	7.42177	8.02185	9.17558	0.587808	0.530744	0.498769		-	Yes	-	7.73725	7.08488	8.46904	0.57465	0.463923	0.462118
TraesCS1A02G075600		chr1A	58701490	58716429		Yes	-	-	1.34563	1.59425	1.6625	1.01377	0.748651	0.762288		-	-	-	-	-	-	-	-	-
TraesCS1A02G076000		chr1A	58902277	58908361		Yes	-	-	5.4978	5.62001	5.94954	0.522664	0.485667	0.471432		-	Yes	-	6.73493	6.38154	6.99394	0.606923	0.687118	0.662208
TraesCS1A02G076100		chr1A	58931328	58934940		-	-	-	18.1757	17.1659	19.1287	0.426517	0.457961	0.43562		Yes	-	-	11.8871	11.4791	11.2127	0.543883	0.51924	0.557878
TraesCS1A02G076400		chr1A	59130571	59138769		-	-	-	4.72901	4.57758	5.27527	0.605336	0.413188	0.524445		Yes	-	-	1.75991	1.67346	1.72819	0.962452	1.01821	0.949021
TraesCS1A02G076900		chr1A	59613357	59616276		-	Yes	-	10.6353	11.4645	11.2719	1.91777	1.66698	1.76146		Yes	Yes	Yes	21.8602	20.0553	17.301	0.5737	0.637849	0.564259
TraesCS1A02G077500		chr1A	60351393	60353968		-	Yes	-	7.512	6.63259	7.28747	0.659747	0.550913	0.638809		Yes	Yes	Yes	9.4775	8.97453	8.22533	0.369931	0.440149	0.439286
TraesCS1A02G077600		chr1A	60354403	60358841		Yes	-	-	6.0463	6.63583	7.47652	0.471984	0.415045	0.409841		-	Yes	-	6.5013	6.05003	6.64253	1.04745	0.708249	0.688853
TraesCS1A02G078100		chr1A	60954701	60956424		Yes	Yes	Yes	3.03259	3.51555	3.33327	0.978419	0.72881	0.796511		Yes	Yes	Yes	8.95099	11.1782	13.2876	0.569953	0.563059	0.488658
TraesCS1A02G078200		chr1A	61008916	61010405		-	-	-	-	0.394655	-	-	1.12637	-		-	Yes	-	20.537	17.8842	19.0521	0.648958	0.772905	0.666322
TraesCS1A02G078400		chr1A	61032170	61033936		-	-	-	-	-	-	-	-	-		Yes	Yes	Yes	12.741	11.3115	12.7246	0.864235	0.883066	0.87368
TraesCS1A02G078600		chr1A	61341077	61342436		-	-	-	-	-	-	-	-	-		Yes	Yes	Yes	7.75185	7.85593	8.27277	1.20823	0.950636	0.926717
TraesCS1A02G078800		chr1A	61575768	61577009		-	-	-	88.3615	90.0684	87.8545	0.347199	0.346609	0.374607		Yes	Yes	Yes	130.761	138.659	121.486	0.403681	0.36308	0.371562
TraesCS1A02G078900		chr1A	61713578	61714898		Yes	-	-	1.41271	1.7878	1.5472	0.962398	0.702872	0.776404		-	-	-	0.594538	-	-	2.93357	-	-
TraesCS1A02G079400		chr1A	62021323	62024237		-	Yes	-	6.901	7.56884	7.32344	0.546071	0.45906	0.488241		Yes	Yes	Yes	15.5645	15.8348	19.7144	0.437233	0.474854	0.423651
TraesCS1A02G079500		chr1A	62253376	62254809		-	-	-	-	-	-	-	-	-		-	Yes	-	2.47034	2.27027	2.01662	0.952538	0.953426	0.96511
TraesCS1A02G079700		chr1A	62609729	62614089		-	-	-	74.3528	70.8724	65.8819	0.501462	0.449598	0.440016		Yes	Yes	Yes	97.9215	95.9305	93.247	0.446111	0.453629	0.44517
TraesCS1A02G079800		chr1A	62614213	62617255		Yes	Yes	Yes	7.30041	7.14662	6.99044	0.497985	0.537191	0.602926		Yes	Yes	Yes	3.25922	3.43783	3.88318	0.787311	0.700479	0.732445
TraesCS1A02G079900		chr1A	62794172	62794483		Yes	Yes	Yes	1.61374	1.79745	2.10246	1.2312	0.866765	1.04064		Yes	Yes	Yes	2.32176	2.30453	2.29603	0.803741	0.783508	0.919525
TraesCS1A02G080100		chr1A	63045956	63047438		-	-	-	2.26464	2.2787	2.28824	0.624434	0.581283	0.669282		Yes	-	-	3.38679	3.45174	3.50404	0.645652	0.810273	0.569124
TraesCS1A02G080500		chr1A	63327891	63331958		Yes	Yes	Yes	3.26293	2.94437	2.91205	0.934228	0.614575	0.695002		Yes	Yes	Yes	8.14932	6.94767	5.32888	0.695602	0.691852	0.735011
TraesCS1A02G080600		chr1A	63475812	63481063		-	Yes	-	7.94235	6.44742	7.15407	0.807433	0.715687	0.786117		Yes	Yes	Yes	9.85643	8.89788	6.71972	0.517653	0.607322	0.583891
TraesCS1A02G080700		chr1A	63741495	63747947		Yes	Yes	Yes	43.0145	37.6973	39.2204	0.497568	0.361986	0.479581		Yes	Yes	Yes	14.8102	14.0282	11.7756	0.486058	0.426287	0.470581
TraesCS1A02G081200		chr1A	64404585	64414503		Yes	-	-	6.19733	6.06993	5.59673	0.464008	0.437521	0.46529		Yes	-	-	29.2844	26.3699	23.1666	0.401656	0.376056	0.367683
TraesCS1A02G081300		chr1A	64593510	64600216		-	Yes	-	8.55664	9.51385	9.4125	0.504062	0.450926	0.561784		-	Yes	-	27.786	24.0346	26.6701	0.480587	0.520948	0.469933
TraesCS1A02G081400		chr1A	64692229	64694087		-	-	-	24.4885	23.9661	27.0704	0.318147	0.298023	0.273783		Yes	Yes	Yes	12.8333	11.7402	12.1439	0.38252	0.45155	0.416232
TraesCS1A02G082000		chr1A	65261477	65265780		Yes	Yes	Yes	88.5692	84.6294	84.7821	0.367288	0.305734	0.391752		Yes	Yes	Yes	44.1479	37.6859	37.4694	0.479089	0.49162	0.444322
TraesCS1A02G082200		chr1A	65391963	65393451		-	-	-	56.0506	51.4126	52.4969	0.462615	0.403369	0.447044		-	Yes	-	70.1145	70.2605	71.7859	0.336355	0.287042	0.297521
TraesCS1A02G082300		chr1A	65615817	65616636		-	Yes	-	5.68752	5.64128	4.96751	0.772513	0.66752	0.696482		-	Yes	-	20.9877	25.5064	25.9462	0.435418	0.394752	0.440527
TraesCS1A02G082400		chr1A	65663418	65664808		-	-	-	-	-	-	-	-	-		Yes	Yes	Yes	23.4876	31.1696	29.8258	0.710934	0.726564	0.703516
TraesCS1A02G082500		chr1A	65758591	65759654		-	-	-	257.548	242.677	258.301	0.423293	0.447643	0.452547		-	Yes	-	493.196	457.163	419.572	0.636519	0.631163	0.620787
TraesCS1A02G082600		chr1A	65790413	65795583		-	-	-	7.29355	7.68826	8.32087	0.403076	0.394014	0.397577		Yes	Yes	Yes	6.6198	6.3585	6.93252	0.700473	0.56518	0.565959
TraesCS1A02G082700		chr1A	65798876	65800185		Yes	Yes	Yes	3.4568	3.3592	3.92052	1.0747	0.657691	0.934711		-	-	-	-	-	-	-	-	-
TraesCS1A02G083000	TaPIF1-A1	chr1A	66174940	66177799		-	-	-	2.59908	3.1909	3.73538	0.716489	0.67573	0.669144		Yes	-	-	2.1354	1.90687	1.6857	0.896678	0.996186	0.843904
TraesCS1A02G083100		chr1A	66892110	66894637		-	Yes	-	5.85078	6.64952	6.24592	0.791639	0.647273	0.684278		-	Yes	-	2.00422	1.53528	2.11838	0.922877	0.815104	0.824023
TraesCS1A02G083300		chr1A	67467268	67469443		Yes	-	-	14.0452	12.1001	12.3365	0.835876	0.61161	0.641027		Yes	Yes	Yes	12.0788	11.3913	8.18266	0.701585	0.686859	0.790961
TraesCS1A02G083400		chr1A	67683225	67687269		-	-	-	27.4969	28.5703	31.6668	0.362161	0.310458	0.277941		Yes	Yes	Yes	41.4314	39.678	43.5183	0.350088	0.344526	0.269714
TraesCS1A02G083500		chr1A	67689154	67698715		Yes	-	-	2.99202	2.9922	3.4984	0.652561	0.554868	0.786553		Yes	Yes	Yes	3.38451	3.21549	3.82132	0.611686	0.739835	0.633789
TraesCS1A02G084100		chr1A	69188851	69193336		Yes	-	-	4.39077	4.70421	5.59158	0.479492	0.453115	0.481677		Yes	-	-	5.95756	6.0766	7.06646	0.551448	0.53924	0.471158
TraesCS1A02G084200		chr1A	69390436	69394941		Yes	Yes	Yes	2.12621	2.01225	2.07368	0.90938	0.757094	0.796068		-	Yes	-	2.96009	2.86532	2.88669	0.804117	0.726731	0.684639
TraesCS1A02G084300		chr1A	70040014	70041337		-	Yes	-	8.07378	7.98033	7.85471	0.63898	0.530054	0.49721		-	-	-	-	-	-	-	-	-
TraesCS1A02G084500		chr1A	70695360	70705174		Yes	-	-	20.4152	20.1717	19.5747	0.522309	0.463277	0.499747		-	-	-	45.2891	42.7503	39.4306	0.408419	0.43279	0.360781
TraesCS1A02G084600		chr1A	70906359	70906661		-	-	-	-	-	-	-	-	-		-	Yes	-	1.89688	2.11848	2.09736	1.27357	1.36837	1.34235
TraesCS1A02G084800		chr1A	71059897	71060199		Yes	-	-	2.3243	2.14213	2.1799	0.94771	0.909479	0.834249		Yes	Yes	Yes	3.51107	3.48668	2.56032	1.37922	1.25699	1.74313
TraesCS1A02G084900		chr1A	71075742	71076608		Yes	Yes	Yes	3.20429	3.66474	5.21848	0.976174	0.782063	0.804132		-	Yes	-	15.1773	15.0698	9.71818	0.698119	0.643221	0.597554
TraesCS1A02G085000		chr1A	71087176	71095753		Yes	-	-	1.10059	1.36543	1.29435	0.931259	0.70701	0.89582		-	-	-	2.28858	1.82365	1.81217	1.40924	0.774973	0.747573
TraesCS1A02G085200		chr1A	71302354	71302629		-	-	-	-	-	-	-	-	-		Yes	Yes	Yes	1.55609	1.65518	1.64288	1.27666	1.23747	1.21609
TraesCS1A02G085300		chr1A	71444521	71445104		Yes	Yes	Yes	1.36018	1.58782	1.90437	0.981015	0.747556	0.805468		-	-	-	0.352462	0.581184	0.454465	1.60105	1.91247	1.52782
TraesCS1A02G085400		chr1A	71548289	71548949		-	Yes	-	3.61858	3.79667	3.49745	0.638951	0.594047	0.712613		-	Yes	-	19.333	21.3464	20.3986	0.70563	0.699596	0.702835
TraesCS1A02G085500		chr1A	71558243	71561228		Yes	Yes	Yes	4.77741	4.34722	4.32824	0.609121	0.626045	0.620855		-	-	-	0.668424	0.737894	0.765776	1.20157	1.28301	1.23324
TraesCS1A02G085600		chr1A	71689760	71695155		-	-	-	55.6763	54.8065	64.6703	0.294916	0.269709	0.306416		Yes	Yes	Yes	174.572	172.834	193.217	0.548215	0.53269	0.482249
TraesCS1A02G085800		chr1A	71784546	71785643		-	-	-	-	-	-	-	-	-		Yes	-	-	0.558742	0.673248	0.446929	2.02375	1.63622	1.80611
TraesCS1A02G085900		chr1A	71786598	71790263		-	Yes	-	2.54169	2.41074	2.72778	0.669347	0.563705	0.553356		-	-	-	1.75923	1.60813	1.86095	0.938687	1.07716	0.771363
TraesCS1A02G086100		chr1A	72782626	72785888		Yes	Yes	Yes	14.4498	12.651	8.97065	0.457758	0.389048	0.487057		Yes	Yes	Yes	5.90252	5.20423	4.93526	0.666348	0.590441	0.644021
TraesCS1A02G086500		chr1A	73295476	73300550		-	-	-	25.4431	25.6518	27.4848	0.281941	0.274152	0.262652		Yes	-	-	26.1678	26.1205	27.7241	0.413077	0.376849	0.332011
TraesCS1A02G086600		chr1A	73302087	73306610		Yes	-	-	19.6219	20.7142	23.5657	0.415819	0.349403	0.347111		-	-	-	27.2201	25.3394	28.631	0.436161	0.380968	0.38821
TraesCS1A02G086700		chr1A	73308803	73309039		-	-	-	-	-	-	-	-	-		-	Yes	-	5.69143	5.45045	4.31157	0.819086	0.974881	1.03161
TraesCS1A02G086800		chr1A	73312930	73322282		-	-	-	10.5459	10.504	11.3133	0.38658	0.265941	0.402939		Yes	Yes	Yes	6.47758	6.25497	6.67278	0.556642	0.532358	0.671546
TraesCS1A02G086900		chr1A	73322508	73330054		-	-	-	7.64883	7.2188	8.42615	0.457617	0.3613	0.371965		Yes	Yes	Yes	6.45228	6.88438	8.84077	0.739617	0.654646	0.618989
TraesCS1A02G087500		chr1A	74431375	74444306		-	Yes	-	6.99664	7.43674	7.75726	0.600094	0.573682	0.556576		Yes	-	-	1.09627	0.98331	0.948006	1.26625	0.972311	1.02096
TraesCS1A02G087900		chr1A	75715901	75722755		Yes	-	-	3.82893	3.73265	4.90917	0.514616	0.537127	0.574594		-	Yes	-	4.16972	3.96668	4.71954	0.841778	0.766716	0.697118
TraesCS1A02G088000		chr1A	76022646	76031768		-	-	-	13.7899	12.8591	14.0208	0.380358	0.352053	0.326327		Yes	Yes	Yes	15.7962	14.9972	15.3605	0.514292	0.514094	0.46016
TraesCS1A02G088100		chr1A	76485956	76492268		-	-	-	24.6953	24.5682	27.63	0.295138	0.247461	0.255485		Yes	Yes	Yes	31.3044	28.0574	28.1938	0.397348	0.434695	0.39324
TraesCS1A02G088200		chr1A	76495320	76501435		-	-	-	1.37103	1.62492	1.725	0.925129	0.75347	0.87523		Yes	-	-	1.11878	1.11398	1.44931	1.06651	1.1858	1.22701
TraesCS1A02G088400		chr1A	76728728	76730601		-	-	-	-	-	-	-	-	-		-	Yes	-	28.1753	30.028	27.0104	0.60382	0.606657	0.688664
TraesCS1A02G088600		chr1A	77069781	77072982		-	-	-	1.13326	1.48198	2.00464	0.902463	1.10363	1.71583		Yes	Yes	Yes	8.06954	8.35873	10.3204	0.888879	0.729683	0.711883
TraesCS1A02G088900		chr1A	77103810	77107960		-	-	-	17.0661	16.474	18.8561	0.427625	0.338916	0.374477		Yes	Yes	Yes	17.1905	16.4647	17.0345	0.496318	0.480935	0.417411
TraesCS1A02G089100		chr1A	78323461	78331744		-	Yes	-	6.48776	6.46561	6.37524	0.533591	0.441604	0.530509		-	Yes	-	7.19145	7.28414	6.50693	0.658835	0.630173	0.540902
TraesCS1A02G089500		chr1A	78962470	78964533		Yes	Yes	Yes	95.7218	90.2959	80.3195	0.578836	0.604261	0.654277		-	Yes	-	5.28028	4.16752	4.03762	1.04085	1.54149	1.21044
TraesCS1A02G089600		chr1A	79107177	79108103		Yes	Yes	Yes	88.636	83.6957	72.6948	0.616983	0.590472	0.639141		Yes	Yes	Yes	10.9311	9.61602	7.85505	1.03131	1.2673	1.21798
TraesCS1A02G089800		chr1A	79167082	79169605		Yes	Yes	Yes	3.30749	3.27705	3.07978	0.601023	0.613235	0.65748		-	-	-	-	-	-	-	-	-
TraesCS1A02G090600		chr1A	80683274	80687060		-	-	-	34.4576	32.6822	34.5506	0.292342	0.261645	0.288856		Yes	-	-	13.3392	12.3024	15.1933	0.453285	0.442709	0.346662
TraesCS1A02G091000		chr1A	82127357	82129287		-	Yes	-	1.30182	1.17957	1.59345	1.00162	1.07958	1.04206		-	Yes	-	1.46827	1.29852	1.4515	1.28383	1.52085	1.10002
TraesCS1A02G091100		chr1A	82517368	82528033		-	-	-	20.4709	21.2472	24.6301	0.332299	0.278168	0.316622		-	Yes	-	17.878	17.7258	20.0326	0.505963	0.527529	0.487771
TraesCS1A02G091200		chr1A	82530925	82535170		-	-	-	4.91109	5.28027	5.48269	0.433494	0.48804	0.397477		Yes	Yes	Yes	6.56544	6.00155	6.61384	0.720022	0.560358	0.528269
TraesCS1A02G091300		chr1A	82947327	82952587		Yes	-	-	10.8954	11.4938	13.3371	0.484033	0.441366	0.429131		-	-	-	43.6496	40.2864	37.3682	0.452221	0.453182	0.414633
TraesCS1A02G091400		chr1A	83822449	83835952		Yes	Yes	Yes	2.02339	2.06455	2.15057	0.752491	0.877468	0.733503		Yes	Yes	Yes	3.23467	2.93833	2.95011	0.824459	0.901738	0.721765
TraesCS1A02G092100		chr1A	84727966	84730032		-	-	-	-	-	-	-	-	-		Yes	-	-	0.944882	1.20878	1.1723	2.01035	3.61762	1.49634
TraesCS1A02G092200		chr1A	84793974	84795298		-	-	-	-	-	-	-	-	-		Yes	-	-	0.905221	0.657486	0.662554	1.99625	1.59422	1.57254
TraesCS1A02G092700		chr1A	85032415	85035322		Yes	-	-	45.5745	41.6244	40.9122	0.557309	0.552749	0.507029		-	Yes	-	21.6766	22.2395	21.4906	0.597486	0.606797	0.593329
TraesCS1A02G092900		chr1A	85344049	85346466		-	Yes	-	221.733	243.669	250.954	0.493313	0.390621	0.449171		Yes	Yes	Yes	294.114	339.808	352.868	0.492137	0.483318	0.480794
TraesCS1A02G093000		chr1A	85823062	85823960		Yes	-	-	2.67753	3.06202	4.10846	1.88862	1.74262	1.9663		Yes	Yes	Yes	11.1189	9.1215	8.66859	0.887727	0.914857	1.06676
TraesCS1A02G093300		chr1A	86235469	86240447		Yes	-	-	1.29222	1.31306	0.973658	1.36171	1.15971	1.84928		-	Yes	-	26.8737	25.1973	27.7925	0.675487	0.673576	0.787875
TraesCS1A02G093800		chr1A	86638820	86641089		-	-	-	233.436	245.683	225.769	0.232149	0.242704	0.24922		-	Yes	-	713.546	685.803	639.163	0.323356	0.311518	0.322167
TraesCS1A02G093900		chr1A	86644142	86649260		Yes	-	-	33.9233	34.1702	36.522	0.353434	0.289987	0.348528		Yes	-	-	21.757	20.6203	22.6079	0.450729	0.435115	0.400778
TraesCS1A02G094000		chr1A	87198152	87201062		Yes	-	-	6.85899	7.34646	7.49054	0.466933	0.388903	0.410558		Yes	-	-	4.3569	4.17134	5.28592	0.649493	0.69185	0.570046
TraesCS1A02G094700		chr1A	90106135	90110560		-	Yes	-	8.95477	11.7204	12.7135	0.965882	0.819593	0.794546		Yes	Yes	Yes	15.5332	13.4017	6.98988	0.710816	0.672773	0.749891
TraesCS1A02G094900		chr1A	90162001	90163497		-	-	-	-	-	-	-	-	-		-	Yes	-	0.958878	1.24519	1.06197	1.38082	1.48051	1.1934
TraesCS1A02G095000		chr1A	90759665	90768599		-	-	-	33.428	34.1923	38.5273	0.266897	0.261139	0.256157		Yes	-	-	49.1073	45.2893	50.205	0.377585	0.407907	0.346318
TraesCS1A02G095100		chr1A	91043144	91048307		Yes	Yes	Yes	10.4132	10.4028	10.7729	0.423734	0.444355	0.503871		-	Yes	-	13.1159	11.8839	13.8118	0.583173	0.653428	0.514916
TraesCS1A02G095600		chr1A	91174551	91176315		Yes	Yes	Yes	4.99187	5.23654	6.19409	0.825868	0.772206	0.828783		Yes	Yes	Yes	4.28634	3.75519	5.83701	1.22485	0.674515	0.706333
TraesCS1A02G095800		chr1A	91410869	91414181		Yes	-	-	11.109	9.92556	9.02697	0.468397	0.559849	0.595897		Yes	Yes	Yes	4.18948	4.73707	5.99642	0.646993	0.760493	0.587236
TraesCS1A02G096000		chr1A	91498965	91502453		-	-	-	12.4832	13.3278	13.6548	0.346852	0.318167	0.311049		Yes	-	-	12.8786	13.3755	13.8771	0.361538	0.372461	0.296515
TraesCS1A02G096100		chr1A	91502767	91505217		-	-	-	6.92594	7.51842	8.617	0.403063	0.373606	0.348311		-	Yes	-	9.00471	8.46553	9.31037	0.45274	0.448992	0.390604
TraesCS1A02G096500		chr1A	92564927	92567805		-	Yes	-	80.8807	86.3507	86.7197	0.557886	0.487061	0.443899		Yes	Yes	Yes	116.74	136.321	137.115	0.586673	0.596476	0.519433
TraesCS1A02G096600		chr1A	92570552	92575558		Yes	-	-	10.1607	10.7218	11.6499	0.577298	0.526924	0.581043		Yes	Yes	Yes	56.7644	60.9131	68.6947	0.462726	0.512639	0.472286
TraesCS1A02G097000		chr1A	93367123	93367842		Yes	Yes	Yes	12.9631	12.501	11.5076	0.679529	0.477373	0.483141		-	-	-	-	-	-	-	-	-
TraesCS1A02G097100		chr1A	93392091	93397887		-	-	-	0.617673	0.607823	0.677922	1.19007	1.48375	1.00449		Yes	-	-	0.674567	0.692848	0.999315	1.41603	1.45257	1.17603
TraesCS1A02G097500		chr1A	94101332	94106484		Yes	-	-	4.86881	4.47893	4.82979	0.512139	0.487156	0.512366		-	Yes	-	4.66698	4.25692	4.45885	0.63563	0.59042	0.502929
TraesCS1A02G097600		chr1A	94109874	94114153		Yes	-	-	4.17806	4.44941	4.87786	0.481511	0.474488	0.474425		-	Yes	-	2.51542	2.55454	2.58495	0.891276	0.828948	0.654405
TraesCS1A02G097700		chr1A	94244913	94249051		-	-	-	81.2836	85.4755	86.6598	0.287681	0.309742	0.277732		Yes	Yes	Yes	92.5698	90.8402	107.273	0.321089	0.334659	0.307754
TraesCS1A02G098900		chr1A	95057831	95062924		-	-	-	-	-	-	-	-	-		-	Yes	-	2.69235	2.04707	2.39211	1.35148	1.29996	0.947451
TraesCS1A02G099000		chr1A	95183261	95185789		-	-	-	87.5245	81.5092	74.9741	0.482962	0.491364	0.460167		Yes	Yes	Yes	23.7246	20.5408	19.1654	0.452561	0.452644	0.429038
TraesCS1A02G099300		chr1A	95820621	95826073		-	-	-	26.7282	24.7507	25.3035	0.443708	0.411514	0.392842		-	Yes	-	21.897	19.9088	22.86	0.507896	0.582037	0.524059
TraesCS1A02G099400		chr1A	95848238	95853644		-	-	-	4.96329	5.85378	5.74985	0.706619	0.577266	0.567255		Yes	Yes	Yes	6.23374	5.79239	6.97252	0.553488	0.577053	0.482803
TraesCS1A02G099500		chr1A	95854753	95860989		-	-	-	20.7048	21.6767	22.452	0.39547	0.289212	0.344211		-	Yes	-	10.0466	11.078	10.6325	0.482546	0.447452	0.401763
TraesCS1A02G100000		chr1A	96446461	96447320		-	-	-	-	-	0.531278	-	-	1.13312		Yes	-	-	0.882348	0.991141	0.95481	1.72676	1.11331	1.18112
TraesCS1A02G100100		chr1A	96449469	96451542		Yes	Yes	Yes	6.89423	7.83027	8.28281	0.980652	0.927962	0.910463		Yes	Yes	Yes	44.2513	39.6507	34.8013	0.561925	0.529781	0.706833
TraesCS1A02G100200		chr1A	96453204	96455187		-	-	-	9.8076	10.5365	10.9785	0.37448	0.334356	0.318849		-	Yes	-	7.90784	8.9059	8.34982	0.508687	0.507997	0.489247
TraesCS1A02G100400		chr1A	96470434	96473287		Yes	-	-	1.1543	1.4276	1.99909	0.917544	1.1404	0.941788		-	-	-	0.612687	0.500678	0.545561	1.70761	1.6943	1.62938
TraesCS1A02G101000		chr1A	97643035	97647138		Yes	Yes	Yes	1.97512	2.06993	1.96498	1.20721	0.893494	1.05138		-	-	-	0.763073	0.750663	0.619771	1.98525	1.62452	1.475
TraesCS1A02G101100		chr1A	97792599	97796606		-	-	-	1.15	1.09327	1.32414	0.859589	0.811368	0.835077		-	Yes	-	1.73228	1.96041	1.87814	0.814459	0.917298	0.938276
TraesCS1A02G101300		chr1A	97805353	97810182		Yes	-	-	1.66779	1.90755	2.12909	0.947624	0.800718	0.869062		-	-	-	-	-	-	-	-	-
TraesCS1A02G101900		chr1A	98019574	98021697		Yes	-	-	4.73816	5.05392	5.34245	0.66605	0.4894	0.513292		-	Yes	-	10.1629	11.1513	11.5286	0.514123	0.51038	0.472992
TraesCS1A02G102300		chr1A	98242495	98247975		Yes	-	-	15.9839	15.5258	16.303	0.493696	0.470354	0.40494		-	Yes	-	9.79095	9.09995	8.6171	0.767209	0.62705	0.627077
TraesCS1A02G102500		chr1A	99001419	99010088		-	Yes	-	8.5068	8.80432	9.05929	0.599134	0.468915	0.562924		Yes	-	-	2.52078	2.67482	3.25871	0.806245	0.715616	0.691232
TraesCS1A02G102700		chr1A	99018552	99019580		-	-	-	1.11259	0.840568	0.840353	1.45341	1.30205	1.03107		-	Yes	-	43.387	50.1284	42.7756	0.881408	0.789019	0.866073
TraesCS1A02G102800		chr1A	99071008	99072331		Yes	Yes	Yes	5.10552	4.87285	4.2535	0.631745	0.563765	0.601579		Yes	Yes	Yes	28.6096	37.1158	42.4864	0.664084	0.574705	0.575748
TraesCS1A02G102900		chr1A	99138834	99140074		-	-	-	-	-	0.367537	-	-	2.03334		Yes	-	-	0.923726	0.961688	1.0467	1.39084	1.35486	1.01726
TraesCS1A02G103000		chr1A	99148620	99149896		-	-	-	-	-	-	-	-	-		Yes	-	-	0.65027	0.540517	0.680732	1.35922	1.43911	1.18912
TraesCS1A02G103900		chr1A	99868032	99871106		-	Yes	-	2.98894	3.23189	3.12547	0.803857	0.695795	0.807019		-	Yes	-	5.49209	5.48878	6.64507	0.710769	0.642812	0.766145
TraesCS1A02G104100		chr1A	100002208	100012221		-	-	-	-	-	-	-	-	-		Yes	Yes	Yes	5.72123	7.62661	10.5736	1.06589	0.993548	0.891151
TraesCS1A02G104200		chr1A	100039051	100040874		Yes	-	-	0.680011	0.468455	0.5816	1.41969	1.66244	3.14683		Yes	Yes	Yes	54.726	56.4533	64.4368	0.968295	0.875599	0.793542
TraesCS1A02G104300		chr1A	100099707	100104633		Yes	Yes	Yes	2.86827	2.24165	2.01057	1.08491	0.939873	1.09979		-	-	-	-	-	-	-	-	-
TraesCS1A02G104500		chr1A	100267212	100272922		Yes	-	-	0.65155	0.802238	0.892118	1.40233	1.15825	1.15951		-	-	-	-	-	-	-	-	-
TraesCS1A02G104700		chr1A	100291939	100297147		Yes	-	-	1.58156	1.55567	1.9732	0.934304	0.770296	0.781391		Yes	-	-	1.64923	2.01473	2.47167	0.775462	0.947677	0.74055
TraesCS1A02G105400		chr1A	101334864	101335739		-	Yes	-	100.424	116.112	113.899	0.518047	0.412474	0.450462		-	Yes	-	158.466	175.286	177.667	0.412389	0.407053	0.404997
TraesCS1A02G105800		chr1A	102359664	102365134		Yes	-	-	16.2529	18.0037	17.9433	0.505715	0.410515	0.394115		Yes	-	-	40.5873	38.2487	48.4262	0.513583	0.494979	0.395194
TraesCS1A02G106100		chr1A	103311704	103326325		-	-	-	15.5286	14.9316	15.9089	0.380089	0.327996	0.403209		Yes	Yes	Yes	21.5733	20.7658	22.4014	0.525002	0.48242	0.485921
TraesCS1A02G106300		chr1A	104208687	104219859		-	-	-	2.38139	2.22324	2.68573	0.666074	0.606852	0.610122		-	Yes	-	1.80524	1.5231	1.67549	0.962047	1.30254	0.906293
TraesCS1A02G106500		chr1A	104225642	104230111		Yes	-	-	8.35136	7.94309	8.74182	0.34698	0.331256	0.364517		-	-	-	-	-	0.389124	-	-	1.62907
TraesCS1A02G106600		chr1A	104377540	104379785		-	-	-	228.708	232.421	254.323	0.224453	0.169034	0.174897		-	Yes	-	216.689	222.14	209.07	0.293599	0.284034	0.338496
TraesCS1A02G106700		chr1A	104432549	104433415		Yes	-	-	6.0787	6.44235	6.87032	0.607936	0.497539	0.507845		Yes	Yes	Yes	10.8081	12.6164	14.4765	0.597851	0.654413	0.574445
TraesCS1A02G106900		chr1A	104578913	104581669		-	-	-	-	-	-	-	-	-		Yes	Yes	Yes	2.29919	2.78097	3.70158	1.22423	1.32795	0.918594
TraesCS1A02G107300		chr1A	104937224	104949835		-	-	-	11.8545	11.6027	13.5087	0.344302	0.315632	0.331058		-	Yes	-	5.33842	4.75145	5.66221	0.807436	0.63409	0.587985
TraesCS1A02G107500		chr1A	105885703	105887086		-	Yes	-	4.69471	4.68208	3.41238	1.09417	0.68368	0.6834		-	-	-	0.34716	-	-	1.78058	-	-
TraesCS1A02G107600		chr1A	105903502	105906285		Yes	-	-	5.93595	5.24249	6.37508	0.488776	0.539378	0.512579		-	Yes	-	7.93311	7.01795	8.69369	0.669001	0.598815	0.557003
TraesCS1A02G108100		chr1A	107107556	107110090		Yes	-	-	2.79695	3.25717	2.95807	0.63088	0.733075	0.605604		-	-	-	15.0708	15.7276	15.6025	0.46474	0.481283	0.40521
TraesCS1A02G108300		chr1A	107466471	107482160		Yes	-	-	5.05237	5.46783	5.7361	0.506984	0.43302	0.492466		-	Yes	-	7.62426	6.04893	6.38076	0.614663	0.567755	0.589696
TraesCS1A02G108400		chr1A	107484216	107485732		Yes	Yes	Yes	2.44847	2.33156	2.28362	0.710589	0.720249	0.856498		-	Yes	-	21.3203	22.8877	21.6672	0.625413	0.664713	0.598037
TraesCS1A02G108900		chr1A	108076850	108081795		Yes	Yes	Yes	6.71346	6.58328	7.17468	0.5963	0.526038	0.534812		-	Yes	-	8.74526	7.81907	9.10851	0.673024	0.691151	0.568639
TraesCS1A02G109200		chr1A	108687044	108691586		-	-	-	6.53624	7.36484	7.65468	0.442212	0.390131	0.430503		Yes	Yes	Yes	10.1562	10.1635	10.4483	0.447818	0.470012	0.358491
TraesCS1A02G109300		chr1A	108692883	108697532		-	Yes	-	6.7479	7.27826	8.12399	0.641292	0.573474	0.535214		Yes	Yes	Yes	9.7135	9.99771	11.4246	0.478053	0.451924	0.397771
TraesCS1A02G109500		chr1A	108769536	108774492		-	-	-	1.58232	1.66378	1.98143	0.825079	0.844479	0.67623		-	Yes	-	1.98344	1.65038	2.31206	1.20079	0.990161	0.889766
TraesCS1A02G109600		chr1A	108774424	108775742		Yes	Yes	Yes	1.9618	2.1586	2.17969	0.801725	0.619192	0.712609		-	-	-	-	-	-	-	-	-
TraesCS1A02G109800		chr1A	108798155	108800103		-	-	-	-	-	-	-	-	-		Yes	-	-	0.712967	0.763485	0.666372	1.9026	2.15349	1.44344
TraesCS1A02G110000		chr1A	108921601	108924502		Yes	Yes	Yes	8.9728	8.50953	7.88373	1.01677	1.00756	0.971867		Yes	-	-	2.66133	2.517	1.91967	1.24589	1.32724	1.13345
TraesCS1A02G110300		chr1A	109982664	109986523		Yes	-	-	39.0414	35.2445	38.2755	0.415992	0.335561	0.319546		Yes	-	-	48.1861	44.135	41.718	0.464297	0.434055	0.443566
TraesCS1A02G110400		chr1A	110072873	110073869		-	-	-	0.69733	0.704694	0.603781	1.80536	1.56491	1.56504		-	Yes	-	2.43599	2.30836	2.25634	1.2742	0.746383	0.80274
TraesCS1A02G110700		chr1A	110279386	110282081		-	Yes	-	1.67174	1.70446	1.94278	0.853079	0.713609	0.692633		-	-	-	-	-	0.466612	-	-	1.86106
TraesCS1A02G110800		chr1A	110282478	110284392		Yes	-	-	3.04706	3.00237	3.00052	0.649467	0.56193	0.59458		-	-	-	-	-	-	-	-	-
TraesCS1A02G110900		chr1A	111122761	111132907		-	Yes	-	18.0793	14.7613	16.9984	0.642689	0.610559	0.683288		-	-	-	0.638094	0.484839	0.663065	1.64239	1.48503	1.33368
TraesCS1A02G111000		chr1A	111150791	111153945		Yes	-	-	18.135	17.8693	17.43	0.518284	0.518318	0.513972		-	Yes	-	3.99842	3.86976	4.53764	1.03629	1.12141	0.905067
TraesCS1A02G111100		chr1A	111534404	111538376		-	Yes	-	4.9072	4.87228	5.18509	0.591921	0.662156	0.624291		-	Yes	-	1.63364	1.30542	1.98236	1.34905	1.11126	1.301
TraesCS1A02G111300		chr1A	112035816	112042777		-	-	-	0.987406	1.22696	1.08954	1.13285	0.966816	0.875286		Yes	Yes	Yes	1.67778	1.40285	1.66897	1.76515	0.980347	1.19197
TraesCS1A02G111500		chr1A	112927734	112928544		-	-	-	0.511127	0.535629	0.558457	1.3143	1.322	1.48081		Yes	Yes	Yes	12.8958	15.9782	17.5996	0.634595	0.738947	0.690549
TraesCS1A02G111600		chr1A	112934976	112942003		-	Yes	-	1.64516	1.62237	1.98275	0.649842	0.717114	1.22365		-	-	-	2.26727	2.48998	2.72178	0.775833	0.783374	0.669772
TraesCS1A02G111800		chr1A	113251084	113252461		-	-	-	3.74657	4.55022	3.85983	0.698898	0.553012	0.648773		-	Yes	-	7.58357	8.65103	7.93891	0.534954	0.564038	0.592659
TraesCS1A02G111900		chr1A	113538203	113541509		-	-	-	41.9389	40.6374	38.39	0.306871	0.278736	0.279084		Yes	Yes	Yes	3.78384	3.49959	3.56358	0.821874	0.720823	0.679698
TraesCS1A02G112100		chr1A	113858147	113861587		-	-	-	16.0743	16.136	16.0765	0.404238	0.343873	0.393084		Yes	Yes	Yes	18.674	17.6647	24.9982	0.536284	0.463048	0.40102
TraesCS1A02G112200		chr1A	113877741	113880731		-	-	-	5.99649	5.85808	5.65844	0.460955	0.423084	0.477531		Yes	-	-	5.06786	6.05781	7.16071	0.605892	0.567133	0.488358
TraesCS1A02G112400		chr1A	114060494	114063211		Yes	-	-	15.1574	15.5176	15.5457	0.451675	0.449686	0.459187		-	-	-	11.9887	11.0605	10.3288	0.478386	0.410115	0.458054
TraesCS1A02G112500		chr1A	114544596	114546676		Yes	-	-	396.189	412.306	417.025	0.316137	0.245479	0.287542		-	Yes	-	1184.64	1299.51	1298.42	0.325333	0.313151	0.347409
TraesCS1A02G112700		chr1A	115357679	115363324		Yes	-	-	6.60118	6.13217	6.15659	0.527499	0.375785	0.53971		Yes	-	-	11.9415	11.059	9.8617	0.447813	0.571213	0.420947
TraesCS1A02G112800		chr1A	115364416	115368103		Yes	-	-	7.57727	7.32551	8.91753	0.426721	0.387064	0.401006		-	Yes	-	6.49934	6.35847	7.287	0.554787	0.543407	0.463399
TraesCS1A02G113100		chr1A	115939762	115940521		-	Yes	-	8.76462	9.16158	7.47646	1.01429	0.887103	0.880297		Yes	Yes	Yes	1.99453	2.97606	4.62317	1.29632	0.95818	0.775793
TraesCS1A02G113300		chr1A	115975501	115978707		-	-	-	9.16809	9.10487	7.6989	0.596314	0.599995	0.589006		Yes	-	-	11.7028	11.3807	13.1749	0.51907	0.413936	0.473867
TraesCS1A02G113700		chr1A	117194227	117198243		Yes	-	-	3.66519	3.75691	3.474	0.571074	0.41462	0.589035		-	Yes	-	9.20223	8.99498	9.16215	0.512033	0.548945	0.46957
TraesCS1A02G113800		chr1A	117244235	117248380		-	-	-	-	-	0.431877	-	-	1.42503		Yes	Yes	Yes	5.59274	6.02511	6.50582	0.754667	0.821676	0.687023
TraesCS1A02G114000		chr1A	117906705	117912166		-	Yes	-	4.15287	3.9959	4.81543	0.520061	0.523172	0.575258		Yes	Yes	Yes	2.18363	2.32332	2.95671	0.999035	1.05058	0.745955
TraesCS1A02G114600		chr1A	118809204	118815557		-	-	-	2.13468	2.07896	2.34554	0.81396	0.898256	0.77876		-	Yes	-	1.21467	1.11094	1.53059	1.24125	1.41056	1.0736
TraesCS1A02G114700		chr1A	118847401	118850726		-	-	-	0.675115	0.879713	0.689637	1.15516	0.87525	1.10058		Yes	-	-	0.818775	1.30913	1.26641	1.01842	0.934244	1.04717
TraesCS1A02G115000		chr1A	119148850	119152242		Yes	-	-	29.6182	30.5584	28.4188	0.355161	0.328222	0.34469		Yes	Yes	Yes	1.57832	1.83129	1.93781	0.999751	0.847931	0.778538
TraesCS1A02G115100		chr1A	119493399	119496915		-	-	-	13.5544	14.653	16.6831	0.340543	0.389118	0.443035		-	Yes	-	15.1802	15.1124	14.0211	0.564649	0.485914	0.511862
TraesCS1A02G115200		chr1A	119703455	119708196		Yes	-	-	5.36649	5.16755	4.858	0.745183	0.681522	0.693519		Yes	-	-	1.00496	0.789568	1.10612	1.08259	1.47064	1.30645
TraesCS1A02G115400		chr1A	119739449	119740541		Yes	Yes	Yes	7.4321	8.27822	9.55639	0.654395	0.575409	0.575003		Yes	Yes	Yes	1.39619	1.74888	1.88656	1.10581	1.27416	1.08271
TraesCS1A02G115500		chr1A	120002303	120011148		-	Yes	-	3.27754	3.53011	4.17338	0.58684	0.528368	0.458522		-	Yes	-	3.14616	3.077	3.81218	0.752702	0.75625	0.896234
TraesCS1A02G115700	TaGLY17-A1	chr1A	120363802	120365499		Yes	Yes	Yes	12.5397	8.90835	9.08401	0.994445	0.806018	0.919036		Yes	Yes	Yes	43.3305	31.5809	22.108	0.78541	0.629407	0.632318
TraesCS1A02G115900		chr1A	121129148	121129901		Yes	Yes	Yes	1818.99	1774.45	1453.35	0.362179	0.329984	0.342508		-	Yes	-	2585.19	2698.97	2270.15	0.66191	0.644852	0.687125
TraesCS1A02G116000		chr1A	121133252	121137773		-	-	-	8.64044	8.68069	9.65985	0.453346	0.322013	0.371433		Yes	Yes	Yes	5.65167	5.51684	6.62915	0.637616	0.66362	0.628069
TraesCS1A02G116200		chr1A	121740032	121746242		-	-	-	10.4179	12.3897	11.3493	0.716615	0.602193	0.696086		Yes	-	-	10.2664	10.1024	10.6352	0.591738	0.594699	0.580924
TraesCS1A02G116500		chr1A	123549115	123552588		Yes	-	-	2.49314	3.00951	3.40743	0.661856	0.565703	0.683377		Yes	Yes	Yes	3.34534	3.45722	4.13363	0.879308	0.656566	0.6581
TraesCS1A02G116600		chr1A	123552798	123554818		Yes	Yes	Yes	3.28565	3.20763	2.88171	0.641491	0.727335	0.584416		-	Yes	-	8.62964	8.15959	9.43503	0.53514	0.57639	0.486458
TraesCS1A02G116700		chr1A	124011291	124011803		Yes	Yes	Yes	41.5784	37.3598	33.7326	0.651422	0.738439	0.59345		Yes	Yes	Yes	18.7081	19.3125	19.5086	0.976014	0.903346	0.768585
TraesCS1A02G116900		chr1A	124180828	124181726		Yes	-	-	47.9268	48.3246	43.3362	0.492012	0.445314	0.446888		Yes	Yes	Yes	36.1152	31.9041	20.9502	0.496168	0.518585	0.573833
TraesCS1A02G117000		chr1A	124189773	124190156		-	-	-	-	-	-	-	-	-		Yes	-	-	0.761191	0.676343	0.602618	1.38983	1.88542	1.54947
TraesCS1A02G117400		chr1A	124786602	124787399		-	Yes	-	24.6192	28.3529	22.9976	0.649932	0.676422	0.661697		Yes	Yes	Yes	27.5296	24.9368	18.9216	0.798421	0.692326	0.695334
TraesCS1A02G117500		chr1A	124885857	124891820		-	Yes	-	2.07157	2.31732	2.2898	0.882861	0.834478	0.844321		-	-	-	0.428058	0.390275	0.649473	1.59673	1.42861	1.56801
TraesCS1A02G118200		chr1A	126853151	126854907		-	Yes	-	5.08566	5.29394	4.75537	0.654233	0.521421	0.621042		-	Yes	-	2.10063	1.70057	2.33814	1.01333	1.08767	0.808268
TraesCS1A02G118400		chr1A	127075151	127077797		-	-	-	26.0968	25.3547	23.7203	0.340576	0.331766	0.269494		Yes	Yes	Yes	31.5231	33.6909	34.4746	0.430211	0.463051	0.497354
TraesCS1A02G118700		chr1A	127352105	127355810		-	-	-	12.2686	12.5432	13.8414	0.406132	0.344488	0.331012		Yes	Yes	Yes	11.1051	10.3233	11.0517	0.576024	0.619087	0.571355
TraesCS1A02G118800		chr1A	127756737	127761052		-	-	-	11.5574	11.0594	11.0796	0.612093	0.520767	0.506418		Yes	-	-	20.8251	19.4894	17.8788	0.405953	0.353615	0.385295
TraesCS1A02G119000		chr1A	128634284	128634541		-	-	-	3.39726	2.85218	3.32745	1.12801	0.843377	0.804084		-	Yes	-	6.51155	6.8492	5.43884	1.20822	1.12653	1.27039
TraesCS1A02G119300		chr1A	130149160	130151093		Yes	Yes	Yes	12.9582	13.4269	15.8026	0.590506	0.548486	0.525931		Yes	Yes	Yes	5.49702	5.40919	4.71067	0.613017	0.628378	0.689388
TraesCS1A02G119500		chr1A	130909358	130913217		Yes	Yes	Yes	19.6177	18.3654	18.9091	0.773656	0.597954	0.621627		Yes	Yes	Yes	52.6817	44.4869	35.0379	0.416027	0.427119	0.393247
TraesCS1A02G119600		chr1A	131520069	131521683		Yes	-	-	11.9857	12.5724	11.0014	0.528635	0.520452	0.485253		Yes	Yes	Yes	5.41582	6.11513	9.05352	0.693969	0.651138	0.484885
TraesCS1A02G119700		chr1A	131963409	131971449		Yes	-	-	7.07412	6.98808	6.88209	0.503944	0.510135	0.522961		-	Yes	-	2.84104	2.56899	2.9592	0.845347	0.833707	0.80878
TraesCS1A02G119800		chr1A	132133545	132135498		Yes	Yes	Yes	4.55913	4.23647	4.44556	0.785727	0.590558	0.619841		-	Yes	-	2.67594	2.66249	2.24638	0.850421	0.918959	0.826287
TraesCS1A02G120000		chr1A	132414459	132416227		Yes	Yes	Yes	3.27083	3.54552	4.20001	0.624023	0.623799	0.55651		Yes	Yes	Yes	3.82865	3.70985	4.95766	0.644174	0.571395	0.598441
TraesCS1A02G120100		chr1A	132481070	132485645		Yes	-	-	1.96816	2.1469	2.43047	0.8288	0.837917	1.01055		-	-	-	2.18609	1.98253	2.38371	1.00494	0.901171	0.91908
TraesCS1A02G120400		chr1A	132797900	132800842		-	-	-	1.80803	1.7137	1.89404	0.791022	0.804224	0.713282		Yes	-	-	3.83137	3.77076	4.35527	0.658235	0.644187	0.537639
TraesCS1A02G120500		chr1A	133126431	133127187		-	-	-	11.196	12.0696	12.5512	0.355602	0.321085	0.351696		-	Yes	-	10.4666	10.3063	11.1281	0.474189	0.464202	0.383465
TraesCS1A02G120900		chr1A	133170778	133174000		-	-	-	6.78668	6.99098	6.57947	0.4046	0.458308	0.393246		-	Yes	-	4.88587	4.50186	5.42894	0.659054	0.58165	0.459816
TraesCS1A02G121000		chr1A	133412308	133418388		-	-	-	27.4286	29.2697	30.8261	0.283898	0.313845	0.276719		-	Yes	-	35.7911	34.74	35.6127	0.452045	0.488541	0.430164
TraesCS1A02G121200		chr1A	134000568	134004799		-	-	-	3.37158	3.48402	3.20979	0.609486	0.507306	0.600685		Yes	Yes	Yes	4.41841	4.35092	4.39313	0.706519	0.578941	0.543193
TraesCS1A02G121400		chr1A	134956636	134964000		-	-	-	7.44325	7.67533	8.78486	0.439075	0.336599	0.41817		Yes	Yes	Yes	8.19413	7.14555	7.70688	0.573111	0.562309	0.421471
TraesCS1A02G121700		chr1A	135508961	135523923		-	-	-	9.73547	9.51688	9.97893	0.532018	0.371776	0.440199		-	Yes	-	7.67213	6.41778	8.56517	0.641489	0.647533	0.792845
TraesCS1A02G121800		chr1A	135966918	135968561		Yes	Yes	Yes	14.9451	14.8344	14.1523	1.0034	0.990686	1.02979		-	Yes	-	7.78495	8.41774	7.38077	1.35902	1.15866	1.19157
TraesCS1A02G122000		chr1A	135968664	135971664		-	-	-	90.6163	87.8644	91.2002	0.339267	0.329213	0.334534		-	Yes	-	10.5805	9.20552	8.17926	1.49033	1.0476	0.988401
TraesCS1A02G122100		chr1A	136923917	136959905		Yes	Yes	Yes	4.15334	4.1964	5.02771	0.620051	0.552407	0.877816		-	-	-	1.43101	1.42795	1.43347	1.07572	1.1428	0.992235
TraesCS1A02G122200		chr1A	137231689	137235117		-	-	-	3.87626	3.82599	4.46817	0.634058	0.524778	0.564181		-	Yes	-	5.46156	5.38606	4.56654	0.674134	0.697286	0.612356
TraesCS1A02G122300		chr1A	137405754	137407677		Yes	-	-	1.05441	0.9521	1.20255	1.17076	1.05284	1.11082		-	-	-	-	-	-	-	-	-
TraesCS1A02G122500		chr1A	138225347	138228929		Yes	-	-	44.5057	42.287	40.2994	0.492869	0.438756	0.415782		-	-	-	194.402	193.199	200.603	0.481795	0.442121	0.42591
TraesCS1A02G122600		chr1A	139552792	139554589		-	-	-	-	-	-	-	-	-		Yes	-	-	1.37738	1.42949	0.880144	1.37558	2.64014	1.65288
TraesCS1A02G122800	TaHXK7-A1	chr1A	139637058	139641051		-	-	-	1.03779	0.969632	1.27541	1.22655	0.977823	0.990865		Yes	Yes	Yes	9.05975	8.20892	6.52998	0.661705	0.638403	0.658089
TraesCS1A02G122900		chr1A	140960645	140962849		Yes	-	-	1.0973	1.3735	1.45983	1.20868	0.939899	1.12117		-	-	-	0.661814	0.814844	0.671054	1.19034	1.38251	1.19808
TraesCS1A02G123000		chr1A	141432857	141437604		-	-	-	16.8639	17.9377	18.6693	0.30706	0.252197	0.279726		Yes	Yes	Yes	15.9695	16.4304	15.9605	0.420274	0.402843	0.372602
TraesCS1A02G123100		chr1A	142101442	142102131		Yes	Yes	Yes	11.1699	12.0141	12.9119	0.667867	0.490667	0.413504		-	Yes	-	23.4092	26.5426	22.8516	0.917439	0.843237	0.783994
TraesCS1A02G123700		chr1A	144552721	144553014		Yes	-	-	1.41664	1.20399	1.13635	1.63198	1.83875	1.80042		Yes	Yes	Yes	2.11849	2.00653	1.16478	1.32426	1.35436	1.26271
TraesCS1A02G123900		chr1A	145370882	145380980		-	Yes	-	7.69394	7.41692	8.05672	0.485129	0.378023	0.605992		-	Yes	-	10.3251	9.31243	9.48294	0.547885	0.572967	0.534442
TraesCS1A02G124100		chr1A	145988652	145989569		Yes	Yes	Yes	2.84197	2.25989	1.86252	0.767047	0.66324	0.730534		Yes	Yes	Yes	11.9627	12.446	10.1741	0.491003	0.550151	0.482513
TraesCS1A02G124200		chr1A	146630196	146634893		-	-	-	8.17652	8.75694	9.62769	0.532246	0.519667	0.527376		Yes	Yes	Yes	11.6602	13.8582	15.0154	0.545454	0.497398	0.483526
TraesCS1A02G124400		chr1A	146947225	146952752		-	-	-	15.2078	14.4991	14.124	0.450729	0.401309	0.381874		Yes	Yes	Yes	5.08713	4.13752	4.59249	0.716123	0.595494	0.610653
TraesCS1A02G124500		chr1A	146958998	146959708		-	-	-	-	-	-	-	-	-		-	Yes	-	1.47291	1.6023	1.83597	1.1019	1.22583	1.03183
TraesCS1A02G124600		chr1A	147353059	147357065		Yes	Yes	Yes	120.69	134.365	130.834	0.372584	0.320328	0.336004		Yes	Yes	Yes	135.88	142.341	143.407	0.284935	0.31837	0.26875
TraesCS1A02G124700		chr1A	147674771	147682838		Yes	-	-	1.06316	1.09367	1.05215	1.11723	0.958766	1.04926		-	-	-	1.97353	2.64923	2.43206	0.770637	0.704046	0.684966
TraesCS1A02G125100		chr1A	148608794	148610939		-	Yes	-	66.719	73.018	70.7566	0.436759	0.394724	0.435051		Yes	Yes	Yes	68.571	80.792	86.0354	0.555351	0.600408	0.485435
TraesCS1A02G125300		chr1A	148953747	148959478		-	Yes	-	7.33242	7.42232	8.07421	0.423828	0.477497	0.590337		-	Yes	-	3.90845	3.79597	3.89979	0.865939	0.619112	0.65389
TraesCS1A02G125400		chr1A	149352287	149356056		-	-	-	0.448099	0.4482	0.46071	1.23434	1.11703	1.13793		Yes	-	-	1.18944	1.29016	1.17569	0.918582	1.06812	0.796904
TraesCS1A02G125500		chr1A	149510430	149514777		Yes	-	-	1.52202	1.33628	2.09475	1.08027	0.804645	1.07758		-	Yes	-	5.27145	4.90794	6.0471	0.729899	0.787894	0.637201
TraesCS1A02G125700		chr1A	150006605	150008006		-	-	-	6.12611	6.33384	6.10279	0.600146	0.558294	0.528078		Yes	Yes	Yes	27.5229	30.7021	41.6988	0.458265	0.428945	0.387402
TraesCS1A02G125900		chr1A	150860542	150861336		-	Yes	-	2.69185	2.55406	2.85853	0.939586	0.801721	0.754333		-	-	-	-	-	-	-	-	-
TraesCS1A02G126000		chr1A	150890798	150895231		-	-	-	5.01674	5.22398	5.65181	0.493945	0.404869	0.442589		Yes	Yes	Yes	4.48082	4.63485	5.33871	0.700593	0.708106	0.549521
TraesCS1A02G126100		chr1A	150899371	150902341		-	Yes	-	7.5765	8.68444	8.72879	0.584814	0.48136	0.586824		Yes	Yes	Yes	9.01818	9.64686	10.5545	0.559729	0.491805	0.417619
TraesCS1A02G127400		chr1A	154574636	154577511		Yes	-	-	5.18985	4.43321	4.53656	0.510099	0.479459	0.538295		Yes	-	-	0.899156	0.905153	1.10361	1.41692	0.957541	1.00891
TraesCS1A02G127500		chr1A	154699585	154703820		-	-	-	-	0.502601	0.616479	-	1.11537	1.28037		Yes	-	-	1.66263	1.71344	2.07227	1.06176	1.00861	0.756232
TraesCS1A02G127800		chr1A	155143534	155144069		Yes	-	-	0.681261	0.725492	0.856238	1.34347	1.1182	1.18265		-	-	-	1.18634	1.50453	1.61713	1.29472	1.06685	0.945104
TraesCS1A02G127900		chr1A	155692288	155696863		-	-	-	0.580234	0.407037	0.604971	2.05579	1.59768	1.56014		Yes	-	-	1.20429	0.843362	1.06572	1.45999	1.56471	1.26606
TraesCS1A02G128100		chr1A	155840661	155858856		-	-	-	9.80763	9.85621	10.8521	0.348761	0.290391	0.2907		-	Yes	-	7.1713	7.00439	7.50665	0.536327	0.437861	0.490139
TraesCS1A02G128300		chr1A	157311796	157316818		-	-	-	10.9813	10.7476	11.9829	0.354908	0.436426	0.390709		-	Yes	-	19.4856	22.267	23.5159	0.399757	0.485245	0.425978
TraesCS1A02G128600		chr1A	157829158	157834887		Yes	-	-	10.5515	9.64985	11.9996	0.480163	0.427872	0.458697		-	Yes	-	8.54955	8.23195	10.3043	0.565798	0.719178	0.642158
TraesCS1A02G128900		chr1A	159516849	159528490		Yes	-	-	8.10421	8.59372	9.30138	0.459682	0.452265	0.359885		-	-	-	19.0913	18.2893	21.7518	0.471934	0.442558	0.409005
TraesCS1A02G129100		chr1A	163382073	163383979		-	Yes	-	33.1254	35.3317	34.7161	0.52262	0.377303	0.433527		Yes	Yes	Yes	43.7934	45.6147	53.7962	0.350312	0.377166	0.344294
TraesCS1A02G129200		chr1A	163392857	163397306		-	-	-	6.90339	6.6938	7.28336	0.384043	0.379183	0.370431		-	Yes	-	6.96183	6.18677	7.54085	0.553107	0.573191	0.471987
TraesCS1A02G129300		chr1A	164456207	164469307		Yes	Yes	Yes	2.72889	2.98366	3.48504	0.849488	0.756146	0.723724		Yes	Yes	Yes	2.14715	2.35441	2.52598	0.928925	1.02854	0.912828
TraesCS1A02G129400		chr1A	165171992	165179858		-	Yes	-	12.8421	14.42	14.2084	0.970497	0.741581	0.735174		-	-	-	13.0031	12.2951	13.7642	0.482176	0.447029	0.359943
TraesCS1A02G129500		chr1A	166315708	166322599		-	-	-	13.5357	13.0674	14.3077	0.338387	0.337192	0.31143		Yes	-	-	12.3271	12.2607	13.4659	0.436634	0.437665	0.396828
TraesCS1A02G129600		chr1A	167150357	167152680		-	Yes	-	3.7924	3.8136	4.15735	0.600139	0.564145	0.637413		Yes	Yes	Yes	2.56294	2.25159	2.95816	1.23445	1.08624	0.951212
TraesCS1A02G129800		chr1A	167802986	167804865		Yes	-	-	2.82562	3.09105	3.15635	0.676982	0.560811	0.526584		-	Yes	-	2.65087	2.47074	2.85865	0.824407	0.890818	0.609958
TraesCS1A02G130700		chr1A	168553548	168590194		Yes	-	-	1.82932	2.05224	2.1714	0.829046	0.697737	0.723692		Yes	Yes	Yes	2.46775	2.25031	2.27713	1.02494	0.906517	0.745066
TraesCS1A02G130800		chr1A	169643889	169654254		Yes	-	-	15.4065	16.2533	17.7714	0.389935	0.356054	0.439696		-	Yes	-	17.8403	16.7125	19.0615	0.5356	0.510234	0.460831
TraesCS1A02G130900		chr1A	171006669	171034612		Yes	-	-	4.85924	4.8051	5.32613	0.490472	0.420187	0.45995		-	Yes	-	1.74841	2.03367	1.71782	1.24665	1.17064	0.89567
TraesCS1A02G131000		chr1A	171453438	171469888		-	-	-	14.6164	14.306	15.8337	0.353081	0.336014	0.32555		-	Yes	-	14.3672	12.6678	13.3133	0.564635	0.64658	0.590154
TraesCS1A02G131200		chr1A	172185038	172193682		-	-	-	16.4867	15.6241	17.2496	0.302919	0.300529	0.278267		Yes	Yes	Yes	18.6083	16.1681	16.8048	0.425032	0.440158	0.44876
TraesCS1A02G131500		chr1A	175173230	175178988		Yes	-	-	27.9932	29.5937	30.9637	0.366414	0.358024	0.366304		Yes	-	-	28.671	30.1961	33.7611	0.328831	0.372838	0.335633
TraesCS1A02G131600		chr1A	176449533	176462644		-	-	-	2.48971	2.66808	2.9198	0.646723	0.481179	0.587104		Yes	Yes	Yes	3.1475	2.75472	2.73461	0.864974	0.76119	0.813368
TraesCS1A02G131900		chr1A	177465418	177472573		Yes	-	-	11.9441	12.2745	13.5762	0.566804	0.621164	0.617944		-	Yes	-	6.42523	5.39215	4.77044	0.866954	0.620644	0.675309
TraesCS1A02G132400		chr1A	179535750	179537296		-	Yes	-	50.7383	56.8612	47.399	0.910196	0.707559	0.693939		-	Yes	-	52.2276	57.8928	51.5422	0.511833	0.47449	0.512164
TraesCS1A02G132600		chr1A	181753577	181778463		-	-	-	22.0174	21.4922	23.7678	0.39258	0.358616	0.359266		-	Yes	-	20.8823	18.6233	21.388	0.540893	0.546753	0.550178
TraesCS1A02G133100		chr1A	185141232	185146180		-	-	-	70.2189	69.2474	64.1956	0.231421	0.186684	0.197862		Yes	-	-	17.573	17.3723	18.3916	0.434516	0.458834	0.361879
TraesCS1A02G133400		chr1A	186988726	186996675		-	-	-	24.2649	22.9993	25.0208	0.332459	0.337232	0.300809		Yes	-	-	30.641	31.8974	38.5841	0.520938	0.407744	0.436236
TraesCS1A02G133500		chr1A	188132555	188151899		-	-	-	32.8317	33.6101	33.2697	0.257037	0.256152	0.225592		Yes	-	-	1.12389	0.858394	1.42605	1.28601	1.15858	1.66085
TraesCS1A02G133700		chr1A	189710004	189722289		-	Yes	-	9.17506	7.8469	8.90374	0.573189	0.483713	0.580389		Yes	Yes	Yes	8.05782	8.10038	9.9025	0.617512	0.692565	0.522865
TraesCS1A02G133800		chr1A	189958446	189965406		-	Yes	-	4.82714	4.62297	5.13721	0.626224	0.598653	0.734461		-	Yes	-	5.04837	4.23179	4.58316	0.682037	0.891718	0.752876
TraesCS1A02G133900		chr1A	191855622	191862578		-	-	-	4.68166	4.32895	5.06518	0.62929	0.525175	0.799659		-	Yes	-	2.15619	2.17847	2.23775	0.95002	0.720116	0.959026
TraesCS1A02G134000		chr1A	193517325	193519141		-	-	-	41.0761	37.3949	35.1922	0.458296	0.383127	0.438788		-	Yes	-	23.6145	25.1536	25.047	0.471713	0.449657	0.424091
TraesCS1A02G134500		chr1A	201853521	201865435		Yes	Yes	Yes	8.39576	8.54076	9.59147	0.431139	0.373974	0.490374		-	Yes	-	2.53473	2.8303	2.76148	0.830362	1.09333	1.02901
TraesCS1A02G134600		chr1A	202071608	202101947		-	-	-	5.68658	5.97514	6.511	0.400122	0.430943	0.453925		-	Yes	-	5.77961	5.65008	5.94448	0.645802	0.678596	0.557208
TraesCS1A02G134800		chr1A	204826280	204828720		-	-	-	0.786382	0.614161	0.836204	1.14006	1.04638	0.96522		Yes	-	-	1.0828	1.12431	1.12304	1.07697	1.25457	1.21609
TraesCS1A02G135100		chr1A	206792054	206805538		Yes	-	-	1.80457	2.19979	1.89652	0.696826	0.681149	0.729042		-	-	-	3.94073	3.63184	3.42438	0.80859	0.693017	0.530577
TraesCS1A02G135300		chr1A	208208304	208219356		-	-	-	14.1191	14.1506	15.4353	0.388034	0.426718	0.389711		-	Yes	-	18.0728	16.7212	19.4974	0.581402	0.641192	0.656631
TraesCS1A02G135600		chr1A	208881364	208913608		-	Yes	-	8.4843	7.97109	9.2695	0.718896	0.683325	0.649612		-	Yes	-	3.74989	3.186	3.73334	1.09613	1.04342	1.30433
TraesCS1A02G135700		chr1A	209353872	209363066		-	-	-	32.9644	33.0271	35.5831	0.307556	0.361912	0.394059		-	Yes	-	5.89692	5.18902	5.86012	0.783717	0.715857	0.703669
TraesCS1A02G135800		chr1A	212017043	212018086		-	-	-	0.580183	0.684739	0.570425	1.1625	0.910607	1.28662		-	Yes	-	2.01467	2.14155	2.12277	0.993887	1.03309	0.857993
TraesCS1A02G136000		chr1A	212021777	212025958		Yes	-	-	1.69815	1.87671	2.05714	0.855298	0.817071	0.897807		-	-	-	0.820074	0.779444	0.880203	1.19147	1.40206	1.28209
TraesCS1A02G136200		chr1A	213902550	213933580		-	-	-	0.934048	1.04632	1.11747	1.12097	1.17497	1.35163		Yes	-	-	1.01444	0.810991	0.951481	1.09566	1.55458	1.07645
TraesCS1A02G136500		chr1A	217610380	217613638		-	-	-	16.3141	15.0698	15.277	0.387597	0.280324	0.326364		Yes	Yes	Yes	5.17401	5.16206	4.52537	0.705573	0.672893	0.601327
TraesCS1A02G136800		chr1A	218522815	218529362		-	-	-	10.9452	11.4894	11.996	0.364725	0.320856	0.341261		Yes	Yes	Yes	2.29791	2.5573	2.65119	0.965779	0.945129	0.731323
TraesCS1A02G136900		chr1A	219381070	219386762		Yes	Yes	Yes	2.58228	2.92248	3.18493	0.879414	0.711962	0.699049		Yes	-	-	1.93668	1.88624	2.15665	0.977631	0.954747	0.86972
TraesCS1A02G137000		chr1A	219894326	219900551		Yes	-	-	4.8872	5.41838	6.32434	0.627721	0.46115	0.478126		-	Yes	-	10.9792	10.4145	10.9725	0.593226	0.631021	0.597098
TraesCS1A02G137200		chr1A	221695704	221708351		-	-	-	2.91756	2.36781	2.80296	0.676078	0.605339	0.667363		Yes	-	-	1.08056	0.872305	1.15152	1.20342	1.49828	1.03939
TraesCS1A02G137300		chr1A	221708689	221709738		-	-	-	0.552183	0.598746	0.610465	1.07652	1.03765	1.31382		-	Yes	-	2.80977	3.06525	2.90161	0.860596	0.761611	0.806105
TraesCS1A02G137400		chr1A	222347195	222369765		-	-	-	8.34615	8.15362	9.06839	0.44603	0.382501	0.406597		Yes	-	-	10.7924	10.3459	10.0395	0.632911	0.482852	0.503088
TraesCS1A02G137500		chr1A	223443862	223455182		Yes	-	-	1.22444	1.02584	0.96891	1.10617	1.16767	0.837213		Yes	Yes	Yes	2.19341	2.40523	2.48434	1.26375	1.07238	1.12234
TraesCS1A02G137900		chr1A	225507558	225517408		Yes	-	-	9.90101	9.77028	10.4028	0.482837	0.4537	0.412685		-	Yes	-	10.8828	9.44554	11.7431	0.64371	0.58728	0.468081
TraesCS1A02G138000		chr1A	227257402	227268703		-	-	-	4.28835	4.20314	4.13357	0.652308	0.647282	0.647377		Yes	Yes	Yes	3.46181	4.05092	4.20583	0.82591	0.78791	0.677101
TraesCS1A02G138200		chr1A	230132869	230165911		-	-	-	6.34196	6.47799	7.13155	0.468022	0.414606	0.403707		-	Yes	-	5.3073	4.81454	5.57193	0.658971	0.727454	0.567393
TraesCS1A02G138400		chr1A	232066557	232074920		Yes	-	-	8.78017	9.40935	10.2417	0.401264	0.360233	0.384615		-	Yes	-	13.358	12.7671	14.7225	0.491677	0.665742	0.562845
TraesCS1A02G138600		chr1A	232333423	232344048		-	-	-	23.1015	22.6382	25.4319	0.307427	0.229113	0.247786		-	Yes	-	21.3114	19.0631	20.0126	0.508963	0.516458	0.392244
TraesCS1A02G139300		chr1A	234806287	234816413		-	-	-	19.3952	18.5638	20.9678	0.287599	0.27257	0.288941		Yes	-	-	13.676	14.967	15.979	0.405158	0.362166	0.345272
TraesCS1A02G139400		chr1A	235652144	235689004		-	Yes	-	5.80778	5.89887	7.12241	0.505344	0.377008	0.683468		-	Yes	-	6.36812	6.99336	6.34442	0.721605	0.707118	0.614145
TraesCS1A02G139600		chr1A	237327511	237330121		-	-	-	12.4743	12.0414	13.6653	0.416042	0.370721	0.389023		-	Yes	-	12.907	13.5866	13.1799	0.480169	0.515975	0.455674
TraesCS1A02G139900		chr1A	237744624	237746433		Yes	Yes	Yes	52.4917	54.1231	59.3539	0.519845	0.441425	0.480198		Yes	Yes	Yes	64.3372	61.7317	56.0541	0.473568	0.540979	0.567364
TraesCS1A02G140600		chr1A	238647818	238652541		-	-	-	1.10287	1.17633	1.37286	1.02025	0.908952	1.33471		-	Yes	-	1.28474	1.14134	1.54656	1.43879	1.37137	1.15648
TraesCS1A02G140700		chr1A	238656184	238670642		-	Yes	-	2.43397	2.04704	3.56395	1.16611	1.06596	1.9285		-	-	-	0.70979	0.658823	0.744431	1.94681	1.6117	1.9734
TraesCS1A02G140900		chr1A	238677153	238690883		Yes	-	-	3.85471	4.27198	4.77083	0.51101	0.515691	0.623711		Yes	Yes	Yes	3.89405	3.69196	3.94597	0.872769	0.66911	0.518378
TraesCS1A02G141100		chr1A	238999841	239002573		Yes	-	-	10.6284	10.6245	9.30428	0.608805	0.424026	0.546614		Yes	Yes	Yes	7.5268	7.33043	6.64701	0.594647	0.706521	0.481839
TraesCS1A02G141300		chr1A	239103017	239105291		-	-	-	0.451687	0.384841	0.59501	1.59377	1.26686	1.17213		Yes	Yes	Yes	2.697	2.12868	2.37319	0.914614	1.24296	0.914848
TraesCS1A02G141400		chr1A	239889251	239903200		Yes	-	-	8.04171	7.47087	7.68057	0.600289	0.583551	1.04666		Yes	Yes	Yes	15.7362	11.3635	10.0809	0.73211	0.728711	0.631514
TraesCS1A02G141500		chr1A	239905712	239906947		-	-	-	-	-	-	-	-	-		Yes	Yes	Yes	7.20204	7.39417	8.33576	0.55686	0.590752	0.581838
TraesCS1A02G141700		chr1A	241312953	241320936		-	-	-	16.5253	17.4083	18.0902	0.41117	0.343699	0.376704		Yes	Yes	Yes	20.1578	19.5234	18.0492	0.429636	0.411663	0.501025
TraesCS1A02G141900		chr1A	241677702	241679636		Yes	Yes	Yes	23.4453	25.6374	28.3208	0.619557	0.780438	0.698787		-	Yes	-	49.2986	48.7626	49.8836	0.516631	0.489943	0.562664
TraesCS1A02G142000		chr1A	241983247	241984668		-	Yes	-	12.1443	13.8069	11.7744	0.521043	0.395041	0.42072		-	-	-	-	-	-	-	-	-
TraesCS1A02G142200		chr1A	241993075	242013226		Yes	Yes	Yes	7.38336	6.78682	9.00906	0.493191	0.450581	0.547652		-	-	-	2.61151	2.41155	3.15282	0.796831	0.848324	0.779421
TraesCS1A02G142300		chr1A	242779679	242804845		Yes	-	-	2.3575	2.82427	2.98904	0.642187	0.487007	0.822898		Yes	-	-	2.14606	2.35139	2.88051	0.744421	0.709227	0.723148
TraesCS1A02G142400		chr1A	243160582	243163169		-	-	-	31.7617	35.2358	37.9406	0.474129	0.427775	0.480202		-	Yes	-	6.85086	6.72036	7.05632	0.692768	0.748891	0.67625
TraesCS1A02G142500		chr1A	243619556	243624661		-	-	-	9.82661	9.83478	10.6451	0.415729	0.296328	0.305007		-	Yes	-	5.01293	4.21541	5.48041	0.591947	0.75421	0.510221
TraesCS1A02G142700		chr1A	244500835	244503810		-	-	-	1.19422	1.12824	1.30654	1.18153	0.904797	1.19824		Yes	-	-	1.09598	0.921906	1.15645	1.06146	1.2088	1.03531
TraesCS1A02G142800		chr1A	244506828	244512895		Yes	-	-	1.53207	1.53714	1.75654	0.943013	0.961958	0.751959		-	-	-	0.77851	0.556088	0.633875	2.18706	1.26318	1.25534
TraesCS1A02G142900		chr1A	245115339	245118643		-	Yes	-	9.23898	9.26536	9.78665	0.520154	0.511886	0.479075		Yes	Yes	Yes	9.4317	9.40397	11.0095	0.558615	0.566594	0.461836
TraesCS1A02G143100		chr1A	245527134	245536774		Yes	Yes	Yes	2.44857	1.82878	2.46447	1.53176	1.82251	1.57336		-	-	-	1.35132	1.05751	1.38163	1.91828	1.79847	1.75244
TraesCS1A02G143200		chr1A	246127690	246130525		-	-	-	1.33637	1.42453	1.42845	1.08531	0.730249	0.776887		Yes	Yes	Yes	1.75979	1.74366	1.92007	1.05254	0.977807	0.933337
TraesCS1A02G143300		chr1A	246689896	246693276		Yes	-	-	22.1101	23.1997	24.5389	0.650265	0.671424	0.601563		-	Yes	-	87.5185	84.0601	85.8176	0.509382	0.502633	0.517196
TraesCS1A02G143400		chr1A	247311662	247347178		Yes	Yes	Yes	2.68076	2.90939	3.62735	0.752479	0.612595	0.61631		Yes	Yes	Yes	2.82428	2.77785	2.8773	0.806429	1.02497	0.722069
TraesCS1A02G143500		chr1A	248422288	248426924		-	Yes	-	1.54747	2.0797	1.82791	0.783823	1.22201	0.789728		Yes	-	-	1.92099	2.0278	2.39579	0.755238	0.841364	0.800786
TraesCS1A02G143700		chr1A	248611976	248614005		Yes	-	-	1.44778	1.30005	1.28416	1.10357	0.988926	1.02185		Yes	-	-	1.21352	1.55852	1.6813	1.68188	1.13292	0.940933
TraesCS1A02G143800		chr1A	248613931	248616991		Yes	-	-	8.27136	8.53797	9.03525	0.505716	0.371118	0.380831		Yes	Yes	Yes	3.35407	4.08497	4.55678	0.733454	0.662369	0.57157
TraesCS1A02G143900		chr1A	248877653	248881699		-	-	-	19.2317	19.3413	18.4777	0.354652	0.350492	0.3469		-	Yes	-	9.6997	9.62319	9.39879	0.488568	0.48385	0.414035
TraesCS1A02G144000		chr1A	249042636	249057221		Yes	Yes	Yes	3.17117	3.33978	3.70994	0.665105	0.583501	0.511724		Yes	Yes	Yes	4.11246	4.30107	4.57645	0.722284	0.785665	0.748259
TraesCS1A02G144700		chr1A	250550786	250554286		Yes	-	-	2.16096	2.42328	2.31621	0.79821	0.613449	0.667844		Yes	-	-	0.962763	1.20266	1.37017	1.07263	0.999349	0.913385
TraesCS1A02G144800		chr1A	251009017	251018858		-	Yes	-	10.2402	11.1191	10.8964	0.553879	0.495902	0.564223		-	-	-	0.412472	0.396166	0.51247	1.57302	1.6731	1.47679
TraesCS1A02G145000		chr1A	251334628	251341814		-	Yes	-	15.0429	16.1878	16.2458	0.830095	0.628508	0.59514		Yes	Yes	Yes	16.1122	15.63	20.72	0.53601	0.521652	0.422326
TraesCS1A02G145100		chr1A	251341931	251347298		-	-	-	-	-	-	-	-	-		-	Yes	-	3.32536	3.23139	3.70864	1.01738	1.08287	0.922768
TraesCS1A02G145500		chr1A	251558741	251564045		Yes	-	-	4.71097	4.79576	6.18705	0.652684	0.486704	0.491566		-	Yes	-	4.12934	4.22946	4.78811	0.778815	0.862689	0.751866
TraesCS1A02G145600		chr1A	251691125	251692365		Yes	-	-	2.15547	2.22612	2.00851	0.775828	0.726294	0.746444		Yes	-	-	1.12783	1.31431	1.32694	0.934468	1.0268	0.895648
TraesCS1A02G145800		chr1A	252281927	252286168		-	Yes	-	50.4158	44.2022	50.9207	0.851728	0.539756	0.598104		Yes	Yes	Yes	95.1444	76.4874	52.3711	0.7586	0.764341	0.598371
TraesCS1A02G146000		chr1A	252322646	252325156		-	-	-	-	-	-	-	-	-		Yes	Yes	Yes	12.9255	9.72887	8.96263	1.17236	1.18961	0.899076
TraesCS1A02G146200		chr1A	252502423	252518151		-	-	-	9.59926	10.3154	12.1088	0.343291	0.313587	0.319515		Yes	Yes	Yes	11.1045	9.8492	11.4318	0.512598	0.409576	0.424501
TraesCS1A02G146600		chr1A	252824562	252828693		-	-	-	21.5868	22.6357	23.0726	0.274709	0.234662	0.225655		Yes	-	-	13.2071	12.7559	13.2805	0.484695	0.447813	0.439125
TraesCS1A02G146900		chr1A	253378319	253384498		Yes	Yes	Yes	6.1775	6.21832	7.56652	0.608052	0.499713	0.557761		Yes	-	-	3.25514	3.13345	3.23655	0.8387	0.695934	0.74114
TraesCS1A02G147000		chr1A	253720397	253722229		-	Yes	-	149.995	166.253	161.527	0.501249	0.397549	0.437201		Yes	Yes	Yes	243.232	266.092	269.468	0.512736	0.552703	0.487121
TraesCS1A02G147400		chr1A	254375410	254383101		Yes	-	-	2.43711	2.98154	3.60064	0.760448	0.517612	0.504514		-	-	-	0.43343	-	0.365277	1.98636	-	1.54688
TraesCS1A02G147700		chr1A	254995705	254997527		-	-	-	5.69794	5.49896	5.59003	0.484911	0.400927	0.49593		-	Yes	-	9.83333	10.5272	10.3605	0.592888	0.517082	0.481627
TraesCS1A02G148400		chr1A	255898222	255900059		-	Yes	-	65.9485	70.8099	69.9321	0.422994	0.355655	0.377276		Yes	Yes	Yes	72.565	86.406	93.9277	0.411486	0.380431	0.343085
TraesCS1A02G149300		chr1A	256823681	256827995		-	Yes	-	9.35272	10.2618	9.24733	0.618465	0.466987	0.564676		-	Yes	-	7.15074	7.05892	7.40383	0.67232	0.743383	0.694468
TraesCS1A02G149500		chr1A	256964284	256968019		-	-	-	-	-	-	-	-	-		Yes	-	-	2.07813	2.12672	2.39141	0.885263	0.830099	0.837046
TraesCS1A02G149600		chr1A	256984103	256985437		-	-	-	-	-	-	-	-	-		Yes	-	-	1.34965	1.66915	1.959	1.09345	0.892927	0.793108
TraesCS1A02G149700		chr1A	257415277	257420268		-	-	-	7.57976	7.23009	7.56991	0.801505	0.673554	0.671447		-	Yes	-	40.5281	39.338	48.1049	0.633067	0.657134	0.570021
TraesCS1A02G149800		chr1A	257551797	257558525		Yes	Yes	Yes	14.746	14.3276	15.098	0.435982	0.453861	0.401945		-	-	-	2.01928	1.64727	2.09505	1.21617	0.875335	0.823962
TraesCS1A02G150100		chr1A	257573021	257574803		Yes	Yes	Yes	29.9608	25.5778	23.8661	0.688015	0.651048	0.727521		-	Yes	-	11.2104	9.83866	11.2566	0.887004	0.664373	0.760923
TraesCS1A02G150200		chr1A	257960004	257969311		Yes	Yes	Yes	5.26113	4.38368	3.35741	0.921761	0.88238	0.839183		-	Yes	-	2.13064	2.67983	2.57036	1.08815	1.01657	1.10865
TraesCS1A02G150400		chr1A	258157063	258162400		Yes	Yes	Yes	3.27143	3.16541	2.64557	0.916331	0.683982	0.935926		Yes	Yes	Yes	4.88009	5.36791	6.06649	0.710299	0.728605	0.586699
TraesCS1A02G150600		chr1A	258738361	258743663		Yes	-	-	23.6373	23.2309	26.7773	0.40267	0.351207	0.33059		Yes	-	-	32.8473	33.0202	37.7352	0.39978	0.372304	0.292775
TraesCS1A02G150800		chr1A	258857615	258862764		Yes	-	-	25.5638	24.0187	23.1739	0.39151	0.343858	0.39754		-	-	-	0.498196	0.35935	0.362394	1.74001	1.56785	1.85276
TraesCS1A02G150900		chr1A	258870778	258881439		Yes	Yes	Yes	11.2661	14.4291	25.3401	0.564778	0.463241	0.529231		-	-	-	-	-	-	-	-	-
TraesCS1A02G151000		chr1A	259049084	259051454		-	-	-	4.83195	4.52086	5.1843	0.40001	0.455786	0.382284		-	Yes	-	7.43415	6.97103	7.12928	0.565902	0.463918	0.45669
TraesCS1A02G151200		chr1A	259069861	259073887		-	-	-	1.14592	1.39228	1.31645	0.941812	0.764457	0.873812		Yes	Yes	Yes	2.67375	2.82915	2.91788	0.91289	0.941408	0.747511
TraesCS1A02G151400		chr1A	259994475	259997900		-	Yes	-	1.73033	1.55631	1.84258	1.4606	1.37116	1.67009		Yes	-	-	1.544	1.51994	1.60893	1.65127	1.46379	1.44556
TraesCS1A02G151600		chr1A	260836561	260840054		-	-	-	1.11252	1.18682	0.836818	0.859446	0.842911	0.886228		-	Yes	-	3.48487	3.66948	2.69577	1.19677	0.721869	0.801171
TraesCS1A02G151700		chr1A	260840507	260841094		Yes	-	-	1.65603	1.67949	1.98811	0.842789	0.689979	0.906799		Yes	Yes	Yes	1.82636	1.76306	1.8889	0.951852	0.882147	0.841821
TraesCS1A02G152000		chr1A	261130527	261136858		-	-	-	2.38068	2.37466	2.9484	0.557408	0.521239	0.651795		Yes	-	-	1.65813	1.42602	1.70283	1.20975	1.11362	0.979125
TraesCS1A02G152100		chr1A	261247064	261250437		-	Yes	-	3.38327	3.77193	3.4212	1.00382	0.780485	0.826001		-	-	-	-	-	-	-	-	-
TraesCS1A02G152300		chr1A	262009029	262014978		-	-	-	0.876773	0.72641	0.928567	1.14395	1.02405	1.18748		Yes	Yes	Yes	1.65767	1.60586	1.74839	1.35271	1.65364	0.966568
TraesCS1A02G152600		chr1A	262944345	262948015		Yes	-	-	0.461041	0.693289	2.21291	2.40689	1.88173	1.67707		-	-	-	-	-	-	-	-	-
TraesCS1A02G152800		chr1A	264213641	264217834		Yes	Yes	Yes	21.1329	28.7557	39.7424	2.41224	2.01882	1.89305		-	-	-	0.68947	0.717219	0.583839	2.89546	2.69287	2.20177
TraesCS1A02G152900		chr1A	265020365	265029656		Yes	-	-	5.21524	5.35976	5.99085	0.507594	0.456118	0.473		Yes	Yes	Yes	4.34447	4.6624	5.14018	0.599194	0.676776	0.602908
TraesCS1A02G153000		chr1A	265032750	265041635		Yes	Yes	Yes	5.39724	5.45387	3.99938	0.548329	0.560706	0.652073		-	-	-	-	-	-	-	-	-
TraesCS1A02G153100		chr1A	265645442	265650746		-	Yes	-	4.93078	4.95825	4.98037	0.703721	0.713633	0.64528		Yes	-	-	1.0051	1.08787	1.45781	1.25044	1.41174	0.908055
TraesCS1A02G153300		chr1A	267141927	267145892		-	-	-	12.4455	13.2732	13.6505	0.344618	0.325701	0.315492		-	Yes	-	11.2815	11.5066	12.5148	0.47693	0.42554	0.372802
TraesCS1A02G153600		chr1A	267177690	267181184		-	-	-	16.6058	15.4406	14.9843	0.344954	0.278375	0.349824		Yes	Yes	Yes	15.5581	12.3943	13.3419	0.451713	0.473162	0.421577
TraesCS1A02G154200		chr1A	268385375	268392359		-	Yes	-	7.43768	6.67427	7.48546	0.643954	0.498189	0.572553		-	Yes	-	5.45905	4.92771	5.73438	1.00958	0.875568	0.836871
TraesCS1A02G154300		chr1A	268914713	268929936		-	Yes	-	9.92183	9.54324	10.6322	0.473319	0.421998	0.37423		-	Yes	-	7.2326	7.06087	8.00254	0.761088	0.675344	0.739037
TraesCS1A02G154400		chr1A	268932112	268937108		-	-	-	47.3027	49.474	50.6428	0.341039	0.303774	0.319934		Yes	-	-	30.0298	31.8306	38.8174	0.419638	0.38186	0.363517
TraesCS1A02G154500		chr1A	269567621	269575789		Yes	Yes	Yes	2.1979	1.95778	2.13964	0.975263	0.680877	0.725529		-	-	-	1.00635	0.829892	0.82377	1.32808	1.18086	0.94123
TraesCS1A02G154700		chr1A	269993958	270008325		-	-	-	6.87299	7.00004	7.49103	0.392572	0.454044	0.379934		-	Yes	-	5.66439	5.42942	5.68082	0.693638	0.658873	0.612306
TraesCS1A02G155000		chr1A	271882592	271891529		Yes	-	-	2.45021	2.65726	2.4025	0.725701	0.567002	0.666825		-	-	-	-	-	-	-	-	-
TraesCS1A02G155200		chr1A	272611172	272613645		Yes	Yes	Yes	141.878	136.892	139.088	0.32626	0.285281	0.294324		Yes	Yes	Yes	115.816	125.001	139.774	0.391959	0.389999	0.301171
TraesCS1A02G155500		chr1A	274108134	274109975		-	-	-	3.91549	3.90511	4.13088	0.60297	0.525243	0.697779		-	Yes	-	7.23894	7.51088	6.84622	0.409898	0.469845	0.46006
TraesCS1A02G156100		chr1A	276802346	276805966		Yes	-	-	26.0066	27.6615	26.3174	0.612385	0.504842	0.550322		Yes	Yes	Yes	22.2095	16.9232	16.2923	0.854184	0.835218	1.03893
TraesCS1A02G156300		chr1A	276967792	276972330		Yes	Yes	Yes	9.84543	9.75842	10.5121	0.449998	0.452845	0.504419		-	Yes	-	3.1367	2.62024	2.9591	1.17389	0.940374	0.855637
TraesCS1A02G156400		chr1A	277074051	277078322		Yes	Yes	Yes	8.78666	7.02009	6.65786	0.685061	0.549822	0.535819		-	-	-	15.893	15.4945	16.8463	0.390689	0.366457	0.332216
TraesCS1A02G156500		chr1A	277629409	277642793		Yes	-	-	3.05208	2.46882	2.59726	0.675777	0.686975	0.613503		Yes	Yes	Yes	4.05189	4.06376	3.94816	0.705489	0.727843	0.588807
TraesCS1A02G156600		chr1A	278141903	278145724		Yes	-	-	1.21541	1.29672	1.42965	0.959954	0.952038	0.907147		-	-	-	2.04717	1.79495	2.28264	0.85867	1.00324	0.905149
TraesCS1A02G157500		chr1A	279732251	279742732		-	-	-	16.8919	16.221	17.4825	0.4615	0.367869	0.354439		-	Yes	-	9.5447	8.7748	10.7426	0.629994	0.618076	0.625055
TraesCS1A02G157600		chr1A	279824794	279831261		-	-	-	4.25305	4.23382	5.2426	0.571574	0.522555	0.538383		Yes	Yes	Yes	4.83301	4.98288	5.05616	0.765207	0.909592	0.702586
TraesCS1A02G157700		chr1A	279903221	279908684		-	-	-	4.15391	4.82316	5.33853	0.523809	0.538253	0.552757		Yes	-	-	18.6435	17.795	21.7494	0.481213	0.473445	0.373817
TraesCS1A02G157900		chr1A	280602664	280604294		Yes	-	-	15.315	15.1365	15.9029	0.476597	0.390245	0.399023		-	Yes	-	58.9974	61.7744	55.5115	0.348065	0.381648	0.372842
TraesCS1A02G158200		chr1A	281650040	281650769		-	-	-	0.827244	0.782018	0.849612	1.23804	1.08791	1.11219		-	Yes	-	1.50312	1.92683	1.92087	0.939259	0.902983	0.885346
TraesCS1A02G158300		chr1A	281656689	281659441		-	-	-	20.4886	21.6193	22.5042	0.290898	0.244136	0.212026		Yes	Yes	Yes	19.1239	22.212	22.7839	0.431815	0.431008	0.359994
TraesCS1A02G158400		chr1A	281887394	281895008		Yes	Yes	Yes	18.1588	18.3185	19.2038	0.60592	0.468864	0.629987		-	-	-	17.7501	17.4666	18.0247	0.436245	0.426344	0.408106
TraesCS1A02G158500		chr1A	282545207	282551529		Yes	-	-	9.92299	10.2437	11.5697	0.406387	0.360758	0.399731		Yes	Yes	Yes	6.42013	6.14828	8.15994	0.596882	0.591193	0.594793
TraesCS1A02G158600		chr1A	282552837	282554807		Yes	Yes	Yes	96.2504	83.2382	79.7381	0.58274	0.4131	0.508751		Yes	-	-	44.9194	42.247	35.0701	0.33365	0.339919	0.28643
TraesCS1A02G158700		chr1A	282695074	282702388		-	-	-	44.3982	43.8951	44.9377	0.384517	0.344984	0.34988		Yes	-	-	32.2729	33.3365	40.2629	0.474459	0.475233	0.45834
TraesCS1A02G158800		chr1A	283842907	283859515		-	-	-	15.267	14.6385	14.722	0.370399	0.328288	0.362116		Yes	Yes	Yes	4.3388	3.97616	4.05938	0.827278	0.786337	0.727462
TraesCS1A02G158900		chr1A	284143663	284151783		-	Yes	-	9.98673	8.92023	9.54519	0.603567	0.365387	0.453828		Yes	Yes	Yes	11.6475	9.42164	8.87073	0.622864	0.59494	0.557653
TraesCS1A02G159100		chr1A	284336841	284337272		-	Yes	-	23.1934	22.8661	22.2126	0.712533	0.609982	0.526805		Yes	Yes	Yes	66.9852	73.6694	77.6069	0.625331	0.628543	0.603913
TraesCS1A02G159200		chr1A	284902269	284905891		-	-	-	-	-	-	-	-	-		Yes	-	-	0.809295	0.552287	0.747668	1.70666	1.21412	1.30556
TraesCS1A02G159400		chr1A	285353558	285356244		-	-	-	1.24056	1.39535	1.60196	0.857957	0.69603	1.06612		Yes	-	-	1.3527	1.38425	1.22153	1.0041	0.9429	0.799185
TraesCS1A02G159500		chr1A	285980870	285986701		-	-	-	0.862545	0.654057	0.731065	1.08809	0.986337	1.11646		Yes	-	-	1.25476	1.11412	2.20478	1.11345	1.07887	0.772005
TraesCS1A02G159600		chr1A	286006369	286010711		-	-	-	1.44389	1.55419	1.31672	0.840123	0.894095	0.865286		-	Yes	-	3.86114	3.64728	4.96782	0.978286	0.894854	0.771626
TraesCS1A02G159700		chr1A	286915745	286916579		-	Yes	-	3.1492	3.5469	2.98838	2.1459	1.91157	2.15836		-	-	-	3.33374	4.32529	3.79875	2.03537	1.96681	2.02075
TraesCS1A02G160100		chr1A	287542004	287544129		Yes	-	-	1.28978	1.35419	1.4506	0.998919	0.760869	0.70925		-	-	-	1.20974	1.40313	1.26211	1.23596	1.08139	0.922958
TraesCS1A02G160200		chr1A	287681550	287684692		Yes	Yes	Yes	4.86936	5.04466	5.46864	0.514985	0.501529	0.737241		-	-	-	2.00237	1.62556	1.85108	1.02211	1.22723	0.979704
TraesCS1A02G160400		chr1A	287689089	287690564		Yes	-	-	4.49944	4.77303	5.65933	0.533415	0.487708	0.525961		Yes	Yes	Yes	5.86687	5.83351	6.74222	0.611205	0.607484	0.544454
TraesCS1A02G160500		chr1A	287691564	287702194		Yes	-	-	4.77643	4.4321	5.72785	0.547491	0.54173	0.544092		-	Yes	-	5.05038	4.79167	4.87153	0.685512	0.730735	0.732127
TraesCS1A02G160600		chr1A	288510416	288520871		-	-	-	6.14387	6.05938	6.75909	0.448023	0.3875	0.405277		Yes	Yes	Yes	6.73141	6.81082	6.98092	0.518182	0.572297	0.451626
TraesCS1A02G160700		chr1A	288862057	288872048		-	-	-	22.8963	23.0922	26.8864	0.346341	0.292333	0.249399		Yes	Yes	Yes	15.1762	13.6321	13.2276	0.613912	0.455711	0.466037
TraesCS1A02G160800		chr1A	289329784	289332889		Yes	Yes	Yes	4.75796	4.47064	4.51076	0.568005	0.616219	0.606052		Yes	Yes	Yes	5.08854	4.80172	4.68039	0.719631	0.63335	0.654355
TraesCS1A02G161000		chr1A	289346493	289351896		-	-	-	-	0.326399	-	-	1.44544	-		-	Yes	-	2.70165	2.88463	2.05307	0.654363	0.979127	0.722001
TraesCS1A02G161200		chr1A	290123278	290127360		-	Yes	-	6.50629	5.33524	5.93074	0.768774	0.814932	0.804189		-	-	-	-	-	-	-	-	-
TraesCS1A02G161300		chr1A	290198893	290201928		Yes	-	-	8.79069	8.58134	9.70415	0.476675	0.378722	0.556123		-	Yes	-	3.32138	3.3019	3.39785	0.890566	0.930546	0.622729
TraesCS1A02G161400		chr1A	290202033	290205001		-	-	-	2.68818	3.0511	2.63101	0.663048	0.622923	0.902599		Yes	Yes	Yes	6.95025	7.55854	4.99364	0.612036	0.659753	0.663924
TraesCS1A02G161900		chr1A	290554420	290556043		-	-	-	10.3664	10.9049	10.9603	0.444923	0.380752	0.448651		-	Yes	-	10.2657	8.5564	9.10109	0.614351	0.591613	0.510049
TraesCS1A02G162300		chr1A	291248717	291256425		Yes	-	-	3.45565	3.49722	2.97134	0.607023	0.479249	0.493763		-	Yes	-	4.96062	4.98646	5.08907	0.545026	0.687649	0.570822
TraesCS1A02G162400		chr1A	291561115	291565971		Yes	-	-	6.40416	6.75541	6.71861	0.585637	0.363444	0.390886		-	Yes	-	7.63487	7.79568	7.62321	0.524296	0.533778	0.505218
TraesCS1A02G162800		chr1A	292077984	292090267		-	-	-	10.8117	11.1051	11.6152	0.417638	0.394887	0.39058		-	Yes	-	9.73265	9.21184	9.20453	0.520749	0.581159	0.423767
TraesCS1A02G163200		chr1A	292878943	292881794		-	-	-	14.1776	13.956	15.8492	0.363972	0.396714	0.343628		Yes	-	-	20.7106	20.705	19.1297	0.351032	0.352326	0.303698
TraesCS1A02G163400		chr1A	293707856	293722849		Yes	-	-	4.38599	4.73837	5.55734	0.608696	0.554179	0.62056		-	Yes	-	5.57545	5.12248	5.60455	0.592979	0.658791	0.53402
TraesCS1A02G163700		chr1A	294037988	294042332		Yes	-	-	6.64188	7.47621	9.10817	0.558653	0.517907	0.550985		Yes	Yes	Yes	7.29945	6.90411	9.43368	0.959455	0.673137	0.579685
TraesCS1A02G163900		chr1A	295227960	295232820		Yes	-	-	5.56731	6.05613	6.70232	0.609349	0.482597	0.479389		Yes	Yes	Yes	6.79819	6.19059	7.69869	0.602903	0.58854	0.579852
TraesCS1A02G164000		chr1A	295458805	295464502		-	-	-	31.8314	30.6232	31.8686	0.285342	0.295819	0.309295		Yes	Yes	Yes	51.8409	49.6869	46.9732	0.44544	0.477722	0.420085
TraesCS1A02G164200		chr1A	295584873	295590785		-	-	-	12.3815	12.9589	15.2132	0.399535	0.304617	0.338135		Yes	-	-	21.336	21.8553	20.3096	0.384842	0.384168	0.312331
TraesCS1A02G164400		chr1A	296212249	296215494		Yes	-	-	2.79182	2.99708	3.25036	0.587479	0.627057	0.612687		-	Yes	-	2.91231	2.86071	2.95466	0.908332	0.690107	0.713284
TraesCS1A02G164600		chr1A	297376881	297381017		-	-	-	13.2954	12.9599	13.1495	0.399671	0.488038	0.36254		-	Yes	-	84.58	73.0096	76.633	0.391923	0.431764	0.416978
TraesCS1A02G164700		chr1A	297696462	297700859		-	-	-	16.2001	16.1281	17.131	0.300085	0.308462	0.3244		Yes	-	-	1.40307	1.04653	1.31713	1.87529	1.42995	1.1096
TraesCS1A02G164800		chr1A	297744935	297751007		-	-	-	20.817	21.8895	20.2741	0.371866	0.332706	0.366944		Yes	-	-	26.2588	26.1097	29.29	0.448704	0.394544	0.429667
TraesCS1A02G164900		chr1A	297872019	297874932		Yes	Yes	Yes	28.768	26.7845	25.8618	0.486117	0.428951	0.562514		Yes	Yes	Yes	7.12553	6.41065	6.35542	0.677335	0.593856	0.743124
TraesCS1A02G165300		chr1A	298034053	298037445		-	Yes	-	6.77375	6.15089	7.18579	0.595778	0.63191	0.706361		Yes	Yes	Yes	14.1599	11.8853	12.8089	0.69098	0.832335	0.736763
TraesCS1A02G165400		chr1A	298105708	298107333		-	Yes	-	5.87115	6.70284	5.89983	1.69426	1.54694	1.8998		-	-	-	1.23957	0.810853	0.749287	1.15949	1.10294	1.49799
TraesCS1A02G165500		chr1A	298108442	298116154		-	Yes	-	16.993	17.4203	19.786	0.853535	0.83572	0.847167		-	Yes	-	41.7378	38.8531	40.8473	0.857668	0.839064	0.82262
TraesCS1A02G165600		chr1A	298152317	298155073		-	-	-	0.538126	0.541622	0.611056	1.27544	0.986015	2.02192		Yes	Yes	Yes	3.08607	3.25989	3.49717	0.850342	0.926751	0.7644
TraesCS1A02G165700		chr1A	298557743	298566718		-	Yes	-	225.723	205.994	195.737	0.319865	0.275371	0.314427		Yes	Yes	Yes	0.807253	0.808828	1.17679	1.68628	1.50959	1.4654
TraesCS1A02G165800		chr1A	298601923	298610934		-	-	-	48.0463	52.3596	48.4392	0.332432	0.230014	0.244651		-	Yes	-	10.9009	9.8795	10.7939	0.712456	0.57109	0.464497
TraesCS1A02G165900		chr1A	298613622	298615547		Yes	Yes	Yes	2.97045	3.0968	2.85994	0.927758	0.805755	0.824803		-	Yes	-	6.53316	5.61913	6.33774	0.984906	0.741115	0.822871
TraesCS1A02G166100		chr1A	298635520	298636647		-	Yes	-	51.9776	47.7927	55.1038	0.606293	0.576732	0.650348		-	Yes	-	4.39515	4.69913	3.10559	0.964453	0.936309	0.959711
TraesCS1A02G166200		chr1A	298646085	298646780		-	Yes	-	3.79021	3.78014	4.98016	0.670764	0.725256	0.968716		Yes	-	-	0.675201	0.60596	0.45715	1.60652	1.9856	1.61382
TraesCS1A02G166600		chr1A	299424945	299426015		-	Yes	-	12.2086	12.4412	14.3259	0.966688	0.882734	0.932291		Yes	Yes	Yes	20.9364	17.8088	17.8909	0.612414	0.66234	0.643264
TraesCS1A02G166900		chr1A	299624485	299657841		-	Yes	-	6.42448	6.582	6.36973	0.592009	0.439608	0.606486		Yes	Yes	Yes	7.18403	6.27287	6.32532	0.662458	0.70227	0.667313
TraesCS1A02G167100		chr1A	300003984	300004745		-	Yes	-	15.7775	14.0899	14.8366	0.934501	0.977338	0.926889		-	Yes	-	23.7123	24.0024	22.1988	0.928346	0.936801	0.919978
TraesCS1A02G167400		chr1A	300107115	300111644		Yes	Yes	Yes	5.47102	5.74481	6.25626	0.697232	0.548715	0.558591		-	-	-	6.7643	6.42697	8.1486	0.527763	0.457698	0.405839
TraesCS1A02G167600		chr1A	300395391	300396164		Yes	-	-	5.89669	5.79164	5.51388	0.488809	0.470642	0.415686		Yes	Yes	Yes	10.1696	10.5594	11.5217	0.574018	0.541808	0.469334
TraesCS1A02G168100		chr1A	300856554	300860113		Yes	Yes	Yes	18.012	18.005	16.6248	0.554033	0.519588	0.582738		Yes	-	-	1.3745	1.43648	1.59189	0.921469	0.922521	0.889802
TraesCS1A02G168400		chr1A	301128322	301134198		Yes	-	-	14.2806	13.6516	13.2764	0.467252	0.467784	0.461013		-	-	-	-	-	-	-	-	-
TraesCS1A02G168600		chr1A	301196754	301200037		Yes	Yes	Yes	78.0255	72.7641	75.8131	0.520406	0.483241	0.567149		Yes	Yes	Yes	47.4296	48.9409	53.7186	0.500718	0.584191	0.498128
TraesCS1A02G169000		chr1A	301781001	301784189		-	-	-	29.1893	29.8725	30.6512	0.297762	0.305282	0.295622		Yes	Yes	Yes	48.2336	43.9949	42.1855	0.402428	0.426346	0.409455
TraesCS1A02G169100		chr1A	301857603	301864368		Yes	-	-	13.7754	14.9114	16.98	0.37843	0.324103	0.384872		Yes	Yes	Yes	14.9927	17.0094	18.1108	0.516141	0.466557	0.413507
TraesCS1A02G169200		chr1A	301894091	301894885		-	-	-	0.631794	0.756258	0.840407	1.31824	0.958572	0.996504		Yes	Yes	Yes	1.38083	1.30182	1.19125	1.04722	1.04353	0.869324
TraesCS1A02G169300		chr1A	301895909	301899325		Yes	Yes	Yes	5.95172	5.96331	6.68555	1.30552	0.991295	1.19812		Yes	Yes	Yes	12.4531	9.96595	7.95649	1.37823	1.23948	1.25941
TraesCS1A02G169500		chr1A	302198139	302200788		Yes	-	-	3.26887	3.37002	4.03677	1.06708	0.97275	0.926024		Yes	Yes	Yes	2.63616	2.53039	2.7577	0.784199	0.920968	0.803149
TraesCS1A02G169600		chr1A	302628523	302639166		Yes	-	-	6.63243	6.34486	6.33363	0.47693	0.363828	0.48258		-	Yes	-	3.05626	3.41533	3.41906	0.792993	0.708289	0.732219
TraesCS1A02G170000		chr1A	303727691	303730110		Yes	-	-	33.6477	34.0363	30.2768	0.452597	0.448444	0.416379		-	Yes	-	76.3244	81.0308	73.4841	0.438133	0.423864	0.367672
TraesCS1A02G170100		chr1A	303849555	303852175		Yes	Yes	Yes	4.3374	5.34683	5.00254	0.879328	0.790804	0.734762		-	Yes	-	3.80548	4.57614	5.01344	0.703302	0.650532	0.555906
TraesCS1A02G170300		chr1A	304029764	304036570		Yes	-	-	5.00429	5.60895	5.27165	0.539515	0.395031	0.537702		-	Yes	-	5.26883	4.84143	5.01048	0.846699	0.787744	0.573883
TraesCS1A02G170400		chr1A	304036915	304047086		-	-	-	15.1219	15.8939	17.0185	0.339459	0.281042	0.303077		Yes	-	-	17.0186	15.4069	15.9055	0.492221	0.471052	0.410997
TraesCS1A02G170600		chr1A	305004105	305006483		-	-	-	47.0812	45.8388	47.2889	0.327669	0.299542	0.272394		-	Yes	-	9.19055	9.64988	10.6629	0.455683	0.49252	0.420348
TraesCS1A02G170700		chr1A	305326594	305329046		Yes	Yes	Yes	4.16618	3.89938	3.81274	1.15471	0.982387	1.11131		-	Yes	-	2.04245	2.09012	1.73218	1.06428	1.12836	1.02377
TraesCS1A02G170900		chr1A	305363883	305368036		-	-	-	14.7505	14.4023	14.9378	0.421231	0.368411	0.430555		Yes	-	-	13.8505	14.3632	15.2374	0.446734	0.471506	0.39525
TraesCS1A02G171000		chr1A	305606261	305608388		Yes	Yes	Yes	60.7539	63.0876	53.9676	0.449533	0.441613	0.403172		-	-	-	-	-	0.45873	-	-	2.3605
TraesCS1A02G171200		chr1A	306117845	306120605		-	-	-	0.932318	0.968396	0.785871	1.01918	0.868021	1.12968		-	Yes	-	1.39175	1.4783	1.76136	1.20055	1.39594	1.27227
TraesCS1A02G171300		chr1A	306149738	306151032		-	-	-	0.76335	0.753665	0.719005	1.16458	1.00477	1.12082		Yes	Yes	Yes	2.76816	3.80731	4.32335	0.690594	0.821933	0.702007
TraesCS1A02G171400		chr1A	306550347	306553305		Yes	-	-	6.24384	6.34308	5.99472	0.434301	0.462928	0.438847		Yes	Yes	Yes	15.1645	16.9767	17.2566	0.428785	0.389444	0.386339
TraesCS1A02G171500		chr1A	306637419	306644050		-	-	-	1.53903	1.3862	1.46116	1.00234	0.863691	0.988423		-	Yes	-	2.32623	2.9576	2.42675	0.939022	0.951439	0.789151
TraesCS1A02G171700		chr1A	307033684	307041155		Yes	-	-	2.8184	3.28971	4.06433	0.549392	0.463126	0.541618		Yes	Yes	Yes	2.7418	2.88322	3.02916	0.865568	0.893597	0.608599
TraesCS1A02G172100		chr1A	307700421	307707523		-	Yes	-	4.40653	4.47271	4.48871	0.659441	0.6846	0.546174		-	Yes	-	3.56689	3.36566	3.0764	0.816231	1.13866	0.657702
TraesCS1A02G172300		chr1A	308202620	308211209		-	-	-	4.54072	4.95479	4.94467	0.487345	0.421718	0.380506		-	Yes	-	3.85044	3.32541	4.05393	0.926046	0.757128	0.624218
TraesCS1A02G172700		chr1A	308571441	308576188		Yes	-	-	29.0881	27.428	26.7675	0.379377	0.335986	0.335304		-	-	-	0.93037	0.894959	0.708954	1.02283	1.01568	1.20105
TraesCS1A02G173000		chr1A	308810895	308811509		-	-	-	1.69639	1.69796	1.79109	1.08306	0.771526	0.869864		-	Yes	-	14.6185	14.7119	14.5395	0.595433	0.622104	0.633441
TraesCS1A02G173200		chr1A	308950731	308953133		-	-	-	51.5432	47.8445	47.2832	0.255227	0.232634	0.295323		Yes	Yes	Yes	12.639	13.4279	14.8451	0.478378	0.438664	0.339044
TraesCS1A02G173400		chr1A	309401615	309403447		-	Yes	-	96.362	97.3043	105.845	0.341435	0.351893	0.303578		-	Yes	-	55.2809	58.6867	60.1688	0.335538	0.291147	0.320029
TraesCS1A02G173500		chr1A	309457556	309466082		-	-	-	18.4686	18.1697	17.9315	0.415173	0.365761	0.397085		Yes	Yes	Yes	23.1611	21.9651	18.4358	0.403789	0.364401	0.472629
TraesCS1A02G173800		chr1A	309789692	309791565		Yes	Yes	Yes	15.019	12.0391	12.6304	0.742887	0.798949	0.824975		Yes	Yes	Yes	8.27874	5.88361	2.67286	0.870298	0.980609	0.937268
TraesCS1A02G174500		chr1A	311812456	311816565		Yes	-	-	1.58108	1.7426	2.14491	0.93332	0.954115	0.754887		-	-	-	1.77421	1.49932	1.77787	0.988017	1.12027	0.815954
TraesCS1A02G174600		chr1A	311846860	311852943		-	-	-	19.3122	20.5242	23.0496	0.337633	0.278538	0.309543		-	Yes	-	25.4417	24.0981	25.9361	0.396784	0.380332	0.344482
TraesCS1A02G174700		chr1A	312159893	312161436		Yes	Yes	Yes	65.8547	67.5538	71.4661	0.496136	0.464597	0.423867		Yes	Yes	Yes	160.92	163.003	128.581	0.446097	0.439206	0.496522
TraesCS1A02G174800		chr1A	312583634	312585896		-	-	-	-	-	-	-	-	-		-	Yes	-	1.02694	1.2611	1.11241	2.31232	1.4431	1.34556
TraesCS1A02G175000		chr1A	312772250	312777623		Yes	-	-	7.76683	7.68191	8.18143	0.529522	0.419748	0.507482		Yes	Yes	Yes	5.20905	5.49653	6.81849	0.72588	0.766416	0.621082
TraesCS1A02G175200		chr1A	313161460	313162228		-	Yes	-	148.773	152.156	174.51	0.561617	0.364964	0.377321		Yes	Yes	Yes	1.51748	1.90645	2.25507	2.04504	1.3981	1.25465
TraesCS1A02G175500		chr1A	313489231	313491849		Yes	Yes	Yes	39.2382	42.1683	53.5668	1.00477	1.01767	0.982908		Yes	Yes	Yes	92.4795	69.0367	60.2082	0.670767	0.631402	0.589779
TraesCS1A02G175700		chr1A	313738701	313751739		-	Yes	-	2.83261	3.24456	3.06718	0.714083	0.642097	0.600324		Yes	Yes	Yes	4.99079	3.91571	4.07762	1.14644	0.845412	0.785309
TraesCS1A02G175800		chr1A	313744357	313748524		Yes	-	-	7.99705	8.05387	8.35466	0.467243	0.449509	0.375312		-	Yes	-	7.96841	7.10188	7.65182	0.639209	0.527147	0.542904
TraesCS1A02G175900		chr1A	313903531	313912668		Yes	-	-	9.19365	8.78144	9.39895	0.434878	0.369301	0.399626		Yes	Yes	Yes	8.19136	9.05295	8.85392	0.498244	0.463175	0.434307
TraesCS1A02G176000		chr1A	314428210	314432375		-	-	-	1.52841	1.87292	1.41641	0.976374	0.880348	0.93199		Yes	Yes	Yes	1.72637	2.15475	2.59256	1.11229	1.20209	0.934772
TraesCS1A02G176500		chr1A	315834151	315840625		-	-	-	25.4883	26.0497	30.3196	0.282492	0.208701	0.257725		Yes	Yes	Yes	30.1771	29.8802	29.3916	0.400993	0.4921	0.409111
TraesCS1A02G176700		chr1A	317810558	317815516		-	-	-	22.3765	22.3736	22.4646	0.424892	0.353404	0.285257		-	Yes	-	28.1658	26.7161	26.1377	0.717994	0.744992	0.609257
TraesCS1A02G176800		chr1A	319077590	319079046		-	Yes	-	7.40057	8.20543	8.2542	0.761885	0.687815	0.834483		Yes	-	-	3.0145	3.51506	4.41092	0.820315	0.748318	0.68855
TraesCS1A02G176900		chr1A	319079823	319087554		-	-	-	3.19398	2.94246	3.29928	0.754211	0.547467	0.689256		Yes	Yes	Yes	2.85942	2.21521	1.98738	1.65468	1.36139	1.23055
TraesCS1A02G177000		chr1A	319319608	319321634		-	Yes	-	5.94564	6.09633	5.51977	0.794464	0.543037	0.542596		-	Yes	-	9.84016	9.94001	9.77447	0.512514	0.561222	0.520931
TraesCS1A02G177300		chr1A	319887494	319889455		Yes	-	-	16.265	16.6675	14.4868	0.410389	0.41348	0.43093		-	Yes	-	13.4084	13.0627	11.5931	0.509815	0.493227	0.557643
TraesCS1A02G177400		chr1A	320222699	320224716		Yes	-	-	9.74009	9.40008	9.32286	0.504337	0.382769	0.355037		-	-	-	19.091	19.0858	19.0782	0.380553	0.382938	0.398844
TraesCS1A02G177500		chr1A	320333954	320338598		Yes	Yes	Yes	2.26658	2.22213	2.62251	1.23224	1.06324	1.13622		Yes	Yes	Yes	6.18762	6.34473	9.40099	0.760689	0.730786	0.700914
TraesCS1A02G177600		chr1A	320479860	320494972		-	-	-	5.26817	6.10668	5.91451	0.528242	0.423788	0.530469		-	Yes	-	5.57161	5.60457	5.87393	0.700695	0.685696	0.645653
TraesCS1A02G177700		chr1A	320891334	320895519		Yes	-	-	6.95121	7.00465	7.75145	0.521745	0.487239	0.472557		-	-	-	7.72583	7.63084	7.92157	0.622081	0.517419	0.520934
TraesCS1A02G177800		chr1A	321110255	321114846		-	-	-	16.7292	16.6544	15.7279	0.494308	0.471039	0.654645		-	Yes	-	122.625	112.174	114.562	0.431656	0.411743	0.373225
TraesCS1A02G178100		chr1A	321402669	321412297		Yes	-	-	1.24144	1.47425	1.81309	0.976381	0.802921	1.44408		-	-	-	1.82425	1.49038	1.76182	1.02269	1.03361	1.08523
TraesCS1A02G178200		chr1A	321875570	321880525		-	-	-	15.9286	14.7735	16.0791	0.516652	0.459669	0.398687		Yes	Yes	Yes	10.967	10.7177	11.7245	0.576067	0.70746	0.69002
TraesCS1A02G178300		chr1A	321882666	321888083		-	-	-	12.6027	13.1869	14.15	0.455322	0.442662	0.426428		Yes	Yes	Yes	6.78722	6.35307	7.46858	0.554474	0.492398	0.504221
TraesCS1A02G178400		chr1A	322572275	322577295		-	-	-	2.09733	2.36334	2.38957	0.806824	0.789706	0.68265		Yes	Yes	Yes	1.40903	1.26488	1.78152	1.07488	1.02077	1.16681
TraesCS1A02G178600		chr1A	323189959	323192810		-	-	-	0.846707	0.899171	1.07694	0.990449	0.808539	0.77799		Yes	-	-	2.82323	2.51746	2.86277	0.90192	0.671065	0.666585
TraesCS1A02G178700		chr1A	323204777	323205142		Yes	-	-	0.893143	0.826184	0.680794	1.12759	1.14549	1.72367		Yes	Yes	Yes	11.3283	11.3423	11.5814	0.73621	0.568802	0.588738
TraesCS1A02G178800		chr1A	323286030	323286972		-	-	-	-	-	-	-	-	-		Yes	Yes	Yes	1.02233	1.44693	1.44407	1.32165	1.39446	1.48232
TraesCS1A02G179000		chr1A	323642134	323645469		-	-	-	64.7491	67.2994	63.8916	0.305428	0.275905	0.304825		Yes	-	-	70.1675	71.6669	80.0397	0.334843	0.253677	0.233539
TraesCS1A02G179400		chr1A	324490254	324490897		Yes	Yes	Yes	14.0345	13.2485	11.5452	0.847274	0.853043	0.711837		-	Yes	-	140.407	156.895	136.908	0.461237	0.456788	0.455922
TraesCS1A02G179700		chr1A	324609925	324619770		-	Yes	-	6.5595	6.66543	7.09227	0.49624	0.489589	0.544277		-	-	-	0.741742	0.742397	1.01938	1.35704	1.4256	1.80879
TraesCS1A02G180000		chr1A	325032422	325033066		Yes	Yes	Yes	2.948	2.4742	1.8066	1.0105	0.963187	0.851975		-	-	-	0.319439	-	0.273295	1.87449	-	2.07802
TraesCS1A02G180100		chr1A	325036711	325039829		-	-	-	9.24527	9.83638	11.5427	0.361031	0.413957	0.41136		Yes	-	-	13.0082	12.6325	13.6124	0.408414	0.394836	0.376918
TraesCS1A02G180200		chr1A	325039828	325049320		-	-	-	3.34788	3.66488	4.0135	0.578772	0.478577	0.580225		-	Yes	-	3.70504	3.36584	3.59436	0.714035	1.0995	0.658264
TraesCS1A02G180300		chr1A	325049787	325054523		Yes	-	-	11.6238	11.5222	12.5656	0.351575	0.30414	0.325735		-	Yes	-	13.2094	14.3609	13.7747	0.377887	0.418364	0.373852
TraesCS1A02G180500		chr1A	326199377	326214529		-	-	-	9.14423	8.86805	10.4437	0.440615	0.366363	0.577678		-	Yes	-	13.4714	12.3678	13.2314	0.59284	0.584873	0.516613
TraesCS1A02G180700		chr1A	326217184	326217978		-	-	-	-	-	-	-	-	-		-	Yes	-	1.6492	1.76455	1.89629	1.19399	0.925233	0.841204
TraesCS1A02G181000		chr1A	327014865	327018031		-	Yes	-	11.9752	8.97628	8.92686	1.80334	1.32389	0.820552		Yes	Yes	Yes	7.55631	6.23526	4.35779	0.911732	0.793897	0.778019
TraesCS1A02G181100		chr1A	327271128	327271956		-	Yes	-	9.09435	10.9354	8.67061	0.799481	0.465844	0.544698		-	Yes	-	12.5346	14.026	9.58706	0.730219	0.729489	0.726493
TraesCS1A02G181400		chr1A	327525812	327529786		-	-	-	13.8375	13.0988	14.6234	0.279952	0.255079	0.263714		Yes	-	-	13.4681	13.2348	13.8767	0.512574	0.383339	0.355003
TraesCS1A02G181600		chr1A	327531617	327537648		Yes	Yes	Yes	2.41084	2.1701	2.33037	0.707883	0.685751	0.677644		-	Yes	-	1.9693	1.73222	2.06084	0.866917	0.858322	0.8111
TraesCS1A02G181900		chr1A	328244901	328253761		-	-	-	15.5149	15.1812	17.0276	0.456575	0.427561	0.467658		-	Yes	-	23.0049	18.7619	19.6549	0.597672	0.559818	0.590594
TraesCS1A02G182000		chr1A	328254105	328257572		-	Yes	-	3.89303	3.99957	4.21304	0.61558	0.597165	0.595345		-	Yes	-	3.659	3.16542	3.2001	1.14106	0.865007	0.738927
TraesCS1A02G182100		chr1A	328713963	328716840		Yes	-	-	7.6706	7.25756	7.06146	0.470401	0.437785	0.480061		Yes	Yes	Yes	26.4725	25.9725	32.1595	0.445862	0.434438	0.407826
TraesCS1A02G182300		chr1A	329246841	329249014		-	Yes	-	13.9706	14.7415	14.3297	0.439204	0.483803	0.489569		Yes	-	-	31.1816	28.8614	27.8077	0.391139	0.362201	0.383181
TraesCS1A02G182400		chr1A	330082865	330086356		Yes	-	-	24.4483	28.2016	29.5865	0.461041	0.36036	0.354259		Yes	-	-	21.024	22.0264	28.8125	0.467627	0.357914	0.313905
TraesCS1A02G182500		chr1A	330087479	330088533		-	-	-	7.79559	8.59503	8.5407	0.500164	0.326002	0.405261		Yes	Yes	Yes	11.2521	12.4105	14.0772	0.393936	0.422362	0.498808
TraesCS1A02G182600		chr1A	330686907	330688311		-	-	-	1.86359	1.83453	2.02529	0.753457	0.856277	0.785343		-	Yes	-	3.35675	4.61339	3.52997	0.555184	0.72265	0.600921
TraesCS1A02G182700		chr1A	330765992	330771472		Yes	-	-	9.19776	9.21083	9.88446	0.479583	0.359373	0.33217		Yes	-	-	11.7376	10.9137	10.646	0.539578	0.517177	0.466037
TraesCS1A02G182800		chr1A	331233350	331237174		Yes	-	-	1.06742	1.26427	1.33472	0.940375	0.804491	0.887472		Yes	-	-	0.80133	0.993976	1.15292	1.16466	1.09219	0.85001
TraesCS1A02G182900		chr1A	331269459	331273223		-	-	-	3.81604	3.84638	4.75974	0.549793	0.596254	0.499485		Yes	Yes	Yes	3.44671	3.08523	3.19022	0.854292	0.75054	0.582995
TraesCS1A02G183000		chr1A	331318066	331323293		Yes	Yes	Yes	9.75485	9.96226	10.9582	0.546987	0.520062	0.565147		Yes	Yes	Yes	33.6839	32.1677	29.746	0.502313	0.537059	0.468743
TraesCS1A02G183100		chr1A	331517066	331518993		-	-	-	-	-	-	-	-	-		Yes	-	-	0.965203	1.22432	1.89931	0.921608	0.979557	0.897037
TraesCS1A02G183400		chr1A	333134461	333139522		Yes	Yes	Yes	6.00088	5.54453	5.39848	0.63786	0.5122	0.620069		Yes	Yes	Yes	4.11545	3.84102	3.97098	0.848021	0.88583	0.708115
TraesCS1A02G183800		chr1A	333613054	333627407		-	-	-	30.8593	29.414	32.752	0.413263	0.39476	0.402939		Yes	Yes	Yes	29.5079	25.5968	24.6207	0.477568	0.55408	0.447271
TraesCS1A02G183900		chr1A	333868548	333886602		-	Yes	-	9.42309	8.35885	10.0095	0.643895	0.48925	0.837362		Yes	Yes	Yes	9.37015	8.7822	7.07203	0.614357	0.708851	0.645766
TraesCS1A02G184000		chr1A	333913245	333914392		-	-	-	0.51288	0.819328	0.545842	1.20882	1.21723	1.61028		Yes	-	-	1.25968	0.924204	1.05511	2.172	1.4288	1.01879
TraesCS1A02G184100		chr1A	333917302	333922150		Yes	-	-	6.82289	7.55748	8.16078	0.460955	0.408894	0.409905		-	Yes	-	9.04749	9.4046	10.2165	0.505511	0.478649	0.428487
TraesCS1A02G184500		chr1A	334446534	334452739		-	-	-	24.81	24.7799	24.4061	0.285491	0.232935	0.235644		-	Yes	-	32.7886	31.8396	30.9208	0.397898	0.504797	0.380066
TraesCS1A02G184600		chr1A	335012317	335034601		-	-	-	12.1396	12.2121	12.7527	0.302007	0.3008	0.307579		Yes	Yes	Yes	11.3076	11.3596	11.8564	0.469879	0.504063	0.498108
TraesCS1A02G184900		chr1A	335545266	335546654		-	-	-	14.5857	13.5942	13.9684	0.470891	0.444415	0.461267		Yes	Yes	Yes	9.64698	9.00326	7.95374	0.460525	0.402583	0.428671
TraesCS1A02G185300		chr1A	335830804	335836281		-	-	-	0.681335	0.517089	0.5258	1.30493	1.24868	1.24078		-	Yes	-	1.03377	1.00822	1.03047	1.84917	1.64693	1.18139
TraesCS1A02G185700		chr1A	336475940	336477065		-	Yes	-	8.31603	7.74124	5.78409	1.04994	0.74765	0.750755		Yes	-	-	0.582917	0.977249	0.85397	1.4878	1.3717	1.53043
TraesCS1A02G185900		chr1A	337007361	337017141		Yes	Yes	Yes	4.17287	4.94656	5.88544	0.521354	0.464675	1.11376		Yes	Yes	Yes	3.79642	3.57102	3.30122	0.770589	0.779697	0.742329
TraesCS1A02G186100		chr1A	337300647	337301870		Yes	Yes	Yes	66.259	59.0589	50.5497	0.638352	0.437825	0.365493		-	Yes	-	87.5749	102.844	99.0513	0.717467	0.783158	0.767975
TraesCS1A02G186300		chr1A	337653975	337655149		-	Yes	-	5.42351	5.2544	4.7642	0.626387	0.537473	0.522995		Yes	-	-	0.787041	0.790883	1.5189	1.82196	1.20814	0.999734
TraesCS1A02G186400		chr1A	337655367	337656616		-	Yes	-	5.70283	5.94757	5.49662	0.775677	0.886736	0.830165		Yes	Yes	Yes	3.2855	4.44823	6.65905	1.02412	1.02345	0.918399
TraesCS1A02G186500		chr1A	337657366	337658581		-	Yes	-	11.9742	11.9966	9.86086	0.52277	0.463899	0.514456		Yes	Yes	Yes	26.6207	30.695	31.0486	0.841125	0.812032	0.742254
TraesCS1A02G186600		chr1A	337677452	337678504		-	Yes	-	1.77805	2.01751	1.78658	1.08887	1.83641	1.58807		-	Yes	-	54.0842	60.5611	52.914	0.68585	0.721156	0.669078
TraesCS1A02G186700		chr1A	337703103	337704240		Yes	Yes	Yes	18.37	19.0239	14.9406	0.478475	0.496256	0.469837		-	Yes	-	138.669	157.649	123.477	0.703187	0.691874	0.722876
TraesCS1A02G186800		chr1A	337775914	337777000		Yes	Yes	Yes	2.91542	2.60794	3.36453	1.16021	1.04315	1.49155		Yes	Yes	Yes	4.30241	4.11948	3.98095	1.06239	1.07037	0.971878
TraesCS1A02G187000		chr1A	337947843	337949587		-	Yes	-	1.25012	1.31448	1.36859	1.26437	1.37613	1.19993		-	Yes	-	10.1199	10.7774	11.2252	1.2036	1.10517	1.08475
TraesCS1A02G187100		chr1A	337981557	337987708		Yes	-	-	1.0575	1.624	1.65337	1.01633	0.97751	1.11986		-	-	-	-	-	-	-	-	-
TraesCS1A02G187300		chr1A	338214692	338217213		-	Yes	-	2.30326	2.58773	2.64287	1.01349	0.825427	0.850528		-	-	-	-	-	-	-	-	-
TraesCS1A02G187600		chr1A	338593153	338597314		-	-	-	2.1753	2.15346	2.86516	0.952231	0.914502	0.86001		-	Yes	-	5.32536	5.19857	6.20405	0.833516	1.00801	0.791781
TraesCS1A02G187700		chr1A	338600466	338600819		Yes	Yes	Yes	2.89973	3.07387	3.3029	1.96963	2.17199	1.84442		Yes	Yes	Yes	9.95024	8.77535	7.54758	0.774184	0.752225	0.865048
TraesCS1A02G188000		chr1A	339483296	339484492		Yes	Yes	Yes	8.75137	7.76176	6.21212	0.663524	0.729637	0.723888		Yes	Yes	Yes	32.9395	32.6454	30.6143	0.414671	0.400185	0.408601
TraesCS1A02G188100		chr1A	339913769	339916147		-	-	-	-	-	-	-	-	-		Yes	Yes	Yes	4.57538	4.72785	4.47858	0.624143	0.73179	0.804605
TraesCS1A02G188200		chr1A	340010733	340014644		-	-	-	14.4557	13.7989	15.0023	0.43739	0.319957	0.375404		Yes	Yes	Yes	4.80655	5.42367	6.03079	0.629543	0.716612	0.643634
TraesCS1A02G188400		chr1A	340249595	340250151		-	-	-	0.794012	0.722247	0.811742	1.37619	1.14561	0.970838		Yes	Yes	Yes	4.61055	5.30805	7.29826	0.752702	0.914798	0.608672
TraesCS1A02G188500		chr1A	340409312	340413789		Yes	-	-	10.7939	11.3114	11.0742	0.47168	0.421687	0.447451		Yes	Yes	Yes	10.4544	10.3303	12.2602	0.703327	0.648743	0.614364
TraesCS1A02G188600		chr1A	340415026	340428765		Yes	Yes	Yes	5.96133	5.17966	5.66999	0.48399	0.40758	0.459997		-	-	-	0.817447	0.987588	0.968627	1.3688	1.13573	1.09385
TraesCS1A02G188700		chr1A	341015026	341017660		-	-	-	22.3041	22.5233	23.4048	0.361041	0.411127	0.451188		Yes	-	-	54.4567	51.3718	49.4356	0.453629	0.432921	0.447105
TraesCS1A02G188800		chr1A	341867721	341871890		Yes	-	-	7.15715	6.79884	8.12589	0.465169	0.424772	0.463938		-	Yes	-	7.62841	8.01208	7.88141	0.496032	0.48669	0.404118
TraesCS1A02G188900		chr1A	341872094	341873949		-	Yes	-	5.70719	6.2304	6.12988	0.705691	0.694349	0.679837		Yes	-	-	1.54472	1.35569	2.15103	0.968811	1.01727	0.741226
TraesCS1A02G189000		chr1A	342379980	342384645		Yes	Yes	Yes	2.05817	2.28489	2.50697	0.838206	0.613065	0.647564		Yes	-	-	1.9674	2.22105	2.48627	0.75093	0.782597	0.763594
TraesCS1A02G189100		chr1A	342387315	342391668		-	-	-	16.6172	16.6705	18.0042	0.429593	0.427657	0.453312		Yes	-	-	12.5199	12.5603	12.2079	0.452334	0.442408	0.45481
TraesCS1A02G189200		chr1A	342391689	342393474		-	-	-	1.24735	1.53751	1.14066	1.06029	0.905676	1.07219		Yes	Yes	Yes	15.7748	19.3117	21.6225	0.470856	0.527131	0.439448
TraesCS1A02G189300		chr1A	342433545	342435218		Yes	-	-	1.33863	1.55418	1.30211	1.088	0.895869	0.916181		Yes	Yes	Yes	20.3966	22.6208	24.858	0.538916	0.46667	0.389618
TraesCS1A02G189400		chr1A	342595981	342598198		-	-	-	0.809633	0.956769	0.916727	0.977575	0.857328	0.867284		Yes	-	-	1.77502	1.77654	1.65824	1.10305	0.948341	0.913462
TraesCS1A02G189600		chr1A	343389704	343395042		Yes	Yes	Yes	5.11132	5.5786	6.13013	0.539583	0.459869	0.459803		Yes	-	-	5.53328	5.77443	6.69918	0.639722	0.673051	0.561057
TraesCS1A02G189700		chr1A	343395336	343397180		Yes	Yes	Yes	2.1267	2.01226	2.59257	1.05373	1.0237	1.02496		-	-	-	1.71124	1.09636	1.62528	1.20853	1.25738	1.18225
TraesCS1A02G190100		chr1A	343673959	343676434		Yes	Yes	Yes	3.65782	3.68322	3.26082	0.850193	0.676759	0.85969		-	Yes	-	40.3044	36.4909	38.1426	0.716522	0.693733	0.591309
TraesCS1A02G190200		chr1A	343680837	343685974		-	-	-	3.65277	4.06823	4.21952	0.75626	0.579851	0.61512		Yes	Yes	Yes	2.95835	3.32707	3.608	0.7954	0.811326	0.72401
TraesCS1A02G190400		chr1A	344189326	344189787		-	Yes	-	5.12655	5.9342	4.96477	1.16051	1.02952	0.862164		Yes	Yes	Yes	6.15078	6.93049	8.13755	0.876149	0.759939	0.86744
TraesCS1A02G190500		chr1A	344290258	344294613		Yes	Yes	Yes	7.0414	7.13079	7.84643	0.447676	0.509267	0.415842		-	Yes	-	13.3884	13.6597	13.79	0.40808	0.410202	0.408089
TraesCS1A02G190700		chr1A	344480199	344488546		-	Yes	-	4.78474	4.50399	5.43043	0.533611	0.536511	0.734087		-	Yes	-	7.51566	7.00697	6.92568	0.650695	0.844413	0.719691
TraesCS1A02G190800		chr1A	345108253	345116586		-	-	-	33.61	31.4871	36.2203	0.342143	0.310897	0.327872		Yes	Yes	Yes	17.8849	18.4749	18.8678	0.468896	0.448859	0.391707
TraesCS1A02G190900		chr1A	345167845	345172017		Yes	Yes	Yes	4.4389	5.02193	5.57966	0.821129	0.638851	0.561913		Yes	Yes	Yes	9.55559	10.0156	11.4449	0.503507	0.487283	0.466223
TraesCS1A02G191300		chr1A	345783582	345786960		-	-	-	14.5528	15.2189	14.4978	0.357379	0.309387	0.297944		-	Yes	-	9.5696	9.24223	7.51116	0.493684	0.486426	0.461404
TraesCS1A02G191700		chr1A	346681497	346682748		Yes	Yes	Yes	3.11167	3.16926	2.74612	0.690226	0.594578	0.641596		Yes	Yes	Yes	4.22082	4.76605	5.11998	0.723376	0.581658	0.541528
TraesCS1A02G191800		chr1A	347319840	347322090		Yes	Yes	Yes	20.5232	19.9491	18.1363	0.473445	0.438079	0.429162		Yes	Yes	Yes	4.88763	5.91237	6.27447	0.649168	0.621481	0.544722
TraesCS1A02G191900		chr1A	347322210	347325380		Yes	Yes	Yes	3.59179	3.82255	4.3123	0.714567	0.646558	0.56473		Yes	Yes	Yes	11.1886	13.1467	14.3018	0.581046	0.583611	0.546833
TraesCS1A02G192200		chr1A	347619020	347621797		-	-	-	23.3139	22.8634	23.996	0.300313	0.254795	0.292329		Yes	Yes	Yes	15.0761	15.8464	16.5978	0.502203	0.461494	0.421995
TraesCS1A02G192400		chr1A	347640297	347646899		Yes	-	-	5.05798	4.73146	5.24324	0.580075	0.427505	0.483494		Yes	Yes	Yes	5.21331	5.05813	5.90712	0.721112	0.576293	0.777216
TraesCS1A02G192500		chr1A	347918471	347920800		-	-	-	6.33329	5.765	6.15847	0.495603	0.448642	0.486266		Yes	Yes	Yes	5.17268	4.95232	5.93528	0.653483	0.632211	0.668272
TraesCS1A02G192600		chr1A	347922420	347923294		Yes	Yes	Yes	2.44584	2.51637	2.16914	0.792841	0.741703	0.826649		-	-	-	0.312552	-	-	2.22508	-	-
TraesCS1A02G192800		chr1A	348398566	348400900		Yes	-	-	34.406	31.3628	30.4557	0.582119	0.535435	0.595459		Yes	Yes	Yes	19.8468	19.9445	21.6018	0.494524	0.457607	0.445928
TraesCS1A02G193000		chr1A	348717273	348721726		-	-	-	20.3336	19.2826	21.3769	0.387539	0.297473	0.314547		Yes	Yes	Yes	20.1336	18.3119	16.4803	0.447702	0.499076	0.44027
TraesCS1A02G193200		chr1A	349358465	349360851		Yes	Yes	Yes	3.18063	2.70062	2.34294	1.11738	0.90645	1.05858		-	Yes	-	3.20711	3.81538	4.11163	0.799949	0.795889	1.00774
TraesCS1A02G193300		chr1A	349997363	350018551		-	-	-	5.06586	4.78266	5.88106	0.564312	0.490359	0.619911		-	Yes	-	6.89296	5.80222	6.57144	0.659257	0.784298	0.694505
TraesCS1A02G193400		chr1A	350395521	350401398		-	Yes	-	10.7557	10.7605	10.2347	0.652863	0.579972	0.652848		-	Yes	-	1.76205	1.62379	2.33285	1.04247	1.17838	1.00242
TraesCS1A02G193500		chr1A	350749390	350752293		-	-	-	91.9033	91.4103	92.9307	0.279685	0.244341	0.28881		Yes	Yes	Yes	4.0756	3.83182	4.54887	0.625911	0.620603	0.683588
TraesCS1A02G193600		chr1A	350752534	350763077		Yes	-	-	3.07751	3.49757	4.46566	0.549295	0.486707	0.67365		-	Yes	-	4.19415	3.72435	4.16303	0.771179	0.813383	0.647175
TraesCS1A02G193900		chr1A	351343639	351345047		-	-	-	6.03432	5.85495	6.0978	0.359267	0.378901	0.3921		Yes	Yes	Yes	5.38046	5.63108	5.93873	0.670593	0.671163	0.678662
TraesCS1A02G194000		chr1A	351344987	351347996		-	-	-	82.4299	88.8982	85.7254	0.308378	0.253863	0.245495		-	Yes	-	94.609	102.294	94.9505	0.481013	0.49993	0.524922
TraesCS1A02G194100		chr1A	351349023	351350790		Yes	-	-	6.84673	6.86481	7.20576	0.419766	0.364256	0.398661		Yes	Yes	Yes	7.40469	6.80978	6.49895	0.571201	0.543974	0.600569
TraesCS1A02G194200		chr1A	351474705	351476085		Yes	Yes	Yes	4.47177	5.75245	7.03176	1.24681	1.12853	0.92216		Yes	Yes	Yes	58.3482	60.3568	55.9995	0.430001	0.431842	0.437
TraesCS1A02G194600		chr1A	351856915	351859473		Yes	-	-	4.5892	3.85373	4.30437	0.567165	0.566126	0.522489		Yes	Yes	Yes	14.8515	13.7804	13.7344	0.501295	0.675031	0.493297
TraesCS1A02G194800		chr1A	351878373	351882317		-	-	-	9.4642	8.88254	10.0764	0.451214	0.40727	0.434541		-	Yes	-	12.2703	11.232	12.1802	0.429057	0.458112	0.383339
TraesCS1A02G194900		chr1A	351882936	351886581		-	-	-	42.6713	43.0128	44.4309	0.343791	0.353594	0.332097		Yes	Yes	Yes	15.8828	17.8743	25.602	0.76573	0.670002	0.601818
TraesCS1A02G195000		chr1A	352013037	352016495		-	Yes	-	10.9914	10.0776	11.7264	0.470989	0.449485	0.537946		-	Yes	-	6.06698	5.67451	6.28167	0.913991	0.952115	0.799342
TraesCS1A02G195200		chr1A	352173116	352180076		-	-	-	13.6297	14.0989	13.9426	0.368943	0.310395	0.333006		-	Yes	-	1.91309	1.887	2.01178	1.06287	0.892114	0.852713
TraesCS1A02G195300	TaPYL1‐A1	chr1A	352852084	352862015		-	-	-	7.77974	8.39529	8.61184	0.449556	0.356464	0.394871		Yes	Yes	Yes	6.29828	6.47327	7.69433	0.605781	0.660328	0.547589
TraesCS1A02G195400		chr1A	353251752	353256652		-	-	-	64.5346	64.2573	68.6948	0.332466	0.3138	0.340712		-	Yes	-	122.442	114.884	124.767	0.393881	0.419394	0.364358
TraesCS1A02G195500		chr1A	353256784	353259995		-	-	-	17.9658	19.2515	16.5852	0.424754	0.364641	0.451918		Yes	Yes	Yes	1.41017	1.35418	1.31552	1.43093	1.58678	1.27283
TraesCS1A02G195700		chr1A	353625764	353631621		Yes	-	-	20.1618	18.1634	18.83	0.525049	0.510185	0.529563		Yes	Yes	Yes	20.0892	20.8329	22.0433	0.678911	0.68658	0.741967
TraesCS1A02G195900		chr1A	353913629	353917286		-	Yes	-	13.0494	12.7397	13.5311	0.491853	0.526315	0.557299		-	Yes	-	28.0531	27.9563	27.6809	0.627773	0.672107	0.530446
TraesCS1A02G196000		chr1A	354189074	354191293		Yes	Yes	Yes	2.03862	2.49367	2.42819	0.990291	0.87438	0.860345		Yes	Yes	Yes	2.20413	3.07876	3.79979	0.836064	0.802586	0.643527
TraesCS1A02G196200		chr1A	354299640	354302644		-	-	-	-	-	-	-	-	-		-	Yes	-	2.12422	2.42771	2.29105	0.838137	1.0378	0.809598
TraesCS1A02G196500		chr1A	354934937	354937526		Yes	Yes	Yes	22.9371	19.7826	19.3164	0.493246	0.481133	0.470139		-	-	-	-	-	-	-	-	-
TraesCS1A02G196800		chr1A	354950050	354955890		-	-	-	2.96315	2.91869	3.3007	0.557896	0.710229	0.606114		-	Yes	-	5.65306	5.41979	5.42402	0.669945	0.673666	0.659771
TraesCS1A02G197100		chr1A	355326375	355329223		-	-	-	1.20452	1.0137	1.02502	1.00488	0.809466	0.913204		-	Yes	-	1.66975	1.4002	1.57419	0.954945	1.07569	0.994184
TraesCS1A02G197200		chr1A	355324903	355334094		Yes	-	-	19.6694	18.1961	18.7082	0.454288	0.351374	0.384562		Yes	-	-	17.707	17.6424	13.9589	0.450669	0.43808	0.388947
TraesCS1A02G197300		chr1A	355335880	355338713		-	-	-	37.7173	39.308	40.2769	0.258003	0.21982	0.246287		Yes	Yes	Yes	35.6077	38.3984	40.9406	0.346013	0.324017	0.271549
TraesCS1A02G197500		chr1A	355345020	355348510		Yes	-	-	13.155	15.4839	15.0826	0.435524	0.359144	0.410249		-	-	-	14.297	14.3727	15.3618	0.412306	0.356252	0.331159
TraesCS1A02G197600		chr1A	355624056	355628073		-	-	-	53.1311	53.1921	48.1616	0.268836	0.264611	0.260375		Yes	Yes	Yes	28.3217	26.0927	23.4751	0.303989	0.348493	0.305251
TraesCS1A02G197700		chr1A	355629145	355631608		Yes	-	-	1.23483	1.4171	1.20396	0.898362	0.756144	0.842584		-	-	-	0.725831	0.579448	0.512981	1.65026	1.3822	1.24971
TraesCS1A02G197800		chr1A	355714313	355716842		-	-	-	10.6135	10.5591	11.2989	0.378364	0.367928	0.355105		Yes	-	-	14.3514	14.263	15.3693	0.404773	0.385844	0.439548
TraesCS1A02G198000		chr1A	355720785	355722734		-	-	-	6.96008	7.58854	8.73292	0.362095	0.353807	0.34264		-	Yes	-	8.74858	7.78234	9.41862	0.600821	0.470305	0.461542
TraesCS1A02G198100		chr1A	355730243	355735445		-	-	-	12.4837	13.1819	13.9653	0.349501	0.291176	0.296796		-	Yes	-	14.3257	12.6783	14.0343	0.623502	0.537151	0.446578
TraesCS1A02G198200		chr1A	356389927	356392775		Yes	Yes	Yes	6.01327	5.90306	6.1672	0.538054	0.495463	0.538056		Yes	Yes	Yes	5.49037	5.32879	6.64551	0.794814	0.668998	0.532197
TraesCS1A02G198300		chr1A	356427950	356430605		-	Yes	-	2.00672	1.76503	1.80989	0.721974	0.66288	0.776138		Yes	Yes	Yes	5.72055	5.28363	4.38338	0.753551	0.777829	0.703861
TraesCS1A02G198400		chr1A	356471270	356474267		-	-	-	60.4212	62.2212	58.3302	0.266256	0.235982	0.260241		-	Yes	-	8.93365	9.29572	9.11771	0.417359	0.4395	0.410493
TraesCS1A02G198700		chr1A	357062029	357077269		-	-	-	2.62973	2.78785	2.65851	0.654519	0.552651	0.608237		Yes	Yes	Yes	1.92173	1.89808	2.29703	0.890325	0.94756	0.825375
TraesCS1A02G198800		chr1A	357121054	357123995		-	-	-	1.52503	1.69544	1.60684	0.977765	0.799093	0.73773		Yes	Yes	Yes	2.39307	2.51345	1.56547	1.05038	0.942496	1.00996
TraesCS1A02G198900		chr1A	357414942	357418373		-	Yes	-	1.34161	1.75594	1.50058	0.949827	0.854869	0.862078		Yes	Yes	Yes	0.571461	0.783198	0.985019	1.48433	1.54457	1.16466
TraesCS1A02G199000		chr1A	357763072	357781554		Yes	-	-	3.9591	4.01136	4.70424	0.565934	0.63285	0.528512		Yes	Yes	Yes	3.85938	3.64887	3.86183	0.704941	0.634335	0.552985
TraesCS1A02G199300		chr1A	358151459	358152398		-	-	-	-	-	-	-	-	-		Yes	-	-	0.897502	0.728935	0.663843	1.83322	1.49407	1.45419
TraesCS1A02G199400		chr1A	358174992	358175870		-	-	-	-	-	-	-	-	-		-	Yes	-	0.917905	1.41195	1.01581	1.57796	1.23692	1.49683
TraesCS1A02G200000		chr1A	359689254	359690781		-	Yes	-	133.563	127.878	119.474	0.344526	0.303551	0.35757		Yes	Yes	Yes	0.520935	0.615364	0.867176	2.70292	2.04139	2.41719
TraesCS1A02G200200		chr1A	360009367	360011036		-	-	-	1.36298	1.4525	1.34625	1.04032	0.952459	0.946251		Yes	Yes	Yes	1.31452	1.75272	1.7787	1.21134	0.993544	0.962907
TraesCS1A02G200400		chr1A	360455273	360459181		Yes	Yes	Yes	2.0891	2.83926	3.20407	2.19567	1.71404	1.80734		-	-	-	-	-	-	-	-	-
TraesCS1A02G200800		chr1A	361352160	361359053		-	-	-	15.4041	14.3494	15.1136	0.454737	0.30034	0.361344		Yes	Yes	Yes	24.6486	22.7641	22.0527	0.460268	0.389511	0.382023
TraesCS1A02G200900		chr1A	361509862	361517115		Yes	-	-	3.43065	3.30249	3.79366	0.646461	0.47469	0.620648		Yes	Yes	Yes	4.77429	4.50369	5.26359	0.730353	0.795903	0.812368
TraesCS1A02G201200		chr1A	362193527	362195887		Yes	-	-	2.0093	1.87409	2.16852	0.905473	0.74686	0.734067		-	Yes	-	3.7823	3.57086	4.18493	0.729503	0.937657	0.763797
TraesCS1A02G201300		chr1A	362209635	362210289		-	Yes	-	31.1289	30.7133	28.805	0.736602	0.470108	0.531916		-	Yes	-	51.5456	56.6736	47.6349	0.459618	0.487631	0.480516
TraesCS1A02G201400		chr1A	362403114	362405555		-	Yes	-	3.84139	3.86858	3.64801	0.953065	0.887123	0.86078		-	Yes	-	4.89238	4.91434	3.55522	0.948276	0.875972	0.923017
TraesCS1A02G201500		chr1A	362620173	362622906		-	-	-	1.47371	1.4892	1.3907	0.708622	0.844509	0.833321		-	Yes	-	1.93428	1.7928	1.85738	0.875532	0.92378	0.841265
TraesCS1A02G201600		chr1A	362861943	362866378		-	-	-	42.4562	46.8203	50.6819	0.289455	0.25924	0.306059		Yes	Yes	Yes	18.434	19.6241	20.2053	0.387217	0.331378	0.370692
TraesCS1A02G201700		chr1A	363006018	363007340		Yes	-	-	9.77103	10.0673	10.0746	0.434961	0.525523	0.462261		Yes	Yes	Yes	8.3173	8.2935	7.16655	0.570051	0.580333	0.533919
TraesCS1A02G202300		chr1A	363451669	363455323		-	-	-	60.9594	56.163	58.6892	0.523086	0.505628	0.53084		-	Yes	-	49.1627	47.9661	53.4206	0.509442	0.619892	0.549587
TraesCS1A02G202700		chr1A	363690449	363695876		Yes	-	-	1.11351	1.26516	1.12762	1.34844	1.07566	1.15258		-	-	-	0.521578	0.606644	0.721425	1.87091	1.99107	1.74662
TraesCS1A02G203200		chr1A	364655697	364656832		Yes	Yes	Yes	2.58785	2.88994	3.06331	1.15378	1.23681	1.36459		Yes	Yes	Yes	8.49505	6.91212	5.43643	0.91611	0.718559	0.856186
TraesCS1A02G203400		chr1A	365064927	365071233		-	-	-	17.2935	16.5562	16.3181	0.296777	0.309651	0.286273		Yes	-	-	19.809	19.2183	18.8817	0.38108	0.416905	0.331175
TraesCS1A02G203600		chr1A	365492204	365493755		-	Yes	-	43.9804	39.0332	50.7962	0.805476	0.831988	0.939938		Yes	Yes	Yes	56.8534	54.176	48.2373	0.588925	0.547862	0.538444
TraesCS1A02G203700		chr1A	365507410	365508980		-	Yes	-	51.8494	45.8792	54.6623	0.947805	1.51344	1.04355		-	Yes	-	9.6009	10.1541	5.80371	0.991494	1.10194	1.32429
TraesCS1A02G203900		chr1A	365617809	365619048		-	Yes	-	2.60207	2.7205	2.27692	0.827732	0.70868	0.760551		Yes	Yes	Yes	5.37252	5.73092	4.55652	0.689259	0.680774	0.720428
TraesCS1A02G204200		chr1A	366265077	366268189		-	-	-	16.8868	15.9233	15.7295	0.540408	0.488673	0.416095		Yes	Yes	Yes	11.59	11.6557	9.0732	0.398177	0.479586	0.381092
TraesCS1A02G204300		chr1A	366268844	366273867		Yes	Yes	Yes	4.672	5.18062	5.72641	0.624429	0.44493	0.506755		Yes	Yes	Yes	2.07875	1.65415	2.11144	1.45154	1.00544	0.945713
TraesCS1A02G204700		chr1A	366543063	366544672		-	Yes	-	6.36266	7.09305	6.4893	0.656558	0.617453	0.618213		Yes	Yes	Yes	4.04085	5.30196	6.27726	0.704933	0.669849	0.625708
TraesCS1A02G205000		chr1A	367010702	367011813		-	-	-	1.22627	1.31351	1.31824	0.869257	0.822506	1.80647		-	Yes	-	2.46369	2.20112	2.07419	0.920197	0.814172	0.690493
TraesCS1A02G205100		chr1A	367381194	367383318		-	-	-	0.953403	0.717055	0.942997	1.38793	1.20861	1.36177		Yes	Yes	Yes	10.0255	9.38226	10.0343	0.762437	0.807875	0.707449
TraesCS1A02G205600		chr1A	368196476	368198581		-	Yes	-	11.8055	11.4662	11.902	0.364505	0.306867	0.331485		Yes	-	-	2.10694	2.19496	2.49207	0.908065	0.987466	0.780985
TraesCS1A02G205700		chr1A	368358196	368360794		-	-	-	15.8591	16.2681	17.8927	0.318331	0.328441	0.302873		-	Yes	-	12.4062	14.0503	12.6076	0.413907	0.407999	0.398425
TraesCS1A02G206000		chr1A	368366471	368375959		-	-	-	0.773636	0.828095	0.89925	1.10367	0.912498	0.95616		Yes	-	-	1.37304	1.41182	1.45508	1.39527	0.90127	1.1103
TraesCS1A02G206100		chr1A	368711528	368714085		Yes	-	-	3.22596	3.10992	2.9922	0.776998	0.774393	0.722431		-	-	-	3.5643	3.65156	4.19772	0.896456	1.11859	0.840326
TraesCS1A02G206200		chr1A	368745828	368747034		Yes	Yes	Yes	3.33461	3.27309	3.16839	0.73055	0.564642	0.860072		Yes	Yes	Yes	6.9536	7.84075	7.90346	0.66839	0.667497	0.485865
TraesCS1A02G206300		chr1A	368797510	368799818		Yes	Yes	Yes	2.93692	2.74594	3.22356	0.88419	0.872392	0.939753		-	Yes	-	5.92214	5.88023	6.19373	0.791078	0.744897	0.663724
TraesCS1A02G206400		chr1A	368799977	368802673		-	-	-	0.88606	0.769096	0.937406	1.14958	0.924217	1.23979		Yes	-	-	1.09195	0.983378	0.969937	1.39166	1.18247	1.21767
TraesCS1A02G206500		chr1A	368802965	368803839		-	-	-	0.563723	0.469243	-	1.52839	1.55531	-		-	Yes	-	2.38229	2.86464	2.39379	1.07477	1.00208	0.982213
TraesCS1A02G206600		chr1A	368807837	368816199		Yes	Yes	Yes	4.54727	4.64317	5.62163	0.613597	0.457477	0.593031		Yes	Yes	Yes	1.53208	1.72192	1.68224	1.06553	1.17277	1.0602
TraesCS1A02G206700		chr1A	368819739	368830138		-	-	-	13.4692	12.7568	13.7411	0.386252	0.357328	0.389508		-	Yes	-	10.1639	9.60468	11.887	0.594367	0.609535	0.580401
TraesCS1A02G206800		chr1A	368831473	368832558		Yes	-	-	20.7817	20.1083	19.4172	0.615272	0.563059	0.570533		Yes	Yes	Yes	40.8364	37.9897	30.7845	0.365624	0.311878	0.284001
TraesCS1A02G206900		chr1A	369048987	369054383		-	-	-	38.539	38.6641	39.322	0.23842	0.222644	0.274376		-	Yes	-	2.61786	2.71859	2.8845	0.913513	0.887531	0.722193
TraesCS1A02G207600		chr1A	369496596	369497847		Yes	-	-	0.790774	1.11066	1.97062	1.71393	1.54799	1.68116		-	-	-	-	-	-	-	-	-
TraesCS1A02G207700		chr1A	369502937	369513884		Yes	-	-	2.63881	2.69366	2.83802	0.670565	0.655085	0.72349		Yes	-	-	1.59516	1.6295	2.24723	0.847909	0.998118	0.856293
TraesCS1A02G207900		chr1A	369579377	369581592		-	Yes	-	3.10801	3.38799	3.32363	0.742934	0.644679	0.787413		Yes	Yes	Yes	5.75626	6.13545	4.79004	0.692937	0.778477	0.793151
TraesCS1A02G208000		chr1A	369694640	369698406		-	-	-	1.97203	2.08941	2.22741	0.758277	0.668571	0.59284		Yes	Yes	Yes	5.92089	5.39616	5.11344	0.583817	0.55603	0.501471
TraesCS1A02G208400		chr1A	370021551	370025217		-	-	-	11.4532	11.5148	11.0651	0.37635	0.381461	0.373402		Yes	-	-	1.95674	1.66066	1.64971	0.852353	1.2319	0.804633
TraesCS1A02G208500		chr1A	370092549	370097701		-	-	-	15.8396	15.576	17.0863	0.366659	0.2953	0.297825		-	Yes	-	5.60092	5.30272	5.72622	0.752433	0.762731	0.613105
TraesCS1A02G208600		chr1A	370102576	370108219		-	-	-	17.0988	17.2954	18.777	0.375792	0.345238	0.247584		Yes	Yes	Yes	34.6306	30.8685	31.2343	0.44984	0.392662	0.390285
TraesCS1A02G208700		chr1A	370108509	370111042		-	-	-	-	-	-	-	-	-		Yes	Yes	Yes	1.67355	1.91862	2.27892	0.925801	0.942744	0.823316
TraesCS1A02G208900		chr1A	371079272	371082258		-	Yes	-	2.97546	2.5429	3.02264	0.83096	0.685262	0.757587		-	-	-	0.495137	0.313027	0.426796	3.96312	2.08693	1.59651
TraesCS1A02G209100		chr1A	371219824	371221463		Yes	Yes	Yes	15.9679	12.7962	10.8688	1.0411	0.896411	1.01575		Yes	Yes	Yes	11.0501	9.45631	6.67544	0.862036	0.920032	0.827681
TraesCS1A02G209400		chr1A	372067594	372070231		-	Yes	-	5.75314	6.79328	5.93138	0.485722	0.592039	0.502211		Yes	Yes	Yes	13.3242	16.0442	18.403	0.51712	0.530444	0.503376
TraesCS1A02G209600		chr1A	372236293	372240822		-	-	-	51.9216	53.4844	54.8697	0.256339	0.229947	0.27171		-	Yes	-	51.3566	56.4234	52.5217	0.338889	0.334766	0.306609
TraesCS1A02G209800		chr1A	372287159	372287593		-	-	-	0.360268	-	-	1.92742	-	-		Yes	Yes	Yes	55.0552	63.6093	63.36	0.713674	0.697237	0.650407
TraesCS1A02G209900		chr1A	372315641	372316077		-	-	-	-	-	-	-	-	-		-	Yes	-	1.20337	1.35849	1.21537	1.36179	1.28025	1.55064
TraesCS1A02G210000		chr1A	372467568	372467930		-	-	-	1.69746	1.74405	0.836966	1.23796	1.16958	1.20934		Yes	Yes	Yes	7.39546	9.83338	10.9448	1.24325	1.30591	1.08342
TraesCS1A02G210100		chr1A	372525023	372530677		-	-	-	-	-	-	-	-	-		Yes	-	-	-	0.762484	0.942661	-	2.34832	1.946
TraesCS1A02G210300		chr1A	372624794	372637165		Yes	-	-	9.19805	9.81251	10.6899	0.490481	0.402656	0.391702		-	-	-	8.48132	8.88986	8.91177	0.454433	0.413561	0.393261
TraesCS1A02G210500		chr1A	372909547	372911213		Yes	-	-	2.19182	2.55497	2.37969	0.820095	0.633464	0.636664		-	-	-	0.603991	0.518669	0.545886	2.07104	1.5275	1.64436
TraesCS1A02G210600		chr1A	372942515	372944762		Yes	Yes	Yes	12.06	10.0484	10.9718	0.524412	0.386212	0.441045		Yes	Yes	Yes	8.37514	7.75061	7.66978	0.510885	0.660492	0.572732
TraesCS1A02G210800		chr1A	373313408	373320576		-	Yes	-	7.50851	8.33472	8.81283	0.685169	0.689037	0.687864		-	Yes	-	4.75532	4.97993	4.94433	0.784902	0.696415	0.81941
TraesCS1A02G211000		chr1A	373770846	373774884		Yes	Yes	Yes	7.42765	6.36853	5.22477	0.811119	0.778438	0.813653		-	Yes	-	11.6327	12.0739	10.8	1.18186	0.832244	0.820975
TraesCS1A02G211300		chr1A	374167247	374169463		-	Yes	-	3.96954	4.09492	4.31842	0.680177	0.591737	0.652453		-	Yes	-	6.40282	7.01276	6.30176	0.837763	0.699407	0.543515
TraesCS1A02G211500		chr1A	374214039	374217445		Yes	Yes	Yes	18.4039	15.7242	13.5862	0.745184	0.71747	0.685071		-	Yes	-	34.1762	33.6879	30.3623	0.530583	0.530093	0.519857
TraesCS1A02G211600		chr1A	374217713	374219255		-	-	-	5.79062	5.99487	6.6067	0.419439	0.359285	0.379171		Yes	-	-	1.17482	1.28153	1.13853	1.33873	1.23418	1.00508
TraesCS1A02G211900		chr1A	374566586	374570315		Yes	-	-	2.84684	2.76806	3.01049	0.769368	0.614172	0.613988		-	Yes	-	3.21579	2.92323	3.63388	0.812701	0.960018	0.674635
TraesCS1A02G212000		chr1A	374689236	374690910		-	Yes	-	20.6523	23.4413	20.3451	0.525857	0.473919	0.616585		Yes	Yes	Yes	67.7157	83.7055	87.2515	0.471213	0.458178	0.43597
TraesCS1A02G212200		chr1A	374958311	374959901		-	-	-	-	-	0.393733	-	-	2.77192		Yes	Yes	Yes	73.2932	86.7542	93.0641	0.427238	0.419771	0.367536
TraesCS1A02G212300		chr1A	375014696	375016345		-	Yes	-	13.8401	15.0624	10.815	0.740095	0.622825	0.720278		Yes	Yes	Yes	50.4979	63.692	71.4163	0.441183	0.418433	0.380434
TraesCS1A02G212400		chr1A	375112041	375113726		-	Yes	-	18.8332	22.5735	23.626	0.708968	0.50209	0.645856		Yes	Yes	Yes	34.0226	42.6567	45.6673	0.55495	0.584137	0.562
TraesCS1A02G212600		chr1A	375467613	375469315		Yes	Yes	Yes	2.15145	2.26134	1.76792	1.0153	1.05584	0.954687		Yes	-	-	0.521531	0.83119	0.989213	1.47637	1.28557	1.04508
TraesCS1A02G212700		chr1A	375471252	375477408		-	Yes	-	2.61305	2.74213	2.45525	1.15931	0.909589	1.26355		-	-	-	-	-	-	-	-	-
TraesCS1A02G212800		chr1A	376135407	376155653		-	-	-	24.6119	24.0769	28.0883	0.311735	0.288079	0.360353		-	Yes	-	25.8319	24.4	26.2699	0.553362	0.591462	0.593545
TraesCS1A02G212900		chr1A	376476402	376480121		Yes	Yes	Yes	5.38424	4.78039	4.46095	0.763953	0.507153	0.489518		Yes	-	-	1.48569	1.4618	1.69755	0.902109	1.12402	1.02584
TraesCS1A02G213000		chr1A	376501862	376506945		-	-	-	24.2577	25.5369	22.2905	0.42709	0.361705	0.341884		Yes	Yes	Yes	9.30014	9.56265	9.37692	0.443971	0.47014	0.46278
TraesCS1A02G213300		chr1A	376513008	376515549		-	Yes	-	3.00244	3.07598	3.12156	0.585243	0.517434	0.792513		-	Yes	-	3.3243	3.25912	3.43709	0.851668	0.984358	0.71401
TraesCS1A02G213400		chr1A	376670249	376674535		Yes	-	-	23.1633	21.2769	21.8607	0.376258	0.33637	0.388611		-	-	-	28.722	26.9622	29.5074	0.409822	0.484398	0.398381
TraesCS1A02G213600		chr1A	376784997	376786845		-	-	-	22.3411	23.153	22.6296	0.404644	0.353833	0.375587		Yes	Yes	Yes	3.98889	4.65872	5.16203	0.677543	0.61453	0.59073
TraesCS1A02G213900		chr1A	377023380	377028566		-	-	-	5.25899	4.28139	4.62933	0.594569	0.412125	0.508391		Yes	Yes	Yes	7.9636	7.39985	6.89753	0.634663	0.630534	0.519285
TraesCS1A02G214300		chr1A	377426421	377429880		-	Yes	-	7.80315	7.41677	7.75565	0.547569	0.459035	0.37261		Yes	-	-	4.02126	4.17179	4.5353	0.69181	0.641129	0.726809
TraesCS1A02G214500		chr1A	377449328	377451777		-	-	-	-	-	-	-	-	-		Yes	-	-	0.785448	0.974503	2.16645	1.19062	1.38903	0.950496
TraesCS1A02G215400		chr1A	380939668	380973697		-	-	-	25.1785	23.6938	25.863	0.44631	0.36137	0.285437		-	Yes	-	18.1272	15.6877	17.6893	0.569751	0.63003	0.603471
TraesCS1A02G215500		chr1A	381096100	381098610		Yes	-	-	16.267	15.9418	15.4292	0.574578	0.527649	0.540293		Yes	Yes	Yes	35.1333	28.2164	18.3173	0.671143	0.724214	0.825154
TraesCS1A02G215600		chr1A	381274139	381277555		-	-	-	16.7635	15.9066	16.1672	0.330092	0.334309	0.313526		Yes	-	-	28.0134	25.6154	25.9529	0.427261	0.452871	0.376954
TraesCS1A02G215900		chr1A	381819326	381822599		Yes	Yes	Yes	3.32612	3.00836	3.84244	1.46658	1.28612	1.4294		Yes	Yes	Yes	6.14782	4.52168	4.18215	0.732229	0.527577	0.680005
TraesCS1A02G216300		chr1A	382252188	382253147		-	-	-	2.60843	2.62008	2.70075	0.885659	0.793545	0.786626		Yes	Yes	Yes	4.77282	5.10423	4.88311	0.728282	0.705801	0.672901
TraesCS1A02G216800		chr1A	384324130	384326787		Yes	-	-	4.66777	4.74164	5.65705	0.538626	0.47613	0.490027		-	Yes	-	7.44914	8.21455	8.08788	0.510721	0.522872	0.449123
TraesCS1A02G217000		chr1A	384774595	384776285		-	-	-	1.27377	1.31282	1.05373	0.922014	0.761453	1.03084		-	Yes	-	3.0287	3.06485	3.41783	0.831937	0.88746	0.774659
TraesCS1A02G217100		chr1A	385271361	385272314		Yes	Yes	Yes	5.25449	4.8208	4.18058	0.643815	0.598455	0.694144		-	Yes	-	5.09795	6.36846	6.26488	0.828012	0.805222	0.760739
TraesCS1A02G217200		chr1A	385274610	385277432		Yes	Yes	Yes	181.516	200.095	191.913	0.461469	0.357907	0.402322		-	Yes	-	250.247	283.984	272.457	0.64147	0.667057	0.608354
TraesCS1A02G217300		chr1A	385350140	385353160		-	-	-	26.1284	26.6522	24.5538	0.245452	0.220443	0.295176		-	Yes	-	11.6947	11.2461	10.7788	0.44585	0.38985	0.388153
TraesCS1A02G217400		chr1A	385354480	385359921		-	Yes	-	2.01115	2.3318	2.57981	1.10003	0.805563	0.917766		Yes	Yes	Yes	3.10219	3.88176	4.20271	0.761842	0.872737	0.598011
TraesCS1A02G217500		chr1A	385650060	385653052		Yes	-	-	1.76479	1.78477	1.83216	0.857324	0.782555	0.796837		Yes	-	-	1.31415	1.3506	1.49177	1.03687	1.3871	0.884806
TraesCS1A02G218000		chr1A	386425625	386435664		-	-	-	11.6387	12.2798	13.3367	0.375437	0.336588	0.354383		Yes	Yes	Yes	4.62248	3.94072	4.06354	0.691298	0.725882	0.631164
TraesCS1A02G218100		chr1A	386479232	386480418		Yes	Yes	Yes	3.42948	3.47348	3.30568	1.04126	1.01851	1.1269		-	-	-	0.324984	0.37922	0.464716	1.66893	2.32019	1.87516
TraesCS1A02G218200		chr1A	386719858	386724132		-	-	-	2.97582	3.57829	3.41362	0.668325	0.450001	0.56324		Yes	Yes	Yes	4.31172	4.5021	5.41479	0.733413	0.787008	0.66093
TraesCS1A02G218300		chr1A	386869893	386871162		-	-	-	-	-	-	-	-	-		-	Yes	-	1.41385	1.51438	1.24439	1.19762	1.16005	1.23003
TraesCS1A02G218400		chr1A	387022762	387028345		-	Yes	-	2.73659	2.57377	2.60662	0.936441	0.802898	1.21503		Yes	Yes	Yes	4.84105	4.86698	5.94275	0.921633	1.06221	0.967947
TraesCS1A02G218500		chr1A	387028441	387031046		Yes	-	-	2.23592	2.32466	2.55995	0.742887	0.796049	0.814811		-	-	-	1.21761	0.997794	1.18016	1.2837	1.24434	1.1109
TraesCS1A02G218600		chr1A	387197992	387199892		Yes	Yes	Yes	2.15334	1.5113	1.12873	2.40976	1.16848	1.2727		-	-	-	0.690224	0.475207	0.33965	1.9088	1.72381	1.68754
TraesCS1A02G218900		chr1A	387520024	387524441		-	-	-	39.0792	37.6281	39.1304	0.326094	0.344608	0.298559		Yes	-	-	52.8991	46.9939	39.3083	0.362708	0.377553	0.30425
TraesCS1A02G219000		chr1A	387811367	387813490		-	Yes	-	2.25609	2.35998	2.57386	0.729932	0.621086	0.645566		-	Yes	-	5.94015	5.91467	5.727	0.785239	0.697955	0.649009
TraesCS1A02G219200		chr1A	387840338	387841862		Yes	-	-	15.3954	18.0305	19.5242	0.617539	0.582564	0.593218		Yes	Yes	Yes	55.9831	51.2391	45.8853	0.497285	0.493158	0.429607
TraesCS1A02G219500		chr1A	388160270	388163237		-	-	-	-	-	-	-	-	-		Yes	-	-	3.16789	2.69129	3.51639	0.822661	0.779159	0.582996
TraesCS1A02G219800		chr1A	388833592	388837249		Yes	Yes	Yes	4.00591	4.31547	5.1762	0.742741	0.568952	0.62853		Yes	Yes	Yes	5.76165	5.27347	5.05842	0.503529	0.580797	0.553682
TraesCS1A02G220100		chr1A	388941479	388944988		Yes	-	-	4.57983	4.62398	4.63242	0.90735	0.841269	0.855299		Yes	-	-	1.97332	1.48702	1.8866	1.4742	1.23504	1.16872
TraesCS1A02G220700		chr1A	389819545	389821975		-	-	-	-	-	-	-	-	-		Yes	-	-	1.13204	1.35864	1.33439	1.21386	1.03597	1.02319
TraesCS1A02G221000		chr1A	389869226	389875163		-	Yes	-	6.62665	8.42243	8.34781	0.883566	0.821556	0.986531		Yes	-	-	1.06282	1.02771	0.975292	2.10384	1.26033	1.64016
TraesCS1A02G221100		chr1A	390085667	390097150		-	-	-	24.1727	24.3965	26.754	0.302556	0.246764	0.244153		-	Yes	-	13.3638	13.9256	15.0228	0.558	0.647713	0.581788
TraesCS1A02G221200		chr1A	390097717	390099586		-	-	-	1.31186	1.50263	1.16711	1.08781	0.73456	0.837209		-	Yes	-	1.54615	1.79649	1.81554	1.00542	0.786791	0.839329
TraesCS1A02G221500		chr1A	390640334	390642901		Yes	Yes	Yes	3.07376	2.8062	3.44896	0.573747	0.647397	0.78051		-	-	-	3.1914	3.23009	3.49384	0.65694	0.619346	0.516714
TraesCS1A02G221600		chr1A	390708277	390710135		Yes	Yes	Yes	2.53428	2.92995	3.163	0.800556	0.656331	0.647443		Yes	-	-	0.937632	0.930525	1.30027	1.16417	1.25468	1.03147
TraesCS1A02G221700		chr1A	391235429	391237088		-	-	-	16.3695	17.0033	18.7203	0.592797	0.580259	0.539891		-	Yes	-	12.0996	11.9219	9.97138	1.03325	0.923419	1.02079
TraesCS1A02G221800		chr1A	391249413	391255585		-	-	-	9.3492	9.36434	9.86066	0.376961	0.359226	0.440888		Yes	Yes	Yes	15.6062	15.0199	14.4162	0.492115	0.581263	0.496405
TraesCS1A02G222000		chr1A	391669902	391674913		-	-	-	29.3937	28.797	32.4992	0.283638	0.230046	0.259391		Yes	-	-	44.4798	44.1283	40.2309	0.286716	0.279796	0.288677
TraesCS1A02G222200		chr1A	391846315	391851191		Yes	-	-	4.81833	5.07702	5.37155	0.538016	0.389365	0.57063		-	Yes	-	8.4357	7.73977	7.99023	0.545088	0.667965	0.551637
TraesCS1A02G222500		chr1A	392084288	392085142		-	-	-	-	-	0.293557	-	-	2.00002		Yes	Yes	Yes	3.22295	4.15447	4.44536	0.926846	0.699309	0.581798
TraesCS1A02G222900		chr1A	392744232	392747376		Yes	-	-	10.081	10.611	11.2677	0.44822	0.439036	0.422073		Yes	Yes	Yes	5.6914	5.27536	5.00566	0.49318	0.52602	0.486042
TraesCS1A02G223000		chr1A	392777543	392781440		Yes	-	-	4.40847	4.79971	4.85625	0.528644	0.373752	0.448273		-	Yes	-	3.84314	3.09476	3.36583	0.856741	0.630969	0.501496
TraesCS1A02G223200		chr1A	393456324	393459251		Yes	Yes	Yes	9.23607	8.81492	10.552	0.441075	0.409403	0.347903		Yes	Yes	Yes	5.48842	5.65238	6.05593	0.601993	0.622259	0.528472
TraesCS1A02G223300		chr1A	393461156	393469918		-	-	-	6.54774	6.78625	7.44479	0.518852	0.473842	0.490611		Yes	-	-	1.36146	1.36196	1.09972	1.12899	1.05805	1.20269
TraesCS1A02G223700		chr1A	394252789	394261768		Yes	Yes	Yes	9.44606	10.5197	11.1828	0.505035	0.532372	0.458765		-	Yes	-	13.8581	10.6814	11.7881	0.788318	0.797747	0.709652
TraesCS1A02G223800		chr1A	394299047	394302178		-	-	-	45.0911	46.307	46.6703	0.290009	0.280272	0.252549		Yes	-	-	63.7146	62.4844	68.8709	0.272225	0.288907	0.230017
TraesCS1A02G223900		chr1A	394319588	394322386		Yes	-	-	4.3547	4.71651	5.46168	0.531139	0.411624	0.480974		-	Yes	-	6.61212	6.61224	7.18142	0.629439	0.697601	0.56965
TraesCS1A02G224000		chr1A	394325250	394328538		Yes	-	-	52.879	57.2074	59.0746	0.376172	0.336454	0.321271		-	-	-	46.1622	46.6974	53.0914	0.330606	0.269031	0.287249
TraesCS1A02G224600		chr1A	394587930	394588284		-	-	-	-	-	-	-	-	-		-	Yes	-	0.864044	0.737729	0.549842	1.66479	1.88602	1.56226
TraesCS1A02G224800		chr1A	394851597	394852955		Yes	-	-	4.26839	4.35872	4.78535	0.659736	0.588391	0.597174		-	Yes	-	5.41612	5.28729	6.0848	0.599531	0.614871	0.525088
TraesCS1A02G225000		chr1A	395172063	395180663		-	-	-	26.6077	23.571	26.9497	0.528179	0.367041	0.371851		Yes	Yes	Yes	47.2913	36.5811	34.4444	0.499921	0.561014	0.519824
TraesCS1A02G225200		chr1A	395457903	395462389		-	-	-	12.1805	11.0348	11.3455	0.409993	0.418002	0.419592		-	Yes	-	26.6019	22.8862	25.1596	0.740342	0.711338	0.794689
TraesCS1A02G225600		chr1A	396100622	396102750		Yes	-	-	4.67746	4.72004	4.69748	0.553506	0.444174	0.431732		Yes	-	-	2.1245	1.97537	2.65791	0.821246	0.787888	0.646526
TraesCS1A02G225700		chr1A	396105135	396108083		-	-	-	3.13264	3.46234	2.83081	0.739222	0.584813	0.647572		-	Yes	-	21.4186	22.9368	23.9639	0.444963	0.431756	0.377206
TraesCS1A02G225800		chr1A	396262416	396262722		-	-	-	-	0.413236	-	-	1.54389	-		-	Yes	-	35.5844	38.587	26.9298	1.37356	1.19747	1.22221
TraesCS1A02G226000		chr1A	396296934	396298607		-	-	-	0.796976	0.951581	0.822397	1.4326	1.00465	1.08933		-	Yes	-	4.49831	4.75145	2.49756	0.856864	0.71555	0.813361
TraesCS1A02G226100		chr1A	396421577	396424593		-	-	-	1.22394	1.38036	1.48093	0.836865	0.794206	0.766313		Yes	-	-	1.18218	0.862998	1.25514	1.45201	1.38072	0.79379
TraesCS1A02G226300		chr1A	396427875	396432402		Yes	-	-	12.4114	12.4691	13.0879	0.559496	0.482929	0.454712		Yes	-	-	21.4108	19.9082	19.1904	0.432404	0.43915	0.456048
TraesCS1A02G226500		chr1A	396462673	396469872		Yes	-	-	3.68811	4.09255	4.55776	0.492147	0.513614	0.411407		-	Yes	-	3.54933	3.96756	3.36612	0.846763	0.8829	0.643595
TraesCS1A02G226900		chr1A	397657982	397663340		Yes	Yes	Yes	1.9958	1.8389	2.1753	0.85417	0.614513	0.788329		Yes	-	-	1.25403	1.19646	1.30007	0.842106	1.08546	0.925982
TraesCS1A02G227000		chr1A	397737103	397743609		Yes	-	-	9.53722	10.1892	10.6444	0.42542	0.42198	0.41092		Yes	Yes	Yes	9.52053	7.84073	6.98266	0.550576	0.53597	0.636621
TraesCS1A02G227200		chr1A	397771974	397776201		-	-	-	16.9722	16.9292	18.4474	0.364848	0.331097	0.287604		-	Yes	-	12.1159	11.4095	13.8262	0.467551	0.393702	0.613331
TraesCS1A02G227300		chr1A	398050209	398053648		Yes	-	-	16.9774	18.2296	18.6532	0.409768	0.387511	0.408361		Yes	Yes	Yes	14.2208	15.4831	18.5651	0.480769	0.493798	0.427136
TraesCS1A02G227600		chr1A	398447832	398478403		-	-	-	10.2308	10.3623	11.8138	0.38437	0.319371	0.460342		-	Yes	-	6.79853	6.59852	7.17034	0.667972	0.660974	0.598356
TraesCS1A02G227700		chr1A	398666146	398670897		-	Yes	-	1.93675	2.59129	2.58848	1.07448	0.831731	0.902157		Yes	-	-	2.75266	3.07675	3.24452	0.681656	0.793043	0.697449
TraesCS1A02G228000		chr1A	399229267	399232767		-	-	-	15.9884	16.0808	17.1205	0.315679	0.26744	0.330927		-	Yes	-	12.0645	11.4696	12.3178	0.452438	0.485076	0.394534
TraesCS1A02G228100		chr1A	399242682	399246292		Yes	Yes	Yes	2.84986	2.76512	2.70361	0.933333	0.815597	0.870195		Yes	Yes	Yes	4.03315	4.4161	3.74687	0.660815	0.794777	0.635452
TraesCS1A02G228200		chr1A	399471123	399474373		-	-	-	8.57554	8.89593	8.47439	0.593567	0.43344	0.487917		Yes	Yes	Yes	3.73808	3.87501	5.0204	0.663709	0.590015	0.733147
TraesCS1A02G228300		chr1A	399491194	399508030		-	Yes	-	12.6664	11.9136	13.1394	0.506844	0.436228	0.465145		-	Yes	-	7.19547	5.89402	6.25039	0.749707	0.728266	0.697487
TraesCS1A02G228500		chr1A	399825242	399826597		Yes	Yes	Yes	6.22536	7.76587	10.8077	1.08884	0.738195	0.932827		Yes	Yes	Yes	31.255	37.8598	51.9161	0.583458	0.570161	0.465853
TraesCS1A02G228700		chr1A	400955575	400956033		-	Yes	-	4.46481	5.26761	4.46056	1.14435	0.828915	0.890698		-	Yes	-	11.5231	12.6097	11.722	0.638232	0.622198	0.544854
TraesCS1A02G228900		chr1A	400965658	400969054		Yes	-	-	4.29088	4.78537	5.29119	0.545394	0.432602	0.512195		Yes	Yes	Yes	4.86166	5.57895	6.49102	0.546697	0.527575	0.453656
TraesCS1A02G229000		chr1A	400974762	400975411		-	Yes	-	26.1819	31.5135	27.7411	0.897477	0.760122	0.694764		-	Yes	-	23.9121	26.25	22.376	0.561765	0.474401	0.542201
TraesCS1A02G229100		chr1A	401226676	401227405		-	Yes	-	8.65461	9.31832	8.05951	1.00774	0.786113	0.796956		Yes	Yes	Yes	11.7838	12.6874	12.7621	0.642585	0.573356	0.531329
TraesCS1A02G229400		chr1A	401770371	401776062		Yes	-	-	1.72569	1.93255	2.17625	0.848345	0.892409	0.8081		Yes	-	-	2.56101	2.51962	3.60332	0.70523	0.702806	0.595586
TraesCS1A02G229700		chr1A	402252751	402258921		Yes	-	-	5.30542	5.66244	6.15091	0.562639	0.430403	0.47238		-	-	-	5.46614	6.3175	6.27131	0.538068	0.523621	0.41416
TraesCS1A02G230000		chr1A	402805582	402809242		Yes	-	-	5.64153	5.61854	5.83327	0.510913	0.414427	0.420188		-	Yes	-	5.88361	5.98431	5.99777	0.574619	0.707481	0.561872
TraesCS1A02G230100		chr1A	402920832	402930504		-	-	-	10.2904	11.1687	12.318	0.364329	0.377625	0.351663		-	Yes	-	12.2218	12.9414	13.7449	0.527047	0.520225	0.482157
TraesCS1A02G230300		chr1A	402941256	402946713		Yes	-	-	1.43446	1.6565	1.80464	0.87289	0.84678	0.875615		-	-	-	-	-	-	-	-	-
TraesCS1A02G230500		chr1A	403026893	403031517		-	-	-	0.418244	0.391656	0.340231	1.41051	1.45139	1.69		Yes	Yes	Yes	2.09496	1.92573	1.68463	1.03405	1.00183	1.02004
TraesCS1A02G230600		chr1A	403361807	403386327		-	-	-	5.27354	5.13402	5.55582	0.493286	0.476296	0.598925		-	Yes	-	7.36689	7.01873	7.4949	0.650704	0.535037	0.485798
TraesCS1A02G231000		chr1A	403634444	403634938		-	-	-	2.1081	1.82668	1.96495	0.735276	0.807642	0.728097		-	Yes	-	3.38818	2.92912	3.36925	1.16924	0.804168	0.729383
TraesCS1A02G231100		chr1A	403655015	403662722		-	-	-	15.1935	15.1876	16.6765	0.34686	0.323861	0.324533		Yes	-	-	13.4674	12.1491	11.8103	0.477516	0.503161	0.405786
TraesCS1A02G231200		chr1A	403830277	403831326		Yes	Yes	Yes	5.23626	4.77812	5.65194	1.34746	1.05108	1.18214		Yes	Yes	Yes	14.6308	16.4142	17.6004	0.753852	0.680442	0.62104
TraesCS1A02G231500		chr1A	404625536	404628901		-	-	-	1.3428	1.42623	1.65471	0.90246	0.796659	1.25035		Yes	Yes	Yes	25.8316	27.1319	30.3634	0.715102	0.548024	0.428242
TraesCS1A02G232000		chr1A	405517313	405522682		Yes	-	-	1.17234	1.37975	1.28834	0.995332	0.847428	1.02508		Yes	-	-	1.27944	1.5009	0.943395	1.00051	1.41456	1.0492
TraesCS1A02G232300		chr1A	405792027	405799327		-	Yes	-	2.29416	2.26296	2.95373	0.890218	0.758291	0.691585		-	Yes	-	1.52577	1.4695	1.53533	1.15858	1.13764	1.09632
TraesCS1A02G232900		chr1A	406186564	406190999		-	-	-	0.688426	0.672286	1.1252	1.15071	1.19601	1.33426		Yes	-	-	1.17032	1.25013	1.10867	1.07822	1.19602	1.0323
TraesCS1A02G233200		chr1A	407114550	407117132		-	-	-	13.9974	14.8312	15.2127	0.340121	0.299195	0.273183		-	Yes	-	16.3982	18.1477	17.3105	0.363598	0.445706	0.413242
TraesCS1A02G233400		chr1A	407315145	407320459		-	-	-	2.537	2.95269	2.86334	0.760417	0.551853	0.681765		Yes	-	-	2.39586	2.25247	2.72672	0.863736	0.675035	0.71126
TraesCS1A02G233500		chr1A	407323417	407329088		-	-	-	1.88145	2.12613	2.19309	0.673239	0.565098	0.747497		Yes	-	-	2.1941	2.25763	2.45126	1.05429	0.838513	0.646132
TraesCS1A02G233600		chr1A	407330835	407335966		-	-	-	12.2235	12.7656	13.1128	0.330623	0.287898	0.35033		Yes	-	-	8.3564	8.34073	9.47027	0.501437	0.490475	0.518823
TraesCS1A02G233700		chr1A	408485600	408488677		-	-	-	33.8304	35.5138	36.4952	0.268382	0.207669	0.251649		Yes	-	-	36.946	40.7474	43.7548	0.311386	0.325629	0.300747
TraesCS1A02G233800		chr1A	408491115	408493891		-	-	-	0.452459	0.508074	0.454302	1.2201	1.23089	1.37439		-	Yes	-	1.497	1.91998	1.85787	1.04789	0.973274	0.845482
TraesCS1A02G234100		chr1A	409782353	409790410		-	-	-	1.11786	1.34727	1.39281	0.892171	0.880594	0.943118		Yes	-	-	2.33591	2.29442	2.14611	0.878139	0.884938	0.750302
TraesCS1A02G234600		chr1A	410152902	410157058		-	Yes	-	25.447	23.3206	21.6068	1.30426	1.0263	0.897699		Yes	Yes	Yes	47.9089	30.3927	14.1525	0.83414	0.898901	0.885868
TraesCS1A02G234900		chr1A	413782217	413798673		-	-	-	8.04282	7.80267	8.66204	0.446297	0.320738	0.384293		-	Yes	-	12.4082	11.2748	11.4073	0.514911	0.579331	0.520362
TraesCS1A02G235000		chr1A	415297273	415299492		Yes	Yes	Yes	4.4745	5.82609	7.82074	1.08359	1.33664	0.979148		-	Yes	-	3.59332	3.66782	3.59629	0.833432	0.931025	0.844299
TraesCS1A02G235100		chr1A	415580729	415585379		-	Yes	-	16.431	15.6826	17.4665	0.76364	0.734763	0.699327		Yes	Yes	Yes	31.9876	28.5733	21.28	0.475257	0.482424	0.50618
TraesCS1A02G235200		chr1A	415634920	415641652		-	Yes	-	2.12246	1.85873	1.81681	0.742765	0.652424	0.748592		-	Yes	-	8.86323	9.25253	9.8041	0.650368	0.560762	0.523471
TraesCS1A02G235500		chr1A	416536877	416540167		-	-	-	9.21886	8.82162	10.0317	0.409693	0.332003	0.516217		-	Yes	-	9.87572	9.83837	9.59307	0.462883	0.506171	0.41374
TraesCS1A02G235600		chr1A	416542613	416546310		-	-	-	23.2062	22.3098	24.433	0.270804	0.226055	0.24444		Yes	Yes	Yes	26.1224	27.9098	30.8187	0.42813	0.405262	0.372131
TraesCS1A02G235900		chr1A	418034034	418040242		Yes	-	-	1.19828	1.33137	1.31306	0.954054	0.84355	0.830576		-	-	-	1.37185	1.46668	1.45061	1.17805	1.36955	1.01149
TraesCS1A02G236000		chr1A	418041086	418046903		-	Yes	-	8.29024	9.9243	8.77637	0.74614	0.505841	0.610957		Yes	Yes	Yes	10.9178	10.552	12.1695	0.614792	0.473066	0.399993
TraesCS1A02G236100		chr1A	418049851	418057245		-	Yes	-	4.72784	4.16925	5.3367	0.845974	0.76656	1.09883		-	Yes	-	2.75752	2.7334	2.99855	1.03061	1.0791	1.01202
TraesCS1A02G236400		chr1A	418933738	418936268		Yes	Yes	Yes	6.37057	5.94509	7.26238	0.735472	0.60401	0.624682		-	-	-	5.71864	4.93505	4.10731	0.735042	0.524253	0.614416
TraesCS1A02G236500		chr1A	418936644	418939887		-	Yes	-	4.56424	4.56845	4.45059	0.491926	0.441186	0.572834		Yes	Yes	Yes	7.79125	6.44888	6.28942	0.644689	0.601388	0.64786
TraesCS1A02G236600		chr1A	419028888	419037606		Yes	-	-	7.33393	7.11132	8.62643	0.421425	0.400797	0.441088		-	-	-	12.2109	11.0948	11.6359	0.400927	0.3444	0.399123
TraesCS1A02G237100		chr1A	420394346	420397136		-	-	-	1.53291	1.81188	1.93382	0.897487	0.724283	0.685192		Yes	-	-	1.47846	1.56366	1.59467	1.03146	1.30659	0.776251
TraesCS1A02G237200		chr1A	420509962	420520292		-	-	-	0.886713	1.04017	1.23513	0.890404	0.723142	0.943408		Yes	-	-	1.15087	0.746516	0.986301	1.1872	1.52066	1.1662
TraesCS1A02G237800		chr1A	423675499	423676890		-	-	-	12.7141	14.4509	14.4839	0.389222	0.291594	0.318391		Yes	Yes	Yes	2.55746	2.29397	2.33769	0.711854	0.807817	0.887424
TraesCS1A02G238100		chr1A	423948295	423949193		-	-	-	-	-	-	-	-	-		Yes	Yes	Yes	2.74163	3.33697	3.99489	0.763077	1.00054	0.837703
TraesCS1A02G238600		chr1A	425252499	425258158		-	-	-	0.958527	0.764218	1.20915	1.32462	0.914895	1.23178		Yes	-	-	0.864173	0.955832	1.00648	1.3167	1.38308	1.23787
TraesCS1A02G238700		chr1A	425255500	425265407		Yes	Yes	Yes	88.7988	81.5802	80.2774	0.519697	0.515245	0.472208		-	Yes	-	119.983	114.528	103.612	0.470526	0.454907	0.428862
TraesCS1A02G238800		chr1A	425680688	425681800		-	-	-	8.43888	8.83888	9.28441	0.665027	0.56467	0.536759		-	Yes	-	22.467	25.0144	19.4148	0.688184	0.780568	0.733758
TraesCS1A02G238900		chr1A	425713178	425734042		Yes	-	-	16.7636	16.195	18.0488	0.4208	0.319675	0.338228		Yes	Yes	Yes	10.9544	10.2507	9.86395	0.693798	0.544855	0.466138
TraesCS1A02G239000		chr1A	426299171	426304342		-	-	-	13.4111	13.3764	14.7966	0.386578	0.331752	0.370878		Yes	Yes	Yes	5.09456	4.6789	4.55048	0.697762	0.688128	0.817559
TraesCS1A02G239100		chr1A	426518618	426523264		-	-	-	21.8956	21.7224	22.7179	0.315596	0.23664	0.271561		Yes	Yes	Yes	29.0094	25.9042	23.9577	0.491878	0.481524	0.443593
TraesCS1A02G239400		chr1A	426728774	426730679		Yes	Yes	Yes	2.83883	2.17919	2.44809	0.918967	1.01335	1.14068		-	-	-	-	-	-	-	-	-
TraesCS1A02G239500		chr1A	426872831	426876689		Yes	-	-	1.37447	1.24654	1.08441	0.859051	0.950624	0.917828		-	-	-	-	-	-	-	-	-
TraesCS1A02G239600		chr1A	426880667	426882655		Yes	Yes	Yes	9.10351	7.90142	6.47777	0.715968	0.742724	0.742274		-	Yes	-	28.0803	26.7257	28.8771	0.69652	0.672374	0.647137
TraesCS1A02G239700		chr1A	426886834	426888858		Yes	Yes	Yes	5.22696	4.38333	3.80683	0.869907	0.637307	0.671004		Yes	Yes	Yes	33.5422	34.342	33.9093	0.653854	0.521196	0.510734
TraesCS1A02G239800		chr1A	426888747	426892014		Yes	-	-	13.6821	13.5931	14.4949	0.416508	0.386954	0.350699		Yes	-	-	23.6597	22.194	20.4619	0.313021	0.334435	0.340529
TraesCS1A02G240000		chr1A	426929586	426933776		Yes	-	-	5.15471	5.25688	5.07947	0.462923	0.443817	0.49872		-	Yes	-	5.19426	5.37675	5.02899	0.582568	0.703832	0.555341
TraesCS1A02G240100		chr1A	427037674	427041154		-	-	-	0.662974	0.887752	0.801491	1.25936	0.943524	1.2529		Yes	-	-	1.08969	0.794197	1.33029	1.48428	1.01322	1.02618
TraesCS1A02G240200		chr1A	427048240	427049359		Yes	Yes	Yes	1.69358	1.68561	1.67841	0.689954	0.7257	0.77172		-	Yes	-	10.0927	10.1081	8.72682	0.557214	0.50326	0.489957
TraesCS1A02G240300		chr1A	427482373	427485361		-	Yes	-	3.62259	4.34246	4.5962	0.744912	0.529647	0.609087		-	Yes	-	14.6208	14.2055	15.4487	0.424194	0.453906	0.328277
TraesCS1A02G240500		chr1A	427811334	427813937		-	-	-	-	0.420638	-	-	1.42513	-		-	Yes	-	1.45211	1.79634	1.02591	0.938168	1.06528	1.04446
TraesCS1A02G240600		chr1A	427814329	427823554		-	-	-	8.04533	8.88532	9.48031	0.425715	0.378533	0.378287		-	Yes	-	8.70924	8.38428	8.69167	0.519299	0.463813	0.47616
TraesCS1A02G241000		chr1A	428546384	428550024		-	Yes	-	31.8724	29.3493	32.4417	0.407402	0.358365	0.370979		-	Yes	-	2.03935	1.57967	2.40461	1.09966	1.01679	1.02288
TraesCS1A02G241100		chr1A	428663706	428664650		-	-	-	0.340339	-	-	1.52	-	-		Yes	Yes	Yes	15.3633	18.6342	19.1763	0.751513	0.792062	0.685161
TraesCS1A02G241300		chr1A	428972917	428979705		Yes	-	-	10.9739	11.5349	12.6742	0.480095	0.348301	0.464494		Yes	Yes	Yes	14.519	13.6449	14.3298	0.50662	0.503554	0.486483
TraesCS1A02G241400		chr1A	429002155	429003928		-	-	-	-	-	-	-	-	-		Yes	Yes	Yes	2.59203	2.77383	2.98713	0.861222	0.849576	0.709253
TraesCS1A02G241800		chr1A	430006818	430008755		-	-	-	1.69443	2.22666	1.71647	0.837501	0.609329	0.805766		-	Yes	-	6.00345	6.81107	6.22951	0.616454	0.533047	0.581593
TraesCS1A02G241900		chr1A	430177937	430181778		-	-	-	80.8563	84.9208	71.7983	0.286354	0.272827	0.27823		-	Yes	-	5.06832	5.61334	4.9099	0.625949	0.713024	0.566853
TraesCS1A02G242000		chr1A	430188372	430190090		Yes	-	-	1.77546	1.60189	1.61515	1.08006	1.10358	1.05361		-	-	-	-	-	-	-	-	-
TraesCS1A02G242100		chr1A	430231589	430234732		Yes	-	-	2.45058	2.83043	2.8243	0.667507	0.613121	0.581622		Yes	Yes	Yes	2.97241	2.77153	2.40862	0.75028	0.798057	0.941545
TraesCS1A02G242400		chr1A	430342573	430344319		Yes	Yes	Yes	11.2379	10.7697	13.1546	1.45418	1.33037	1.1703		Yes	Yes	Yes	12.063	11.0984	8.44104	0.553754	0.622508	0.544581
TraesCS1A02G242500		chr1A	430584230	430591637		Yes	-	-	4.64094	5.58745	6.26992	0.495484	0.47097	0.482929		Yes	Yes	Yes	1.4962	1.48297	1.93229	0.9888	1.29599	0.886911
TraesCS1A02G242900		chr1A	430624438	430626106		Yes	Yes	Yes	10.5544	10.4996	12.4766	0.507688	0.422593	0.408157		Yes	Yes	Yes	15.9772	16.3053	19.0332	0.477622	0.413999	0.362829
TraesCS1A02G243000		chr1A	431013711	431016801		-	-	-	19.2831	18.0838	20.121	0.467652	0.425935	0.433891		Yes	Yes	Yes	24.9651	21.7511	21.2604	0.43499	0.422249	0.396348
TraesCS1A02G243100		chr1A	431017431	431031404		Yes	-	-	6.8557	7.87099	8.64008	0.3987	0.373074	0.455416		-	-	-	4.14763	4.74083	3.90592	0.537003	0.710217	0.507932
TraesCS1A02G243200		chr1A	431431127	431435660		Yes	Yes	Yes	5.78361	6.01509	6.51111	0.809217	0.584971	0.587019		Yes	-	-	1.61712	1.68185	2.25285	1.15741	0.959413	0.805764
TraesCS1A02G243300		chr1A	431776449	431780693		Yes	Yes	Yes	5.71777	5.96619	6.34542	0.579718	0.435669	0.454448		-	-	-	6.84271	6.45509	7.48881	0.545989	0.633614	0.4218
TraesCS1A02G243700		chr1A	432193618	432202573		-	-	-	14.3182	13.7153	14.8346	0.360022	0.311603	0.325987		Yes	Yes	Yes	2.63258	2.47096	2.70105	1.02514	0.836586	0.847667
TraesCS1A02G244700		chr1A	432765221	432771742		Yes	-	-	7.69646	7.66949	8.31215	0.454216	0.416044	0.443814		-	Yes	-	5.38176	5.15433	4.99916	0.641015	0.557708	0.517889
TraesCS1A02G244900		chr1A	432951799	432959237		-	-	-	9.48724	9.5637	10.0749	0.412486	0.435244	0.461917		Yes	Yes	Yes	40.9394	37.1189	35.3534	0.756576	0.740098	0.619695
TraesCS1A02G245000		chr1A	432973060	432987608		-	-	-	10.9555	10.0323	11.6605	0.394157	0.36319	0.356741		-	Yes	-	12.9635	11.8447	13.2247	0.516801	0.58039	0.525439
TraesCS1A02G245300		chr1A	434419691	434428750		-	-	-	7.31432	7.25217	8.21365	0.539146	0.38533	0.509303		Yes	Yes	Yes	8.58242	7.50239	8.42968	0.644373	0.611243	0.565588
TraesCS1A02G245500		chr1A	434638559	434641445		Yes	-	-	5.09009	4.9413	5.29152	0.474451	0.477746	0.470221		Yes	Yes	Yes	2.03989	2.75668	3.01202	1.06549	0.902794	0.850015
TraesCS1A02G245600		chr1A	434871480	434878257		Yes	-	-	10.374	10.4356	13.4024	0.403386	0.432493	0.444057		-	Yes	-	16.785	15.3818	18.5475	0.498997	0.605198	0.57704
TraesCS1A02G245700		chr1A	435057160	435064141		-	-	-	0.91055	1.04983	1.12936	1.12028	0.876115	1.08156		Yes	-	-	0.8131	0.801338	1.05751	1.24048	1.35677	1.60415
TraesCS1A02G246400		chr1A	436422894	436426639		-	Yes	-	2.64187	2.15596	2.52628	1.00876	0.93079	1.03801		-	Yes	-	2.58143	2.3261	2.56479	0.922949	1.01221	0.803478
TraesCS1A02G246500		chr1A	436429225	436435467		Yes	Yes	Yes	9.29806	7.69732	8.37125	0.574219	0.579492	0.642506		-	Yes	-	17.2667	15.9078	16.5389	0.524151	0.607005	0.627652
TraesCS1A02G246600		chr1A	436435966	436440510		-	-	-	38.3317	36.4732	33.2105	0.231125	0.245043	0.250655		Yes	-	-	36.1143	38.3237	40.6062	0.311271	0.284133	0.284785
TraesCS1A02G246700		chr1A	437227745	437232712		-	-	-	2.15392	1.96324	2.21482	0.641218	0.670954	0.779228		-	Yes	-	3.06535	2.77633	2.74802	0.752315	0.715419	0.643972
TraesCS1A02G247100		chr1A	438365795	438368421		Yes	-	-	9.16018	9.53996	11.5047	0.485292	0.392927	0.368956		-	-	-	1.94576	2.18792	2.15187	0.787078	0.947554	0.738451
TraesCS1A02G247200		chr1A	438684369	438688797		-	-	-	4.83318	4.73946	5.36173	0.49095	0.436314	0.481483		Yes	-	-	6.15932	6.30986	6.43882	0.636528	0.57395	0.477833
TraesCS1A02G247500		chr1A	439066057	439074664		Yes	Yes	Yes	5.93397	6.66122	7.48303	0.881899	0.669657	0.629252		Yes	Yes	Yes	3.50776	3.34565	3.52984	1.01757	0.834528	0.726286
TraesCS1A02G247700		chr1A	439723133	439727622		-	-	-	0.854762	0.777264	0.933206	1.00547	0.966433	0.908379		Yes	-	-	1.15935	1.17512	0.926669	1.1792	1.19991	1.04137
TraesCS1A02G247900		chr1A	440019652	440029391		-	Yes	-	11.2877	9.84319	12.9484	0.594623	0.447508	0.750822		Yes	Yes	Yes	6.4694	5.51781	5.7885	0.742066	0.622744	0.638916
TraesCS1A02G248100		chr1A	440072480	440074799		Yes	Yes	Yes	4.90352	5.63788	5.99241	0.504197	0.509799	0.486664		-	Yes	-	2.98675	2.86422	3.03187	0.879324	0.869184	0.785394
TraesCS1A02G248200		chr1A	440183810	440187326		-	-	-	3.27742	3.58092	3.61929	0.501707	0.474964	0.480932		-	Yes	-	5.71613	5.87962	5.14253	0.540771	0.56095	0.521248
TraesCS1A02G248300		chr1A	440412865	440416040		Yes	Yes	Yes	6.00955	6.11922	5.52307	0.776026	0.698732	0.673262		Yes	Yes	Yes	5.98278	6.27936	7.45609	0.745815	0.663456	0.676752
TraesCS1A02G248400		chr1A	440440919	440457450		-	-	-	13.9659	13.4954	15.5782	0.384586	0.347079	0.293523		-	Yes	-	13.412	11.8813	14.206	0.580597	0.660259	0.590706
TraesCS1A02G248600		chr1A	440783363	440796745		Yes	-	-	4.5269	4.67015	5.48395	0.559172	0.467776	0.580373		-	Yes	-	2.26599	2.19314	2.42459	0.782132	0.845355	0.783922
TraesCS1A02G248700		chr1A	440800855	440802058		Yes	Yes	Yes	1.50844	1.20125	1.46822	1.22965	1.36797	1.49568		-	Yes	-	211.087	219.414	159.154	0.414267	0.444817	0.525437
TraesCS1A02G248800		chr1A	440886442	440891002		Yes	Yes	Yes	6.23887	5.6939	5.99785	0.522545	0.426414	0.470219		-	Yes	-	12.358	9.90853	10.4232	0.642122	0.610056	0.597981
TraesCS1A02G249000		chr1A	441031693	441033979		-	-	-	4.1373	4.36943	4.23772	0.885676	0.663216	0.659117		Yes	Yes	Yes	3.02535	3.06212	4.23844	0.822391	0.671578	0.695858
TraesCS1A02G249100		chr1A	441107312	441111912		Yes	Yes	Yes	3.29805	3.54718	3.53656	0.978712	0.692527	0.806725		Yes	Yes	Yes	3.86336	4.09233	4.98226	0.793929	0.769892	0.723102
TraesCS1A02G249300		chr1A	441183588	441185735		Yes	-	-	8.2047	9.14742	8.87566	0.428367	0.362538	0.40991		-	Yes	-	13.6689	12.9709	12.4931	0.394207	0.461372	0.403561
TraesCS1A02G249400		chr1A	441235402	441245178		-	-	-	14.1669	13.4723	16.8646	0.390776	0.319172	0.594467		-	Yes	-	14.3653	14.3493	14.3078	0.545515	0.655701	0.513129
TraesCS1A02G249500		chr1A	441751925	441756669		-	Yes	-	3.26818	3.62084	3.59302	0.815625	0.635338	0.751125		-	-	-	-	-	-	-	-	-
TraesCS1A02G249600		chr1A	441763844	441766750		-	Yes	-	14.1557	12.4414	14.9581	0.67847	0.743728	0.775391		-	Yes	-	1.8929	1.86885	2.9738	0.923616	1.0377	0.910432
TraesCS1A02G249800		chr1A	441797721	441800648		-	-	-	0.751947	0.604312	0.800951	2.1714	1.83412	1.78467		-	Yes	-	3.45426	4.03882	3.52701	0.768696	0.774797	0.642364
TraesCS1A02G250000		chr1A	441841792	441843417		Yes	Yes	Yes	3.63797	3.98765	4.42174	1.32227	1.47047	1.25874		Yes	Yes	Yes	35.8361	34.8102	32.2985	0.662998	0.758216	0.618162
TraesCS1A02G250100		chr1A	441927241	441929536		Yes	-	-	8.94666	9.38666	9.93588	0.497016	0.429122	0.445441		-	-	-	-	-	-	-	-	-
TraesCS1A02G250300		chr1A	441954667	441957069		-	-	-	52.4706	55.1123	51.7037	0.263399	0.224322	0.256383		Yes	Yes	Yes	75.1708	77.6341	79.5637	0.316929	0.334429	0.329101
TraesCS1A02G250400		chr1A	442124887	442126086		-	-	-	11.0274	10.4845	10.5789	0.408971	0.307784	0.366034		Yes	Yes	Yes	9.54693	8.7986	8.53037	0.456822	0.47969	0.394555
TraesCS1A02G250500		chr1A	442154862	442155978		-	Yes	-	5.36296	5.55372	5.15403	0.633818	0.532838	0.585581		-	Yes	-	7.9511	9.32503	7.87823	0.611165	0.623888	0.563149
TraesCS1A02G250700		chr1A	442470888	442476407		-	Yes	-	2.44425	2.57367	2.75159	0.868037	0.669387	0.744153		Yes	-	-	1.10001	1.24206	1.72848	0.959285	0.935444	0.854603
TraesCS1A02G250800		chr1A	442553712	442560898		Yes	-	-	7.01022	6.75956	7.01329	0.415322	0.454239	0.417611		Yes	Yes	Yes	4.96148	4.97131	5.47832	0.613351	0.525493	0.496314
TraesCS1A02G251000		chr1A	442563512	442567349		-	-	-	4.27089	3.88335	5.18608	0.613925	0.586734	0.61119		-	Yes	-	3.37764	4.03458	3.64107	0.75706	0.779113	0.685112
TraesCS1A02G251100		chr1A	442606330	442613294		-	-	-	5.1435	5.06347	4.6684	0.434245	0.410017	0.433825		Yes	-	-	11.2282	11.5741	12.6838	0.494583	0.393813	0.381316
TraesCS1A02G251200		chr1A	442613331	442614743		-	Yes	-	98.5773	97.3841	92.1652	0.300918	0.287997	0.31011		-	-	-	-	0.309323	0.315849	-	2.28572	2.43643
TraesCS1A02G251400		chr1A	442800491	442808502		-	Yes	-	17.6997	18.9046	18.5421	0.508608	0.536687	0.561144		Yes	Yes	Yes	10.4226	11.3306	12.9858	0.616149	0.686209	0.627256
TraesCS1A02G251700		chr1A	443198967	443211104		-	-	-	12.1666	12.351	14.3613	0.367811	0.36063	0.347512		-	Yes	-	16.1543	14.3607	15.6024	0.488451	0.516618	0.449874
TraesCS1A02G251800		chr1A	443659415	443660791		-	-	-	1.28046	1.23786	1.21867	0.838517	0.722492	0.737116		Yes	-	-	1.68174	1.86933	2.07139	0.865731	0.984508	1.24067
TraesCS1A02G251900		chr1A	443703298	443704605		Yes	Yes	Yes	9.72229	8.65217	6.9445	0.660221	0.792118	0.596819		Yes	Yes	Yes	12.0516	10.3201	8.95935	0.640087	0.565195	0.590008
TraesCS1A02G252000		chr1A	443708369	443712092		Yes	-	-	12.1322	11.7492	11.0233	0.445202	0.324162	0.424681		-	Yes	-	11.2094	9.8582	10.2845	0.57877	0.543714	0.572248
TraesCS1A02G252300		chr1A	444122390	444123580		-	Yes	-	2.83572	2.5444	2.85964	0.714356	0.73256	0.718581		-	-	-	0.512715	0.398253	0.511687	1.47212	1.40513	1.28386
TraesCS1A02G252400		chr1A	444124496	444127602		-	-	-	48.4128	49.6084	44.5614	0.24401	0.224487	0.250306		Yes	-	-	3.59877	3.3665	3.56566	0.663735	0.59986	0.603269
TraesCS1A02G252500		chr1A	444127613	444129639		Yes	-	-	1.88933	2.1121	2.11018	0.735534	0.670376	0.663221		-	Yes	-	3.45747	3.35087	3.4484	0.801946	0.66912	0.547253
TraesCS1A02G252600		chr1A	444136296	444137772		-	-	-	-	-	-	-	-	-		Yes	-	-	2.71702	2.23401	2.12492	1.00023	0.891373	0.859809
TraesCS1A02G253000		chr1A	444255168	444257615		-	-	-	13.463	13.7851	15.7595	0.382467	0.383714	0.318898		Yes	-	-	15.5442	13.8102	13.9475	0.426928	0.370536	0.375922
TraesCS1A02G253200		chr1A	444768026	444776770		Yes	Yes	Yes	3.18606	3.33002	3.78526	0.666132	0.809057	0.726977		-	-	-	-	-	-	-	-	-
TraesCS1A02G253400		chr1A	445257710	445277310		-	Yes	-	75.2987	73.314	74.7079	0.318882	0.325977	0.284964		-	Yes	-	27.1839	19.8932	20.3327	0.943172	1.01048	0.744853
TraesCS1A02G253500		chr1A	445502456	445504241		-	-	-	-	-	-	-	-	-		-	Yes	-	1.35915	1.19761	1.06121	1.01638	1.36385	1.20223
TraesCS1A02G253900		chr1A	445541463	445544679		-	-	-	7.42456	6.77751	7.32278	0.519246	0.454739	0.59418		-	Yes	-	2.80229	2.92746	2.93994	0.717788	0.696163	0.648235
TraesCS1A02G254000		chr1A	445546796	445549613		-	Yes	-	4.40731	4.16431	4.88074	0.783175	0.690607	0.603486		-	-	-	0.559009	0.463305	-	1.2757	1.51583	-
TraesCS1A02G254100		chr1A	445653716	445656457		Yes	-	-	6.5	6.29491	6.75519	0.536923	0.422607	0.580302		Yes	-	-	18.0882	18.0392	16.4032	0.357679	0.407499	0.368845
TraesCS1A02G254200		chr1A	445878772	445885091		-	-	-	28.8814	27.8986	27.9102	0.293326	0.285298	0.279673		Yes	Yes	Yes	66.4574	61.809	55.5251	0.386543	0.429225	0.40296
TraesCS1A02G254400		chr1A	445914781	445917729		-	Yes	-	15.476	14.6105	14.9478	0.52772	0.548112	0.543068		Yes	-	-	0.903244	0.774707	0.763823	1.2687	1.28451	1.32301
TraesCS1A02G254500		chr1A	445934353	445938890		Yes	Yes	Yes	5.83178	4.90597	4.8649	0.657528	0.632296	0.605793		Yes	Yes	Yes	2.45185	2.07177	1.62121	1.05238	0.934781	0.939368
TraesCS1A02G255000		chr1A	446541862	446549281		-	-	-	21.5532	19.4659	22.0296	0.424666	0.386132	0.38401		-	Yes	-	5.66791	4.78847	5.6274	0.688366	0.627426	0.62959
TraesCS1A02G255100		chr1A	447005332	447007022		-	-	-	1.45908	1.5256	1.85621	0.983277	1.02582	0.80593		-	Yes	-	4.17931	3.7845	5.18423	0.776384	0.73615	0.749279
TraesCS1A02G255200		chr1A	447112678	447120162		Yes	-	-	1.36539	1.46151	1.92155	0.812579	0.838469	0.732633		Yes	Yes	Yes	2.76273	2.4509	3.09008	0.914869	0.992902	0.641372
TraesCS1A02G255300		chr1A	447623204	447635025		Yes	-	-	10.4818	9.78355	10.6031	0.388383	0.327626	0.366337		Yes	Yes	Yes	12.697	13.2486	14.8769	0.420136	0.452254	0.360585
TraesCS1A02G255400		chr1A	447640539	447644424		-	-	-	74.7022	70.4315	76.1414	0.435202	0.430543	0.45378		Yes	Yes	Yes	78.2793	70.0962	60.762	0.565297	0.495645	0.576761
TraesCS1A02G255800		chr1A	448033492	448037889		Yes	-	-	28.4874	29.7346	26.0215	0.534298	0.505783	0.49506		-	Yes	-	2.55913	1.95009	2.42313	1.02406	0.846005	0.91508
TraesCS1A02G255900		chr1A	448627007	448629624		-	-	-	1.82123	1.65234	1.76774	0.710932	0.670737	0.686866		-	Yes	-	3.03326	2.85234	2.81882	0.681617	0.854722	0.689435
TraesCS1A02G256100		chr1A	448897530	448912063		Yes	-	-	1.97954	2.11443	2.23414	0.659229	0.637626	0.612578		-	-	-	0.792901	0.567307	0.904269	1.23787	1.52496	1.89834
TraesCS1A02G256200		chr1A	448912374	448915764		-	-	-	1.51753	1.74512	1.70815	0.844946	0.619306	0.661605		Yes	-	-	0.950606	0.726333	1.25987	1.95028	1.05172	1.01115
TraesCS1A02G256300		chr1A	448918314	448924958		-	-	-	38.1632	37.693	44.0321	0.312166	0.290369	0.237933		-	Yes	-	41.1859	37.3307	38.6764	0.442199	0.421691	0.389998
TraesCS1A02G256800		chr1A	449195771	449201684		-	Yes	-	3.27171	3.63982	3.58241	0.792273	0.664709	0.714064		-	-	-	3.68333	3.38822	3.71553	0.708734	0.694817	0.718203
TraesCS1A02G257100		chr1A	449511677	449512442		-	-	-	0.808331	0.786672	0.902659	0.957283	1.05318	1.12561		Yes	-	-	0.534806	0.575044	0.772061	1.47275	1.84564	1.57041
TraesCS1A02G257200		chr1A	449518415	449520334		Yes	-	-	1.18918	1.35668	1.62235	1.06134	1.20239	0.98319		Yes	Yes	Yes	4.51497	4.61832	5.30808	0.780891	0.715005	0.653502
TraesCS1A02G257300		chr1A	449555198	449558720		Yes	Yes	Yes	10.9931	9.24805	9.25562	0.527767	0.413172	0.460238		Yes	Yes	Yes	15.8309	13.7656	12.6435	0.433846	0.435528	0.533224
TraesCS1A02G257400		chr1A	449623117	449626157		Yes	Yes	Yes	4.71798	5.6281	8.46825	0.981377	1.06525	1.04254		-	-	-	0.444138	0.516862	0.496391	1.55788	1.85837	1.62717
TraesCS1A02G257500		chr1A	449665161	449666231		-	-	-	1.01131	0.78248	0.769635	1.19483	1.15934	1.2198		Yes	Yes	Yes	3.00641	3.05023	3.2001	1.20588	1.14414	0.942665
TraesCS1A02G257900		chr1A	449820375	449831326		Yes	Yes	Yes	6.8074	6.83295	6.57678	0.473602	0.423476	0.532836		Yes	-	-	1.38897	1.33722	1.73185	1.1068	1.05601	0.970144
TraesCS1A02G258100		chr1A	449853942	449857196		-	-	-	5.9236	5.55883	6.67882	0.49306	0.498638	0.414058		Yes	-	-	9.19121	8.33814	8.11973	0.526212	0.501351	0.471821
TraesCS1A02G258300		chr1A	450092812	450097229		Yes	-	-	1.62414	1.79736	1.77317	0.936462	0.71724	0.839101		-	-	-	-	-	-	-	-	-
TraesCS1A02G258400		chr1A	451280508	451282597		Yes	-	-	4.90749	5.4772	5.70869	0.558378	0.476608	0.527836		-	Yes	-	7.15289	6.01242	6.16007	0.602356	0.548886	0.536293
TraesCS1A02G258500		chr1A	451617712	451619073		-	Yes	-	2.58608	3.64458	3.1474	0.933306	0.697924	0.744381		Yes	Yes	Yes	1.60822	2.0885	2.92887	1.24484	1.02798	0.89811
TraesCS1A02G258800		chr1A	452018321	452021152		-	Yes	-	50.7397	55.862	47.9846	0.455485	0.43942	0.455569		-	-	-	37.8193	37.5751	39.1727	0.360941	0.326885	0.332868
TraesCS1A02G259000		chr1A	452042146	452046460		-	-	-	20.1326	18.3473	17.1674	0.341883	0.284126	0.298719		Yes	Yes	Yes	11.7363	10.6758	10.6159	0.446945	0.470414	0.409422
TraesCS1A02G259200		chr1A	452280749	452284447		-	-	-	30.7257	30.5167	30.8335	0.4006	0.403987	0.344955		-	Yes	-	37.498	34.7775	36.6809	0.396876	0.469052	0.451709
TraesCS1A02G259500		chr1A	452753443	452757351		Yes	-	-	5.66805	5.94278	6.02218	0.646401	0.64475	0.647786		-	Yes	-	4.77412	4.69756	4.16474	0.719426	0.656433	0.631783
TraesCS1A02G259700		chr1A	452784057	452786582		Yes	-	-	90.2411	90.8155	82.7929	0.283299	0.293436	0.340025		-	Yes	-	2.66245	2.81295	2.69857	0.882201	0.827511	0.610544
TraesCS1A02G259800		chr1A	452857082	452865313		-	Yes	-	16.6357	18.684	18.3882	0.554226	0.423501	0.522804		-	Yes	-	6.46392	6.98073	6.86007	0.616264	0.583641	0.535972
TraesCS1A02G260100		chr1A	454033522	454037971		Yes	-	-	4.06366	3.96103	3.99115	0.625756	0.535462	0.62538		-	Yes	-	5.05689	4.81406	4.9894	0.710737	0.734531	0.58926
TraesCS1A02G260200		chr1A	454329423	454334823		Yes	-	-	2.00599	2.37088	2.46511	0.750954	0.650367	0.613916		Yes	-	-	1.28923	1.69991	1.86261	0.990255	0.935884	0.860938
TraesCS1A02G260300		chr1A	454335485	454339778		Yes	-	-	6.79857	6.38693	7.30131	0.380238	0.327789	0.37233		-	-	-	1.00757	1.02414	1.30432	1.06568	1.52323	0.932882
TraesCS1A02G260500		chr1A	454516009	454523565		-	Yes	-	10.723	12.1978	11.8106	0.857596	0.690958	0.709339		-	Yes	-	8.59084	9.20478	8.34459	0.646879	0.757146	0.65173
TraesCS1A02G260700		chr1A	454533588	454534849		Yes	Yes	Yes	5.3897	5.12314	4.62739	0.594978	0.51182	0.584277		-	Yes	-	21.1388	20.6502	20.5533	0.459898	0.478344	0.405014
TraesCS1A02G261000		chr1A	455031001	455038358		-	-	-	50.3803	48.4601	50.9825	0.313676	0.255402	0.244095		-	Yes	-	64.2357	60.4439	63.1862	0.416773	0.421787	0.366084
TraesCS1A02G261400		chr1A	455818471	455822929		-	Yes	-	23.7644	20.0592	22.9777	0.670796	0.572588	0.703368		Yes	-	-	8.31734	7.51928	8.562	0.551745	0.522701	0.633001
TraesCS1A02G261500		chr1A	456231388	456232538		-	-	-	-	-	-	-	-	-		Yes	-	-	0.752622	0.82887	1.05463	1.12729	1.18385	1.287
TraesCS1A02G261800		chr1A	456321204	456323812		Yes	Yes	Yes	2.88454	3.17022	2.87049	0.78905	0.58591	0.682773		Yes	-	-	0.965601	0.907343	0.905308	1.76122	1.24668	1.1045
TraesCS1A02G261900		chr1A	456650948	456652182		-	Yes	-	11.9674	13.4813	11.8644	0.938977	0.716434	0.698349		-	Yes	-	11.8917	13.2635	12.4913	0.650126	0.586997	0.574233
TraesCS1A02G262000		chr1A	456653631	456654382		-	Yes	-	6.35347	7.16024	6.35524	0.937878	0.739118	0.801103		-	Yes	-	10.4672	10.8253	10.0411	0.621644	0.644624	0.682477
TraesCS1A02G262100		chr1A	456655323	456657426		Yes	Yes	Yes	12.3162	12.3854	11.9903	0.449706	0.552544	0.513191		-	-	-	-	-	-	-	-	-
TraesCS1A02G262200		chr1A	456924749	456931844		-	-	-	11.4841	12.282	12.9154	0.386734	0.379898	0.330692		Yes	Yes	Yes	14.3825	14.5708	14.5304	0.51981	0.470051	0.42686
TraesCS1A02G262400		chr1A	457372180	457373172		-	Yes	-	9.74987	8.76092	9.39915	0.599137	0.525676	0.48504		Yes	Yes	Yes	20.0758	23.9311	27.5379	0.682933	0.581948	0.595525
TraesCS1A02G262500		chr1A	457945325	457945945		-	Yes	-	11.2354	11.7386	10.7646	0.794273	0.787333	0.635603		Yes	Yes	Yes	29.5291	33.8778	35.224	0.80961	0.710469	0.749045
TraesCS1A02G262600		chr1A	457956311	457961244		Yes	Yes	Yes	7.01775	6.30386	6.45628	0.811386	0.484487	0.52781		-	-	-	10.554	9.11663	10.6833	0.462315	0.447678	0.363553
TraesCS1A02G262800		chr1A	458227680	458230027		Yes	-	-	20.5581	19.1948	18.6364	0.308269	0.315041	0.314996		Yes	Yes	Yes	32.9512	34.5829	35.8761	0.511441	0.495867	0.490923
TraesCS1A02G262900		chr1A	458394134	458397267		-	Yes	-	4.34335	5.52184	5.16238	0.918419	0.681718	0.70748		-	-	-	-	-	-	-	-	-
TraesCS1A02G263000		chr1A	458504528	458507240		Yes	Yes	Yes	21.3214	19.6703	19.0333	0.359821	0.382043	0.377846		-	Yes	-	1.90774	2.0759	2.02974	0.877601	0.841593	0.73714
TraesCS1A02G263200		chr1A	458557065	458562511		-	-	-	8.16251	8.88383	9.67673	0.391834	0.350317	0.359381		Yes	Yes	Yes	5.70277	5.69167	5.44184	0.625164	0.777832	0.646148
TraesCS1A02G263400		chr1A	458896289	458908694		Yes	-	-	1.96595	2.27533	2.68257	0.915402	0.815621	0.697225		-	Yes	-	1.86653	1.79797	1.76025	0.908277	1.07171	0.906145
TraesCS1A02G263700	TaNAC48-A1	chr1A	459186662	459188632		Yes	Yes	Yes	15.863	15.9819	14.6955	0.685322	0.803579	0.812976		Yes	Yes	Yes	27.5152	23.4531	15.8147	0.47046	0.482858	0.568206
TraesCS1A02G263800		chr1A	459269857	459275619		Yes	-	-	2.04975	2.06642	1.97987	0.845665	0.715167	0.870325		-	-	-	1.83693	1.47968	1.63637	0.91498	1.04941	0.937788
TraesCS1A02G263900		chr1A	459300719	459303051		-	-	-	-	0.556199	-	-	2.03254	-		Yes	Yes	Yes	3.11944	3.67478	3.96123	0.859294	0.835082	0.739213
TraesCS1A02G264000		chr1A	459307640	459313757		Yes	Yes	Yes	17.8267	20.1895	21.3855	0.979727	0.719288	0.697543		Yes	-	-	28.0897	28.4887	26.9166	0.412663	0.40297	0.387664
TraesCS1A02G264100		chr1A	459514099	459523796		-	Yes	-	6.85264	6.89327	7.34331	0.421322	0.3738	0.369591		-	Yes	-	7.73441	7.43405	7.44185	0.627013	0.736846	0.563258
TraesCS1A02G264200		chr1A	459524187	459527766		Yes	-	-	1.21837	1.31369	1.39512	0.731061	0.787871	0.939213		Yes	-	-	0.990049	1.12408	1.23194	1.04784	1.18473	0.934394
TraesCS1A02G264300		chr1A	459946840	459948904		-	-	-	1.0853	1.03483	1.26916	0.855977	0.78405	0.91765		Yes	-	-	1.3758	1.23293	1.17312	1.21723	1.13485	0.999069
TraesCS1A02G264400		chr1A	459948922	459951051		Yes	-	-	1.84459	1.48655	1.53914	1.10615	0.929005	1.24742		-	Yes	-	4.82073	4.85099	4.78682	0.633365	0.686997	0.550618
TraesCS1A02G264500		chr1A	460280712	460282491		Yes	Yes	Yes	4.28588	4.00106	3.44491	0.668735	0.637767	0.793478		Yes	Yes	Yes	2.05403	2.10058	2.99985	0.874305	0.938458	0.844563
TraesCS1A02G264700		chr1A	460330401	460334595		-	-	-	8.44357	8.47168	9.25127	0.474866	0.442377	0.44412		Yes	Yes	Yes	5.3245	5.33367	5.91428	0.699735	0.540126	0.484316
TraesCS1A02G264900		chr1A	460639089	460641864		-	-	-	0.942765	0.751327	1.03871	1.29817	1.12688	1.31704		-	Yes	-	2.49554	2.6995	1.95489	0.834092	0.785125	0.926619
TraesCS1A02G265000		chr1A	460669777	460676972		Yes	-	-	4.59285	5.46213	5.34968	0.5356	0.423471	0.552535		Yes	Yes	Yes	7.53646	7.16974	6.29169	0.462243	0.480892	0.435396
TraesCS1A02G265200		chr1A	460860063	460863294		-	Yes	-	6.43464	6.13816	6.61503	0.754262	0.570765	0.55035		-	-	-	-	-	0.629236	-	-	2.23975
TraesCS1A02G265300		chr1A	460967358	460968123		-	Yes	-	47.7298	50.1633	43.0142	0.905236	0.543965	0.687246		Yes	Yes	Yes	2.22131	2.22362	3.18286	1.30881	1.02297	2.22182
TraesCS1A02G265500		chr1A	461047826	461048232		-	Yes	-	12.569	12.0558	9.24367	1.03415	0.700904	0.775028		Yes	Yes	Yes	27.5095	21.1303	18.4688	0.692696	0.838764	0.762172
TraesCS1A02G265600		chr1A	461337578	461338417		Yes	Yes	Yes	333.729	355.141	332.695	0.533794	0.556441	0.45501		-	Yes	-	1841.93	1988.81	1595.58	0.429543	0.470983	0.429318
TraesCS1A02G265700		chr1A	461351279	461352000		-	Yes	-	31.9466	36.398	30.6284	1.13139	1.34924	1.05894		-	Yes	-	850.45	926.723	735.589	0.544473	0.558931	0.562602
TraesCS1A02G265800		chr1A	461356735	461357498		Yes	Yes	Yes	86.513	98.5388	115.869	1.05622	0.72241	0.732396		-	Yes	-	1264.47	1384.43	1148.3	0.498325	0.554299	0.624235
TraesCS1A02G265900		chr1A	461372711	461373455		-	Yes	-	36.7694	38.4066	36.0921	0.685658	0.703756	0.735057		Yes	Yes	Yes	386.853	382.98	297.128	0.625441	0.627777	0.564357
TraesCS1A02G266000		chr1A	461521743	461524132		-	Yes	-	125.074	126.58	118.222	0.942802	0.698016	0.73702		Yes	Yes	Yes	43.1063	43.138	40.0001	0.622209	0.667946	0.688109
TraesCS1A02G266100		chr1A	461641601	461644055		-	Yes	-	3.65338	3.7691	2.84264	1.8611	1.25682	1.29619		Yes	Yes	Yes	25.1988	27.496	36.5491	0.586687	0.579339	0.574043
TraesCS1A02G266500		chr1A	461995982	462000591		Yes	Yes	Yes	3.9992	4.48929	4.7712	0.478182	0.530422	0.44419		-	Yes	-	4.34951	4.036	4.81322	0.592296	0.746226	0.642931
TraesCS1A02G266600		chr1A	462000812	462006133		-	-	-	13.5678	14.1592	13.5544	0.429073	0.358614	0.334981		-	Yes	-	33.9913	30.7617	30.8625	0.417733	0.471226	0.411016
TraesCS1A02G266700		chr1A	462122731	462124931		-	-	-	0.447738	0.656366	0.607437	1.23418	1.13362	1.14442		Yes	Yes	Yes	1.87218	1.72831	1.42802	1.10288	0.955796	1.016
TraesCS1A02G266900		chr1A	462333927	462336501		-	Yes	-	11.7405	11.5651	11.4451	0.625289	0.552829	0.610358		Yes	Yes	Yes	10.9577	11.3135	9.53382	0.691273	1.07766	0.632762
TraesCS1A02G267300		chr1A	462435597	462438015		-	Yes	-	4.85075	4.30113	4.94391	0.608467	0.686902	0.616447		-	Yes	-	10.8973	9.80523	10.7477	0.5407	0.508287	0.519045
TraesCS1A02G267600		chr1A	462617029	462619649		Yes	-	-	1.35072	1.41739	1.31004	1.06912	0.86524	1.03172		-	-	-	-	-	-	-	-	-
TraesCS1A02G267800		chr1A	462776185	462778584		-	-	-	1.62638	1.77413	1.78283	1.09292	0.959521	0.9153		Yes	-	-	2.11446	2.18454	1.67291	0.92436	0.949534	0.852084
TraesCS1A02G267900		chr1A	462793392	462799930		-	-	-	10.6015	10.4346	10.3505	0.507376	0.409475	0.381078		Yes	Yes	Yes	4.17173	3.79981	3.94069	1.0273	1.03164	1.26913
TraesCS1A02G268200		chr1A	463155411	463156061		-	Yes	-	5.76552	7.21316	6.95658	0.817913	0.761381	0.724858		-	Yes	-	1.61603	2.16818	2.13522	1.13618	1.01549	1.08271
TraesCS1A02G268400		chr1A	463246853	463248232		-	Yes	-	5.88134	5.55103	5.61814	0.906084	0.850516	0.771807		Yes	Yes	Yes	16.0077	16.041	22.671	0.845425	0.697291	0.648473
TraesCS1A02G268500		chr1A	463288263	463291701		Yes	-	-	11.4771	12.6343	11.1791	0.593409	0.511574	0.492945		Yes	Yes	Yes	14.6725	13.8459	19.3473	0.588371	0.637109	0.546055
TraesCS1A02G268600		chr1A	463356638	463358483		Yes	Yes	Yes	12.1791	11.7918	11.6406	0.456076	0.399286	0.411132		-	-	-	-	-	-	-	-	-
TraesCS1A02G268700		chr1A	463400234	463403089		-	Yes	-	3.30872	3.92213	3.79744	0.884675	0.635926	0.664061		Yes	Yes	Yes	4.83077	4.98607	5.72788	0.895348	0.730826	0.583022
TraesCS1A02G268800		chr1A	463460248	463461876		-	-	-	2.4515	2.84571	2.37148	0.753599	0.717915	0.722713		Yes	Yes	Yes	5.01872	5.37688	5.82288	0.687715	0.69184	0.570099
TraesCS1A02G269000		chr1A	463810370	463813906		Yes	Yes	Yes	3.0223	3.24638	3.90732	0.892384	0.762513	0.793051		Yes	Yes	Yes	2.54985	2.85583	3.78631	0.958759	0.705389	0.65108
TraesCS1A02G269100		chr1A	463820155	463827474		-	-	-	16.9053	15.8519	16.6025	0.391046	0.419755	0.478951		-	Yes	-	25.0305	21.0986	22.8441	0.541956	0.524409	0.44716
TraesCS1A02G269200		chr1A	463827548	463830330		-	-	-	20.8118	21.8969	22.3875	0.297464	0.270733	0.264093		-	Yes	-	2.22763	1.9049	2.42375	0.894312	0.86987	0.703198
TraesCS1A02G269400		chr1A	463923731	463928925		Yes	-	-	3.12523	2.82962	2.69169	0.849414	0.743006	0.815664		-	Yes	-	2.11217	2.69258	2.48924	1.27755	1.18378	1.17682
TraesCS1A02G269500		chr1A	463929756	463932776		Yes	-	-	12.8682	12.5866	11.7783	0.506636	0.441133	0.521079		Yes	-	-	24.2757	21.9953	22.458	0.40762	0.327026	0.352229
TraesCS1A02G269600		chr1A	463958197	463963550		Yes	Yes	Yes	7.55577	6.86664	6.64349	0.552688	0.478176	0.623693		Yes	Yes	Yes	6.22303	6.60167	7.43501	0.600429	0.572112	0.568531
TraesCS1A02G270000		chr1A	464087220	464089077		-	Yes	-	3.28293	3.72346	3.08437	1.10353	1.00398	1.05607		-	-	-	-	-	-	-	-	-
TraesCS1A02G270200		chr1A	464247356	464249467		Yes	-	-	7.03378	6.70202	7.24372	0.528107	0.384745	0.464557		-	-	-	4.55516	4.16014	4.72084	0.570346	0.736693	0.579145
TraesCS1A02G270500		chr1A	464794579	464796552		Yes	-	-	9.30354	9.3655	10.7258	0.455403	0.468452	0.428801		Yes	Yes	Yes	16.9439	17.5397	18.0133	0.397766	0.410067	0.380687
TraesCS1A02G270600		chr1A	464797147	464805227		-	-	-	30.4101	31.0341	30.2785	0.299176	0.25571	0.255629		Yes	Yes	Yes	18.873	17.6205	18.6107	0.503029	0.504239	0.456603
TraesCS1A02G270700		chr1A	464809426	464811387		-	-	-	146.269	144.193	153.681	0.292877	0.274456	0.273316		-	Yes	-	172.549	172.075	158.273	0.402297	0.412531	0.457793
TraesCS1A02G270800		chr1A	464837012	464840398		Yes	-	-	8.16519	7.6489	9.31731	1.23548	1.00931	0.971968		-	-	-	2.32457	2.2649	2.2694	1.0122	1.13369	1.06299
TraesCS1A02G270900		chr1A	464901178	464908479		Yes	Yes	Yes	13.5906	9.98925	10.1939	1.46371	1.29117	1.27277		-	-	-	0.800762	0.895596	1.01046	1.56301	1.65624	1.9783
TraesCS1A02G271000		chr1A	464911387	464912944		Yes	Yes	Yes	2.02055	1.74507	1.83937	1.25371	1.19043	1.52879		Yes	-	-	1.17028	0.603722	0.365691	1.69553	1.8357	1.72026
TraesCS1A02G271700		chr1A	465281934	465283274		Yes	Yes	Yes	15.9267	15.1902	14.8544	0.468404	0.456467	0.525698		-	Yes	-	22.1705	26.0361	26.0442	0.575937	0.525946	0.565389
TraesCS1A02G272000		chr1A	465340924	465343552		-	Yes	-	16.3762	17.5959	14.6444	0.756935	0.597906	0.6611		Yes	Yes	Yes	2.01232	2.79367	3.06048	0.928909	1.00475	0.82074
TraesCS1A02G272100		chr1A	465451853	465455447		-	Yes	-	3.48949	3.84157	3.72498	0.760394	0.6153	0.667648		Yes	Yes	Yes	4.54988	5.62705	5.78892	0.651451	0.568194	0.506466
TraesCS1A02G272200		chr1A	465464900	465470830		Yes	-	-	6.85813	6.56277	6.7775	0.371774	0.482115	0.457635		Yes	-	-	15.3632	17.0465	16.414	0.386715	0.311361	0.377852
TraesCS1A02G272300		chr1A	465495668	465497672		-	-	-	0.789423	0.644225	0.601678	1.68036	1.6739	1.76569		Yes	Yes	Yes	15.8293	17.0686	17.0742	0.50266	0.458727	0.467269
TraesCS1A02G272400		chr1A	465501523	465505875		-	-	-	12.7427	13.1761	14.0031	0.391176	0.375169	0.361143		Yes	Yes	Yes	14.4224	14.2405	15.5799	0.505777	0.464041	0.476577
TraesCS1A02G273200		chr1A	467156434	467160032		-	-	-	-	-	-	-	-	-		Yes	Yes	Yes	2.09395	2.13365	3.24714	1.01328	1.00433	0.864903
TraesCS1A02G273400		chr1A	467181438	467183931		Yes	-	-	13.1272	14.858	16.2775	0.392898	0.398175	0.425538		Yes	Yes	Yes	9.97717	11.4754	13.8442	0.507136	0.490199	0.394758
TraesCS1A02G273500		chr1A	467184518	467186314		Yes	-	-	18.0269	18.303	18.0419	0.472439	0.384228	0.470143		Yes	-	-	163.488	178.691	243.927	0.380717	0.324993	0.342526
TraesCS1A02G273800		chr1A	467255799	467257827		-	-	-	0.551069	0.379641	0.51736	2.59449	1.96327	2.45001		Yes	-	-	1.43631	1.09394	1.04381	1.4063	1.42757	1.1226
TraesCS1A02G273900		chr1A	467257745	467260124		-	Yes	-	20.5039	19.184	21.1743	0.710909	0.529545	0.474999		Yes	Yes	Yes	17.4265	14.3208	14.0343	0.528491	0.558394	0.629323
TraesCS1A02G274300		chr1A	468598785	468599195		Yes	Yes	Yes	4.85554	5.34667	5.09746	1.24356	0.877468	0.81647		-	Yes	-	10.2996	10.6417	10.6403	0.817291	0.710345	0.819685
TraesCS1A02G274500		chr1A	468684277	468685156		-	-	-	-	-	-	-	-	-		Yes	Yes	Yes	1.84909	2.22037	3.08252	1.66107	1.03777	0.735361
TraesCS1A02G274800		chr1A	468847622	468849139		Yes	Yes	Yes	4.035	3.63741	3.64174	0.731541	0.596225	0.609532		-	Yes	-	5.18205	4.2174	5.16688	0.596052	0.654878	0.605963
TraesCS1A02G275200		chr1A	469369455	469371619		-	-	-	173.031	166.449	164.863	0.362037	0.347708	0.353623		Yes	Yes	Yes	267.841	252.849	229.065	0.437339	0.437111	0.464822
TraesCS1A02G275300		chr1A	469374580	469377056		Yes	-	-	6.99666	7.72035	7.60821	0.399491	0.387088	0.436095		Yes	Yes	Yes	6.89305	7.9422	7.86429	0.534125	0.521237	0.460392
TraesCS1A02G275400		chr1A	469587133	469593624		Yes	-	-	5.65051	6.45203	5.80643	0.52742	0.492163	0.479397		-	Yes	-	18.435	16.6669	19.4945	0.643539	0.66618	0.603543
TraesCS1A02G275800		chr1A	470685586	470686825		-	-	-	0.641199	0.74508	0.525784	1.56536	1.62001	1.7019		Yes	Yes	Yes	2.03146	1.61215	1.48096	1.02348	1.246	0.974322
TraesCS1A02G276200		chr1A	471480702	471483149		Yes	Yes	Yes	4.28099	4.2094	3.70255	0.679384	0.747882	0.772219		Yes	Yes	Yes	17.0113	18.1698	17.5425	0.616078	0.515872	0.452379
TraesCS1A02G276300		chr1A	471488205	471489387		Yes	-	-	7.50645	7.31044	8.70077	0.482387	0.507384	0.498741		Yes	Yes	Yes	57.2936	62.1514	69.7202	0.559755	0.529846	0.548214
TraesCS1A02G276400		chr1A	471489979	471494342		-	-	-	6.61119	6.97701	7.30591	0.316262	0.345765	0.341517		Yes	Yes	Yes	8.63659	8.45481	8.60642	0.558426	0.455222	0.420594
TraesCS1A02G276500		chr1A	471503708	471507782		Yes	Yes	Yes	6.5334	6.94165	7.6066	0.648462	0.497294	0.539338		-	Yes	-	6.55203	5.82988	6.6639	0.498634	0.554914	0.483186
TraesCS1A02G276600		chr1A	471695008	471701095		-	-	-	0.456418	0.492821	0.504414	1.74058	1.19313	1.374		Yes	Yes	Yes	10.0779	7.131	6.21325	0.918105	0.986847	0.751811
TraesCS1A02G276800		chr1A	471728744	471730911		Yes	-	-	6.24595	6.15323	5.29248	0.651818	0.617095	0.733651		Yes	Yes	Yes	119.039	119.011	124.793	0.467912	0.478356	0.490848
TraesCS1A02G277000		chr1A	472140797	472143555		Yes	-	-	7.88302	8.01653	7.66824	0.463146	0.367984	0.462061		-	Yes	-	2.98667	3.0553	3.08625	0.769708	0.836521	0.668358
TraesCS1A02G277100		chr1A	472164399	472169481		Yes	Yes	Yes	5.09252	4.69984	4.46701	0.695295	0.644432	0.700107		-	-	-	-	-	-	-	-	-
TraesCS1A02G277400		chr1A	472550277	472552563		-	Yes	-	13.5595	14.0698	11.8212	0.890156	0.803271	0.791278		-	Yes	-	7.42231	6.74684	6.85706	0.774787	0.712177	0.630852
TraesCS1A02G277500		chr1A	473009758	473011782		Yes	-	-	188.898	202.506	210.758	0.380831	0.324979	0.315544		Yes	Yes	Yes	150.207	162.605	186.306	0.359029	0.355613	0.330137
TraesCS1A02G277700		chr1A	473037523	473042364		-	Yes	-	1.82751	2.20054	2.21186	0.861855	0.792425	0.78746		Yes	-	-	1.23109	1.16303	1.2817	1.42292	1.15861	1.02185
TraesCS1A02G278000		chr1A	473630543	473641488		Yes	-	-	5.30078	6.00808	6.86537	0.587231	0.551194	0.492228		Yes	Yes	Yes	1.36252	0.965338	1.27302	1.26523	1.2447	1.18845
TraesCS1A02G278200		chr1A	474197441	474201439		Yes	-	-	9.04898	9.90421	11.5045	0.361138	0.370244	0.377872		Yes	Yes	Yes	2.36641	2.63932	3.2478	0.821417	0.843438	0.73574
TraesCS1A02G278300		chr1A	474217694	474220455		Yes	Yes	Yes	2.74535	2.95799	2.39493	0.71544	0.704869	0.70099		Yes	Yes	Yes	3.8085	3.8409	3.93938	0.822848	0.632102	0.661269
TraesCS1A02G278600		chr1A	474291361	474293659		Yes	Yes	Yes	34.9033	32.5496	36.8611	0.508514	0.481736	0.639047		-	Yes	-	7.22544	8.07011	7.26594	0.745259	1.06772	0.583699
TraesCS1A02G278800		chr1A	474430833	474432419		Yes	Yes	Yes	21.5343	15.0292	14.6967	1.27299	0.976021	0.933867		Yes	Yes	Yes	2.11742	1.71192	1.57616	1.42626	1.38369	1.59012
TraesCS1A02G278900		chr1A	474449755	474451774		Yes	Yes	Yes	2.87187	2.7074	2.9579	0.905538	0.828038	0.845929		Yes	-	-	1.17683	1.05907	0.94528	1.28881	1.18317	1.15031
TraesCS1A02G279000		chr1A	474640545	474644247		-	Yes	-	10.4178	9.16323	9.93649	0.611454	0.500456	0.528731		Yes	Yes	Yes	2.91686	2.98074	3.38448	0.782462	0.636836	0.726818
TraesCS1A02G279200		chr1A	474791494	474793789		-	-	-	0.694716	0.935413	0.828137	1.06328	1.05505	0.939163		Yes	-	-	1.13591	1.35589	1.18991	1.11242	1.21813	0.95595
TraesCS1A02G279300		chr1A	475309490	475313192		Yes	-	-	3.59084	3.45838	3.22128	0.673763	0.485723	0.587541		Yes	-	-	15.4495	16.9427	18.9955	0.520973	0.511257	0.383598
TraesCS1A02G279500		chr1A	476908622	476911179		-	-	-	28.6384	29.2117	31.39	0.380726	0.364984	0.374851		Yes	-	-	0.968315	1.15754	1.39101	0.939879	1.22969	1.20837
TraesCS1A02G279800		chr1A	477014828	477019580		Yes	Yes	Yes	7.85689	6.3435	6.13551	0.760366	0.555273	0.627714		Yes	Yes	Yes	11.6501	10.5189	9.09588	0.688103	0.703366	0.601287
TraesCS1A02G280300		chr1A	477730922	477734715		Yes	Yes	Yes	2.81531	3.08824	3.52496	0.888898	0.635995	0.774488		-	Yes	-	3.66795	3.79688	3.60264	0.836186	0.740503	0.751609
TraesCS1A02G280400		chr1A	477735712	477739169		-	Yes	-	7.84624	7.21337	7.41744	0.642662	0.62073	0.533297		Yes	Yes	Yes	21.9967	20.4624	19.1132	0.607002	0.594399	0.534871
TraesCS1A02G280500		chr1A	478256374	478258875		Yes	-	-	16.0514	16.4195	17.8249	0.4976	0.419633	0.429279		Yes	Yes	Yes	53.4955	58.3978	80.8166	0.615607	0.690452	0.630674
TraesCS1A02G280600		chr1A	478350773	478355542		-	-	-	41.3267	37.192	40.5924	1.1257	0.634703	0.578683		-	Yes	-	8.98556	8.84363	9.65105	0.724382	0.731539	0.720395
TraesCS1A02G280700		chr1A	478450779	478452828		-	Yes	-	9.50801	10.711	9.95122	0.682325	0.525089	0.570792		Yes	Yes	Yes	95.8077	104.035	106.374	0.3522	0.394289	0.413461
TraesCS1A02G280800		chr1A	478535519	478538442		-	-	-	1.3257	1.39669	1.47675	0.902997	0.831124	0.887723		Yes	-	-	1.47956	1.57467	1.84414	0.80495	0.91537	0.85797
TraesCS1A02G280900		chr1A	478566906	478570715		-	-	-	2.20219	2.88582	2.45365	0.780044	0.711193	0.742648		Yes	-	-	0.985167	1.12821	1.0825	1.46345	1.2518	1.19515
TraesCS1A02G281000		chr1A	478625937	478628984		Yes	Yes	Yes	111.276	99.4466	97.4517	0.883084	0.815366	0.758639		Yes	Yes	Yes	545.361	478.616	438.083	0.385502	0.39719	0.405067
TraesCS1A02G281100		chr1A	479540489	479545436		-	-	-	5.75359	5.46938	6.27049	0.486963	0.443664	0.479854		Yes	Yes	Yes	6.94285	6.90425	7.03553	0.620886	0.742531	0.606835
TraesCS1A02G281200		chr1A	479711767	479713481		Yes	Yes	Yes	1.95936	2.34372	2.79994	0.999474	0.829055	0.806323		Yes	-	-	1.22569	1.08928	1.4439	0.986947	0.942005	0.943155
TraesCS1A02G281300		chr1A	479817767	479820086		Yes	-	-	25.5021	27.6623	25.8982	0.325525	0.323741	0.295521		Yes	Yes	Yes	57.6937	60.7484	61.6569	0.328635	0.378748	0.310862
TraesCS1A02G281400		chr1A	479827961	479840208		Yes	Yes	Yes	13.0708	13.6346	18.895	0.489107	0.468601	0.585578		Yes	Yes	Yes	11.7606	11.3029	15.6885	0.639923	0.71835	0.495295
TraesCS1A02G281700		chr1A	480429132	480432551		Yes	-	-	14.0048	13.7287	12.6944	0.405604	0.409296	0.4231		-	-	-	0.890067	0.558644	0.765512	1.40959	1.02591	1.24944
TraesCS1A02G281800		chr1A	480546650	480549947		-	-	-	16.8197	17.5193	18.25	0.308655	0.276487	0.295055		-	Yes	-	28.5439	26.0747	25.9118	0.442456	0.437199	0.485147
TraesCS1A02G282000		chr1A	480571080	480574092		Yes	-	-	3.95395	3.94754	4.20103	0.546025	0.42229	0.534623		Yes	-	-	1.55993	1.64512	1.61002	0.932132	0.98548	0.92166
TraesCS1A02G282200		chr1A	480592131	480593673		-	-	-	-	-	-	-	-	-		Yes	Yes	Yes	2.8832	2.39022	2.8082	1.81661	1.7408	1.69437
TraesCS1A02G282300		chr1A	480595190	480598675		Yes	-	-	1.55742	1.13602	1.14902	1.13577	0.985494	1.32779		-	-	-	6.25097	5.80148	6.67474	0.827896	0.917793	0.84281
TraesCS1A02G282400		chr1A	480599130	480602337		-	Yes	-	0.796394	0.971311	1.77823	1.41209	1.4469	1.29841		-	Yes	-	2.27867	2.00786	4.69427	1.22374	1.28865	1.04754
TraesCS1A02G282600		chr1A	480604085	480605860		-	Yes	-	51.3312	51.3594	47.8141	0.777088	0.725129	0.776974		Yes	Yes	Yes	3.80163	4.16708	4.20639	0.978122	0.933719	0.839859
TraesCS1A02G282800		chr1A	480750172	480750864		-	Yes	-	2.1573	2.13614	1.8023	0.691767	0.763295	0.82195		Yes	Yes	Yes	37.8563	33.1918	23.8612	0.471068	0.400368	0.54239
TraesCS1A02G283000		chr1A	480755306	480759476		Yes	-	-	4.92796	5.33247	6.62867	0.525701	0.545704	0.555072		-	Yes	-	2.90108	3.30483	3.45456	0.887314	0.728718	0.718159
TraesCS1A02G283100		chr1A	480808720	480811836		Yes	Yes	Yes	8.35462	7.20833	7.31464	0.854955	0.739758	0.886975		-	Yes	-	2.97398	2.94648	2.25364	0.958234	0.712788	0.847248
TraesCS1A02G283400		chr1A	480933518	480936043		-	-	-	0.384404	0.47561	-	1.72233	1.67432	-		Yes	Yes	Yes	2.11117	1.75738	1.84858	0.932009	0.917693	1.346
TraesCS1A02G283600		chr1A	481289053	481292772		Yes	Yes	Yes	2.07867	2.51587	2.56246	1.00446	0.736314	0.818845		-	-	-	-	-	-	-	-	-
TraesCS1A02G283700		chr1A	481627861	481631319		Yes	-	-	1.12921	1.26094	1.60573	0.901294	1.07617	1.26615		Yes	Yes	Yes	1.41788	1.75379	1.67102	0.960924	1.09907	0.965029
TraesCS1A02G283900		chr1A	481673552	481675855		-	Yes	-	2.32291	2.44239	1.83405	0.915997	0.745351	0.820127		Yes	-	-	1.50038	1.29146	0.708143	1.16801	1.17809	1.34753
TraesCS1A02G284000		chr1A	481690847	481703225		Yes	-	-	7.26843	6.70895	6.91751	0.602292	0.454384	0.453256		Yes	Yes	Yes	14.4868	12.6118	12.5705	0.578417	0.547039	0.609368
TraesCS1A02G284300		chr1A	481880422	481884082		-	Yes	-	3.51811	3.86984	3.76138	0.816408	0.707047	0.70741		Yes	Yes	Yes	2.01958	2.37716	2.6267	0.780951	0.866604	0.919019
TraesCS1A02G284400		chr1A	481921987	481930381		-	-	-	1.1077	1.09914	1.28966	1.23007	0.906548	0.87454		Yes	-	-	1.08261	0.818747	1.09321	1.27435	1.22249	1.29415
TraesCS1A02G284500		chr1A	481932929	481934524		Yes	-	-	1.07534	1.34766	1.40274	1.21252	0.720593	0.891526		-	-	-	0.319078	0.431473	-	1.87871	1.99107	-
TraesCS1A02G284800		chr1A	482277206	482278965		Yes	Yes	Yes	89.2871	95.9418	99.6993	0.431459	0.40039	0.391838		Yes	Yes	Yes	89.1015	98.5446	116.955	0.313817	0.308275	0.316407
TraesCS1A02G284900		chr1A	482328444	482329898		Yes	-	-	23.5703	24.9662	25.9082	0.475604	0.548861	0.482551		Yes	Yes	Yes	25.2473	17.3423	14.0202	0.540893	0.442144	0.493541
TraesCS1A02G285000		chr1A	482335686	482339114		-	-	-	3.05116	3.67959	3.50181	1.03173	1.01085	1.25289		-	Yes	-	3.07416	2.61832	3.02117	1.14279	1.4403	0.888838
TraesCS1A02G285400		chr1A	482767938	482771537		Yes	Yes	Yes	4.86948	4.96206	4.75387	0.538107	0.578957	0.682934		-	-	-	-	-	-	-	-	-
TraesCS1A02G285500		chr1A	482777474	482780309		-	-	-	0.932251	0.784702	1.13849	1.32324	1.1795	1.07482		Yes	-	-	1.18694	1.17929	1.19697	1.19075	1.11468	0.838025
TraesCS1A02G285600		chr1A	482780626	482783275		Yes	-	-	9.19081	9.80463	10.0897	0.463979	0.390233	0.361315		Yes	-	-	1.30671	1.36127	1.43134	1.04712	1.10675	0.861304
TraesCS1A02G285900		chr1A	482963667	482964392		-	-	-	0.409074	0.527006	0.5538	2.17537	2.08192	1.94701		-	Yes	-	1.70298	1.40811	1.21949	1.94046	1.86664	1.56017
TraesCS1A02G286300		chr1A	483033163	483035128		-	Yes	-	75.1696	78.8982	76.6437	0.503065	0.408239	0.450429		Yes	Yes	Yes	92.902	98.9154	105.573	0.436715	0.468438	0.38849
TraesCS1A02G286500		chr1A	483195165	483197070		-	Yes	-	2.54631	2.30388	2.61091	0.877497	0.624527	0.857867		-	-	-	0.334379	0.355118	0.531982	1.48612	1.90367	1.41663
TraesCS1A02G286900		chr1A	483678247	483679340		-	-	-	72.1806	74.7486	77.5375	0.25973	0.24488	0.275541		-	Yes	-	56.9887	60.388	56.1202	0.37242	0.358486	0.357926
TraesCS1A02G287000		chr1A	483861632	483862357		Yes	Yes	Yes	22.5214	24.6526	27.137	0.775533	0.758809	0.720712		Yes	Yes	Yes	2.30255	3.14582	3.39396	1.42624	1.09765	0.899588
TraesCS1A02G287200		chr1A	483928064	483928857		Yes	-	-	1.63832	1.81621	2.1232	1.14832	1.01902	0.963904		-	-	-	-	-	-	-	-	-
TraesCS1A02G287400		chr1A	484328735	484337743		-	-	-	36.403	35.4334	36.5004	0.303628	0.265607	0.328669		-	Yes	-	74.3009	68.2608	63.3867	0.435932	0.414142	0.380068
TraesCS1A02G287500		chr1A	484998886	485000259		Yes	-	-	6.57015	6.06504	6.15445	0.536785	0.481625	0.557437		Yes	Yes	Yes	6.75213	7.09601	8.73838	0.51529	0.433885	0.448388
TraesCS1A02G287600		chr1A	485002247	485010324		-	Yes	-	9.49761	8.53705	10.2837	0.563329	0.452181	0.551711		-	Yes	-	11.1087	9.18395	9.99774	0.773209	0.720026	0.665255
TraesCS1A02G287700		chr1A	485010538	485011160		-	Yes	-	9.93562	11.0458	9.58077	1.02123	0.787078	0.700173		-	Yes	-	16.5526	18.4249	13.2654	0.673745	0.576593	0.664557
TraesCS1A02G287800		chr1A	485012383	485012973		-	Yes	-	24.3592	25.5345	22.368	0.965511	0.639825	0.672684		-	Yes	-	44.2216	46.9842	41.8293	0.515492	0.522728	0.591277
TraesCS1A02G288400		chr1A	485353187	485357741		-	-	-	18.6676	19.9225	21.1049	0.349566	0.276114	0.261578		-	Yes	-	20.9258	20.4162	21.1942	0.412379	0.482438	0.425504
TraesCS1A02G288500		chr1A	485359631	485363435		Yes	-	-	9.09754	8.75879	11.1722	0.532697	0.380336	0.514846		Yes	-	-	10.1457	10.1668	11.2253	0.534787	0.528523	0.429816
TraesCS1A02G288600		chr1A	485557978	485566303		-	-	-	13.5845	14.161	15.5825	0.360604	0.392277	0.322943		-	Yes	-	47.2376	46.4865	40.1468	0.456135	0.484771	0.466609
TraesCS1A02G288800		chr1A	486052173	486054559		Yes	Yes	Yes	90.7413	97.5416	101.027	0.40267	0.360991	0.396916		Yes	Yes	Yes	133.843	145.889	169.023	0.298964	0.352412	0.26662
TraesCS1A02G288900		chr1A	486329614	486334243		-	-	-	6.90557	7.07815	7.17229	0.398116	0.337486	0.382374		Yes	Yes	Yes	7.64693	7.05336	7.94447	0.556366	0.558975	0.508659
TraesCS1A02G289300		chr1A	486663234	486663428		-	Yes	-	1.70558	1.86212	2.26896	1.52691	1.31508	1.3902		-	-	-	0.73261	0.346071	0.467121	1.51045	1.65622	1.65049
TraesCS1A02G289500		chr1A	486695680	486697371		-	-	-	-	-	-	-	-	-		Yes	-	-	0.643434	0.750674	0.817644	1.37524	1.23972	1.28315
TraesCS1A02G289600		chr1A	486743602	486743796		Yes	-	-	1.23056	1.50569	1.33231	1.54062	1.37858	1.33445		-	-	-	-	-	-	-	-	-
TraesCS1A02G289800		chr1A	486750894	486751073		-	Yes	-	12.6147	12.3701	12.7234	1.086	0.942532	0.918172		-	Yes	-	9.8512	8.16457	9.18032	1.05243	0.996541	0.856345
TraesCS1A02G289900		chr1A	486816908	486817108		Yes	Yes	Yes	19.1468	17.9195	17.6543	0.750476	0.635773	0.76204		-	Yes	-	5.17075	4.1752	5.12017	0.949754	0.927464	0.803946
TraesCS1A02G290100		chr1A	486896765	486897070		Yes	Yes	Yes	17.8299	15.2521	14.5607	0.857062	0.737867	0.85837		Yes	Yes	Yes	8.44564	7.70735	10.6967	0.906453	0.686895	0.865984
TraesCS1A02G290200		chr1A	486953459	486953967		Yes	Yes	Yes	6.72168	5.82174	5.56034	0.856828	0.794553	0.832684		Yes	-	-	1.92881	1.98839	1.83113	1.98294	1.09548	1.02008
TraesCS1A02G290500		chr1A	487010560	487019246		-	-	-	7.94853	7.87659	8.37646	0.479802	0.413381	0.49364		Yes	Yes	Yes	4.0603	3.79674	4.3536	0.768948	0.769985	0.674452
TraesCS1A02G290800		chr1A	487100407	487103619		-	Yes	-	2.30788	2.64985	2.23008	0.724541	0.684961	0.7798		-	-	-	-	-	-	-	-	-
TraesCS1A02G291200		chr1A	487463045	487466385		Yes	-	-	2.07338	2.20449	2.6255	0.805036	0.719804	0.69968		Yes	Yes	Yes	3.43831	3.61755	4.19875	0.796881	0.929808	0.72051
TraesCS1A02G291400		chr1A	487485917	487492936		Yes	Yes	Yes	14.0178	14.2128	16.8832	0.475125	0.409498	0.449936		-	Yes	-	9.93842	9.5476	9.06221	0.711202	0.68836	0.638026
TraesCS1A02G291500		chr1A	487568658	487569222		-	Yes	-	12.063	14.646	12.558	0.932765	0.705604	0.707456		-	Yes	-	18.1121	18.3156	14.7576	0.63997	0.592487	0.587264
TraesCS1A02G291600		chr1A	487571246	487571856		-	Yes	-	11.3986	12.419	11.1584	0.968297	0.709373	0.644581		Yes	Yes	Yes	23.6481	21.874	18.5956	0.621969	0.599839	0.626143
TraesCS1A02G291700		chr1A	487604483	487605044		-	Yes	-	10.0174	10.8142	9.20719	1.21194	0.814116	0.76832		-	Yes	-	26.5347	28.509	25.2985	0.723961	0.648293	0.830406
TraesCS1A02G292100		chr1A	487728612	487734607		Yes	-	-	7.14528	7.68722	8.03605	0.516889	0.395772	0.429136		-	Yes	-	5.2355	5.0458	5.88263	0.637044	0.653671	0.643083
TraesCS1A02G292200		chr1A	487735997	487741826		Yes	-	-	14.1706	14.6374	14.5906	0.397031	0.362549	0.342932		-	-	-	20.5666	19.597	23.0794	0.427472	0.532072	0.393812
TraesCS1A02G295200		chr1A	490306427	490313978		-	Yes	-	122.399	120.214	113.081	0.380288	0.382438	0.384045		-	Yes	-	29.8899	26.2568	29.2312	0.658255	0.680826	0.673615
TraesCS1A02G295300		chr1A	490411509	490414419		Yes	Yes	Yes	9.69376	9.26826	8.44609	0.568613	0.459067	0.723135		Yes	Yes	Yes	13.8713	14.6094	15.174	0.497382	0.389732	0.400338
TraesCS1A02G295400		chr1A	490418247	490418875		-	Yes	-	15.8999	16.6932	15.1423	0.858192	0.667559	0.672934		-	Yes	-	24.0139	25.2307	22.965	0.519417	0.506248	0.556458
TraesCS1A02G295700		chr1A	490759999	490760520		-	Yes	-	16.9538	19.0962	15.7846	1.05363	0.770778	0.712782		-	Yes	-	43.3137	44.0448	37.203	0.626084	0.54438	0.697791
TraesCS1A02G295800		chr1A	490794344	490797100		Yes	Yes	Yes	26.4867	25.544	30.4005	1.20265	1.22179	0.965843		Yes	Yes	Yes	8.54592	7.72746	8.02857	0.902142	0.865224	1.06666
TraesCS1A02G295900		chr1A	490893557	490894966		Yes	-	-	1.4895	1.06618	1.36127	0.999658	0.853536	0.809246		-	Yes	-	4.62335	3.94322	4.79426	0.824279	0.810946	0.580639
TraesCS1A02G296100		chr1A	491128110	491130587		-	-	-	4.21054	4.3064	4.75317	0.527351	0.47149	0.513683		Yes	Yes	Yes	4.79813	4.72134	4.91235	0.700565	0.689388	0.669447
TraesCS1A02G296200		chr1A	491135033	491139363		Yes	-	-	4.88195	5.17967	5.56355	0.600245	0.470077	0.48823		Yes	-	-	5.5003	5.90503	6.66239	0.783978	0.537852	0.4602
TraesCS1A02G296300		chr1A	491148418	491153457		-	-	-	8.62707	8.27436	8.20052	0.573787	0.525398	0.579786		Yes	Yes	Yes	13.7573	12.3863	13.8876	0.582374	0.584892	0.547986
TraesCS1A02G296900		chr1A	492045923	492046657		-	-	-	-	-	-	-	-	-		Yes	-	-	0.683404	0.663986	0.908897	1.56815	1.91456	1.1361
TraesCS1A02G297000		chr1A	492123583	492128662		Yes	Yes	Yes	8.30746	8.19249	9.35905	0.589831	0.456172	0.496498		-	Yes	-	9.50747	8.43965	9.29002	0.615945	0.670184	0.703317
TraesCS1A02G297400		chr1A	492271768	492273128		-	-	-	-	-	-	-	-	-		Yes	Yes	Yes	2.2493	3.08162	3.77176	0.977993	0.971256	0.824927
TraesCS1A02G297500		chr1A	492273999	492276991		Yes	-	-	1.27699	1.477	1.6841	0.892547	0.950418	0.938037		-	-	-	1.02498	1.17498	1.51793	1.3402	1.19044	1.11167
TraesCS1A02G297600		chr1A	492652071	492652999		-	-	-	-	-	0.45381	-	-	1.57003		Yes	Yes	Yes	5.63768	7.50065	8.64923	0.867095	0.705419	0.612752
TraesCS1A02G297800		chr1A	492807460	492809424		-	Yes	-	3.61298	2.9258	3.62434	0.79465	0.742842	0.778875		-	Yes	-	7.76517	6.99462	8.08819	0.722628	0.759964	0.827572
TraesCS1A02G297900		chr1A	493201602	493202834		-	-	-	17.1936	17.8941	18.2688	0.327279	0.303958	0.320368		Yes	-	-	24.4825	27.4428	28.5649	0.331978	0.334668	0.280887
TraesCS1A02G298000		chr1A	493205775	493211109		-	-	-	7.85788	7.45634	7.55279	0.419368	0.341661	0.365854		-	Yes	-	13.8362	11.7346	14.1575	0.5402	0.563388	0.576687
TraesCS1A02G298100		chr1A	493211557	493216752		Yes	Yes	Yes	13.403	12.4927	12.6126	0.559807	0.488732	0.437412		-	Yes	-	11.768	10.4119	11.0813	0.702258	0.601578	0.63212
TraesCS1A02G298600		chr1A	493500538	493503348		Yes	Yes	Yes	3.10947	2.44739	2.62755	0.774081	0.677384	0.978116		-	Yes	-	8.78421	7.16697	7.90406	1.00479	0.819142	0.726155
TraesCS1A02G298800		chr1A	493736793	493737676		Yes	Yes	Yes	5.92457	5.45943	4.95691	0.669023	0.563057	0.826011		-	-	-	-	-	-	-	-	-
TraesCS1A02G298900		chr1A	493815619	493820587		-	Yes	-	12.9645	10.8936	12.3151	0.541713	0.497421	0.654457		Yes	Yes	Yes	26.0865	23.0876	20.0961	0.671442	0.687087	0.651447
TraesCS1A02G299100		chr1A	493919421	493923356		-	-	-	35.4192	35.3761	33.0222	0.534443	0.644344	0.524059		Yes	Yes	Yes	82.9962	78.1655	60.0259	0.587059	0.483453	0.436193
TraesCS1A02G299200		chr1A	494024032	494026393		Yes	Yes	Yes	8.87137	7.46785	6.94385	0.96698	0.716525	0.71158		-	-	-	-	-	-	-	-	-
TraesCS1A02G299500		chr1A	494442747	494448514		-	Yes	-	17.202	19.3991	20.3929	0.93118	0.698248	0.700693		Yes	Yes	Yes	17.5121	18.0722	20.2351	0.466266	0.436357	0.35849
TraesCS1A02G300000		chr1A	494799446	494801844		Yes	-	-	10.0091	10.1147	10.0973	0.613796	0.647943	0.621736		-	Yes	-	22.5379	22.3731	18.9676	0.558461	0.482352	0.444516
TraesCS1A02G300200		chr1A	495191440	495193276		-	Yes	-	41.4457	47.7375	39.6437	0.800668	0.660559	0.659649		Yes	-	-	1.28937	1.57818	2.31641	1.35852	0.998956	1.0519
TraesCS1A02G300800		chr1A	495444290	495447580		-	-	-	24.4133	21.8439	24.9472	0.39472	0.292199	0.311456		-	Yes	-	28.548	26.9214	29.6059	0.441925	0.490658	0.408992
TraesCS1A02G300900		chr1A	495455275	495456610		-	-	-	0.391658	0.358624	-	1.99928	1.7993	-		-	Yes	-	2.36578	2.43157	2.13878	1.10305	1.31803	0.99367
TraesCS1A02G301100		chr1A	495578650	495580083		-	Yes	-	4.84042	5.82077	4.89189	1.16358	1.05689	1.19412		-	Yes	-	2.76	2.96927	1.95339	1.17114	0.987905	1.02791
TraesCS1A02G301400		chr1A	495699527	495703459		Yes	Yes	Yes	17.7	18.1792	19.1955	0.448087	0.361186	0.407158		-	-	-	-	-	-	-	-	-
TraesCS1A02G301600		chr1A	495706747	495708765		-	Yes	-	33.6494	28.9537	31.9029	0.483874	0.399129	0.443539		-	Yes	-	66.1543	61.0915	69.943	0.368172	0.396162	0.335149
TraesCS1A02G302100		chr1A	496088755	496090179		-	Yes	-	5.1726	5.20538	4.52776	0.756482	0.617387	0.663547		Yes	Yes	Yes	19.697	17.6903	14.5917	0.737816	0.625889	0.53852
TraesCS1A02G302600		chr1A	496303414	496312017		-	Yes	-	5.31133	5.31042	5.78341	0.614588	0.564843	0.754525		-	Yes	-	12.9688	12.5397	17.1868	0.606902	0.52226	0.568838
TraesCS1A02G302700		chr1A	496311912	496315200		Yes	-	-	0.947717	1.05368	0.966234	1.10178	0.964479	1.06313		-	-	-	1.66201	1.82282	1.72567	0.979747	0.956883	0.794416
TraesCS1A02G302800		chr1A	496439334	496443344		Yes	-	-	4.69583	4.91088	5.42009	0.487862	0.40971	0.454907		-	Yes	-	6.1365	6.36947	6.98338	0.700518	0.575535	0.535018
TraesCS1A02G302900		chr1A	496476714	496479058		-	-	-	31.2841	33.3541	34.5571	0.246438	0.226793	0.281981		-	Yes	-	36.5214	38.198	37.6046	0.38562	0.381381	0.392436
TraesCS1A02G303100		chr1A	496631342	496638807		-	-	-	0.572633	0.679406	0.474049	1.47273	1.50595	1.43661		Yes	Yes	Yes	15.0063	13.5368	12.1015	0.589517	0.539851	0.4941
TraesCS1A02G303200		chr1A	496645160	496646178		-	-	-	0.522222	0.476717	0.469511	2.29731	1.25138	1.28556		-	Yes	-	1.30834	1.11393	1.50511	1.39119	1.20826	1.01785
TraesCS1A02G303300		chr1A	497072884	497077040		Yes	-	-	17.5411	19.3441	20.123	0.460341	0.385976	0.325846		Yes	-	-	15.4508	16.7443	17.1355	0.465227	0.470497	0.372522
TraesCS1A02G303600		chr1A	497192150	497192770		Yes	Yes	Yes	1.89579	1.76433	1.21725	1.13863	1.23156	0.980629		-	Yes	-	2.79638	3.62598	3.00926	1.30701	1.05616	1.17275
TraesCS1A02G304000		chr1A	497345478	497346953		Yes	-	-	1.03725	0.983762	0.668865	1.81511	1.0637	1.65896		-	-	-	-	-	-	-	-	-
TraesCS1A02G304200		chr1A	497503763	497509507		Yes	Yes	Yes	7.12157	6.43493	5.96504	0.588556	0.611808	0.714135		-	Yes	-	59.8204	65.0279	58.0663	0.521814	0.605004	0.522896
TraesCS1A02G304300		chr1A	497511012	497514242		-	-	-	12.9481	13.0874	13.9216	0.352635	0.287114	0.306595		Yes	Yes	Yes	20.1481	21.6835	22.8406	0.355354	0.366895	0.372586
TraesCS1A02G304400		chr1A	497516473	497522797		-	-	-	5.10326	5.03641	6.04766	0.482287	0.453746	0.471765		Yes	Yes	Yes	5.21014	4.938	5.32034	0.641044	0.571806	0.615158
TraesCS1A02G304900		chr1A	497760516	497762475		Yes	Yes	Yes	8.02501	6.87403	5.46689	0.651137	0.578714	0.628581		-	Yes	-	25.5731	28.4476	26.9509	0.468705	0.467681	0.441832
TraesCS1A02G305200		chr1A	497862698	497868466		Yes	Yes	Yes	2.31047	2.30107	2.44067	0.770184	0.714991	0.770936		Yes	-	-	1.13145	0.984491	1.10556	1.22917	1.35927	1.31709
TraesCS1A02G305300		chr1A	497902190	497902938		-	Yes	-	5.35156	5.40025	5.05093	0.543597	0.562319	0.602341		-	Yes	-	11.7504	12.4582	12.5252	0.536892	0.49217	0.520776
TraesCS1A02G305400		chr1A	498047045	498047740		-	Yes	-	8.55711	7.94535	8.56769	0.589367	0.484675	0.497661		-	Yes	-	3.93282	4.69202	3.67527	0.652152	0.716231	0.639129
TraesCS1A02G305500		chr1A	498048602	498050847		Yes	Yes	Yes	4.01745	4.05683	3.44807	0.731442	0.820432	0.734697		Yes	-	-	1.15836	1.49336	1.94024	1.31568	1.3883	1.06424
TraesCS1A02G305800		chr1A	498162701	498168173		-	Yes	-	3.85466	3.70149	3.54374	0.664458	0.70945	0.645632		-	Yes	-	8.87556	7.18978	8.85497	0.821849	0.642503	0.811914
TraesCS1A02G305900		chr1A	498170029	498173213		-	-	-	3.72679	4.35353	4.41696	0.634569	0.499749	0.555169		Yes	Yes	Yes	4.2062	4.5725	4.60948	0.661679	0.693587	0.596001
TraesCS1A02G306000		chr1A	498174286	498175809		Yes	-	-	1.58366	1.82677	1.90851	0.779804	0.672526	0.782289		-	-	-	-	-	-	-	-	-
TraesCS1A02G306200		chr1A	498451494	498454124		-	Yes	-	35.9739	31.6971	37.5059	0.590197	0.560792	0.568638		-	Yes	-	53.6003	51.6844	64.7905	0.489989	0.599875	0.438188
TraesCS1A02G306300	TaFDL2-A1	chr1A	498532631	498536872		-	-	-	2.14575	2.22571	2.17782	0.692011	0.737059	0.69924		Yes	-	-	2.23594	2.07735	2.36533	1.18818	0.749037	0.770289
TraesCS1A02G306400		chr1A	498537150	498542005		-	Yes	-	5.36935	5.87921	5.63591	0.76849	0.645389	0.71145		-	Yes	-	6.39888	5.90296	6.27621	0.540983	0.608561	0.519178
TraesCS1A02G306500		chr1A	498592842	498595274		Yes	Yes	Yes	3.57216	3.89119	3.88386	0.896776	0.612542	0.565965		-	Yes	-	4.35408	4.75845	4.71607	0.67357	0.6668	0.620044
TraesCS1A02G306600		chr1A	498596555	498597648		Yes	Yes	Yes	282.796	282.76	200.763	0.674081	0.705077	0.765479		Yes	-	-	0.467271	0.782884	0.835946	1.87711	1.49272	1.71582
TraesCS1A02G307300		chr1A	498806535	498809142		Yes	-	-	5.37109	5.65495	5.72948	0.572886	0.391847	0.415288		Yes	Yes	Yes	5.19129	5.54498	6.40687	0.667246	0.766277	0.624823
TraesCS1A02G307400		chr1A	498809336	498811616		Yes	Yes	Yes	152.061	164.999	170.19	0.426587	0.397463	0.412806		Yes	Yes	Yes	248.294	265.493	283.983	0.300879	0.262021	0.223607
TraesCS1A02G307800		chr1A	499194444	499196325		Yes	-	-	5.33723	5.56531	6.40276	0.514553	0.414448	0.472988		Yes	Yes	Yes	8.71508	8.88423	10.1347	0.483792	0.464282	0.46462
TraesCS1A02G307900		chr1A	499438826	499441429		-	-	-	1.13633	0.898426	0.841524	1.08398	0.879657	0.857749		Yes	-	-	1.05902	1.18518	1.1279	1.05961	1.30011	0.975335
TraesCS1A02G308000		chr1A	499442990	499445475		Yes	-	-	11.6551	11.2926	10.4624	0.526701	0.452257	0.431215		Yes	Yes	Yes	10.4594	10.1421	9.22069	0.560892	0.562815	0.609544
TraesCS1A02G308100		chr1A	499446387	499451521		Yes	-	-	11.6711	11.1353	12.5799	0.441453	0.438995	0.452599		-	Yes	-	8.63739	9.02646	8.14145	0.668725	0.690243	0.638689
TraesCS1A02G308400		chr1A	499631910	499635857		-	-	-	8.93007	9.3208	9.76115	0.370705	0.388219	0.411321		Yes	-	-	15.9677	17.3542	17.4164	0.346449	0.309085	0.286733
TraesCS1A02G308700		chr1A	499783051	499784093		Yes	Yes	Yes	7.94729	7.93582	7.44289	0.503804	0.444585	0.474164		-	Yes	-	16.1447	18.0828	17.6363	0.605809	0.550196	0.579697
TraesCS1A02G308800		chr1A	499785000	499785395		Yes	Yes	Yes	33.9031	33.3995	31.7717	0.575416	0.53647	0.398604		-	Yes	-	60.8792	65.1055	69.8782	0.653597	0.662513	0.591777
TraesCS1A02G308900		chr1A	499794933	499798461		Yes	Yes	Yes	16.8735	15.2178	15.5924	0.688337	0.563771	0.645831		Yes	Yes	Yes	59.3412	51.3673	42.1666	0.407114	0.358375	0.419726
TraesCS1A02G309200		chr1A	499979280	499983095		Yes	-	-	18.8706	19.2899	22.8624	0.363615	0.377067	0.403317		-	Yes	-	6.4137	6.18561	6.34795	0.670294	0.69166	0.517746
TraesCS1A02G309700		chr1A	500562650	500566053		-	Yes	-	48.6323	54.6233	50.827	0.586981	0.428689	0.497502		Yes	Yes	Yes	25.4807	29.2233	33.7175	0.478834	0.395516	0.373899
TraesCS1A02G309800		chr1A	500663059	500665554		Yes	-	-	1.25968	1.35045	1.32158	1.09657	1.09172	0.976378		Yes	-	-	1.6545	1.95981	2.40851	1.1612	0.902323	0.819635
TraesCS1A02G310300		chr1A	500960302	500962329		-	Yes	-	1.28791	2.83195	1.59612	2.30382	4.2322	3.82933		-	Yes	-	6.1547	7.59219	7.3601	0.750019	0.928154	0.886429
TraesCS1A02G310500		chr1A	501026260	501031427		-	-	-	16.1083	16.0268	16.1813	0.340282	0.346435	0.33175		Yes	Yes	Yes	69.1181	75.2396	82.9135	0.405772	0.448575	0.414854
TraesCS1A02G310600		chr1A	501035064	501039351		Yes	Yes	Yes	2.8143	3.03065	3.35342	0.775449	0.937563	0.828976		Yes	Yes	Yes	9.8582	11.6636	16.393	0.695907	0.606385	0.646346
TraesCS1A02G310700		chr1A	501701967	501707884		Yes	Yes	Yes	5.93505	5.33495	6.30755	0.689404	0.565881	0.530584		Yes	Yes	Yes	4.85681	5.47069	5.59714	0.616871	0.583308	0.607812
TraesCS1A02G311000		chr1A	502677635	502679580		-	-	-	59.9173	57.2382	57.7916	0.34119	0.300944	0.292655		-	Yes	-	77.7276	72.2642	83.3787	0.437538	0.420677	0.31129
TraesCS1A02G311100		chr1A	502804558	502806739		Yes	Yes	Yes	4.39012	4.49593	3.97047	0.932964	0.875261	0.871048		-	Yes	-	6.35479	5.47395	6.91861	0.740881	0.873084	0.717811
TraesCS1A02G311300		chr1A	502841874	502842713		Yes	-	-	1.31449	1.47872	1.69588	0.835732	0.695003	0.97843		-	-	-	0.865303	1.00627	0.809219	1.11155	1.15001	1.18226
TraesCS1A02G311400		chr1A	503307415	503315657		-	-	-	14.4326	15.7626	16.438	0.337773	0.335647	0.36758		-	Yes	-	12.599	12.1987	12.8964	0.560567	0.60459	0.601002
TraesCS1A02G311800		chr1A	503368551	503373017		-	-	-	2.67419	2.98	3.16902	0.6675	0.732049	0.599943		-	Yes	-	4.35036	4.05769	4.48101	0.714401	0.826861	0.711392
TraesCS1A02G312000		chr1A	503379577	503381405		-	Yes	-	7.15905	6.87297	6.01125	0.455304	0.424423	0.505045		-	-	-	-	-	-	-	-	-
TraesCS1A02G312300		chr1A	504270809	504284581		-	Yes	-	2.79687	2.28485	2.83396	0.826017	0.778523	1.00584		Yes	Yes	Yes	2.62759	2.13793	2.11838	1.00636	0.944948	1.36024
TraesCS1A02G312400		chr1A	504313051	504315953		-	-	-	0.666809	0.593136	0.429282	1.70435	1.43789	1.3924		Yes	Yes	Yes	1.20789	1.47095	1.75093	1.33595	1.45331	2.18213
TraesCS1A02G312700		chr1A	504612656	504616703		Yes	Yes	Yes	21.8497	19.75	17.5245	0.677888	0.665641	0.72952		-	Yes	-	144.438	152.178	138.738	0.597002	0.561349	0.538087
TraesCS1A02G312800		chr1A	504631539	504633090		Yes	-	-	1.78798	1.97631	2.36797	0.96302	0.903746	0.845275		-	Yes	-	5.95409	6.50691	6.25937	0.788776	0.702539	0.739835
TraesCS1A02G313200		chr1A	505268095	505270519		-	-	-	3.19303	3.10832	3.62713	0.604312	0.505807	0.541397		Yes	-	-	4.97439	5.51778	5.66311	0.574543	0.582135	0.571828
TraesCS1A02G313300		chr1A	505270717	505273748		-	-	-	323.895	307.393	299.14	0.249	0.231251	0.265017		Yes	Yes	Yes	6.99386	7.14654	6.99584	0.542489	0.56053	0.451523
TraesCS1A02G313500		chr1A	505282426	505286315		Yes	-	-	1.33758	1.4563	1.84401	0.937856	0.893664	0.742922		Yes	-	-	1.23593	1.31556	1.34046	1.05432	1.18493	1.04085
TraesCS1A02G313700		chr1A	505467546	505475596		Yes	-	-	2.62246	2.61674	3.1862	0.674401	0.599417	0.556905		Yes	-	-	2.35742	2.16026	2.64341	0.862398	0.795187	0.78602
TraesCS1A02G313900		chr1A	505481101	505484095		Yes	-	-	0.947113	0.947474	0.973564	1.09799	0.990851	0.993487		Yes	Yes	Yes	4.4326	4.61394	5.89283	0.684991	0.677316	0.546737
TraesCS1A02G314100		chr1A	505668859	505679837		-	Yes	-	5.41656	6.08435	6.13402	0.809442	0.722034	0.660684		Yes	Yes	Yes	6.8953	6.13244	6.05169	0.720804	0.694553	0.733169
TraesCS1A02G314300		chr1A	505924971	505926207		-	-	-	47.0087	49.172	48.7073	0.454585	0.50686	0.491955		Yes	Yes	Yes	51.9216	49.791	45.7446	0.604017	0.565575	0.484735
TraesCS1A02G314400		chr1A	506281816	506286607		Yes	-	-	3.6216	3.72251	4.63828	0.546365	0.534073	0.487785		Yes	Yes	Yes	5.02454	4.51616	5.22292	0.702731	0.792913	0.646579
TraesCS1A02G315300		chr1A	506851793	506856579		Yes	-	-	1.85454	1.77605	1.41906	0.819524	0.832412	0.817169		Yes	-	-	1.36574	1.71905	1.65578	0.948254	0.849569	1.01184
TraesCS1A02G315400		chr1A	506998391	507003396		-	-	-	8.08969	7.87155	8.52134	0.456296	0.390981	0.401351		Yes	Yes	Yes	12.0555	11.123	10.8106	0.667536	0.63879	0.552899
TraesCS1A02G315500		chr1A	507076346	507078746		Yes	-	-	5.42442	4.90731	4.5471	0.506587	0.445926	0.477782		-	-	-	0.745218	0.667683	0.62367	1.28526	1.57306	1.08437
TraesCS1A02G315600		chr1A	507078983	507084348		Yes	-	-	9.59748	9.0768	9.73405	0.53149	0.492126	0.526325		-	Yes	-	19.2854	17.6371	16.2773	0.64577	0.603233	0.591877
TraesCS1A02G315900		chr1A	508133863	508153676		-	Yes	-	6.26038	5.71517	7.47019	0.58027	0.575017	0.569493		Yes	Yes	Yes	1.40491	1.27834	1.93688	1.45385	1.0892	0.918118
TraesCS1A02G317000		chr1A	508554720	508558232		Yes	-	-	7.19275	7.93985	8.31381	0.466334	0.380293	0.494361		-	Yes	-	5.71338	5.83101	6.4563	0.68362	0.619107	0.557143
TraesCS1A02G317200		chr1A	508640643	508644166		-	-	-	190.656	196.076	211.936	0.314277	0.329782	0.374125		Yes	Yes	Yes	414.481	360.992	350.945	0.474796	0.427118	0.464375
TraesCS1A02G317900		chr1A	509036504	509038028		-	Yes	-	8.19687	10.1482	7.98451	0.867531	0.632429	0.753723		Yes	Yes	Yes	1.97485	1.79517	1.44524	1.00541	1.14036	1.5264
TraesCS1A02G319000		chr1A	510280764	510282530		-	-	-	7.48684	8.37749	7.30789	0.532141	0.381022	0.470492		-	Yes	-	3.09287	2.86931	3.03912	0.944448	0.916423	0.622771
TraesCS1A02G319100		chr1A	510282724	510286786		-	-	-	5.85519	6.13366	6.32941	0.486048	0.405042	0.438373		-	Yes	-	4.71181	4.36702	5.00874	0.797888	0.650345	0.537583
TraesCS1A02G319400		chr1A	510366392	510367420		-	Yes	-	7.20983	8.07542	6.497	0.74672	0.545376	0.573906		-	-	-	-	-	-	-	-	-
TraesCS1A02G319500		chr1A	510373312	510373620		-	-	-	1.00475	1.00919	1.01164	1.12778	0.858573	0.993557		-	Yes	-	1.32388	1.33713	1.49586	1.201	1.21366	1.14991
TraesCS1A02G319600		chr1A	510378418	510380090		Yes	Yes	Yes	7.14653	7.05525	6.99316	0.480012	0.414364	0.549746		Yes	Yes	Yes	4.12913	4.86023	6.37796	0.82537	0.743168	0.652161
TraesCS1A02G320300		chr1A	511005281	511007520		-	-	-	0.773331	0.856446	0.935027	1.28096	1.29232	1.32383		Yes	Yes	Yes	2.49337	2.45393	3.0879	1.54879	1.0885	0.980209
TraesCS1A02G320500		chr1A	511099314	511102961		-	-	-	38.9823	38.1835	35.0733	0.347669	0.278876	0.24621		-	Yes	-	93.7382	95.7294	90.2068	0.542242	0.427241	0.47512
TraesCS1A02G320900		chr1A	511404376	511411090		Yes	Yes	Yes	2.47337	2.52597	2.57501	1.1205	0.791388	0.768768		Yes	Yes	Yes	4.67796	4.74832	5.25389	1.14906	0.729453	0.667316
TraesCS1A02G321000		chr1A	511481306	511484164		-	Yes	-	6.71217	7.46028	7.5371	0.590486	0.504756	0.519644		-	Yes	-	18.1554	20.0541	17.862	0.459915	0.449762	0.405206
TraesCS1A02G321100		chr1A	511499769	511502581		Yes	-	-	13.8786	15.3024	14.5512	0.489164	0.349308	0.343943		Yes	Yes	Yes	14.4167	17.954	18.7682	0.462881	0.440831	0.391242
TraesCS1A02G321700		chr1A	512643760	512651749		Yes	Yes	Yes	6.87716	6.99356	9.26145	0.580162	0.515737	0.556312		Yes	Yes	Yes	3.0913	3.46638	4.31766	1.11278	0.822174	0.787358
TraesCS1A02G321900		chr1A	512654234	512658884		Yes	-	-	22.2764	22.4271	23.1036	0.406641	0.321073	0.315652		-	-	-	25.5916	25.3422	27.7859	0.320498	0.322529	0.343346
TraesCS1A02G322000		chr1A	512665554	512666522		-	-	-	-	-	-	-	-	-		Yes	-	-	0.74334	0.655485	0.65289	1.85776	2.01126	1.47193
TraesCS1A02G322100		chr1A	512867153	512870409		-	Yes	-	6.30839	6.22022	6.30858	0.545449	0.519089	0.393924		-	-	-	0.981223	0.815228	0.844256	1.16997	1.21321	1.18784
TraesCS1A02G322300		chr1A	512875659	512884685		-	-	-	19.8776	19.6168	21.2076	0.266135	0.304274	0.256247		Yes	-	-	8.37267	7.8738	7.74927	0.45966	0.498287	0.461789
TraesCS1A02G322700		chr1A	513623272	513628004		Yes	Yes	Yes	1.5951	1.65194	1.84701	1.12007	1.14963	1.1631		-	-	-	1.52247	1.78583	2.15714	1.06231	1.16313	1.05104
TraesCS1A02G323000		chr1A	513660647	513662413		-	-	-	2.45393	2.1718	2.40176	0.697843	0.73552	0.826543		Yes	-	-	9.06082	8.25483	7.38	0.577351	0.502743	0.563971
TraesCS1A02G323200		chr1A	513717837	513726937		Yes	-	-	38.2381	40.0581	37.8426	0.34498	0.290809	0.33157		-	-	-	34.8068	34.7054	39.8605	0.331659	0.279847	0.276883
TraesCS1A02G323300		chr1A	513732695	513734048		Yes	-	-	1.13378	1.16991	1.20246	1.68753	0.953836	1.01793		-	-	-	0.591594	0.635708	0.65379	1.50701	1.90874	1.08624
TraesCS1A02G323400		chr1A	513735376	513739658		Yes	-	-	48.2539	50.0056	52.9502	0.394582	0.399233	0.354189		Yes	Yes	Yes	52.7456	55.354	76.2001	0.654492	0.62333	0.660668
TraesCS1A02G323500		chr1A	513879955	513894399		-	-	-	1.16646	1.12261	1.22561	0.987085	0.816515	1.09399		Yes	-	-	1.10973	0.963127	1.01646	1.77749	1.29445	1.14309
TraesCS1A02G324000		chr1A	514690116	514692269		Yes	Yes	Yes	5.31472	5.4914	6.80319	0.692604	0.875036	0.7672		Yes	Yes	Yes	21.2745	20.7745	22.7308	0.6953	0.655501	0.613646
TraesCS1A02G325200		chr1A	516064202	516064450		-	-	-	-	-	-	-	-	-		Yes	Yes	Yes	0.669177	1.07625	1.98092	1.68026	1.44606	1.36717
TraesCS1A02G325500		chr1A	516375691	516378593		-	Yes	-	6.61065	7.07992	7.04543	0.601744	0.658883	0.664236		-	-	-	-	-	-	-	-	-
TraesCS1A02G325600		chr1A	516430393	516432298		-	-	-	300.728	305.291	312.407	0.226768	0.213335	0.237629		Yes	Yes	Yes	223.169	230.401	251.714	0.35773	0.331368	0.381584
TraesCS1A02G325800		chr1A	516558476	516562933		-	-	-	0.696012	0.846203	0.628202	1.29329	1.26872	1.05486		Yes	Yes	Yes	3.26815	3.15307	3.36113	0.723928	0.853067	0.799069
TraesCS1A02G325900		chr1A	516563565	516574801		Yes	-	-	9.08352	9.45897	10.269	0.482105	0.355525	0.496148		Yes	Yes	Yes	10.79	9.77563	9.67417	0.652513	0.746197	0.58553
TraesCS1A02G326100		chr1A	516586125	516587361		Yes	Yes	Yes	20.3661	20.0424	17.8764	0.534649	0.366235	0.445307		-	-	-	-	-	-	-	-	-
TraesCS1A02G326200		chr1A	516623211	516627639		Yes	-	-	4.0495	4.07133	4.15342	0.590529	0.487052	0.619423		Yes	-	-	1.78807	1.50239	1.60457	1.05194	0.901504	0.895358
TraesCS1A02G326600		chr1A	516726322	516727346		Yes	Yes	Yes	1.20929	1.34821	2.21559	3.7571	1.98807	2.22834		Yes	Yes	Yes	106.318	151.035	165.968	0.899114	1.09481	0.849845
TraesCS1A02G326800		chr1A	516739314	516740335		Yes	Yes	Yes	5.41001	8.79031	16.6741	2.68857	1.80429	1.77152		Yes	Yes	Yes	86.3643	158.147	225.05	0.806765	1.00514	0.826711
TraesCS1A02G327000		chr1A	516774041	516780152		Yes	Yes	Yes	2.33684	2.89582	3.45738	0.895315	0.635373	0.717431		-	Yes	-	2.83209	3.32342	3.26867	0.712297	0.951836	0.640855
TraesCS1A02G327100		chr1A	516780762	516783619		Yes	-	-	1.95399	2.41489	2.51401	0.694545	0.633771	0.77744		-	Yes	-	8.64349	8.5998	9.50756	0.508232	0.535933	0.541858
TraesCS1A02G327200		chr1A	516786135	516789953		-	-	-	23.2366	23.1294	25.051	0.293245	0.29147	0.323012		Yes	-	-	25.3318	23.7698	26.1724	0.356993	0.459019	0.383832
TraesCS1A02G327700		chr1A	517095424	517101137		-	-	-	3.03905	3.15579	3.39105	0.663649	0.745961	0.6375		-	Yes	-	4.54188	4.3066	4.37794	0.730014	0.686628	0.686672
TraesCS1A02G328100		chr1A	517398036	517399020		Yes	Yes	Yes	4.40475	4.79685	4.04866	0.703319	0.624389	0.67836		Yes	Yes	Yes	1.08061	1.22018	1.43298	1.28272	1.21878	1.1352
TraesCS1A02G329200		chr1A	518015077	518021797		Yes	-	-	7.69725	7.59858	8.58419	0.423354	0.38247	0.425695		-	Yes	-	8.75318	8.25544	9.14122	0.632124	0.690429	0.655896
TraesCS1A02G329400		chr1A	518058089	518085731		-	Yes	-	1.39433	1.633	1.94563	0.745152	0.732627	0.71186		Yes	Yes	Yes	1.40295	0.975429	1.23225	1.44965	1.17973	1.028
TraesCS1A02G329500		chr1A	518472562	518474295		Yes	Yes	Yes	4.55521	2.91711	1.93182	1.68048	1.36994	1.3303		-	-	-	0.821925	0.920918	0.455788	1.83269	1.7889	1.91064
TraesCS1A02G329600		chr1A	518662080	518667158		-	-	-	1.98408	1.79373	1.91525	0.829694	0.923785	0.987199		Yes	-	-	1.65676	1.61844	1.75331	0.846863	0.94222	0.794775
TraesCS1A02G329700		chr1A	518682557	518682907		-	-	-	-	-	-	-	-	-		Yes	Yes	Yes	4.36154	4.60553	4.20283	1.92874	2.46227	2.52111
TraesCS1A02G330100		chr1A	518953205	518955924		-	Yes	-	70.9048	64.1973	69.2312	0.381646	0.365188	0.321878		Yes	Yes	Yes	118.728	119.459	122.212	0.337483	0.338816	0.34578
TraesCS1A02G330200		chr1A	518971862	518974434		Yes	-	-	3.87358	4.49828	4.60581	0.716475	0.531336	0.541726		Yes	Yes	Yes	3.08491	3.2506	3.45325	1.00262	0.924835	0.631414
TraesCS1A02G330500		chr1A	519251783	519260058		-	-	-	41.4805	38.1034	41.8184	0.336607	0.338936	0.33169		Yes	Yes	Yes	61.7881	56.145	58.5209	0.429309	0.515753	0.458656
TraesCS1A02G330700		chr1A	519620475	519629516		-	-	-	15.9113	16.0469	16.842	0.391399	0.403272	0.352787		Yes	Yes	Yes	7.71515	8.84903	9.3182	0.419191	0.512252	0.456738
TraesCS1A02G330900		chr1A	519872272	519873680		-	-	-	35.7772	37.6252	33.7568	0.53856	0.487328	0.518261		Yes	Yes	Yes	51.2442	55.052	71.1209	0.400534	0.414427	0.452369
TraesCS1A02G331100		chr1A	520122569	520125966		Yes	-	-	2.01802	2.24701	2.09331	0.872503	0.581515	0.674891		-	-	-	-	0.34995	0.558639	-	1.43566	1.36012
TraesCS1A02G331200		chr1A	520337993	520344774		-	-	-	5.02422	5.13035	5.64823	0.474416	0.462551	0.494507		Yes	Yes	Yes	5.38212	4.96917	6.53992	0.661353	0.610794	0.579217
TraesCS1A02G331800		chr1A	520569996	520574179		Yes	-	-	1.17099	1.3744	1.24589	1.00295	0.815122	0.993524		Yes	-	-	1.39526	1.89967	1.83321	1.04033	0.963523	0.763654
TraesCS1A02G331900		chr1A	520579667	520584624		Yes	-	-	10.9669	11.6034	14.2	0.376716	0.327029	0.303343		Yes	Yes	Yes	8.65735	9.12662	9.27444	0.497826	0.564621	0.381262
TraesCS1A02G332000		chr1A	520763140	520764091		-	-	-	0.729712	0.592943	0.684016	1.03153	1.43102	1.42882		-	Yes	-	55.6223	57.4763	48.6731	0.430611	0.426349	0.382966
TraesCS1A02G332200		chr1A	520789098	520792010		Yes	Yes	Yes	9.97663	9.29772	9.27409	0.409823	0.426375	0.471987		-	-	-	-	-	-	-	-	-
TraesCS1A02G332400		chr1A	520810335	520814520		-	Yes	-	3.46597	4.0818	4.40141	0.488895	0.454482	1.07616		Yes	Yes	Yes	3.98755	4.44418	4.87205	0.767879	0.600576	0.508531
TraesCS1A02G332500		chr1A	520819952	520822444		Yes	Yes	Yes	15.8782	19.9274	19.6464	0.658963	0.56208	0.555343		Yes	Yes	Yes	4.37375	6.2447	6.03265	0.804808	0.82164	0.563653
TraesCS1A02G332600		chr1A	520938291	520940709		Yes	-	-	14.0558	15.5684	16.5977	0.479365	0.437165	0.41729		-	-	-	-	-	-	-	-	-
TraesCS1A02G332800		chr1A	521256437	521260120		-	-	-	-	-	-	-	-	-		Yes	Yes	Yes	3.5111	3.23283	3.17793	1.02548	0.852879	0.893948
TraesCS1A02G332900		chr1A	521269653	521274466		-	-	-	1.27837	1.28775	1.47112	1.10156	0.741947	1.0388		Yes	-	-	2.98682	3.28554	4.1256	0.763527	0.772622	0.564649
TraesCS1A02G333000		chr1A	521275806	521279686		-	-	-	6.72535	6.73753	7.39268	0.530316	0.403767	0.479725		Yes	Yes	Yes	6.94734	7.19953	8.0798	0.585565	0.618074	0.55343
TraesCS1A02G333200		chr1A	521288999	521292366		-	-	-	3.58453	3.23944	3.55021	0.635642	0.476118	0.609372		Yes	-	-	3.43458	3.3215	3.30291	0.711353	0.703163	0.610986
TraesCS1A02G333400		chr1A	521322211	521323613		Yes	-	-	6.1867	6.71197	7.48885	0.541071	0.422911	0.436698		-	Yes	-	12.986	14.7878	15.0254	0.495208	0.534283	0.513652
TraesCS1A02G333600		chr1A	521331628	521333842		Yes	Yes	Yes	3.61266	3.94039	4.26358	0.771537	0.647286	0.637327		Yes	Yes	Yes	2.14315	2.36264	2.48469	0.750439	0.754196	0.638263
TraesCS1A02G333700		chr1A	521337020	521340794		-	-	-	23.9084	22.8738	22.6923	0.304506	0.288899	0.310021		-	Yes	-	23.1191	21.7644	23.9218	0.52562	0.557976	0.496257
TraesCS1A02G333800		chr1A	521629027	521630592		-	-	-	4.14418	4.32348	4.56661	0.608119	0.47919	0.541768		Yes	Yes	Yes	4.51864	4.82558	7.38893	0.680377	0.663036	0.594885
TraesCS1A02G334100		chr1A	521738721	521739592		Yes	Yes	Yes	5.52081	5.65111	5.87036	1.02504	1.02774	1.00443		-	Yes	-	25.0177	25.6472	25.3403	0.588212	0.538427	0.535277
TraesCS1A02G334400		chr1A	521876736	521878499		Yes	Yes	Yes	4.25426	4.38705	4.7146	0.955897	0.718977	0.746524		Yes	Yes	Yes	3.24449	3.99227	4.73933	0.958987	1.13628	1.01716
TraesCS1A02G334500		chr1A	521907397	521907627		-	-	-	-	-	-	-	-	-		Yes	Yes	Yes	2.52245	3.10648	5.14543	1.22427	0.964122	0.976761
TraesCS1A02G334700		chr1A	521977589	521979551		-	Yes	-	6.87138	8.01631	5.85558	0.99988	0.87236	0.839247		-	-	-	-	-	-	-	-	-
TraesCS1A02G334800		chr1A	522189569	522191557		Yes	Yes	Yes	4.94033	4.40574	5.3604	1.9437	1.90087	1.80099		-	-	-	-	-	-	-	-	-
TraesCS1A02G335100		chr1A	522239104	522243100		-	-	-	0.574374	0.512533	0.388168	1.40001	1.31239	1.89488		Yes	Yes	Yes	14.6452	12.4832	10.2785	0.675805	0.633631	0.586188
TraesCS1A02G335200		chr1A	522463391	522472915		-	Yes	-	6.85066	7.43101	6.73222	1.15699	0.939755	1.01801		-	Yes	-	21.1504	18.7951	24.2272	0.707567	0.690255	0.625705
TraesCS1A02G335300		chr1A	522500226	522502152		-	Yes	-	2.09676	2.30678	1.75479	1.03906	0.877546	0.968712		Yes	Yes	Yes	6.80755	5.8355	5.05762	0.962081	0.81456	0.931337
TraesCS1A02G335400		chr1A	522506031	522507534		Yes	-	-	1.70721	1.95983	1.86766	1.09529	0.979216	1.08781		Yes	Yes	Yes	5.23725	4.49222	2.99642	0.743659	0.766641	0.965552
TraesCS1A02G335500		chr1A	522509275	522510932		-	-	-	-	-	-	-	-	-		Yes	Yes	Yes	1.58381	1.43788	0.641414	1.44486	1.38344	1.27613
TraesCS1A02G335700		chr1A	522533508	522538864		Yes	Yes	Yes	6.57986	6.43508	5.22857	0.780552	0.640202	0.86752		-	-	-	0.432269	0.481193	0.582882	1.68949	1.44743	1.32779
TraesCS1A02G335900		chr1A	522950013	522953483		-	-	-	6.812	6.97218	8.41309	0.407919	0.371423	0.313755		Yes	-	-	10.6669	10.8608	10.5337	0.414129	0.427808	0.383014
TraesCS1A02G336000		chr1A	522954462	522958922		-	-	-	9.42508	10.9742	10.8451	0.444907	0.374868	0.464117		Yes	-	-	9.82479	10.0926	10.396	0.498856	0.470131	0.398193
TraesCS1A02G337900		chr1A	527179419	527181217		-	Yes	-	14.415	13.0208	12.3695	1.09676	1.14532	1.00924		-	Yes	-	8.00125	8.29221	7.05667	1.17572	1.06577	1.17336
TraesCS1A02G338200		chr1A	527950264	527955845		Yes	-	-	10.8358	10.5882	9.15949	0.433462	0.416235	0.371362		Yes	-	-	21.0607	21.1137	23.1644	0.413176	0.416457	0.400079
TraesCS1A02G338300		chr1A	527959069	527963272		Yes	Yes	Yes	4.76089	4.72195	4.63982	0.594727	0.47383	0.63402		Yes	Yes	Yes	10.7767	10.176	9.66253	0.665207	0.56988	0.559254
TraesCS1A02G338400		chr1A	527974245	527974801		-	-	-	-	0.305258	-	-	1.71186	-		Yes	-	-	0.604918	0.704066	0.615831	1.93688	1.47626	1.71792
TraesCS1A02G338500		chr1A	528063693	528073298		Yes	-	-	25.3124	23.6219	21.0212	0.669302	0.611268	0.620469		-	-	-	50.6554	46.1292	47.6505	0.394734	0.323742	0.374547
TraesCS1A02G338700	TaVQ4-A1	chr1A	528102140	528103155		-	-	-	1.13807	1.24526	1.17297	1.62231	1.50996	1.69945		Yes	-	-	3.73822	4.21379	4.51568	1.47509	1.6292	1.62925
TraesCS1A02G338900		chr1A	528665411	528674079		Yes	-	-	9.281	10.7482	11.1645	0.418424	0.295345	0.291956		Yes	Yes	Yes	15.1314	14.5098	16.1747	0.537682	0.537273	0.540421
TraesCS1A02G339200		chr1A	529242438	529243257		-	-	-	0.482345	0.756195	0.679894	1.28099	1.21073	1.59052		Yes	Yes	Yes	1.18597	1.59385	1.5553	1.08374	1.63832	1.22414
TraesCS1A02G339300		chr1A	529244047	529249909		-	Yes	-	7.19067	6.99794	6.8819	0.677281	0.60413	0.669138		-	Yes	-	6.2074	5.99587	7.52994	0.693848	0.767745	0.609522
TraesCS1A02G339400		chr1A	529664143	529665828		-	Yes	-	2.76393	3.48773	2.55367	0.989714	0.719716	0.889103		-	-	-	-	-	-	-	-	-
TraesCS1A02G339500		chr1A	529665844	529671485		Yes	Yes	Yes	6.49541	8.06142	8.93592	0.599836	0.431051	0.476376		Yes	Yes	Yes	7.94138	8.09103	9.10379	0.647252	0.705245	0.571322
TraesCS1A02G339600		chr1A	530170540	530174060		Yes	-	-	13.6894	13.0315	12.9345	0.422287	0.386745	0.481348		Yes	Yes	Yes	10.3529	8.61661	9.34385	0.536517	0.588831	0.59335
TraesCS1A02G339700		chr1A	530176569	530178328		-	-	-	0.740729	0.772537	0.607551	1.19567	1.26883	1.05387		Yes	-	-	1.03893	1.14255	0.650797	1.0373	2.18181	1.41076
TraesCS1A02G339800		chr1A	530203238	530208368		Yes	-	-	1.47873	1.42387	1.14968	0.85076	0.787301	0.900746		Yes	-	-	1.62196	1.01181	1.59015	1.2785	0.97179	0.869461
TraesCS1A02G340000		chr1A	530232382	530237381		Yes	-	-	4.73608	5.15516	5.63119	0.694099	0.50033	0.511977		Yes	Yes	Yes	4.89617	5.08619	6.08923	0.740082	0.729483	0.521625
TraesCS1A02G340200		chr1A	530511919	530515502		-	-	-	12.2995	12.6066	12.8862	0.324067	0.285981	0.327619		-	Yes	-	6.08214	6.79777	6.65956	0.525608	0.656193	0.495915
TraesCS1A02G340400		chr1A	530593686	530600419		-	-	-	26.5318	27.3199	28.3327	0.300695	0.282106	0.248303		Yes	Yes	Yes	22.7707	20.8599	23.9988	0.514208	0.486782	0.45539
TraesCS1A02G340600		chr1A	530728795	530731511		Yes	-	-	2.72134	2.91963	3.07077	0.647393	0.576488	0.631413		Yes	Yes	Yes	4.18037	4.02844	4.45816	0.656304	0.592206	0.664162
TraesCS1A02G340700		chr1A	530731929	530736293		Yes	-	-	3.13788	3.21373	3.7021	0.638548	0.541344	0.580688		-	-	-	1.3066	1.39039	1.57232	1.28344	1.03164	1.14844
TraesCS1A02G340900		chr1A	530780002	530782491		Yes	Yes	Yes	4.52159	4.8684	5.55026	0.690878	0.519133	0.548301		Yes	Yes	Yes	4.56938	4.44557	5.19617	0.749233	0.604183	0.862252
TraesCS1A02G341300		chr1A	531023766	531028367		-	Yes	-	68.545	88.2678	81.2107	0.592632	0.49643	0.570604		-	-	-	0.326286	-	-	1.84233	-	-
TraesCS1A02G341500		chr1A	531051787	531059503		Yes	-	-	2.5715	2.95485	3.35096	0.731023	0.776706	0.75351		-	Yes	-	2.7204	2.45302	3.11166	0.963775	0.970231	0.936928
TraesCS1A02G342000		chr1A	531366927	531368375		Yes	Yes	Yes	1.99742	1.2318	0.863526	1.06598	1.00808	1.40086		Yes	Yes	Yes	33.5815	33.2146	31.413	0.565396	0.607912	0.528899
TraesCS1A02G342800		chr1A	531645592	531645996		-	-	-	-	-	-	-	-	-		-	Yes	-	1.26334	1.95968	1.80183	1.42438	1.31574	1.28094
TraesCS1A02G342900		chr1A	531682419	531688487		Yes	Yes	Yes	9.6843	8.57303	8.79173	0.529224	0.407533	0.50916		Yes	Yes	Yes	17.3642	17.0031	16.8625	0.646292	0.574097	0.63561
TraesCS1A02G343000		chr1A	531717107	531722375		Yes	Yes	Yes	11.8972	10.1529	9.96105	0.614889	0.488175	0.585627		-	Yes	-	23.505	21.5213	23.1993	0.731098	0.695369	0.685399
TraesCS1A02G343300		chr1A	531877397	531880159		Yes	Yes	Yes	14.7799	12.8075	12.2911	0.867332	0.742742	0.761851		-	-	-	37.7198	36.6258	35.0026	0.489547	0.513499	0.544101
TraesCS1A02G343700		chr1A	532089135	532090633		-	Yes	-	19.6014	20.4252	18.9175	0.650937	0.672248	0.670738		-	Yes	-	11.2457	10.7018	10.5914	0.713347	0.619353	0.51408
TraesCS1A02G344000		chr1A	532248856	532254040		Yes	-	-	33.8616	33.3101	35.5696	0.437015	0.38554	0.390218		Yes	Yes	Yes	132.665	131.055	136.596	0.434807	0.435333	0.438444
TraesCS1A02G344300		chr1A	532378806	532385116		-	-	-	-	-	-	-	-	-		Yes	-	-	1.34562	0.939391	0.847131	1.17515	1.26721	1.17705
TraesCS1A02G345500		chr1A	532747637	532757674		-	-	-	-	-	-	-	-	-		Yes	-	-	0.703748	0.945523	0.990081	1.47375	1.38616	1.23065
TraesCS1A02G345700		chr1A	532769019	532774372		-	-	-	-	-	-	-	-	-		Yes	-	-	2.51216	2.41597	2.17828	0.842004	0.882034	0.929358
TraesCS1A02G345900		chr1A	532777275	532780294		-	-	-	15.2367	15.8305	17.837	0.339303	0.273649	0.268398		Yes	-	-	19.5048	20.2073	19.8634	0.344501	0.357616	0.273479
TraesCS1A02G346500		chr1A	532967313	532968546		-	-	-	0.678586	0.746037	1.23842	1.41802	1.13034	1.30643		Yes	Yes	Yes	11.7245	11.0531	10.3947	1.01804	0.956598	0.877714
TraesCS1A02G347000		chr1A	533211925	533213298		-	-	-	1.32682	1.29392	1.06184	1.11859	1.55716	1.29321		-	Yes	-	3.92382	4.07328	2.78104	1.49507	1.44745	0.999723
TraesCS1A02G347100		chr1A	533252923	533256386		Yes	-	-	5.43296	5.46189	5.60461	0.430008	0.496004	0.483926		Yes	Yes	Yes	3.13043	3.32602	3.74091	0.713235	0.647873	0.532663
TraesCS1A02G347200		chr1A	533257093	533258530		-	-	-	0.715042	0.721857	0.65292	1.41926	0.987631	0.942284		-	Yes	-	1.72825	1.86469	1.64923	1.45502	0.998327	0.893772
TraesCS1A02G347400		chr1A	533323357	533324985		-	-	-	1.13457	0.937271	0.886221	1.24146	1.0129	1.02352		Yes	Yes	Yes	1.8516	1.70069	1.52917	0.999093	1.10281	1.01287
TraesCS1A02G347700		chr1A	533447254	533456110		-	-	-	22.6374	23.3815	22.1922	0.326698	0.301275	0.306555		Yes	Yes	Yes	24.7603	26.1889	33.158	0.464155	0.532358	0.453802
TraesCS1A02G347800		chr1A	533461442	533462234		Yes	-	-	1.30292	1.48999	1.71309	0.938725	0.722959	0.710356		Yes	-	-	1.4881	1.94705	2.12933	0.913194	0.875449	0.820367
TraesCS1A02G347900		chr1A	533462403	533467428		-	-	-	1.12722	1.16582	1.0576	1.56438	1.07974	1.1421		-	Yes	-	2.02246	2.19694	2.0102	0.97447	1.27499	1.03146
TraesCS1A02G348000		chr1A	533468166	533469169		-	-	-	0.661716	0.800866	0.781054	1.22501	1.02049	1.12498		Yes	-	-	0.666376	1.01037	1.0632	1.15418	1.10048	0.951749
TraesCS1A02G348300		chr1A	533694570	533697025		Yes	-	-	3.75554	4.09318	4.04039	0.534194	0.49901	0.513655		Yes	Yes	Yes	2.72035	2.69873	3.34202	1.09788	0.808279	0.66163
TraesCS1A02G348500		chr1A	533732274	533734650		-	-	-	10.9698	12.8426	13.2735	0.376545	0.318799	0.339529		Yes	Yes	Yes	27.2632	28.1739	34.9783	0.509879	0.567662	0.549283
TraesCS1A02G348800		chr1A	534050127	534052835		-	-	-	1.85601	2.19078	1.8188	0.8043	0.911759	0.883991		Yes	-	-	15.7318	16.8442	19.3523	0.545248	0.536066	0.453714
TraesCS1A02G348900		chr1A	534241162	534246393		Yes	-	-	3.69527	4.2281	4.70921	0.605171	0.592764	0.576552		Yes	Yes	Yes	3.19031	2.69346	3.26794	0.833009	0.895408	0.747334
TraesCS1A02G349000		chr1A	534258973	534262100		Yes	-	-	3.1043	3.55805	3.64779	1.05705	0.925576	0.819386		Yes	-	-	0.800833	0.706288	1.00057	1.28868	1.20997	1.02999
TraesCS1A02G349100		chr1A	534262362	534265794		-	-	-	20.2797	21.0086	23.0356	0.355198	0.374809	0.320652		-	Yes	-	16.0146	15.1043	15.3982	0.404684	0.468189	0.433359
TraesCS1A02G349200		chr1A	534267762	534272143		Yes	-	-	17.9668	17.5305	17.2535	0.627166	0.673602	0.61783		-	Yes	-	25.2722	25.3707	23.027	0.578517	0.577765	0.549214
TraesCS1A02G349900		chr1A	534930977	534933809		Yes	Yes	Yes	15.334	13.7187	11.819	1.1581	0.784021	0.665228		-	Yes	-	4.27107	4.13083	3.47569	0.7958	0.865994	0.753158
TraesCS1A02G350100		chr1A	535027813	535033173		Yes	Yes	Yes	7.95528	7.86807	9.02413	0.597997	0.474441	0.513786		-	-	-	0.690391	0.587377	0.4231	1.52208	1.82445	1.59648
TraesCS1A02G350200		chr1A	535062101	535064765		-	Yes	-	449.814	473.148	487.245	0.47706	0.366593	0.426012		Yes	Yes	Yes	628.741	657.106	681.963	0.356944	0.320987	0.314654
TraesCS1A02G350400		chr1A	535311667	535313964		-	-	-	1.55936	1.20592	1.44666	0.999886	0.941209	1.51619		Yes	Yes	Yes	1.48816	1.17867	1.18861	1.16233	1.16575	0.954081
TraesCS1A02G350600		chr1A	535323850	535328371		Yes	-	-	2.66727	2.85863	3.2818	0.669219	0.602501	0.740505		-	Yes	-	3.98243	3.80356	4.07399	0.753041	0.632215	0.584069
TraesCS1A02G350900		chr1A	535445352	535445783		-	-	-	0.581579	0.673982	0.62922	1.22282	1.11658	1.53397		-	Yes	-	3.49718	4.00428	3.06742	1.29054	1.32209	1.08914
TraesCS1A02G351000		chr1A	535446433	535447323		-	Yes	-	3.0463	3.01166	2.53404	0.968338	0.719408	1.12229		-	Yes	-	6.66215	7.53579	4.51481	0.686701	0.743894	0.722726
TraesCS1A02G351300		chr1A	535857780	535858706		Yes	Yes	Yes	5.49526	5.84286	4.95602	0.715935	0.705241	0.762031		Yes	Yes	Yes	24.3188	27.493	27.819	0.685954	0.495526	0.536128
TraesCS1A02G351600		chr1A	536067155	536068747		Yes	Yes	Yes	6.44825	5.25184	4.47404	1.01035	0.966524	1.08425		Yes	Yes	Yes	19.8959	21.0803	17.6127	0.796427	0.734761	0.627798
TraesCS1A02G351900		chr1A	536353547	536356836		-	-	-	35.2797	35.0172	36.2867	0.667098	0.635674	0.592023		Yes	Yes	Yes	41.8698	41.8163	47.0098	0.830637	0.98917	0.759358
TraesCS1A02G352000		chr1A	536427616	536434556		-	-	-	14.0068	13.7337	14.6615	0.327492	0.357348	0.355015		-	Yes	-	25.444	24.9821	24.8775	0.507021	0.524599	0.550937
TraesCS1A02G352100		chr1A	536437267	536439536		Yes	-	-	0.795001	1.18218	1.20245	1.47518	1.1981	1.02944		-	-	-	-	-	-	-	-	-
TraesCS1A02G352500		chr1A	536630497	536633240		Yes	Yes	Yes	27.4926	25.9799	23.1536	0.403372	0.404009	0.465306		-	Yes	-	2.15999	1.85081	1.50387	1.24266	1.10741	0.977254
TraesCS1A02G352700		chr1A	536660906	536664606		Yes	-	-	5.08049	4.9581	4.59025	0.637437	0.589748	0.545445		-	Yes	-	4.89326	4.15943	4.46442	0.944209	1.3594	0.93988
TraesCS1A02G352800		chr1A	536664937	536667287		Yes	-	-	11.617	11.9923	11.9638	0.400944	0.377607	0.374612		Yes	Yes	Yes	17.8356	18.374	22.2143	0.412516	0.357132	0.333322
TraesCS1A02G353300		chr1A	536958431	536965909		-	-	-	10.3522	11.4356	12.1692	0.50872	0.491844	0.456878		Yes	-	-	1.60292	1.42057	1.36269	1.09633	1.07076	1.04425
TraesCS1A02G353800		chr1A	537070049	537077429		Yes	-	-	4.88546	5.35167	5.41249	0.546119	0.431887	0.458683		Yes	Yes	Yes	7.4957	8.08927	8.19839	0.568223	0.542431	0.47334
TraesCS1A02G354000		chr1A	537081891	537083849		-	-	-	-	0.481428	-	-	1.60241	-		-	Yes	-	3.9192	3.74412	3.64689	0.727232	0.900904	0.698604
TraesCS1A02G354400		chr1A	537352530	537356855		-	-	-	27.7235	29.2236	30.5484	0.34606	0.306603	0.314198		Yes	-	-	26.2495	27.2533	31.1513	0.383554	0.391087	0.367074
TraesCS1A02G354500		chr1A	537530760	537533455		-	Yes	-	12.8935	12.9183	13.3146	0.344852	0.347324	0.383261		-	-	-	1.25353	1.13377	1.2982	1.24941	1.23889	1.08272
TraesCS1A02G354600		chr1A	537537886	537542073		-	-	-	3.92255	4.06994	4.33704	0.480696	0.555386	0.561108		-	Yes	-	7.66569	6.5152	7.33471	0.667972	0.73523	0.624853
TraesCS1A02G355100		chr1A	537827200	537831773		Yes	-	-	17.0693	17.5787	19.3378	0.417856	0.445022	0.381986		Yes	-	-	16.9804	17.7926	18.7638	0.419746	0.394956	0.340705
TraesCS1A02G355200		chr1A	537961308	537965635		-	-	-	23.8706	24.4659	25.0277	0.265626	0.226444	0.245095		Yes	Yes	Yes	7.61301	7.82756	8.5247	0.438436	0.532988	0.416153
TraesCS1A02G355300		chr1A	537966441	537967220		-	Yes	-	10.4321	9.65974	12.259	0.980689	0.90027	0.808603		-	Yes	-	1.14059	1.20239	1.907	1.63258	1.77701	1.25609
TraesCS1A02G355400		chr1A	537969896	537972802		Yes	-	-	1.01732	1.10243	1.12791	1.53424	1.08796	1.22369		Yes	-	-	1.19917	1.28489	1.15627	1.28055	1.09878	0.91499
TraesCS1A02G355500		chr1A	537973729	537978240		Yes	-	-	13.1061	12.4734	12.3678	0.507	0.431149	0.454887		Yes	Yes	Yes	10.3294	10.5068	9.89876	0.541859	0.586107	0.511029
TraesCS1A02G355700		chr1A	538782871	538783837		-	-	-	-	-	-	-	-	-		Yes	Yes	Yes	2.51489	3.52695	4.87565	0.856705	0.764465	0.765914
TraesCS1A02G355800		chr1A	538804851	538808313		-	-	-	1.96955	1.95984	2.15891	0.931924	0.813805	0.744659		Yes	-	-	2.65184	2.34261	2.6677	0.804256	0.744841	0.65018
TraesCS1A02G356000		chr1A	539315813	539316788		-	-	-	-	-	-	-	-	-		Yes	-	-	1.00347	0.95307	0.836217	1.20731	1.79781	1.30934
TraesCS1A02G356200		chr1A	539329708	539335195		-	Yes	-	1.69475	1.52714	1.64351	0.787709	0.718636	0.947004		Yes	Yes	Yes	5.28793	5.36375	6.22629	0.770126	0.723307	0.642529
TraesCS1A02G356300		chr1A	539425583	539428443		-	-	-	-	-	-	-	-	-		Yes	Yes	Yes	28.5994	28.2818	25.8429	0.423935	0.431406	0.455207
TraesCS1A02G356500		chr1A	539702670	539703620		Yes	-	-	1.9792	2.12825	1.95953	0.951465	0.885438	0.858155		Yes	-	-	2.07396	2.55623	2.48435	0.819163	0.841433	0.733659
TraesCS1A02G356900		chr1A	539759853	539763795		-	Yes	-	6.776	6.58476	6.24339	1.00384	0.689634	0.584082		Yes	Yes	Yes	22.2974	19.4786	18.58	0.474715	0.47914	0.545087
TraesCS1A02G357200		chr1A	539899281	539901954		-	-	-	9.31524	11.3518	11.6326	0.520773	0.407831	0.490235		Yes	-	-	7.56712	8.52612	9.84236	0.667008	0.655255	0.651138
TraesCS1A02G357300		chr1A	539964292	539969025		Yes	-	-	3.43498	3.33648	3.83199	0.751454	0.620438	0.782937		Yes	Yes	Yes	19.6477	19.6762	17.9497	0.571078	0.643593	0.685889
TraesCS1A02G357500		chr1A	540047477	540052240		Yes	-	-	11.1148	13.6012	14.3807	0.444208	0.432788	0.414459		Yes	Yes	Yes	9.00467	8.88062	9.00663	0.75346	0.497502	0.481436
TraesCS1A02G357700		chr1A	540124030	540124804		-	Yes	-	1.30442	2.17243	1.39049	1.5538	1.62489	1.57374		-	-	-	-	-	-	-	-	-
TraesCS1A02G358000		chr1A	540152157	540154702		-	-	-	12.3489	11.8817	11.0765	0.359307	0.310854	0.353259		Yes	Yes	Yes	7.84338	7.63185	7.90013	0.59734	0.538451	0.513937
TraesCS1A02G358100		chr1A	540191129	540192273		-	Yes	-	3.23992	3.55806	3.38482	0.808485	0.775515	0.817072		Yes	Yes	Yes	2.21966	1.68813	1.22069	1.84655	1.91992	1.09152
TraesCS1A02G358400		chr1A	540286427	540287431		-	Yes	-	5.48803	5.26601	5.52664	0.686757	0.639939	0.618668		Yes	Yes	Yes	4.39689	3.44684	2.96914	1.15102	1.0894	0.911401
TraesCS1A02G358600		chr1A	540336968	540339603		Yes	-	-	25.0048	24.5041	27.3771	0.814189	0.790507	0.758323		Yes	Yes	Yes	14.0292	11.7427	9.16843	0.539904	0.548293	0.487255
TraesCS1A02G358800		chr1A	540402336	540410089		-	-	-	7.54461	7.28563	7.9736	0.393015	0.448439	0.422554		Yes	Yes	Yes	3.83674	3.33048	3.26477	0.776496	0.792941	0.638319
TraesCS1A02G359100		chr1A	540627350	540628804		Yes	Yes	Yes	17.8229	17.5346	15.3377	0.627317	0.670335	0.616582		Yes	Yes	Yes	9.16902	9.5896	10.7522	0.747659	0.537788	0.567118
TraesCS1A02G359300		chr1A	540647139	540657788		Yes	-	-	4.49999	4.54678	5.28645	0.51621	0.498352	0.469198		Yes	Yes	Yes	2.69877	2.83411	3.03629	0.755097	0.681045	0.580174
TraesCS1A02G359400		chr1A	540887567	540888605		-	-	-	29.4375	28.7687	30.8758	0.255603	0.251952	0.230077		Yes	-	-	26.3043	28.1747	28.1484	0.314141	0.365558	0.269284
TraesCS1A02G359800		chr1A	541319198	541319946		-	Yes	-	2.90308	2.69421	2.43322	1.9917	1.29574	1.28947		Yes	Yes	Yes	5.12075	5.56592	5.6158	1.12616	0.904991	0.93163
TraesCS1A02G359900		chr1A	541343758	541344446		-	Yes	-	7.9933	8.3917	7.3195	1.36161	0.883346	0.874645		-	Yes	-	16.5458	17.5336	15.4736	0.916003	0.896274	1.00315
TraesCS1A02G360000		chr1A	541381311	541382054		Yes	Yes	Yes	22.4686	26.0923	24.3916	1.017	0.723327	0.733984		-	Yes	-	33.1865	35.0804	33.0335	0.738082	0.609932	0.69446
TraesCS1A02G360100		chr1A	541460217	541460850		Yes	Yes	Yes	3.03602	2.76582	2.20547	1.91957	1.93679	1.71893		-	Yes	-	6.00254	6.12489	4.44815	1.63191	1.70009	1.53493
TraesCS1A02G360200		chr1A	541462716	541463412		-	Yes	-	21.5684	25.5118	22.1272	0.969562	0.78162	0.786433		-	Yes	-	28.2039	31.6835	27.9442	0.632324	0.579654	0.678365
TraesCS1A02G360300		chr1A	541465861	541473374		Yes	-	-	7.07927	6.84882	7.01361	0.632859	0.516288	0.558055		-	Yes	-	5.12595	5.62106	5.63117	0.671112	0.646751	0.581169
TraesCS1A02G360400		chr1A	541628156	541631935		-	Yes	-	4.44919	4.05075	4.12892	0.939207	0.798749	0.795353		-	Yes	-	4.99991	4.62019	3.60125	1.04807	0.722762	0.81006
TraesCS1A02G360700		chr1A	541769876	541772932		-	Yes	-	2.50382	3.1576	2.66083	0.846438	0.702959	0.812324		Yes	Yes	Yes	2.84773	3.3139	4.11638	0.897852	1.00517	0.893023
TraesCS1A02G361000		chr1A	541983708	541987722		-	Yes	-	10.8319	10.7583	9.97641	0.753351	0.680824	0.711977		-	-	-	0.781889	0.615597	0.642796	1.42589	1.14787	1.00783
TraesCS1A02G361100		chr1A	541988486	541992834		-	-	-	19.0724	18.1144	17.2269	0.480828	0.477199	0.471325		-	Yes	-	19.105	17.6358	19.6698	0.395971	0.488606	0.404405
TraesCS1A02G361200		chr1A	541993159	541997451		-	Yes	-	4.57861	4.71775	5.33448	0.760056	0.600705	0.643361		-	Yes	-	6.02855	5.49957	5.37066	0.602198	0.577328	0.504539
TraesCS1A02G361300		chr1A	541997515	541998469		-	-	-	3.56685	3.624	3.96809	0.676817	0.512552	0.550488		-	Yes	-	3.08257	3.25596	3.32684	0.929398	0.922991	0.789901
TraesCS1A02G361400		chr1A	541999826	542004979		-	Yes	-	2.45245	2.67325	2.50014	0.982433	0.778578	0.749484		Yes	-	-	2.06203	2.43144	2.74952	0.934041	0.883678	0.731766
TraesCS1A02G361500		chr1A	542136091	542142921		-	-	-	5.60991	5.9335	6.50515	0.448663	0.376914	0.409082		-	Yes	-	4.75106	4.66301	5.24049	0.614364	0.635369	0.702164
TraesCS1A02G361600		chr1A	542167994	542168455		-	Yes	-	14.8623	15.9819	13.9504	1.04796	0.802278	0.693882		-	Yes	-	44.8837	48.5013	43.1132	0.69119	0.595548	0.750896
TraesCS1A02G361700		chr1A	542170382	542170792		-	Yes	-	16.8358	18.3148	15.645	1.20937	0.818164	0.740944		-	Yes	-	36.4065	39.0979	31.2943	0.764382	0.596426	0.767569
TraesCS1A02G361900		chr1A	542358394	542359124		-	Yes	-	8.53089	9.11855	8.70487	0.992786	0.728644	0.766127		Yes	Yes	Yes	8.85091	9.86548	11.1038	0.810773	0.813805	0.796898
TraesCS1A02G362100		chr1A	542825362	542826549		-	Yes	-	13.7607	14.036	12.0419	0.635614	0.568661	0.645108		Yes	Yes	Yes	8.44545	7.72194	7.48328	0.959261	0.90096	0.85398
TraesCS1A02G363000		chr1A	543928300	543928828		-	Yes	-	10.6666	11.888	10.0235	0.968609	0.677405	0.708574		-	Yes	-	15.2952	15.7637	13.6558	0.750408	0.711303	0.775648
TraesCS1A02G363200		chr1A	543948618	543951807		Yes	Yes	Yes	3.10817	3.17754	3.36167	0.660869	0.791744	0.790909		-	Yes	-	3.55722	3.12852	3.47626	0.690392	0.786075	0.6833
TraesCS1A02G363300		chr1A	543956166	543961830		-	-	-	15.8165	16.5029	18.633	0.283043	0.306355	0.374217		Yes	Yes	Yes	12.1563	11.5913	11.5291	0.548819	0.541961	0.518115
TraesCS1A02G363400		chr1A	543965747	543965959		-	-	-	0.44482	0.493	0.675083	1.53869	1.50579	2.31332		Yes	Yes	Yes	2.17592	1.91586	1.94464	1.29896	0.849371	0.921598
TraesCS1A02G363700		chr1A	544046494	544052618		Yes	Yes	Yes	48.579	51.6052	52.7901	0.458729	0.376311	0.378262		Yes	Yes	Yes	59.3741	61.781	71.4931	0.408855	0.412869	0.363314
TraesCS1A02G363800		chr1A	544054296	544058899		-	Yes	-	56.4769	49.4186	54.3205	0.600099	0.440355	0.473577		Yes	Yes	Yes	26.5298	23.3746	21.8508	0.488456	0.496318	0.512201
TraesCS1A02G364000		chr1A	544176614	544177763		Yes	Yes	Yes	12.0085	13.5636	19.6786	2.383	2.14336	1.72201		Yes	Yes	Yes	116.208	91.2017	84.8248	0.738983	0.734278	0.717382
TraesCS1A02G364200		chr1A	544199764	544204085		-	-	-	13.1314	12.2997	14.7315	0.543465	0.470501	0.480001		-	Yes	-	13.9655	13.5202	13.5096	0.472837	0.502158	0.460673
TraesCS1A02G364500		chr1A	544364546	544368971		-	-	-	13.3539	12.8348	13.2161	0.361747	0.334083	0.356344		-	Yes	-	11.0008	9.77873	10.4078	0.546859	0.541452	0.531523
TraesCS1A02G364600		chr1A	544370915	544376553		Yes	-	-	1.31943	1.26259	1.35563	0.929054	0.824117	0.919878		Yes	-	-	1.84426	1.34686	1.75698	1.77378	0.907214	0.73697
TraesCS1A02G364700		chr1A	544377730	544379003		Yes	-	-	1.59967	1.71865	1.87217	1.01926	0.799961	0.852126		-	Yes	-	6.82626	7.37643	5.93694	0.830098	0.846137	0.858095
TraesCS1A02G365100		chr1A	544465438	544475283		Yes	-	-	2.14982	2.47353	2.19849	1.0313	0.971845	1.39952		-	-	-	-	-	-	-	-	-
TraesCS1A02G365200		chr1A	544486925	544489217		Yes	Yes	Yes	1.23102	1.44768	1.47708	1.47752	1.15895	1.09597		-	-	-	-	-	-	-	-	-
TraesCS1A02G365400		chr1A	544495226	544496670		-	-	-	1.57334	1.54382	1.60787	0.896509	0.667219	0.834952		-	Yes	-	2.45196	3.35495	3.23336	0.825477	0.780917	0.754079
TraesCS1A02G365600		chr1A	544585320	544588835		Yes	-	-	17.0173	17.5553	18.0015	0.36636	0.350989	0.326999		Yes	-	-	13.491	13.2118	15.2969	0.48339	0.371104	0.384447
TraesCS1A02G365900		chr1A	544747971	544749566		Yes	-	-	1.85367	2.00215	1.92205	0.928144	0.864998	0.880196		Yes	-	-	0.868291	1.06234	1.28486	1.20352	1.31066	0.983207
TraesCS1A02G366400		chr1A	545331520	545334637		Yes	Yes	Yes	7.79211	7.48229	7.41958	0.492789	0.469655	0.462545		-	Yes	-	9.03123	8.1354	8.88384	0.529323	0.509319	0.51591
TraesCS1A02G366500		chr1A	545416981	545418748		Yes	-	-	5.34685	5.32015	5.33901	0.471031	0.435041	0.506319		-	-	-	0.794533	0.814105	0.805721	1.67328	1.3837	1.46145
TraesCS1A02G366700		chr1A	545521478	545528022		-	-	-	46.9815	43.9777	43.7266	0.309221	0.261548	0.237901		Yes	Yes	Yes	70.3601	67.7664	60.3251	0.408614	0.405177	0.375334
TraesCS1A02G366800		chr1A	545528450	545534545		Yes	Yes	Yes	2.43132	2.19915	2.55927	0.758631	0.623475	0.693772		-	-	-	-	-	-	-	-	-
TraesCS1A02G366900		chr1A	545647584	545649340		-	Yes	-	2.8135	3.28409	2.64968	1.13784	1.07255	1.01072		-	Yes	-	2.02451	1.78141	1.8661	1.25148	1.22563	1.0822
TraesCS1A02G367000		chr1A	545751852	545753393		Yes	Yes	Yes	4.30508	4.28451	3.64741	0.805706	0.840501	0.654042		-	Yes	-	5.6771	6.09254	5.32838	0.947216	0.950083	0.920946
TraesCS1A02G367100		chr1A	545776964	545778395		-	-	-	0.851801	0.931235	1.07311	0.988137	0.86227	0.925885		-	Yes	-	7.59432	8.00237	7.83298	0.831505	0.85762	0.947111
TraesCS1A02G367200		chr1A	545849620	545851303		Yes	Yes	Yes	1.76151	1.7365	1.83114	0.982243	0.902086	1.84073		Yes	Yes	Yes	12.8724	15.1776	15.46	0.731035	0.709878	0.78396
TraesCS1A02G367300		chr1A	545887964	545891362		Yes	-	-	5.34591	5.35762	6.40316	0.518571	0.474853	0.423881		Yes	Yes	Yes	4.62111	4.57096	4.74203	0.670177	0.738627	0.677927
TraesCS1A02G367900		chr1A	546212417	546212878		-	Yes	-	33.8705	36.6088	33.552	1.09957	0.790418	0.698237		-	Yes	-	99.82	114.027	101.16	0.745032	0.654113	0.741778
TraesCS1A02G368000		chr1A	546216476	546216937		-	Yes	-	11.4753	12.0386	10.5331	0.927752	0.82874	0.671333		-	Yes	-	34.35	39.3746	35.0892	0.776321	0.700959	0.784681
TraesCS1A02G368100		chr1A	546218303	546219527		-	Yes	-	17.096	16.3577	18.3042	0.537327	0.521789	0.502667		Yes	Yes	Yes	22.4602	22.5486	26.2218	0.388949	0.549295	0.498291
TraesCS1A02G368700		chr1A	546512097	546513621		-	-	-	0.553518	0.644118	0.650171	1.05024	1.2211	1.52888		-	Yes	-	1.5445	1.46602	1.51725	1.18476	1.21408	0.759226
TraesCS1A02G368800		chr1A	546514359	546516755		Yes	-	-	7.97933	8.6598	9.59924	0.399387	0.365954	0.367616		-	-	-	6.60979	6.36569	6.26306	0.580371	0.568684	0.452084
TraesCS1A02G369300		chr1A	547016778	547022195		-	-	-	0.686973	0.613394	0.896473	1.13747	1.07217	2.63734		-	Yes	-	1.84234	1.29315	1.71871	1.18753	1.492	1.17142
TraesCS1A02G369400		chr1A	547253498	547258202		Yes	-	-	8.54547	9.27361	11.0728	0.433767	0.386511	0.411908		-	-	-	6.56505	6.34386	7.0395	0.563194	0.566172	0.58918
TraesCS1A02G369600		chr1A	547298439	547304124		Yes	Yes	Yes	120.334	140.919	188.377	0.455364	0.600831	0.439189		Yes	Yes	Yes	37.9061	40.6878	41.3605	0.548065	0.435212	0.501561
TraesCS1A02G369700		chr1A	547311399	547318676		-	-	-	22.7891	21.9711	23.7911	0.328813	0.333571	0.296753		Yes	Yes	Yes	28.4466	27.9628	28.3509	0.444197	0.469861	0.449179
TraesCS1A02G369800		chr1A	547324343	547333822		Yes	Yes	Yes	30.0057	29.3337	29.2235	0.386459	0.374541	0.395905		-	-	-	-	-	0.335283	-	-	2.03519
TraesCS1A02G369900		chr1A	547381612	547384543		-	-	-	11.8031	11.2002	12.6285	0.420809	0.378231	0.381135		-	Yes	-	12.814	12.7278	12.4138	0.444021	0.398763	0.365229
TraesCS1A02G370000		chr1A	547384844	547385630		-	-	-	0.429654	-	0.444017	1.58011	-	1.28392		Yes	-	-	0.697661	0.997815	0.614434	1.56634	1.32086	1.27006
TraesCS1A02G370100		chr1A	547391832	547395833		-	-	-	-	-	-	-	-	-		-	Yes	-	3.38476	3.29693	4.04178	1.09822	1.17712	1.45178
TraesCS1A02G370400		chr1A	547863784	547865124		-	Yes	-	17.7827	19.3263	17.5617	1.01279	1.11009	1.0481		-	Yes	-	11.7638	11.8017	8.93467	1.25029	1.26656	1.47784
TraesCS1A02G370600		chr1A	547886643	547887899		-	Yes	-	28.4049	31.9575	29.1372	1.02096	1.09943	1.01409		-	Yes	-	21.7416	21.9148	18.9079	1.18906	1.03452	1.17021
TraesCS1A02G370700		chr1A	547907223	547908642		-	Yes	-	12.8965	14.2108	12.6161	1.00034	1.09996	1.0767		Yes	Yes	Yes	4.82925	4.5737	3.72093	1.34939	1.30396	1.23927
TraesCS1A02G370800		chr1A	547963976	547968335		-	-	-	13.7481	12.6676	15.3395	0.374249	0.3375	0.471474		-	Yes	-	9.59444	8.36621	10.6064	0.658296	0.665647	0.566559
TraesCS1A02G371000		chr1A	548405015	548405913		-	-	-	-	-	-	-	-	-		Yes	Yes	Yes	2.08155	2.14597	4.22962	1.18882	1.10335	1.1606
TraesCS1A02G371100		chr1A	548437332	548438879		Yes	-	-	0.939643	0.913465	1.21564	1.30939	1.02087	0.913563		Yes	-	-	1.48862	1.34477	1.38285	1.16793	1.15268	1.19656
TraesCS1A02G371600		chr1A	548557987	548564254		Yes	-	-	7.79805	8.81997	8.6076	0.728677	0.668198	0.699529		-	Yes	-	2.39305	1.8494	2.64749	1.02913	1.16315	0.920378
TraesCS1A02G371700		chr1A	548564973	548568222		-	-	-	1.02059	1.24218	1.25086	0.977025	0.747831	0.807485		-	Yes	-	1.91778	1.9761	2.16128	1.10012	1.06206	0.921141
TraesCS1A02G371800		chr1A	548669851	548673633		-	-	-	6.73776	6.64275	6.2046	0.488936	0.376808	0.421378		Yes	Yes	Yes	6.17818	6.23983	6.63967	0.625784	0.493397	0.481823
TraesCS1A02G371900		chr1A	548674143	548676077		Yes	-	-	14.357	14.5569	15.0856	0.408256	0.387469	0.446018		Yes	-	-	29.3355	33.1348	37.6915	0.383234	0.341517	0.367788
TraesCS1A02G372100		chr1A	548733303	548734833		-	-	-	-	-	-	-	-	-		Yes	Yes	Yes	6.41765	5.28307	4.49155	0.64437	0.650728	0.667335
TraesCS1A02G372200		chr1A	548772420	548773661		-	-	-	-	0.462821	-	-	2.36506	-		Yes	Yes	Yes	4.56117	4.27062	3.70484	0.847787	0.737512	0.922895
TraesCS1A02G372300		chr1A	548789228	548790730		Yes	Yes	Yes	10.3884	10.2326	10.542	0.582196	0.599909	0.60806		Yes	Yes	Yes	48.2139	41.1019	37.312	0.383493	0.411051	0.441068
TraesCS1A02G372400		chr1A	548941073	548946209		-	-	-	34.499	30.9038	34.3098	0.386824	0.289339	0.319505		Yes	-	-	39.0554	34.886	32.1283	0.42174	0.41062	0.356431
TraesCS1A02G372900		chr1A	549301444	549303091		-	-	-	-	-	0.446351	-	-	2.58946		Yes	Yes	Yes	8.04663	7.23592	4.35294	0.622793	0.701524	0.747782
TraesCS1A02G373000		chr1A	549312696	549314670		-	Yes	-	11.9844	10.8604	11.5953	0.605707	0.484385	0.600377		-	Yes	-	27.9513	28.2575	29.7081	0.448544	0.454326	0.446796
TraesCS1A02G373100		chr1A	549357850	549360837		Yes	-	-	1.51324	1.72302	1.70392	0.954089	0.742977	0.971007		Yes	Yes	Yes	5.49189	5.28111	4.11961	0.650162	0.667961	0.666839
TraesCS1A02G373200		chr1A	549418214	549421078		Yes	-	-	3.17484	3.17698	3.96829	1.5059	1.55352	1.35653		-	-	-	8.07177	8.57299	7.7951	1.31279	1.39459	1.44233
TraesCS1A02G373300		chr1A	549423942	549427559		-	-	-	8.15401	7.48555	8.64865	0.406005	0.345322	0.336525		-	Yes	-	7.8881	7.85563	8.20711	0.543693	0.49696	0.490692
TraesCS1A02G373800		chr1A	549522962	549524414		-	Yes	-	1.73604	1.96011	1.69742	1.11149	0.760047	0.844186		-	Yes	-	7.14026	7.88245	7.69471	0.618169	0.61866	0.691453
TraesCS1A02G374200		chr1A	549637888	549638532		-	Yes	-	27.6952	31.0682	31.3054	0.725268	0.491545	0.538114		-	Yes	-	100.343	97.9134	93.6244	0.934904	0.829402	0.918206
TraesCS1A02G374300		chr1A	549666495	549666785		Yes	Yes	Yes	5.87394	5.49239	6.71625	1.31225	0.836657	0.892718		-	Yes	-	39.64	34.5535	30.1915	1.26463	1.03449	1.0484
TraesCS1A02G374400		chr1A	549670654	549670950		Yes	Yes	Yes	1.8493	1.9011	3.3973	1.50718	1.07654	0.953652		Yes	Yes	Yes	7.73559	7.70102	8.48016	0.880997	0.840656	0.700114
TraesCS1A02G374500		chr1A	549695442	549695735		Yes	-	-	0.755832	1.06715	1.47292	1.67665	1.62505	1.36549		Yes	Yes	Yes	2.10957	2.89882	5.23199	1.31092	1.20489	1.21254
TraesCS1A02G374800		chr1A	549837796	549847148		-	Yes	-	4.61545	4.24733	5.01347	0.490001	0.497357	0.4977		Yes	Yes	Yes	3.93335	3.75129	4.1318	0.765741	0.801618	0.710893
TraesCS1A02G374900		chr1A	549853049	549857731		-	-	-	0.590299	0.573272	0.602884	1.68889	1.04454	1.17344		Yes	Yes	Yes	1.46359	1.69662	1.87718	1.19407	1.04446	1.13815
TraesCS1A02G375000		chr1A	549931846	549933140		-	-	-	0.886561	1.00349	1.08505	1.12451	1.07215	1.08592		-	Yes	-	1.71792	2.67863	2.11648	0.825947	1.17669	0.91496
TraesCS1A02G375200		chr1A	550109457	550111705		Yes	-	-	7.98034	7.86684	7.01992	0.4423	0.422993	0.530352		Yes	Yes	Yes	7.73665	7.38735	5.73434	0.612434	0.544127	0.548575
TraesCS1A02G375600		chr1A	550311432	550314872		Yes	Yes	Yes	10.3008	10.5815	11.9089	0.814095	0.978606	1.22382		Yes	Yes	Yes	3.59629	3.66615	4.13446	1.199	1.12879	1.01967
TraesCS1A02G375800		chr1A	550342744	550345277		-	Yes	-	57.0525	54.913	53.6415	0.349286	0.347897	0.315651		Yes	Yes	Yes	7.89227	8.59555	9.9683	0.864577	0.524116	0.581846
TraesCS1A02G375900		chr1A	550419211	550422944		-	-	-	13.6246	14.0318	15.3251	0.358693	0.295035	0.34478		-	Yes	-	6.14279	6.00198	7.26025	0.740034	0.595955	0.454981
TraesCS1A02G376400		chr1A	550611490	550616190		-	-	-	41.9717	43.7173	42.7023	0.354257	0.292729	0.281278		Yes	Yes	Yes	6.11433	5.84786	5.478	0.650673	0.785	0.676113
TraesCS1A02G377400		chr1A	550704228	550705323		-	-	-	0.584368	0.489433	0.494005	1.6656	1.34212	1.37561		Yes	-	-	2.59126	2.30647	2.08569	1.05851	0.964214	0.95368
TraesCS1A02G377700		chr1A	550875583	550886316		-	Yes	-	2.45538	2.23694	2.96871	0.722431	0.556614	0.580335		Yes	-	-	1.77399	1.71829	2.2222	1.00604	1.09829	0.761724
TraesCS1A02G377900		chr1A	550967927	550969339		-	-	-	0.880398	0.737889	0.674567	1.40662	1.11234	1.25451		-	Yes	-	10.4461	11.5138	8.98113	0.606046	0.684897	0.543441
TraesCS1A02G378000		chr1A	550969936	550972182		-	Yes	-	48.0176	54.1271	54.4675	0.613328	0.546962	0.587726		-	Yes	-	76.0981	83.8557	81.6662	0.483403	0.435953	0.43078
TraesCS1A02G378500		chr1A	551213062	551214004		Yes	-	-	1.72678	2.19444	1.89542	1.10658	1.04324	1.13499		-	Yes	-	8.45564	9.63605	7.58252	0.840034	1.02882	0.908339
TraesCS1A02G378600		chr1A	551278287	551281179		-	Yes	-	2.30689	2.39632	2.40475	0.759635	0.592437	0.750138		-	-	-	0.553192	0.553464	0.678793	1.29349	1.09094	1.10065
TraesCS1A02G378800		chr1A	551311077	551312770		Yes	-	-	0.707932	0.984374	0.986732	1.10343	1.15015	1.00295		Yes	-	-	0.504235	0.948311	0.945423	1.24597	1.82524	1.02002
TraesCS1A02G378900		chr1A	551313777	551317799		-	-	-	0.731089	0.751247	0.989262	1.00387	1.04784	1.64751		-	Yes	-	6.71703	6.97441	6.23754	0.845477	0.858463	0.921921
TraesCS1A02G379300		chr1A	551484006	551487641		Yes	-	-	7.74733	8.50676	9.55846	0.505326	0.431438	0.401366		Yes	Yes	Yes	8.82359	8.57544	11.1861	0.698708	0.541933	0.526195
TraesCS1A02G379400		chr1A	551493136	551494119		-	Yes	-	2.39494	2.59472	2.42228	0.771033	0.659247	0.748437		-	Yes	-	3.27124	3.13767	3.10507	0.746972	0.615454	0.67603
TraesCS1A02G379500		chr1A	551530360	551533816		Yes	Yes	Yes	5.55073	5.40785	6.1583	0.605998	0.55516	0.425875		-	Yes	-	8.62793	7.43254	9.08131	0.526141	0.518817	0.528118
TraesCS1A02G379700		chr1A	551591836	551593360		-	-	-	1.12553	1.20914	1.24076	0.901235	0.924431	1.13315		Yes	Yes	Yes	8.51823	10.2706	10.0617	0.550659	0.565798	0.508635
TraesCS1A02G379900		chr1A	551606487	551611069		-	Yes	-	3.90243	3.61866	4.32418	0.564102	0.48272	0.690857		-	Yes	-	2.36386	2.25856	2.60805	0.895466	1.32803	0.898131
TraesCS1A02G380700		chr1A	551744256	551746623		-	-	-	2.45594	2.645	2.716	0.940971	0.728393	0.761924		-	Yes	-	4.31649	4.94941	4.65702	0.665416	0.588067	0.525439
TraesCS1A02G380900		chr1A	551874880	551879890		Yes	Yes	Yes	6.67614	6.73975	7.69165	0.776239	0.808406	0.669319		-	Yes	-	20.8141	20.7732	25.4867	0.559614	0.604756	0.647258
TraesCS1A02G381100		chr1A	551980845	551981711		-	-	-	0.681128	0.711624	0.603564	1.20875	0.937739	1.14045		-	Yes	-	1.13499	1.35497	1.27111	1.28671	1.03024	0.992813
TraesCS1A02G381200		chr1A	551982009	551984293		-	-	-	63.1826	67.0036	70.9773	0.240673	0.236406	0.252661		-	Yes	-	68.3283	79.26	81.0492	0.315582	0.303958	0.301923
TraesCS1A02G381400		chr1A	552119048	552119308		-	Yes	-	1.60448	1.50646	1.15374	1.05674	1.09407	1.20635		Yes	Yes	Yes	7.0896	7.6067	5.58199	0.886078	0.983467	0.985138
TraesCS1A02G381500		chr1A	552162788	552168044		Yes	Yes	Yes	19.0859	18.9987	18.2647	0.516363	0.551995	0.476467		Yes	Yes	Yes	15.2031	14.1131	12.282	0.490251	0.488562	0.596058
TraesCS1A02G381800		chr1A	552211319	552213816		Yes	Yes	Yes	3.26733	3.35416	3.7296	0.714433	0.522214	0.707409		-	Yes	-	4.12257	5.27417	4.98138	0.643812	0.668767	0.507768
TraesCS1A02G382100		chr1A	552907080	552908676		-	-	-	1.09564	1.17321	1.28389	0.868279	0.825129	0.692529		-	Yes	-	1.37881	1.84554	1.73273	1.3133	0.931423	0.841114
TraesCS1A02G382200		chr1A	552950102	552952306		-	Yes	-	7.19667	6.82785	5.81888	0.678234	0.59353	0.694854		Yes	Yes	Yes	6.09537	5.93675	7.21146	0.77611	0.705144	0.585895
TraesCS1A02G382800		chr1A	553535726	553542082		-	-	-	11.9465	12.6354	12.1056	0.35949	0.339832	0.445227		-	Yes	-	7.53208	6.66727	7.41433	0.625289	0.512633	0.540108
TraesCS1A02G382900		chr1A	553704158	553707207		-	-	-	3.75871	4.3314	4.26044	0.628865	0.526319	0.643935		Yes	Yes	Yes	3.3521	3.74361	4.12373	0.644389	0.62119	0.557546
TraesCS1A02G383200		chr1A	553983010	553984479		Yes	-	-	8.52009	8.27373	7.61513	0.516769	0.465898	0.52252		-	-	-	-	-	-	-	-	-
TraesCS1A02G383500		chr1A	554061310	554063347		-	Yes	-	22.154	25.2175	26.1661	0.862582	0.785558	0.7087		Yes	Yes	Yes	18.2636	22.043	28.9402	0.772519	0.770237	0.760258
TraesCS1A02G383800		chr1A	554088660	554089513		-	Yes	-	3.278	2.69372	3.07241	0.848716	0.873959	0.86108		-	Yes	-	1.45033	1.94057	1.53608	1.1939	1.2181	1.13922
TraesCS1A02G384000		chr1A	554203927	554208584		Yes	Yes	Yes	5.93316	5.90072	6.83725	1.08956	1.20508	1.28514		-	Yes	-	11.8975	11.001	9.40819	1.28899	1.08811	1.07051
TraesCS1A02G384300		chr1A	554304217	554307414		Yes	Yes	Yes	10.8193	6.97124	7.02496	1.28165	1.26117	1.40129		-	-	-	-	0.677266	0.460057	-	5.49538	2.45139
TraesCS1A02G385500		chr1A	554830347	554835264		-	-	-	0.577935	0.670614	0.588274	1.11471	1.11019	1.33538		Yes	-	-	1.53944	1.52736	1.85767	1.13865	0.951299	0.81838
TraesCS1A02G385600		chr1A	554887656	554890251		-	-	-	5.24914	6.07752	5.07274	0.732124	0.588696	0.641491		Yes	-	-	1.25448	1.34974	1.24568	1.27503	1.36928	1.0114
TraesCS1A02G386300		chr1A	555635269	555637755		-	Yes	-	83.7231	92.5328	96.0062	0.403811	0.354002	0.380234		-	Yes	-	155.978	169.045	167.038	0.396677	0.439865	0.379956
TraesCS1A02G386400		chr1A	555638590	555642520		Yes	-	-	2.81304	2.91957	3.22081	0.654173	0.630871	0.623124		-	Yes	-	2.23567	2.62921	2.60786	0.731037	1.36994	0.686107
TraesCS1A02G387400		chr1A	556087172	556091095		-	-	-	1.33374	1.3661	1.34005	1.49858	1.639	1.62735		-	Yes	-	3.0393	2.86952	2.4476	1.47204	1.20658	1.03213
TraesCS1A02G388000		chr1A	556796077	556800728		Yes	-	-	5.43119	5.64229	6.0506	0.521939	0.460309	0.523903		Yes	Yes	Yes	6.45662	6.66047	6.8529	0.58507	0.803301	0.501898
TraesCS1A02G388400		chr1A	556938246	556945562		Yes	Yes	Yes	26.155	27.6263	30.9231	0.418342	0.402965	0.513589		-	Yes	-	87.4176	79.1008	86.5201	0.52452	0.570377	0.472682
TraesCS1A02G388500		chr1A	556957369	556962862		Yes	-	-	4.34225	5.24129	5.05984	0.700061	0.587771	0.566704		Yes	Yes	Yes	6.12827	6.36435	7.38238	0.938084	0.562817	0.505929
TraesCS1A02G388600		chr1A	557098846	557099720		-	Yes	-	13.4136	15.0397	12.0588	1.18975	0.89998	0.848912		-	Yes	-	16.5599	17.9005	15.5043	0.739444	0.590835	0.657421
TraesCS1A02G388800		chr1A	557116985	557120090		Yes	-	-	2.21337	2.11975	1.84357	1.33236	1.32949	1.35313		Yes	-	-	0.62312	0.771657	0.573102	1.46219	1.35309	1.30733
TraesCS1A02G389100		chr1A	557154343	557156185		-	-	-	5.14125	5.17855	5.75432	0.680363	0.519275	0.602058		Yes	Yes	Yes	5.40182	5.47308	7.62288	0.750358	0.832437	0.649278
TraesCS1A02G389200		chr1A	557190156	557193139		-	-	-	0.385441	0.558792	0.358761	1.53311	1.53721	1.59333		-	Yes	-	4.08355	5.02625	4.98282	0.623132	0.557136	0.642601
TraesCS1A02G389600		chr1A	557491431	557495243		Yes	-	-	2.10751	2.1585	2.54029	0.81251	0.614254	0.694926		Yes	-	-	2.41779	2.80682	2.64758	0.868332	0.875362	0.718569
TraesCS1A02G389800		chr1A	557555895	557559770		-	-	-	-	-	-	-	-	-		Yes	Yes	Yes	11.3995	8.98732	6.18354	0.571948	0.569366	0.559937
TraesCS1A02G390300		chr1A	557947952	557952793		Yes	-	-	1.85009	2.07809	1.61808	0.780978	0.653068	0.76828		-	-	-	0.855281	0.749742	0.770215	2.25001	1.28241	1.15981
TraesCS1A02G390400		chr1A	557953578	557957082		-	-	-	26.1279	25.8331	26.5212	0.40434	0.404273	0.343676		Yes	Yes	Yes	5.80434	4.90294	4.76724	0.624269	0.686961	0.618394
TraesCS1A02G390500		chr1A	557989064	557990130		Yes	Yes	Yes	50.3394	53.8185	46.4515	0.58738	0.567285	0.526217		Yes	Yes	Yes	9.76992	10.9111	13.2824	1.04038	0.767623	0.876141
TraesCS1A02G391000		chr1A	558184883	558189224		-	Yes	-	9.29029	8.94041	9.74088	0.485884	0.457939	0.622552		-	Yes	-	17.6065	14.9691	17.7986	0.710228	0.576695	0.531303
TraesCS1A02G391600		chr1A	558505998	558517659		-	-	-	17.8331	17.5389	19.6824	0.404094	0.294636	0.27041		-	Yes	-	16.9065	16.4032	19.2691	0.522937	0.639708	0.619755
TraesCS1A02G391900		chr1A	558550095	558553987		-	Yes	-	16.7701	17.3122	15.0161	0.97077	0.949367	0.926185		-	Yes	-	150.054	151.443	144.197	0.422008	0.425117	0.481404
TraesCS1A02G392000		chr1A	558590999	558591872		Yes	Yes	Yes	561.661	560.786	494.996	0.284669	0.30434	0.333291		Yes	Yes	Yes	1.35152	2.15633	2.07966	1.87256	1.96184	1.5832
TraesCS1A02G392200		chr1A	558704272	558705248		-	-	-	-	-	-	-	-	-		-	Yes	-	1.80163	2.48433	1.56677	1.25669	1.21504	1.22695
TraesCS1A02G392300		chr1A	558954431	558955874		-	-	-	7.87822	8.35942	7.51607	0.574819	0.510681	0.567155		Yes	Yes	Yes	5.25306	5.48395	5.77111	0.661775	0.60685	0.514336
TraesCS1A02G393000		chr1A	559800433	559800693		-	-	-	-	-	-	-	-	-		Yes	Yes	Yes	3.65132	3.92098	4.29242	1.11898	1.27145	1.22576
TraesCS1A02G393100		chr1A	559836875	559837550		-	-	-	-	-	-	-	-	-		-	Yes	-	4.37724	4.63751	4.89887	1.29347	1.07988	1.07348
TraesCS1A02G393300		chr1A	559881495	559881758		-	-	-	-	-	-	-	-	-		Yes	Yes	Yes	3.71087	3.52149	2.62337	1.57716	1.67891	2.00088
TraesCS1A02G393700		chr1A	560177974	560181992		-	-	-	1.46921	1.53587	1.90982	0.801816	0.683869	0.893178		Yes	Yes	Yes	2.32007	2.03361	2.33416	0.949217	0.998268	0.792395
TraesCS1A02G393900		chr1A	560248619	560249770		Yes	Yes	Yes	12.6901	12.7581	12.2606	0.458451	0.451859	0.505337		Yes	Yes	Yes	16.6331	17.2676	19.9047	0.553762	0.607792	0.591639
TraesCS1A02G394100		chr1A	560310084	560310887		-	-	-	-	-	-	-	-	-		-	Yes	-	5.14386	4.22695	4.57881	0.936278	0.891072	0.749413
TraesCS1A02G394200		chr1A	560314110	560314989		-	-	-	0.553767	0.3895	0.657431	1.73516	1.31788	2.39412		Yes	Yes	Yes	11.6927	14.3667	16.2843	0.793683	0.66293	0.629415
TraesCS1A02G394400		chr1A	560402035	560407035		Yes	-	-	10.127	9.86687	9.99446	0.559071	0.559693	0.570317		-	Yes	-	20.4593	18.2445	18.8319	0.650787	0.585764	0.558697
TraesCS1A02G394500		chr1A	560456487	560463748		-	Yes	-	5.57707	6.71615	7.40721	0.613381	0.466628	0.561874		-	Yes	-	6.30218	6.31709	6.98877	0.502883	0.557708	0.463394
TraesCS1A02G394600		chr1A	560466174	560470146		-	-	-	-	-	-	-	-	-		Yes	Yes	Yes	5.40423	4.13398	3.238	0.891528	0.861199	0.88913
TraesCS1A02G394700		chr1A	560486475	560486738		-	-	-	-	-	-	-	-	-		Yes	-	-	0.852917	0.834508	0.411744	2.48875	2.36995	2.29135
TraesCS1A02G395100		chr1A	560878504	560882077		-	Yes	-	3.50124	3.12521	3.42859	0.804829	0.794236	0.868751		-	Yes	-	2.50295	2.93796	2.34361	0.81612	0.771459	0.769125
TraesCS1A02G395300		chr1A	560960167	560962803		Yes	-	-	5.15149	5.30993	5.2824	0.587902	0.65686	0.641685		Yes	Yes	Yes	2.84512	2.85029	3.47203	1.02015	0.841762	0.790267
TraesCS1A02G395600		chr1A	561335324	561346990		-	Yes	-	7.11525	6.88149	7.36979	0.508423	0.42304	0.45808		-	Yes	-	7.07615	6.40596	7.57908	0.727763	0.820558	0.677668
TraesCS1A02G396000		chr1A	561967125	561976767		Yes	-	-	13.5156	14.567	16.9808	0.379816	0.337166	0.334399		-	Yes	-	17.5556	18.1225	17.448	0.485693	0.446741	0.393717
TraesCS1A02G396200	TaXTH17-A1	chr1A	562042147	562043787		-	Yes	-	103.546	107.545	90.6294	0.365752	0.3702	0.381621		Yes	Yes	Yes	25.7357	27.1415	28.8794	0.410384	0.400329	0.397253
TraesCS1A02G396400		chr1A	562316367	562321517		Yes	-	-	12.5847	13.2295	13.5583	0.370722	0.343593	0.394596		Yes	Yes	Yes	6.55035	6.89475	7.12785	0.6764	0.624063	0.540977
TraesCS1A02G396600		chr1A	562739271	562742144		Yes	-	-	3.22492	3.50275	3.77145	0.748707	0.561395	0.51666		Yes	Yes	Yes	3.83278	3.8394	4.38022	0.965337	0.592317	0.554251
TraesCS1A02G396700		chr1A	562784431	562785955		-	Yes	-	21.5968	24.0931	20.4685	0.58068	0.398121	0.52702		Yes	Yes	Yes	8.63468	8.83576	10.3711	0.688466	0.522653	0.517619
TraesCS1A02G396800		chr1A	562805948	562806817		-	Yes	-	9.19554	8.73157	7.98446	0.728047	0.584739	0.625396		Yes	Yes	Yes	15.8237	17.816	21.087	0.657155	0.594006	0.587146
TraesCS1A02G396900		chr1A	562902344	562903176		-	-	-	105.395	104.74	101.112	0.448276	0.471733	0.443753		-	Yes	-	235.052	242.101	207.562	0.479479	0.435927	0.430357
TraesCS1A02G397000		chr1A	562908419	562912709		-	-	-	2.03461	2.39179	2.61184	0.702191	0.637021	0.528199		Yes	Yes	Yes	4.77417	4.32875	4.06499	0.56855	0.615255	0.486659
TraesCS1A02G397100		chr1A	562912852	562915996		Yes	-	-	4.06361	4.01391	4.90983	0.510386	0.415224	0.519807		-	Yes	-	6.28537	5.81604	5.80721	0.546405	0.533324	0.460104
TraesCS1A02G397200		chr1A	562923034	562923531		-	-	-	0.301298	-	-	1.62921	-	-		Yes	-	-	0.801263	0.93083	0.740476	1.37538	1.42638	1.77292
TraesCS1A02G397300		chr1A	563159275	563162262		-	-	-	24.0211	25.9746	28.3669	0.309442	0.304667	0.279209		-	Yes	-	36.2919	39.0965	37.3615	0.380561	0.337145	0.319497
TraesCS1A02G397400		chr1A	563179574	563181574		-	Yes	-	36.3285	40.5745	39.9862	0.468563	0.425419	0.496447		Yes	Yes	Yes	51.6318	59.1643	60.9977	0.522011	0.53132	0.486588
TraesCS1A02G397500		chr1A	563183471	563184200		-	Yes	-	29.3192	30.7824	28.5324	0.920004	0.841218	0.844959		-	Yes	-	39.3223	40.2969	43.0663	0.858287	0.744272	0.855698
TraesCS1A02G398300		chr1A	563678782	563684009		Yes	-	-	1.62813	1.88262	2.03543	0.661797	0.678079	0.559546		-	-	-	0.470719	-	0.410834	1.40721	-	1.2267
TraesCS1A02G398400		chr1A	563684317	563686065		Yes	Yes	Yes	8.16007	8.5563	8.38905	0.554127	0.42703	0.407887		Yes	Yes	Yes	9.38834	9.9546	11.6753	0.566499	0.408356	0.34936
TraesCS1A02G398900		chr1A	563764608	563766880		-	-	-	0.672016	0.717591	0.690214	1.0345	1.02189	0.959223		Yes	-	-	0.827456	1.1947	1.0393	1.15101	1.01815	0.981364
TraesCS1A02G399500		chr1A	564039745	564040901		-	-	-	-	-	-	-	-	-		Yes	-	-	0.785885	1.14873	1.78324	1.20094	1.27244	0.859303
TraesCS1A02G399600		chr1A	564084739	564087493		-	Yes	-	20.7877	16.72	18.3791	0.580891	0.472384	0.548663		-	-	-	33.3123	31.2249	31.5613	0.383167	0.388147	0.40974
TraesCS1A02G399800		chr1A	564100030	564102644		Yes	Yes	Yes	86.8389	91.7589	94.8171	0.439723	0.357762	0.378058		Yes	-	-	120.723	133.585	146.544	0.311765	0.274551	0.29033
TraesCS1A02G400200		chr1A	564276653	564279542		-	-	-	14.4443	15.965	15.6324	0.444587	0.354182	0.361305		Yes	-	-	11.7675	11.462	10.8778	0.562087	0.493161	0.494937
TraesCS1A02G400300		chr1A	564300854	564310247		-	-	-	30.837	28.3557	31.0387	0.355401	0.247584	0.298075		Yes	-	-	30.9761	30.8814	32.1007	0.451443	0.443069	0.407675
TraesCS1A02G400500		chr1A	564392367	564395626		-	Yes	-	69.8664	76.2482	67.9433	0.377245	0.329425	0.372844		-	-	-	0.517801	0.732168	0.776672	1.8138	1.5591	1.68537
TraesCS1A02G400600		chr1A	564395728	564396899		-	Yes	-	1.29973	1.51189	1.31992	0.907413	0.744402	0.758486		-	Yes	-	2.32127	2.35054	2.39553	1.04359	0.960454	0.869394
TraesCS1A02G400700		chr1A	564396988	564397638		-	-	-	0.840349	1.04292	0.862271	1.11303	0.98156	0.923525		Yes	Yes	Yes	1.94407	2.23095	2.4209	0.89321	0.870895	0.936009
TraesCS1A02G401800		chr1A	565291854	565295194		-	Yes	-	2.03105	2.3352	1.89536	1.22392	1.3795	1.15721		-	Yes	-	23.6216	25.3185	24.1829	0.637358	0.591431	0.452397
TraesCS1A02G401900		chr1A	565420551	565422889		-	-	-	1.15754	1.01025	0.9574	1.07297	0.880636	0.92632		-	Yes	-	6.75794	6.77715	6.22842	0.689343	0.644033	0.638593
TraesCS1A02G402100		chr1A	565990422	565995767		-	Yes	-	4.90326	5.40306	4.29481	0.594125	0.448267	0.548745		-	-	-	-	-	-	-	-	-
TraesCS1A02G402200		chr1A	565996648	566005759		Yes	Yes	Yes	4.28054	4.45186	5.26055	0.507958	0.562381	0.518627		Yes	Yes	Yes	4.84377	4.1082	3.61515	0.884471	0.791335	0.778987
TraesCS1A02G402400		chr1A	566009663	566015714		-	Yes	-	4.46216	4.4639	4.44522	0.790655	0.858705	0.945218		-	-	-	2.04528	1.80779	2.04798	0.972427	1.0259	0.86425
TraesCS1A02G402500		chr1A	566108088	566111919		-	-	-	11.2324	11.9834	11.7978	0.497338	0.41122	0.434951		Yes	Yes	Yes	14.7284	16.9163	19.1683	0.576632	0.505689	0.404932
TraesCS1A02G402700		chr1A	566383800	566387162		Yes	-	-	3.12646	3.68539	3.89178	0.620179	0.520357	0.555455		-	Yes	-	3.03139	2.9877	3.27197	0.888877	0.81676	0.72073
TraesCS1A02G402800		chr1A	566477445	566479620		Yes	-	-	17.12	17.8339	18.5254	0.641916	0.461126	0.515937		-	Yes	-	16.9815	16.3376	20.3586	0.579908	0.508664	0.488811
TraesCS1A02G402900		chr1A	566480047	566483482		-	-	-	21.539	22.0334	24.9835	0.287447	0.242121	0.301553		Yes	-	-	21.2419	21.4894	22.6833	0.407802	0.337627	0.334873
TraesCS1A02G403000		chr1A	566484658	566488261		Yes	Yes	Yes	18.3186	16.4254	15.9036	0.534632	0.467295	0.470181		Yes	Yes	Yes	3.28731	3.21544	2.8916	0.813268	0.879915	0.820018
TraesCS1A02G403100		chr1A	566492106	566492762		-	-	-	4.47923	4.65316	4.71302	0.629601	0.486494	0.53558		-	Yes	-	9.43325	10.0006	10.1296	0.604616	0.529487	0.52154
TraesCS1A02G403200		chr1A	566497332	566501467		Yes	Yes	Yes	4.68372	4.74889	5.47086	0.558031	0.520888	0.507419		-	Yes	-	8.88593	8.4664	8.80956	0.628805	0.771982	0.579393
TraesCS1A02G403300		chr1A	566564178	566564978		Yes	Yes	Yes	1138.22	1073.85	894.268	0.514893	0.442632	0.439028		Yes	Yes	Yes	3.10957	3.95028	4.07093	1.91017	1.87138	1.58277
TraesCS1A02G403400		chr1A	566598210	566603266		Yes	-	-	13.9013	15.2218	16.2676	0.417306	0.375987	0.357015		Yes	-	-	19.6176	20.9343	24.5799	0.436607	0.456266	0.419111
TraesCS1A02G403500		chr1A	566634373	566651752		-	-	-	1.57498	1.66719	1.78034	0.750874	0.691711	0.851905		-	Yes	-	2.40476	2.20033	2.62619	1.0122	0.965299	0.850593
TraesCS1A02G403800		chr1A	566688721	566689723		Yes	Yes	Yes	533.46	574.858	364.827	0.858761	1.09276	0.831174		Yes	Yes	Yes	1.47938	1.81382	1.94335	2.55129	2.0451	1.80827
TraesCS1A02G403900		chr1A	567318284	567327266		-	-	-	17.7848	18.7956	20.0028	0.347973	0.322198	0.333274		-	Yes	-	22.886	22.6243	24.8068	0.491302	0.502169	0.39755
TraesCS1A02G404200		chr1A	567633796	567634895		Yes	Yes	Yes	25.1107	22.4721	17.0133	0.59453	0.656294	0.599582		Yes	Yes	Yes	94.0874	115.298	134.932	0.436278	0.451479	0.392091
TraesCS1A02G404300		chr1A	567967616	567979275		-	Yes	-	3.88854	3.3551	4.16442	0.777851	0.792745	1.07999		Yes	Yes	Yes	1.78532	1.58438	1.55381	1.10917	1.33932	1.34144
TraesCS1A02G404500		chr1A	568008271	568014103		-	-	-	307.653	291.124	307.882	0.274828	0.25452	0.276177		-	Yes	-	447.133	409.517	353.344	0.288427	0.284021	0.236435
TraesCS1A02G404700		chr1A	568108477	568113288		Yes	-	-	3.47409	3.67924	3.93894	0.787538	0.575709	0.623058		Yes	Yes	Yes	4.01779	4.42049	5.69934	0.96954	0.86623	0.662922
TraesCS1A02G405500		chr1A	568399831	568401386		-	-	-	1.06204	1.08993	1.11722	1.03364	0.958802	0.940429		-	Yes	-	2.46471	2.73509	2.90937	0.728859	0.701225	0.795006
TraesCS1A02G405600		chr1A	568413091	568417416		Yes	Yes	Yes	2.86152	1.98056	1.56676	0.903494	0.83725	1.09884		Yes	Yes	Yes	5.84012	6.83437	6.86485	0.936901	0.874327	0.848325
TraesCS1A02G405800		chr1A	568543500	568547764		Yes	Yes	Yes	5.25344	5.03125	4.81665	0.573691	0.553879	0.671171		Yes	Yes	Yes	10.1021	9.16247	7.16916	0.614876	0.591772	0.552105
TraesCS1A02G406200		chr1A	568727578	568730565		-	-	-	12.3654	12.297	12.4523	0.354831	0.3206	0.370297		-	Yes	-	38.2367	36.6663	35.4205	0.484626	0.491356	0.410741
TraesCS1A02G406300		chr1A	568788864	568790654		Yes	Yes	Yes	11.3192	13.2198	18.7783	0.949698	0.87078	0.764271		Yes	Yes	Yes	20.3618	21.0577	21.7093	0.837178	0.851641	0.633925
TraesCS1A02G406500		chr1A	569133127	569134025		-	Yes	-	24.8405	26.2193	20.7169	0.483399	0.399186	0.475147		-	-	-	-	-	-	-	-	-
TraesCS1A02G407600		chr1A	570131664	570140605		-	Yes	-	4.05876	4.37516	4.61731	2.12284	2.2698	2.53204		-	-	-	-	-	-	-	-	-
TraesCS1A02G407700		chr1A	570142270	570145875		-	Yes	-	2.51984	2.20777	2.88548	1.02947	0.77316	0.673797		-	Yes	-	1.48739	1.56769	1.93924	1.19227	0.982276	0.910256
TraesCS1A02G407800		chr1A	570153572	570155654		-	-	-	0.382334	-	-	1.82917	-	-		-	Yes	-	9.21932	9.23089	6.48524	0.747104	0.692963	0.818418
TraesCS1A02G408900		chr1A	570448983	570453239		Yes	Yes	Yes	3.68578	3.1614	3.13117	2.38676	2.45234	1.94244		-	-	-	0.64072	0.660207	0.594332	2.71933	2.62602	2.43185
TraesCS1A02G409100		chr1A	570855520	570857641		Yes	-	-	1.51432	1.32945	1.61378	0.815272	0.729975	0.88444		-	Yes	-	1.73785	1.27368	1.52358	1.12853	1.33275	1.03325
TraesCS1A02G409200		chr1A	570859448	570861748		-	Yes	-	10.6585	12.3636	12.6184	0.586198	0.679795	0.605675		-	Yes	-	12.8238	12.6973	13.711	0.791791	0.859519	0.847085
TraesCS1A02G409600		chr1A	571269579	571281317		Yes	-	-	1.8078	1.71097	2.09613	0.870233	0.674342	0.928643		Yes	Yes	Yes	3.08967	2.90982	2.9517	1.23574	0.96925	0.764551
TraesCS1A02G409700		chr1A	571281311	571282877		Yes	-	-	6.38813	6.38863	6.21359	0.494447	0.501086	0.432134		Yes	Yes	Yes	3.13977	2.73967	2.01821	1.02567	0.822682	0.687013
TraesCS1A02G409800		chr1A	571286613	571291700		-	-	-	19.0803	18.0708	20.1621	0.707825	0.57434	0.58028		Yes	Yes	Yes	15.4727	13.1245	8.71643	0.585225	0.651112	0.546523
TraesCS1A02G409900		chr1A	571344494	571348249		-	Yes	-	1.70373	1.64798	1.79392	1.06013	0.694809	0.870579		Yes	-	-	1.02702	1.06166	1.23392	1.0563	1.02072	1.062
TraesCS1A02G410300		chr1A	571653043	571654578		-	-	-	8.55384	8.5663	9.57471	0.598377	0.532394	0.507153		Yes	-	-	0.89371	1.03022	0.994043	1.16234	1.04829	0.84876
TraesCS1A02G410500		chr1A	571724650	571725888		-	-	-	2.88743	3.34474	3.1244	0.727637	0.678651	0.692088		Yes	Yes	Yes	2.59841	2.68181	3.03478	0.962571	0.819258	0.751129
TraesCS1A02G411100		chr1A	571893799	571895896		Yes	Yes	Yes	5.48039	5.6567	6.27975	0.831847	0.707241	0.710875		Yes	Yes	Yes	1.27967	1.13364	0.995313	2.08264	1.92046	1.30643
TraesCS1A02G411200	TaPP2C6-A1	chr1A	571986755	571989201		Yes	Yes	Yes	3.25092	3.89239	6.45226	1.35947	1.49392	1.06156		-	-	-	0.966792	0.899767	0.834231	1.09989	1.26085	1.07786
TraesCS1A02G411500		chr1A	572019892	572023146		-	-	-	3.6717	3.85608	4.1433	0.544049	0.446833	0.556802		Yes	Yes	Yes	6.81843	5.81313	6.05418	0.716085	0.614721	0.510044
TraesCS1A02G411600		chr1A	572206778	572212965		-	-	-	41.2547	43.7068	49.1464	0.881252	0.760711	0.813924		-	Yes	-	136.233	115.265	118.898	0.692957	0.705572	0.741639
TraesCS1A02G411700	TaNF-YB11-A1	chr1A	572334701	572336969		Yes	-	-	5.52895	6.05965	6.49151	0.534467	0.53426	0.461649		Yes	Yes	Yes	7.31642	8.42894	8.91655	0.570311	0.747891	0.463769
TraesCS1A02G411900		chr1A	572350605	572354408		Yes	-	-	69.3184	70.8566	72.8491	0.384812	0.33296	0.366806		Yes	-	-	30.1465	30.8091	34.8256	0.418863	0.333742	0.3858
TraesCS1A02G412200		chr1A	572575530	572578542		-	-	-	-	-	-	-	-	-		-	Yes	-	3.75273	3.92545	3.3939	0.749241	0.710017	0.661098
TraesCS1A02G412900		chr1A	573060338	573065094		-	-	-	92.2292	98.5501	92.4758	0.296029	0.268622	0.28368		Yes	Yes	Yes	52.0411	56.2893	64.4763	0.416401	0.365649	0.338187
TraesCS1A02G413000		chr1A	573068179	573070666		-	-	-	206.661	218.581	228.444	0.254815	0.252483	0.260853		Yes	-	-	231.219	253.606	263.828	0.228894	0.210113	0.233043
TraesCS1A02G413300		chr1A	573230410	573233761		-	Yes	-	15.2994	13.8383	15.4846	0.572497	0.420627	0.563556		-	-	-	4.38547	3.842	4.33765	0.744271	0.612896	0.618537
TraesCS1A02G413400		chr1A	573242423	573243985		-	-	-	-	-	-	-	-	-		Yes	-	-	1.70345	1.80719	1.76538	1.19861	1.07012	1.02387
TraesCS1A02G413600		chr1A	573319120	573323634		Yes	-	-	1.39523	1.41372	1.69833	1.02259	0.782112	0.809327		-	-	-	-	-	-	-	-	-
TraesCS1A02G413700		chr1A	573327648	573333885		-	-	-	32.9093	34.0722	30.7678	0.461326	0.441226	0.451254		-	Yes	-	8.63925	8.91145	8.41005	0.52162	0.677976	0.550587
TraesCS1A02G414000		chr1A	573636921	573637609		Yes	Yes	Yes	20.6456	18.3778	14.0407	0.807024	0.871396	0.972175		Yes	Yes	Yes	6.0234	5.38018	3.56951	0.869389	0.698593	0.812587
TraesCS1A02G414200		chr1A	573694503	573695537		-	-	-	0.363556	0.463686	0.462151	1.82123	2.55671	1.96259		Yes	Yes	Yes	1.53785	1.34044	0.722917	1.27829	1.24565	1.49388
TraesCS1A02G414500		chr1A	573925775	573927514		-	-	-	0.833381	0.804287	0.554533	1.2324	1.27366	1.16813		Yes	-	-	1.59372	1.6269	1.94452	1.1698	0.991629	0.709508
TraesCS1A02G414600		chr1A	573930526	573931411		-	Yes	-	2.04442	1.82129	1.8593	0.831261	0.862606	0.826365		-	Yes	-	2.65821	2.58778	3.40084	1.26881	1.2678	1.14832
TraesCS1A02G414700		chr1A	573944098	573944601		Yes	-	-	1.20694	1.13198	0.838726	1.19611	1.30715	1.21502		-	Yes	-	6.99485	6.94368	8.15175	0.872033	0.768408	0.709916
TraesCS1A02G415100		chr1A	574331573	574332076		Yes	Yes	Yes	3.05703	2.75316	2.98158	1.04083	1.19635	1.29168		-	-	-	0.366514	-	-	1.8182	-	-
TraesCS1A02G415200		chr1A	574336004	574341165		-	Yes	-	54.432	52.1177	51.3035	0.490935	0.423547	0.443899		-	-	-	-	-	-	-	-	-
TraesCS1A02G415300		chr1A	574351875	574357108		-	-	-	1.45664	1.76915	2.00429	0.785779	0.630164	0.705422		Yes	-	-	1.07175	0.842788	1.04279	1.33523	1.47355	0.987985
TraesCS1A02G415800		chr1A	574498551	574499992		-	-	-	2.14286	2.35251	2.28961	0.956788	0.724452	0.754421		Yes	-	-	1.43855	2.07183	1.43816	0.913555	0.888571	0.88209
TraesCS1A02G416000		chr1A	574639871	574644410		-	-	-	14.0106	14.159	16.9746	0.369562	0.333554	0.323568		Yes	Yes	Yes	16.3333	16.513	17.6615	0.432602	0.407936	0.325151
TraesCS1A02G416100		chr1A	574657931	574658773		Yes	Yes	Yes	1.87583	2.06129	1.84357	0.724836	0.86749	0.863081		-	Yes	-	6.76431	7.25212	6.81918	0.678711	0.729426	0.624803
TraesCS1A02G416200		chr1A	574665507	574669595		-	Yes	-	2.89729	3.37928	3.66687	0.689968	0.558125	0.641604		Yes	Yes	Yes	13.6681	12.8882	12.2342	0.560212	0.575236	0.544678
TraesCS1A02G416500		chr1A	574826362	574832131		-	-	-	0.482244	0.773981	0.565762	1.65719	1.11991	1.15702		Yes	-	-	1.24261	1.44608	1.22888	0.915693	1.08606	1.04136
TraesCS1A02G417400		chr1A	575361796	575370366		-	-	-	4.93393	5.20176	5.53068	0.427156	0.634468	0.470932		-	Yes	-	9.1213	8.53039	8.10938	0.515149	0.704475	0.519482
TraesCS1A02G417700		chr1A	575465417	575466779		Yes	Yes	Yes	1.84244	1.61736	1.73518	1.09609	0.825872	0.919713		-	Yes	-	4.07187	3.47594	3.46913	1.37129	0.840252	0.792203
TraesCS1A02G417800		chr1A	575581119	575586523		-	-	-	0.568029	0.594079	0.580397	1.3844	1.84824	1.69926		Yes	Yes	Yes	3.67946	3.25945	2.97525	0.877305	1.06532	0.843639
TraesCS1A02G418300		chr1A	575736809	575741899		Yes	Yes	Yes	51.8856	53.2323	66.7644	0.33624	0.386483	0.34441		-	Yes	-	50.9802	48.5147	54.468	0.487865	0.512154	0.501052
TraesCS1A02G418400		chr1A	575776654	575778167		Yes	-	-	2.37197	2.33819	2.38194	0.71314	0.672327	0.734097		Yes	-	-	2.84138	3.20084	3.54036	0.715982	0.733044	0.602976
TraesCS1A02G418500		chr1A	575798303	575800246		-	Yes	-	6.15019	8.29684	7.85031	1.12063	0.853734	0.779519		Yes	Yes	Yes	18.6935	15.4646	14.6986	0.866063	0.887002	0.726347
TraesCS1A02G418700		chr1A	575867347	575870849		-	Yes	-	2.97727	2.45784	2.53251	0.840519	0.699443	0.893592		-	-	-	-	-	-	-	-	-
TraesCS1A02G418800		chr1A	575872791	575873468		Yes	Yes	Yes	163.526	161.706	169.929	0.355642	0.360017	0.477213		Yes	-	-	0.550737	0.586564	0.737798	2.42933	2.33581	2.47937
TraesCS1A02G418900		chr1A	575966635	575968846		Yes	-	-	1.30108	1.62388	1.40368	0.868104	0.889071	1.13141		-	-	-	1.25713	1.21326	0.817882	1.26778	1.25697	1.28458
TraesCS1A02G419000		chr1A	576065343	576065888		Yes	Yes	Yes	3.10794	2.77404	1.69279	1.39175	0.998604	1.45736		-	-	-	-	-	-	-	-	-
TraesCS1A02G419100		chr1A	576077576	576078344		Yes	Yes	Yes	6.97667	6.10858	5.5468	0.789563	0.769202	0.822498		-	-	-	-	-	-	-	-	-
TraesCS1A02G419200		chr1A	576138618	576139247		Yes	Yes	Yes	6.33969	6.51709	5.93675	0.836408	0.978194	0.973408		-	-	-	-	-	-	-	-	-
TraesCS1A02G419400		chr1A	576219770	576222349		Yes	-	-	3.93397	5.08559	5.37419	0.613848	0.553412	0.471597		-	Yes	-	4.90438	6.04137	5.99111	0.600502	0.537623	0.618928
TraesCS1A02G419500		chr1A	576342095	576351038		Yes	-	-	3.33002	3.39997	4.42317	0.636717	0.620818	0.577229		-	Yes	-	4.3072	4.78471	4.95369	0.869285	0.847633	0.696944
TraesCS1A02G419600		chr1A	576370933	576375876		Yes	Yes	Yes	5.59927	6.42344	9.22806	0.582841	0.562447	0.606451		Yes	Yes	Yes	1.6511	1.95715	3.2957	0.847075	0.736278	0.725474
TraesCS1A02G420000		chr1A	576609051	576615791		-	-	-	2.54293	2.69499	2.79885	0.836864	0.700154	0.793916		Yes	Yes	Yes	2.87602	2.91468	3.21739	0.881178	0.772812	0.748578
TraesCS1A02G420100		chr1A	576636089	576637427		-	Yes	-	3.44684	4.03453	4.05991	0.640517	0.721513	0.806626		Yes	Yes	Yes	13.04	13.7462	15.3272	0.525188	0.553998	0.47356
TraesCS1A02G420300		chr1A	576777828	576784337		Yes	-	-	12.534	13.3133	13.73	0.368222	0.313256	0.321411		-	-	-	17.3313	18.3307	17.6177	0.411023	0.395247	0.376999
TraesCS1A02G420500		chr1A	576892591	576896980		-	-	-	11.8137	12.6031	13.9415	0.352052	0.315848	0.269876		-	Yes	-	19.7563	18.4807	20.8735	0.467122	0.484449	0.449134
TraesCS1A02G420600		chr1A	577079067	577080932		-	-	-	0.434733	0.526671	0.540868	1.51059	1.20262	1.55829		Yes	Yes	Yes	5.96483	6.13755	7.05884	0.740193	0.637188	0.53764
TraesCS1A02G420700		chr1A	577274617	577276090		-	-	-	-	-	-	-	-	-		Yes	-	-	1.54079	1.53025	1.11554	0.844573	0.857221	1.24197
TraesCS1A02G420800		chr1A	577307622	577313842		-	-	-	17.94	18.198	18.4483	0.343595	0.329701	0.303074		Yes	Yes	Yes	31.4882	28.7337	32.0076	0.441717	0.40601	0.36671
TraesCS1A02G420900		chr1A	577461313	577464912		Yes	-	-	26.6649	24.6425	24.397	0.665481	0.54229	0.58945		Yes	-	-	3.11814	3.0369	3.08521	0.687123	0.685326	0.642087
TraesCS1A02G421000		chr1A	577468378	577474524		Yes	-	-	9.53844	9.47636	9.2716	0.480897	0.392535	0.469715		Yes	Yes	Yes	10.2317	10.512	11.8907	0.591623	0.530613	0.475673
TraesCS1A02G421100		chr1A	577508919	577509161		-	-	-	-	-	-	-	-	-		Yes	Yes	Yes	2.67991	2.50741	2.36927	1.03219	1.20236	0.99806
TraesCS1A02G421400		chr1A	577634184	577637276		Yes	Yes	Yes	5.83673	4.31684	3.41362	1.08058	1.21873	1.1955		-	-	-	0.655567	0.42825	0.495857	2.03384	2.24507	1.9324
TraesCS1A02G421600		chr1A	577718596	577720353		Yes	-	-	1.58827	1.39383	1.14269	0.996889	0.72275	0.997627		Yes	Yes	Yes	2.5621	2.06253	2.02335	1.24686	0.909732	1.01931
TraesCS1A02G422100		chr1A	577840627	577846994		-	-	-	4.91313	4.60338	4.94259	0.592108	0.492788	0.56579		Yes	Yes	Yes	4.59667	4.26773	4.34929	0.899666	0.672098	0.52978
TraesCS1A02G422400		chr1A	577920509	577927598		Yes	-	-	5.69681	5.89239	6.86892	0.474699	0.413498	0.734359		-	Yes	-	6.64817	6.17129	6.05268	0.66036	0.691031	0.622752
TraesCS1A02G422600		chr1A	578014400	578017642		Yes	Yes	Yes	9.7547	8.30011	7.67288	0.556407	0.530206	0.538146		Yes	Yes	Yes	9.26988	8.42575	8.33182	0.566439	0.654761	0.568256
TraesCS1A02G422700		chr1A	578021877	578025030		Yes	Yes	Yes	3.41833	2.66597	1.68601	0.901029	1.18836	1.03142		Yes	Yes	Yes	4.24382	4.18537	3.83521	0.908423	0.961412	0.820226
TraesCS1A02G422800		chr1A	578196408	578199395		Yes	Yes	Yes	3.79449	3.10641	1.986	0.836578	0.903872	0.981346		Yes	Yes	Yes	2.43179	1.96467	1.62484	0.946262	1.07549	0.849462
TraesCS1A02G422900		chr1A	578206147	578208705		Yes	Yes	Yes	35.4826	26.5842	21.6284	0.783093	0.773747	0.815911		-	Yes	-	20.0921	18.6905	21.5707	0.784994	0.72141	0.664665
TraesCS1A02G423100		chr1A	578516213	578522072		-	Yes	-	5.92205	6.35858	5.5368	0.497254	0.51831	0.475296		Yes	Yes	Yes	9.61417	10.3751	12.3882	0.663438	0.687879	0.709183
TraesCS1A02G423400		chr1A	578812352	578814154		-	-	-	0.790316	0.760632	0.828661	1.09035	1.04577	0.953439		Yes	Yes	Yes	16.7928	18.6341	18.0698	0.501227	0.521842	0.388319
TraesCS1A02G423700		chr1A	578911157	578912277		-	Yes	-	5.07319	4.82347	4.46309	0.560726	0.431739	0.546745		-	-	-	-	-	-	-	-	-
TraesCS1A02G423800		chr1A	578922141	578922999		Yes	Yes	Yes	205.196	205.319	194.362	0.615707	0.70143	0.624203		-	Yes	-	363.526	401.6	350.774	0.78254	0.826072	0.79235
TraesCS1A02G424000		chr1A	578939458	578941241		-	Yes	-	4.61343	4.64002	4.81667	0.834971	0.602876	0.765563		Yes	-	-	0.818707	0.608449	0.933867	1.56728	1.60489	1.2784
TraesCS1A02G424100		chr1A	579171915	579173746		-	Yes	-	20.4307	24.2339	23.6221	0.626776	0.594225	0.705095		Yes	Yes	Yes	121.185	106.144	86.119	0.486757	0.439619	0.429484
TraesCS1A02G424200		chr1A	579296187	579299659		-	-	-	21.1943	20.9426	22.4725	0.410329	0.356487	0.419378		-	Yes	-	18.7686	17.3377	18.1863	0.537662	0.562433	0.460358
TraesCS1A02G424300		chr1A	579300105	579303032		-	Yes	-	7.97795	9.83042	9.01247	0.681185	0.514524	0.564243		Yes	-	-	1.49548	1.66843	1.64974	0.854398	0.806494	0.78712
TraesCS1A02G424500		chr1A	579574092	579576186		-	-	-	-	-	-	-	-	-		Yes	Yes	Yes	0.848545	0.790935	0.711749	2.01439	1.63344	1.37524
TraesCS1A02G424800		chr1A	579836169	579837583		-	-	-	2.76769	2.84683	2.97376	0.581618	0.533485	0.634008		Yes	Yes	Yes	3.52598	2.98214	3.01276	0.86415	0.842047	0.688015
TraesCS1A02G425100		chr1A	580182936	580189531		Yes	Yes	Yes	5.81732	5.98471	5.70801	0.522125	0.486564	0.479957		Yes	Yes	Yes	7.54733	6.42721	5.07472	0.631277	0.699023	0.527393
TraesCS1A02G425200		chr1A	580420426	580425201		-	-	-	3.58939	4.36062	4.19272	0.604521	0.595026	0.585497		Yes	Yes	Yes	13.2935	14.4397	16.8014	0.551153	0.555999	0.480955
TraesCS1A02G425300		chr1A	580433890	580436597		-	-	-	-	-	-	-	-	-		Yes	-	-	0.800986	0.780997	1.13455	1.90796	1.45348	1.51531
TraesCS1A02G425400		chr1A	580444570	580446533		-	-	-	4.61256	5.06538	3.84511	0.70941	0.603982	0.679764		-	Yes	-	13.2	14.4193	13.0671	0.510824	0.488828	0.466257
TraesCS1A02G425700		chr1A	580491858	580497051		-	-	-	3.61847	4.02859	4.4913	0.531949	0.489663	0.47069		-	Yes	-	3.72252	3.28081	4.52625	0.884614	0.649682	0.631464
TraesCS1A02G426300		chr1A	580988115	580990175		Yes	-	-	1.30266	1.45639	1.74556	0.90603	0.778436	0.915846		Yes	Yes	Yes	7.99588	9.0809	12.4523	0.682107	0.671228	0.575946
TraesCS1A02G426700		chr1A	581437944	581440095		Yes	-	-	4.11965	4.84873	3.94256	1.20534	1.20246	1.07368		-	-	-	-	-	-	-	-	-
TraesCS1A02G426800		chr1A	581506401	581507597		Yes	-	-	3.53649	2.7273	3.71339	1.12788	0.973936	1.13626		Yes	Yes	Yes	1.95253	1.60328	1.34506	1.22711	1.18098	1.25896
TraesCS1A02G426900		chr1A	581540647	581543570		Yes	-	-	3.54481	3.99281	3.9518	0.57992	0.509441	0.588821		-	-	-	-	-	-	-	-	-
TraesCS1A02G427000		chr1A	581570171	581576506		Yes	-	-	10.1133	11.1391	11.3779	0.377256	0.384772	0.340435		Yes	Yes	Yes	9.7682	10.4374	11.9529	0.49467	0.525203	0.404937
TraesCS1A02G427100		chr1A	581580561	581586056		-	-	-	2.80548	3.25082	3.3235	0.679173	0.637342	0.606873		-	Yes	-	4.70982	4.05956	4.67524	0.746776	0.567579	0.658753
TraesCS1A02G427200		chr1A	581589503	581593802		Yes	-	-	2.22098	2.28995	1.99643	0.949589	0.958969	1.04361		-	-	-	-	-	-	-	-	-
TraesCS1A02G427400		chr1A	581828761	581832944		Yes	-	-	7.97586	8.42419	6.89192	0.604716	0.645123	0.563369		Yes	Yes	Yes	3.21467	3.89954	4.59699	0.923239	0.918519	0.722546
TraesCS1A02G427500		chr1A	581867727	581870592		Yes	-	-	7.07329	7.1418	8.12013	0.448122	0.443915	0.373133		-	Yes	-	6.51567	6.76242	6.44896	0.52092	0.512636	0.5064
TraesCS1A02G428100		chr1A	582219350	582221953		Yes	-	-	0.677071	0.926903	1.18178	1.09419	1.12194	0.974998		-	-	-	-	0.359752	0.559962	-	2.57369	1.75223
TraesCS1A02G428400		chr1A	582276530	582279794		-	-	-	19.7668	18.7692	18.4762	0.458549	0.40871	0.446116		-	Yes	-	24.9498	24.7555	29.6786	0.648109	0.722028	0.726181
TraesCS1A02G428700		chr1A	582417095	582428862		-	-	-	23.6268	23.757	28.1408	0.283304	0.261256	0.414931		Yes	Yes	Yes	21.9103	20.4946	20.2227	0.535921	0.549167	0.503921
TraesCS1A02G429500		chr1A	582747331	582751435		-	-	-	-	-	-	-	-	-		-	Yes	-	1.90898	1.98577	1.52337	0.964934	1.08187	0.902981
TraesCS1A02G429700		chr1A	582825345	582829643		-	-	-	-	-	-	-	-	-		-	Yes	-	15.7613	17.3543	13.9563	0.541123	0.632582	0.5886
TraesCS1A02G429800		chr1A	582841107	582843003		-	-	-	-	-	-	-	-	-		Yes	Yes	Yes	2.21541	3.15017	3.09079	1.14603	0.948735	0.850399
TraesCS1A02G430000		chr1A	582854683	582856208		-	-	-	-	-	-	-	-	-		Yes	Yes	Yes	1.70158	1.91941	2.32904	1.01075	1.11935	1.12399
TraesCS1A02G430200		chr1A	582861749	582863708		-	-	-	0.615454	0.600179	0.81256	1.55078	1.51184	1.48768		Yes	Yes	Yes	4.12619	4.4539	5.83072	0.897602	0.88108	0.812178
TraesCS1A02G430400		chr1A	582864940	582872617		-	Yes	-	3.2259	3.5524	3.54341	0.600478	0.504918	0.592828		-	Yes	-	4.82869	4.00795	4.74728	0.841852	0.670647	0.759168
TraesCS1A02G431000		chr1A	583363295	583365876		-	-	-	3.82441	3.9297	4.5095	0.61913	0.550044	0.555708		Yes	-	-	3.55449	3.6059	4.08077	0.895605	0.726999	0.566176
TraesCS1A02G431300		chr1A	583587305	583587663		-	-	-	1.32945	1.35119	1.64519	1.08782	1.21342	1.03804		Yes	Yes	Yes	6.91151	7.64717	9.50868	0.867949	0.83249	0.757665
TraesCS1A02G431400		chr1A	583604338	583605519		-	Yes	-	1.0078	1.28781	1.13618	1.69285	1.70987	1.83592		Yes	Yes	Yes	0.808954	0.849493	0.990488	1.96262	2.47297	2.21354
TraesCS1A02G431500		chr1A	583659688	583664019		Yes	Yes	Yes	3.51766	3.63081	3.66492	0.527562	0.485498	0.596623		-	-	-	0.584538	0.519819	0.509304	1.81695	1.83987	1.46571
TraesCS1A02G431600		chr1A	583892368	583895373		Yes	-	-	3.535	4.21208	4.30996	0.578429	0.704677	0.560907		-	-	-	-	-	-	-	-	-
TraesCS1A02G432200		chr1A	584083815	584086467		Yes	-	-	1.01726	1.04735	1.04425	1.13678	0.981814	0.908943		-	-	-	-	-	-	-	-	-
TraesCS1A02G432800		chr1A	584373361	584375173		Yes	Yes	Yes	2.34339	2.76311	2.59199	0.72196	0.646135	0.742986		-	-	-	0.711146	0.805048	0.830479	1.47486	1.82944	1.30955
TraesCS1A02G432900		chr1A	584468935	584480601		-	-	-	7.39189	7.40791	8.50336	0.473726	0.394001	0.33264		-	Yes	-	5.37775	4.60925	6.00329	0.718432	0.735743	0.635706
TraesCS1A02G433000		chr1A	584506329	584509916		-	Yes	-	15.3188	18.5349	18.6775	0.61233	0.508898	0.464641		Yes	-	-	17.279	19.1515	21.5654	0.477806	0.393106	0.347055
TraesCS1A02G433300		chr1A	584671566	584674812		Yes	Yes	Yes	11.5492	10.57	11.5538	0.56634	0.521594	0.528518		-	-	-	6.88085	7.39836	7.82157	0.591463	0.642311	0.476392
TraesCS1A02G433400		chr1A	584676043	584676930		-	-	-	2.00393	1.73076	1.86452	0.895431	0.827049	0.690995		Yes	-	-	0.998582	1.10735	1.44928	1.17062	1.23212	1.01174
TraesCS1A02G433500		chr1A	584679526	584684832		Yes	-	-	4.27851	4.49137	4.51716	1.00493	0.658695	0.725181		Yes	Yes	Yes	2.66952	2.49347	2.70706	0.984011	0.732093	0.810749
TraesCS1A02G433700		chr1A	584778668	584779039		-	Yes	-	2.62248	2.55131	2.87369	2.00015	2.40044	2.08333		-	-	-	-	-	-	-	-	-
TraesCS1A02G435000		chr1A	585625902	585628146		Yes	Yes	Yes	11.9581	12.6048	11.0484	0.445255	0.525852	0.459264		Yes	Yes	Yes	51.8341	61.8378	60.2859	0.806154	0.782701	0.718047
TraesCS1A02G435100		chr1A	585690525	585691316		Yes	-	-	1.74527	1.81996	2.49118	1.23924	0.986365	1.1878		-	Yes	-	3.33803	3.1853	2.97926	1.23992	1.32208	1.18336
TraesCS1A02G436100		chr1A	586512310	586512804		Yes	-	-	1.55425	1.79894	1.97065	1.22472	1.21889	1.4206		-	-	-	0.815475	0.720902	0.523286	1.66894	2.26152	1.63781
TraesCS1A02G436500		chr1A	586717508	586720673		-	Yes	-	4.30531	4.75777	4.05639	0.782013	0.639152	0.79981		-	-	-	-	-	-	-	-	-
TraesCS1A02G437300		chr1A	586937504	586938750		-	-	-	0.496632	0.704861	0.473295	1.47465	1.10402	1.23741		-	Yes	-	4.16588	4.54709	3.38976	0.838069	0.843346	0.771153
TraesCS1A02G437400		chr1A	586951828	586956008		-	-	-	9.58928	9.1904	9.79596	0.467361	0.398793	0.523589		-	Yes	-	12.1189	11.4338	11.3119	0.54252	0.500647	0.46657
TraesCS1A02G437500		chr1A	586993497	586999171		-	-	-	31.1345	32.2234	31.2495	0.371374	0.351259	0.329516		Yes	Yes	Yes	3.79211	3.76127	4.28476	0.757422	0.66564	0.618669
TraesCS1A02G437600		chr1A	587359674	587362070		-	-	-	13.217	13.5884	14.3166	0.55602	0.563321	0.539259		Yes	Yes	Yes	36.0485	34.1009	36.2608	0.580062	0.514634	0.576485
TraesCS1A02G438600		chr1A	588297015	588303557		-	-	-	22.6884	22.3048	24.8229	0.403645	0.360929	0.396692		-	Yes	-	32.9092	31.5164	36.0176	0.568354	0.629797	0.60332
TraesCS1A02G439100		chr1A	588491432	588493673		Yes	-	-	8.12312	8.48044	9.55164	0.462591	0.484484	0.427449		-	Yes	-	5.39392	4.88644	5.99611	0.82398	0.715621	0.601055
TraesCS1A02G439300		chr1A	588899646	588903928		-	Yes	-	45.2457	49.3028	53.2819	0.538824	0.489832	0.527173		Yes	-	-	49.1832	49.5871	54.4438	0.506205	0.507839	0.504884
TraesCS1A02G439400		chr1A	588905536	588910909		Yes	Yes	Yes	54.1391	57.0471	54.9001	0.912931	0.900273	0.768642		-	Yes	-	61.3054	51.5797	57.6457	1.11802	1.0181	1.05935
TraesCS1A02G439500		chr1A	589020797	589033857		Yes	Yes	Yes	7.26653	7.62301	8.72616	0.557914	0.521508	0.455506		-	Yes	-	11.0767	10.4561	11.4606	0.689486	0.800481	0.705497
TraesCS1A02G439600		chr1A	589038754	589039627		Yes	-	-	3.61344	3.92629	4.02051	0.771578	0.670573	0.738643		-	Yes	-	3.11774	3.46611	3.32664	0.748191	1.09096	0.709156
TraesCS1A02G440200		chr1A	589440075	589444328		-	-	-	35.3983	33.26	36.3188	0.480117	0.388287	0.470145		Yes	-	-	19.6235	17.6386	18.1557	0.562479	0.661848	0.654648
TraesCS1A02G441100		chr1A	589791043	589792882		Yes	-	-	7.58492	7.12058	7.48833	0.621149	0.45027	0.55795		-	Yes	-	26.0705	25.3229	23.1633	0.492368	0.447476	0.450725
TraesCS1A02G441400		chr1A	590000975	590006215		Yes	Yes	Yes	8.59115	8.37918	9.78627	0.753159	0.605126	0.597369		-	Yes	-	6.43291	6.09535	6.26074	0.800732	0.823839	0.843821
TraesCS1A02G441500		chr1A	590249635	590250714		Yes	Yes	Yes	1.99359	1.99321	1.8855	0.894189	0.758064	0.998503		-	-	-	-	-	-	-	-	-
TraesCS1A02G441600		chr1A	590342119	590348478		Yes	Yes	Yes	25.612	25.7698	29.2341	0.493899	0.45742	0.44509		-	Yes	-	19.9814	18.6987	22.2545	0.756828	0.759543	0.723786
TraesCS1A02G441800		chr1A	590546517	590553218		-	Yes	-	16.5919	15.8315	18.5931	0.596414	0.447877	0.472702		-	Yes	-	9.83422	9.21386	12.1873	0.733945	0.757044	0.670718
TraesCS1A02G442300		chr1A	590995483	590997454		-	Yes	-	22.5642	22.6728	15.6982	0.793803	0.648521	0.823162		Yes	Yes	Yes	9.98868	11.3375	13.4543	0.738492	0.821173	0.621021
TraesCS1A02G442400		chr1A	591089070	591102227		-	-	-	13.2567	12.6414	14.0523	0.422504	0.412225	0.438391		Yes	Yes	Yes	9.62237	8.45771	9.48464	0.686668	0.694435	0.648431
TraesCS1A02G443100		chr1A	591605951	591610806		-	Yes	-	2.5253	2.49861	2.34484	0.851552	0.639641	0.779309		Yes	-	-	1.77235	1.48585	1.54387	1.17436	0.871051	0.972725
TraesCS1A02G443200		chr1A	591611106	591615811		Yes	-	-	6.08962	6.5726	6.71706	0.714473	0.517437	0.503263		-	Yes	-	7.14442	6.10032	6.33687	0.714619	0.765894	0.717253
TraesCS1A02G443400		chr1A	591926034	591930394		-	-	-	18.2755	19.3136	18.8445	0.440229	0.4067	0.389838		Yes	Yes	Yes	19.1245	16.9761	20.2889	0.559856	0.438423	0.496499
TraesCS1A02G443600		chr1A	591948406	591953951		Yes	-	-	3.424	3.43888	3.75185	0.766717	0.56304	0.675075		-	Yes	-	5.13723	5.73309	5.8665	0.662233	0.578665	0.603375
TraesCS1A02G443700		chr1A	591954192	591955918		-	-	-	5.45559	5.12971	5.52115	0.617952	0.633979	0.622274		Yes	Yes	Yes	6.67305	7.64877	8.7484	0.670293	0.728615	0.638315
TraesCS1A02G443900		chr1A	592087337	592091359		-	Yes	-	40.0301	34.7471	44.924	1.18184	1.2323	1.6947		Yes	Yes	Yes	37.9369	30.1293	27.3145	1.02771	1.25093	0.95922
TraesCS1A02G444200		chr1A	592308531	592312286		-	Yes	-	23.8571	23.0914	25.1325	0.604538	0.549916	0.44657		Yes	Yes	Yes	5.22777	6.02611	8.88764	0.810799	0.699205	0.6232
TraesCS1A02G444300		chr1A	592313029	592316609		-	Yes	-	25.4747	27.8382	29.7038	1.01124	0.960472	0.905136		Yes	Yes	Yes	21.8048	22.4809	22.6652	1.17235	0.995185	1.02065
TraesCS1A02G444800		chr1A	592757181	592759061		-	-	-	17.6616	17.2569	18.1954	0.376946	0.323824	0.395526		Yes	-	-	12.0748	11.7435	13.2296	0.464696	0.438501	0.420038
TraesCS1A02G444900		chr1A	592829982	592831432		-	-	-	-	-	-	-	-	-		Yes	-	-	0.876469	1.02693	0.701779	1.53697	1.46334	1.59446
TraesCS1A02G445500		chr1A	593279894	593287280		-	-	-	9.30253	9.88026	11.1281	0.613133	0.638748	0.599123		-	Yes	-	9.34026	9.11733	8.97958	0.749361	0.755899	0.718943
TraesCS1A02G445600		chr1A	593295227	593301920		Yes	-	-	2.46514	2.93747	3.6306	1.02752	0.889621	0.906621		Yes	Yes	Yes	4.44554	4.3572	3.82319	1.16639	1.15664	1.10075
TraesCS1A02G445700		chr1A	593395820	593400047		Yes	Yes	Yes	15.8114	16.7982	18.0162	0.829053	0.624418	0.641273		Yes	Yes	Yes	13.2927	14.2253	19.7475	0.586359	0.50594	0.404211
TraesCS1A02G445800		chr1A	593403273	593406438		Yes	-	-	7.96927	8.03934	8.62902	0.419749	0.386783	0.487275		Yes	Yes	Yes	4.86701	5.46977	6.07054	0.68622	0.636967	0.62664
TraesCS1A02G445900		chr1A	593547874	593552166		-	-	-	19.6841	19.7116	20.472	0.482821	0.404517	0.403759		-	Yes	-	26.3683	24.2602	26.5562	0.625766	0.650243	0.65726
TraesCS1A02G446000		chr1A	593788496	593791000		Yes	-	-	2.47226	2.75287	3.00628	0.621971	0.592922	0.574366		Yes	Yes	Yes	4.27393	4.39689	5.30208	0.715778	0.690595	0.638598
TraesCS1B02G000600		chr1B	1198799	1199794		Yes	Yes	Yes	86.706	91.7225	76.4149	0.783582	0.787053	0.773025		Yes	-	-	1.00318	1.24038	0.958694	1.45716	1.1054	1.25746
TraesCS1B02G000800		chr1B	1203582	1207214		-	Yes	-	15.7317	14.3222	17.1912	1.2672	1.03525	1.10931		Yes	Yes	Yes	9.29255	8.71438	9.42237	1.16382	1.12462	1.08282
TraesCS1B02G001000		chr1B	1248713	1255880		Yes	Yes	Yes	3.70235	3.6086	3.69062	0.924598	0.922202	1.01719		-	-	-	1.36175	0.983181	0.994283	1.35976	1.25082	1.18048
TraesCS1B02G001100		chr1B	1258800	1260681		Yes	Yes	Yes	24.3797	24.8257	24.9554	0.833778	0.807842	0.789262		Yes	Yes	Yes	22.4146	24.9774	28.3243	0.912094	0.838285	0.825685
TraesCS1B02G001500		chr1B	1416127	1418511		Yes	-	-	2.17209	2.30798	2.39016	0.980693	1.01485	0.931147		-	Yes	-	4.17148	4.97261	5.59712	1.07056	0.967703	0.972487
TraesCS1B02G001600		chr1B	1419308	1422174		Yes	-	-	6.71545	6.85468	6.99745	0.855029	0.864453	0.859999		-	-	-	1.43389	1.36346	1.42915	1.42401	1.53007	1.25286
TraesCS1B02G001700		chr1B	1423557	1426829		Yes	Yes	Yes	3.24814	2.51792	2.42414	1.47004	1.42026	1.47482		Yes	Yes	Yes	2.76886	2.69103	2.46773	1.43155	1.555	1.14164
TraesCS1B02G001800		chr1B	1430072	1436355		-	Yes	-	12.1472	11.3428	13.128	1.01915	0.906617	0.89011		-	Yes	-	17.1102	15.4929	18.2659	1.10947	1.01623	1.01543
TraesCS1B02G001900		chr1B	1469939	1473067		-	-	-	0.41779	-	-	1.6557	-	-		Yes	Yes	Yes	2.57736	2.57498	1.96271	1.15059	1.43465	1.03802
TraesCS1B02G002000		chr1B	1522754	1534577		-	-	-	0.516528	0.609263	0.694071	1.53114	1.50603	1.41298		Yes	-	-	0.800797	0.6889	0.795663	1.67513	1.703	1.92226
TraesCS1B02G004100		chr1B	2354630	2357674		Yes	Yes	Yes	12.9331	11.6692	10.3691	1.97486	2.51777	1.7629		-	-	-	-	-	-	-	-	-
TraesCS1B02G005600		chr1B	3655656	3658361		Yes	-	-	6.6773	7.25142	7.88641	0.851155	0.845352	0.762484		-	Yes	-	13.31	14.1188	12.8038	0.884333	0.777002	0.73361
TraesCS1B02G007100		chr1B	4097642	4099049		-	Yes	-	2.43801	2.04291	2.0331	1.89037	2.29368	1.61789		-	-	-	-	-	-	-	-	-
TraesCS1B02G007700		chr1B	4222340	4225375		Yes	Yes	Yes	3.93556	4.46276	5.09009	1.08443	1.02589	1.0103		-	Yes	-	5.38571	5.71951	4.69599	1.19803	1.36185	1.15649
TraesCS1B02G007800		chr1B	4320651	4326770		-	-	-	1.2576	1.08289	1.31158	1.17347	0.891222	1.16647		-	Yes	-	2.55343	1.78682	2.1199	1.38569	1.13122	0.879555
TraesCS1B02G007900		chr1B	4340022	4343180		Yes	-	-	1.91163	1.91953	2.16226	1.29064	1.20729	1.21817		-	Yes	-	2.63435	2.53374	3.04092	1.27547	1.36147	1.25618
TraesCS1B02G008000		chr1B	4345220	4352718		-	Yes	-	6.58027	6.09121	6.69791	1.08216	1.00985	0.95411		Yes	-	-	9.60953	9.05958	9.29826	1.02683	0.917476	0.911561
TraesCS1B02G008200		chr1B	4475908	4479190		-	Yes	-	6.97591	6.10494	6.95949	1.14874	1.19327	1.1755		Yes	-	-	9.32624	8.47951	8.4645	1.23614	1.27093	1.23405
TraesCS1B02G011100		chr1B	5157094	5160358		Yes	Yes	Yes	46.1236	48.8068	43.977	0.838081	0.835373	0.800795		Yes	-	-	4.47017	4.81493	5.07216	0.990513	0.864466	0.874694
[truncated: 45,113 more rows]

## Sheet: Supplemental Table 5
Supplemental Table 5. The enriched Gene Ontology terms for population-transcriptome gene clusters
Tissue	Cluster	GO term	Description	GeneRatio	BgRatio	EnrichFold	P-value	P.adjust	Count	GeneID
Root	C1	GO:0031118	rRNA pseudouridine synthesis	5/2776	12/103203	15.4904	9.48803e-06	0.000198736	5	TraesCS6B02G254000/TraesCS6A02G289600/TraesCS6B02G319800/TraesCS6D02G207200/TraesCS6D02G269300
Root	C1	GO:0042788	polysomal ribosome	71/2776	168/103203	15.7117	3.26952e-65	2.53388e-62	71	TraesCS4B02G190000/TraesCS5D02G174700/TraesCS7A02G278700/TraesCS7B02G159700/TraesCS2D02G178300/TraesCS3A02G247600/TraesCS3A02G372600/TraesCS3B02G405000/TraesCS4B02G260600/TraesCS4D02G123700/TraesCS5A02G279100/TraesCS5A02G288400/TraesCS5B02G278700/TraesCS5D02G296200/TraesCS5D02G431700/TraesCS7A02G261600/TraesCS7A02G356300/TraesCS1D02G114100/TraesCS1A02G277500/TraesCS1A02G286300/TraesCS1B02G286500/…
Root	C1	GO:0005853	eukaryotic translation elongation factor 1 complex	9/2776	21/103203	15.9329	1.59649e-09	1.09172e-07	9	TraesCS2B02G196100/TraesCS7A02G362900/TraesCS2A02G125200/TraesCS2A02G169800/TraesCS2B02G147700/TraesCS2D02G128300/TraesCS2D02G177300/TraesCS7B02G266300/TraesCS7D02G360200
Root	C1	GO:0034513	box H/ACA snoRNA binding	9/2776	12/103203	27.8827	1.4882e-12	1.82109e-10	9	TraesCS6B02G254000/TraesCS3A02G321500/TraesCS3B02G343500/TraesCS3D02G309800/TraesCS4A02G154000/TraesCS6A02G289600/TraesCS6B02G319800/TraesCS6D02G207200/TraesCS6D02G269300
Root	C2	GO:0045597	positive regulation of cell differentiation	8/4355	36/103203	5.26613	0.000104645	0.00395624	8	TraesCS5D02G277000/TraesCS5B02G269200/TraesCS5A02G269000/TraesCS3A02G312800/TraesCS5A02G217900/TraesCS5B02G216900/TraesCS5D02G225800/TraesCS6B02G403400
Root	C2	GO:0090698	post-embryonic plant morphogenesis	5/4355	21/103203	5.64228	0.00154034	0.0264211	5	TraesCS1A02G222500/TraesCS1B02G235800/TraesCS1D02G224100/TraesCS7A02G466000/TraesCS7D02G453600
Root	C2	GO:0035107	appendage morphogenesis	4/4355	15/103203	6.31936	0.0029721	0.0413972	4	TraesCS4D02G220000/TraesCS3A02G127100/TraesCS3D02G128300/TraesCS4B02G219600
Root	C2	GO:2000023	regulation of lateral root development	5/4355	11/103203	10.7716	4.98006e-05	0.00220966	5	TraesCS3A02G407700/TraesCS3D02G402900/TraesCS1B02G275600/TraesCS1D02G265100/TraesCS3B02G440600
Root	C2	GO:0010171	body morphogenesis	6/4355	12/103203	11.8488	4.17192e-06	0.000386424	6	TraesCS6A02G203400/TraesCS2A02G097800/TraesCS2D02G097200/TraesCS4A02G078400/TraesCS4B02G234400/TraesCS4D02G235600
Root	C3	GO:0032153	cell division site	10/6115	30/103203	5.62567	5.29556e-06	0.000176922	10	TraesCS4B02G094400/TraesCS3A02G192900/TraesCS3D02G199200/TraesCS3B02G223600/TraesCS3B02G268400/TraesCS4A02G257200/TraesCS4B02G057300/TraesCS4D02G057500/TraesCS5A02G111700/TraesCS7D02G507400
Root	C3	GO:0031929	TOR signaling	11/6115	33/103203	5.62567	1.7888e-06	7.5899e-05	11	TraesCS2B02G121500/TraesCS6B02G241500/TraesCS4B02G170700/TraesCS4A02G134300/TraesCS5A02G149200/TraesCS5B02G134400/TraesCS1B02G241900/TraesCS1D02G197500/TraesCS4B02G137700/TraesCS5B02G147900/TraesCS5D02G143600
Root	C3	GO:0071367	cellular response to brassinosteroid stimulus	6/6115	17/103203	5.9566	0.000302336	0.00382174	6	TraesCS4A02G225500/TraesCS4D02G087800/TraesCS3A02G388800/TraesCS3B02G419900/TraesCS3D02G380800/TraesCS4B02G090700
Root	C3	GO:0048585	negative regulation of response to stimulus	8/6115	22/103203	6.1371	2.27825e-05	0.000543068	8	TraesCS4D02G177000/TraesCS2D02G245600/TraesCS3A02G175600/TraesCS2A02G228000/TraesCS2A02G243300/TraesCS2A02G591300/TraesCS2D02G562900/TraesCS4A02G111500
Root	C3	GO:0031669	cellular response to nutrient levels	6/6115	16/103203	6.32888	0.000205959	0.00287462	6	TraesCS4D02G223300/TraesCS5A02G149200/TraesCS2B02G520900/TraesCS4B02G222700/TraesCS5B02G147900/TraesCS5D02G143600
Root	C3	GO:0071333	cellular response to glucose stimulus	8/6115	21/103203	6.42934	1.5295e-05	0.000395582	8	TraesCS7A02G488600/TraesCS3D02G259300/TraesCS2B02G309500/TraesCS3B02G292200/TraesCS5A02G440400/TraesCS5D02G447500/TraesCS7B02G391800/TraesCS7D02G475100
Root	C3	GO:0010364	regulation of ethylene biosynthetic process	7/6115	18/103203	6.56329	4.54342e-05	0.000931291	7	TraesCS6D02G335000/TraesCS1D02G187300/TraesCS2A02G591300/TraesCS2D02G562900/TraesCS4A02G111500/TraesCS7A02G060700/TraesCS7A02G343200
Root	C3	GO:0009884	cytokinin receptor activity	4/6115	10/103203	6.75081	0.00193576	0.0162965	4	TraesCS3A02G433200/TraesCS3B02G469000/TraesCS3D02G426600/TraesCS6A02G312500
Root	C3	GO:0009921	auxin efflux carrier complex	6/6115	15/103203	6.75081	0.00013553	0.00211417	6	TraesCS6B02G337300/TraesCS7A02G492400/TraesCS7B02G095500/TraesCS7B02G398100/TraesCS7D02G191600/TraesCS7D02G478800
Root	C3	GO:0032008	positive regulation of TOR signaling	5/6115	12/103203	7.03209	0.000405946	0.00477127	5	TraesCS5A02G149200/TraesCS5B02G134400/TraesCS4A02G328700/TraesCS5B02G147900/TraesCS5D02G143600
Root	C3	GO:0071363	cellular response to growth factor stimulus	5/6115	11/103203	7.67137	0.000248974	0.00334423	5	TraesCS2B02G121500/TraesCS4B02G170700/TraesCS4A02G134300/TraesCS2D02G565600/TraesCS2B02G595600
Root	C3	GO:0030242	autophagy of peroxisome	10/6115	22/103203	7.67137	1.76754e-07	1.05629e-05	10	TraesCS5A02G054400/TraesCS5B02G062000/TraesCS5D02G065700/TraesCS6A02G149000/TraesCS6A02G360100/TraesCS6B02G177000/TraesCS6B02G393000/TraesCS6D02G138400/TraesCS6D02G343100/TraesCS7B02G115500
Root	C3	GO:0004425	indole-3-glycerol-phosphate synthase activity	6/6115	10/103203	10.1262	7.36438e-06	0.00023146	6	TraesCS2A02G335200/TraesCS7D02G501700/TraesCS2B02G348500/TraesCS2D02G329500/TraesCS5A02G169500/TraesCS5D02G173900
Root	C4	GO:0009685	gibberellin metabolic process	7/2038	46/103203	7.70599	3.16306e-05	0.0010986	7	TraesCS6B02G175100/TraesCS7A02G508800/TraesCS7D02G497400/TraesCS2B02G396000/TraesCS2D02G375300/TraesCS6B02G225200/TraesCS7D02G497800
Root	C4	GO:0005227	calcium activated cation channel activity	6/2038	39/103203	7.79067	0.000109894	0.00292801	6	TraesCS2B02G271900/TraesCS3A02G019900/TraesCS1D02G029500/TraesCS1A02G029300/TraesCS1D02G200300/TraesCS2D02G252800
Root	C4	GO:0005432	calcium:sodium antiporter activity	5/2038	32/103203	7.9124	0.000386015	0.00764507	5	TraesCS5D02G139200/TraesCS3D02G148000/TraesCS5A02G134100/TraesCS5A02G453900/TraesCS7A02G183100
Root	C4	GO:0015743	malate transport	6/2038	37/103203	8.21179	8.09847e-05	0.00225022	6	TraesCS3D02G188000/TraesCS5A02G263100/TraesCS5B02G261500/TraesCS5B02G261800/TraesCS5B02G262500/TraesCS5D02G270600
Root	C4	GO:0071423	malate transmembrane transport	8/2038	46/103203	8.80684	3.05385e-06	0.000156309	8	TraesCS3D02G188000/TraesCS5A02G263100/TraesCS5B02G261500/TraesCS5B02G261800/TraesCS5B02G262500/TraesCS5B02G300300/TraesCS5D02G270600/TraesCS5D02G307000
Root	C4	GO:0035725	sodium ion transmembrane transport	14/2038	80/103203	8.86189	5.86563e-10	7.60577e-08	14	TraesCS5D02G139200/TraesCS5D02G039900/TraesCS3D02G188000/TraesCS4A02G145300/TraesCS4A02G298400/TraesCS4B02G015200/TraesCS4D02G013400/TraesCS5A02G031700/TraesCS5A02G134100/TraesCS5A02G263100/TraesCS5B02G261500/TraesCS5B02G261800/TraesCS5B02G262500/TraesCS5D02G270600
Root	C4	GO:0010482	regulation of epidermal cell division	5/2038	27/103203	9.37766	0.000167939	0.00403261	5	TraesCS4A02G404000/TraesCS4D02G301900/TraesCS5A02G488500/TraesCS5B02G502200/TraesCS5D02G503400
Root	C4	GO:0010601	positive regulation of auxin biosynthetic process	3/2038	16/103203	9.49488	0.00355211	0.0401117	3	TraesCS2A02G084000/TraesCS2B02G098500/TraesCS2D02G082000
Root	C4	GO:0009819	drought recovery	22/2038	117/103203	9.52193	1.61972e-15	5.25059e-13	22	TraesCS6A02G222800/TraesCS6D02G212400/TraesCS2B02G398400/TraesCS7D02G206200/TraesCS2A02G381100/TraesCS2B02G224300/TraesCS2D02G377400/TraesCS2D02G377600/TraesCS2D02G377500/TraesCS1B02G122800/TraesCS1D02G039300/TraesCS1D02G103500/TraesCS2A02G196400/TraesCS2A02G196700/TraesCS2A02G212900/TraesCS2A02G380900/TraesCS2A02G381000/TraesCS2B02G398000/TraesCS2D02G204400/TraesCS2D02G218700/TraesCS4A02G401300/…
Root	C4	GO:0015707	nitrite transport	6/2038	22/103203	13.8107	3.34802e-06	0.000166972	6	TraesCS6B02G044200/TraesCS6A02G030800/TraesCS6A02G031100/TraesCS6B02G044100/TraesCS6B02G044300/TraesCS6D02G035900
Root	C4	GO:1990351	transporter complex	6/2038	14/103203	21.7026	1.54321e-07	1.11168e-05	6	TraesCS6B02G044200/TraesCS6A02G030800/TraesCS6A02G031100/TraesCS6B02G044100/TraesCS6B02G044300/TraesCS6D02G035900
Root	C4	GO:0010360	negative regulation of anion channel activity	9/2038	12/103203	37.9795	9.35924e-14	2.60053e-11	9	TraesCS3A02G362200/TraesCS3B02G394600/TraesCS3D02G355900/TraesCS4A02G094300/TraesCS4B02G210100/TraesCS4D02G210900/TraesCS5A02G183600/TraesCS5B02G182000/TraesCS5D02G188600
Shoot	C1	GO:0010118	stomatal movement	12/1373	379/103203	2.37993	0.00537985	0.0404989	12	TraesCS2A02G098300/TraesCS2A02G163800/TraesCS5D02G336300/TraesCS6B02G066200/TraesCS5B02G330700/TraesCS2A02G106500/TraesCS2A02G150600/TraesCS2A02G453300/TraesCS2B02G189600/TraesCS2B02G474600/TraesCS4B02G171100/TraesCS4D02G173100
Shoot	C1	GO:0004364	glutathione transferase activity	15/1092	345/62343	2.4822	0.00129	0.0135	15	TraesCS3A02G437400/TraesCS2D02G304500/TraesCS3A02G309100/TraesCS1B02G194300/TraesCS1A02G102800/TraesCS1A02G186100/TraesCS1A02G186700/TraesCS1B02G194100/TraesCS1B02G194700/TraesCS1D02G189800/TraesCS1D02G190300/TraesCS1D02G191100/TraesCS3D02G369600/TraesCS5A02G143500/TraesCS5B02G142500
Shoot	C1	GO:1902584	enhancing response to water deprivation	7/1035	112/59197	3.5747	0.00363	0.0329	7	TraesCS5B02G491200/TraesCS4D02G181100/TraesCS5A02G468300/TraesCS5B02G480900/TraesCS4A02G124900/TraesCS4D02G329400/TraesCS4B02G332700
Shoot	C1	GO:0015979	photosynthesis	29/1035	461/59197	3.59796	4.7e-09	4.68e-07	29	TraesCS3B02G413700/TraesCS1A02G392000/TraesCS2A02G114400/TraesCS3A02G381000/TraesCS5A02G457500/TraesCS6A02G307700/TraesCS2D02G115200/TraesCS4A02G226900/TraesCS4B02G089500/TraesCS4D02G086400/TraesCS5D02G265500/TraesCS2A02G220400/TraesCS3B02G061700/TraesCS3B02G168000/TraesCS4A02G355600/TraesCS6A02G086300/TraesCS1A02G171000/TraesCS1A02G326100/TraesCS1B02G420100/TraesCS1D02G400100/TraesCS2D02G226000/…
Shoot	C1	GO:0031098	stress-activated protein kinase signaling cascade	11/1373	175/103203	4.72472	2.62155e-05	0.000638639	11	TraesCS1A02G367200/TraesCS1B02G385100/TraesCS1B02G385000/TraesCS2D02G498100/TraesCS1A02G367000/TraesCS3D02G256400/TraesCS1D02G372400/TraesCS2A02G498000/TraesCS3B02G289500/TraesCS3D02G256500/TraesCS3D02G256600
Shoot	C1	GO:0080168	abscisic acid transport	6/1373	44/103203	10.2499	2.51367e-05	0.000620982	6	TraesCS3B02G248500/TraesCS3A02G218000/TraesCS3D02G234300/TraesCS7A02G391000/TraesCS7D02G386500/TraesCS7D02G386600
Shoot	C1	GO:0009819	drought recovery	21/1373	117/103203	13.4913	8.08038e-18	1.57478e-15	21	TraesCS1D02G103500/TraesCS2A02G381100/TraesCS2D02G204700/TraesCS1B02G048300/TraesCS1B02G122800/TraesCS1D02G039300/TraesCS2A02G196400/TraesCS2A02G196700/TraesCS2A02G212900/TraesCS2A02G380900/TraesCS2B02G224000/TraesCS2B02G224300/TraesCS2B02G398300/TraesCS2B02G398400/TraesCS2D02G204400/TraesCS2D02G218700/TraesCS2D02G377400/TraesCS2D02G377500/TraesCS2D02G377600/TraesCS6A02G296700/TraesCS6B02G258600
Shoot	C2	GO:0034599	cellular response to oxidative stress	16/2903	218/103203	2.60921	0.000504425	0.0141054	16	TraesCS2A02G437700/TraesCS6D02G186800/TraesCS7D02G272500/TraesCS1B02G094700/TraesCS7B02G036800/TraesCS7D02G249200/TraesCS1D02G194000/TraesCS2B02G359300/TraesCS3A02G418400/TraesCS3D02G516800/TraesCS5A02G168600/TraesCS5B02G165400/TraesCS5D02G172900/TraesCS6A02G372100/TraesCS7A02G135700/TraesCS7A02G250500
Shoot	C2	GO:0010427	abscisic acid binding	9/2903	91/103203	3.51598	0.00107522	0.0239217	9	TraesCS2B02G550200/TraesCS2B02G105300/TraesCS4A02G114400/TraesCS1A02G191700/TraesCS1B02G145800/TraesCS2A02G446700/TraesCS2D02G445700/TraesCS2D02G522500/TraesCS5A02G090600
Shoot	C2	GO:0010109	regulation of photosynthesis	11/2903	64/103203	6.11024	1.6141e-06	0.000122995	11	TraesCS1D02G116600/TraesCS2D02G251800/TraesCS4D02G096200/TraesCS5A02G424400/TraesCS5D02G432900/TraesCS2A02G580800/TraesCS4B02G107500/TraesCS5A02G030400/TraesCS5B02G426500/TraesCS5D02G038600/TraesCS3A02G161300
Shoot	C2	GO:0030912	response to deep water	6/2903	24/103203	8.88762	4.28771e-05	0.00207444	6	TraesCS1B02G060900/TraesCS4A02G212800/TraesCS6B02G298500/TraesCS4B02G103000/TraesCS4D02G099600/TraesCS6A02G271300
Shoot	C2	GO:0050891	multicellular organismal water homeostasis	4/2903	12/103203	11.8502	0.000258018	0.00854823	4	TraesCS2B02G184500/TraesCS2B02G335400/TraesCS2D02G314900/TraesCS2A02G398100
Shoot	C2	GO:1901031	regulation of response to ROS species	6/2087	9/59197	18.9098	1.46e-07	2.55e-05	6	TraesCS6D02G186800/TraesCS7D02G412000/TraesCS5A02G168600/TraesCS5B02G165400/TraesCS5D02G172900/TraesCS7A02G419200
Shoot	C3	GO:0009788	inhibition of ABA-activated signaling pathway	16/2042	319/103203	2.53493	0.000729393	0.0146048	16	TraesCS3B02G277900/TraesCS6B02G163100/TraesCS7A02G264100/TraesCS1D02G263800/TraesCS4A02G094300/TraesCS7A02G364400/TraesCS3D02G249000/TraesCS1A02G263700/TraesCS1A02G411200/TraesCS3A02G075000/TraesCS3A02G237800/TraesCS3B02G089500/TraesCS3D02G238000/TraesCS5B02G182000/TraesCS5D02G129400/TraesCS5D02G188600
Shoot	C3	GO:0071215	cellular response to abscisic acid stimulus	12/2042	192/103203	3.15876	0.000492271	0.0113355	12	TraesCS1A02G169300/TraesCS6B02G421800/TraesCS5A02G065500/TraesCS6A02G382600/TraesCS6B02G421700/TraesCS6D02G367300/TraesCS2B02G596600/TraesCS2D02G055000/TraesCS3A02G034600/TraesCS6A02G382400/TraesCS6B02G421500/TraesCS6D02G367200
Shoot	C3	GO:0015250	water channel activity	12/2042	155/103203	3.91279	6.72592e-05	0.00299535	12	TraesCS4A02G410800/TraesCS6D02G389400/TraesCS2B02G396700/TraesCS3B02G608500/TraesCS5D02G347600/TraesCS2B02G396800/TraesCS3A02G535300/TraesCS4D02G308800/TraesCS6A02G222100/TraesCS6A02G405700/TraesCS6D02G212900/TraesCS6D02G389500
Shoot	C3	GO:0030104	water homeostasis	5/2042	38/103203	6.65002	0.000880132	0.0164738	5	TraesCS4A02G410800/TraesCS5D02G039900/TraesCS3B02G608500/TraesCS3A02G535300/TraesCS4D02G308800
Shoot	C3	GO:0071470	cellular response to osmotic stress	9/2042	68/103203	6.68914	7.87934e-06	0.000616738	9	TraesCS6B02G421800/TraesCS7A02G465500/TraesCS6A02G382600/TraesCS7D02G421800/TraesCS6B02G421700/TraesCS6D02G367300/TraesCS6A02G382400/TraesCS6B02G421500/TraesCS6D02G367200
Shoot	C3	GO:0055129	L-proline biosynthetic process	5/1476	14/59197	14.3237	1.59e-05	0.00212	5	TraesCS1D02G280700/TraesCS3A02G363700/TraesCS3D02G357200/TraesCS5A02G375000/TraesCS3B02G395900
Shoot	C3	GO:0009415	response to water	18/1476	31/59197	23.2876	1.9e-21	2.03e-18	18	TraesCS3D02G390200/TraesCS4A02G250900/TraesCS4D02G063100/TraesCS5A02G369900/TraesCS5A02G369800/TraesCS5B02G372100/TraesCS5D02G379200/TraesCS5D02G379300/TraesCS6A02G350500/TraesCS6A02G350600/TraesCS6A02G350700/TraesCS6B02G383500/TraesCS6B02G383600/TraesCS6B02G383800/TraesCS6D02G332900/TraesCS6D02G333000/TraesCS6D02G333100/TraesCS6D02G333600
Shoot	C4	GO:0010115	regulation of abscisic acid biosynthetic process	3/1039	14/59197	12.2089	0.0017	0.021	3	TraesCS3B02G476000/TraesCS7D02G308300/TraesCS7B02G211600
Shoot	C4	GO:0010440	stomatal lineage progression	5/1039	18/59197	15.8264	1.17e-05	0.000421	5	TraesCS5D02G065500/TraesCS3B02G476000/TraesCS7D02G308300/TraesCS5D02G065300/TraesCS7B02G211600
Shoot	C4	GO:0010338	leaf formation	2/1039	6/59197	18.9917	0.00441	0.0362	2	TraesCS7A02G277700/TraesCS5B02G086900
Shoot	C4	GO:1901671	activation of superoxide dismutase activity	5/1039	9/59197	31.6528	1.96e-07	1.21e-05	5	TraesCS5D02G219500/TraesCS7A02G161000/TraesCS7B02G066000/TraesCS5B02G211200/TraesCS7D02G162300

## Sheet: Supplemental Table 6
Supplemental Table 6. The state transition of triads across water conditions
Traid	A sub-genome	B sub-genome	D sub-genome		Shoot						Root
					DEG	WW	DS1	DS2	Class		DEG	WW	DS1	DS2	Class
Traid15	TraesCS5A02G246200	TraesCS5B02G243500	TraesCS5D02G252700		DEG	Asuppressed	Asuppressed	Asuppressed	stable		-	Bsuppressed	Bsuppressed	Bsuppressed	stable
Traid27	TraesCS2A02G313400	TraesCS2B02G332200	TraesCS2D02G311900		DEG	Balanced	Balanced	Balanced	stable		DEG	Balanced	Balanced	Balanced	stable
Traid28	TraesCS2A02G266900	TraesCS2B02G275500	TraesCS2D02G257100		DEG	Balanced	Balanced	Balanced	stable		DEG	Balanced	Balanced	Balanced	stable
Traid39	TraesCS2A02G460600	TraesCS2B02G482300	TraesCS2D02G460800		DEG	Balanced	Balanced	Balanced	stable		DEG	Adomint	Adomint	Adomint	stable
Traid46	TraesCS5A02G187500	TraesCS5B02G196300	TraesCS5D02G203500		DEG	Dsuppressed	Balanced	Dsuppressed	switch		DEG	Dsuppressed	Dsuppressed	Dsuppressed	stable
Traid59	TraesCS1A02G247500	TraesCS1B02G258100	TraesCS1D02G246700		DEG	Dsuppressed	Dsuppressed	Dsuppressed	stable		DEG	-	-	-	-
Traid74	TraesCS3A02G175400	TraesCS3B02G205100	TraesCS3D02G180800		DEG	Bdomint	Bdomint	Bdomint	stable		-	Bdomint	Bdomint	Bdomint	stable
Traid79	TraesCS6A02G237200	TraesCS6B02G265700	TraesCS6D02G219800		DEG	Asuppressed	Balanced	Balanced	switch		DEG	Asuppressed	Balanced	Asuppressed	switch
Traid88	TraesCS3A02G353100	TraesCS3B02G385800	TraesCS3D02G347200		DEG	Dsuppressed	Adomint	Dsuppressed	switch		-	Adomint	Adomint	Adomint	stable
Traid116	TraesCS1A02G051700	TraesCS1B02G068500	TraesCS1D02G053700		DEG	Balanced	Balanced	Balanced	stable		DEG	Balanced	Balanced	Balanced	stable
Traid118	TraesCS2A02G301400	TraesCS2B02G317500	TraesCS2D02G300000		DEG	Bsuppressed	Bsuppressed	Bsuppressed	stable		-	-	-	-	-
Traid124	TraesCS5A02G540700	TraesCS4B02G373500	TraesCS4D02G363800		DEG	Balanced	Balanced	Balanced	stable		DEG	Balanced	Balanced	Balanced	stable
Traid130	TraesCS3A02G352300	TraesCS3B02G384900	TraesCS3D02G346300		DEG	Asuppressed	Asuppressed	Asuppressed	stable		-	-	-	-	-
Traid131	TraesCS7A02G385000	TraesCS7B02G288000	TraesCS7D02G381600		DEG	Balanced	Balanced	Balanced	stable		DEG	-	-	-	-
Traid136	TraesCS3A02G104100	TraesCS3B02G122500	TraesCS3D02G106300		DEG	Bsuppressed	Bsuppressed	Bsuppressed	stable		DEG	-	-	-	-
Traid152	TraesCS6A02G215300	TraesCS6B02G244900	TraesCS6D02G197600		DEG	Bsuppressed	Bsuppressed	Bsuppressed	stable		DEG	Bsuppressed	Bsuppressed	Bsuppressed	stable
Traid156	TraesCS3A02G397300	TraesCS3B02G429200	TraesCS3D02G391100		DEG	Balanced	Bsuppressed	Bsuppressed	switch		DEG	Balanced	Bsuppressed	Bsuppressed	switch
Traid165	TraesCS7A02G366900	TraesCS7B02G261100	TraesCS7D02G355900		DEG	Bdomint	Bdomint	Bdomint	stable		DEG	Dsuppressed	Dsuppressed	Dsuppressed	stable
Traid174	TraesCS1A02G220000	TraesCS1B02G233300	TraesCS1D02G221500		DEG	Dsuppressed	Dsuppressed	Dsuppressed	stable		-	Balanced	Balanced	Balanced	stable
Traid192	TraesCS6A02G241700	TraesCS6B02G282700	TraesCS6D02G223700		DEG	Bsuppressed	Bsuppressed	Bsuppressed	stable		DEG	Bsuppressed	Bsuppressed	Bsuppressed	stable
Traid195	TraesCS3A02G180700	TraesCS3B02G210400	TraesCS3D02G185600		DEG	Balanced	Balanced	Balanced	stable		DEG	Balanced	Balanced	Balanced	stable
Traid205	TraesCS2A02G443400	TraesCS2B02G464500	TraesCS2D02G442600		DEG	Balanced	Balanced	Balanced	stable		-	Balanced	Balanced	Balanced	stable
Traid208	TraesCS3A02G011600	TraesCS3B02G014600	TraesCS3D02G000100		DEG	Dsuppressed	Balanced	Dsuppressed	switch		-	-	-	-	-
Traid235	TraesCS1A02G179400	TraesCS1B02G201100	TraesCS1D02G177700		DEG	Balanced	Balanced	Balanced	stable		-	Balanced	Balanced	Balanced	stable
Traid238	TraesCS7A02G416400	TraesCS7B02G316600	TraesCS7D02G409700		DEG	Balanced	Balanced	Balanced	stable		DEG	Balanced	Balanced	Balanced	stable
Traid248	TraesCS1A02G093300	TraesCS1B02G121600	TraesCS1D02G101900		DEG	Asuppressed	Asuppressed	Asuppressed	stable		-	Asuppressed	Asuppressed	Asuppressed	stable
Traid254	TraesCS5A02G503800	TraesCS4B02G332700	TraesCS4D02G329400		DEG	Balanced	Balanced	Balanced	stable		DEG	Balanced	Balanced	Balanced	stable
Traid271	TraesCS2A02G461200	TraesCS2B02G483000	TraesCS2D02G461400		DEG	Dsuppressed	Dsuppressed	Dsuppressed	stable		DEG	Balanced	Balanced	Balanced	stable
Traid282	TraesCS4A02G316400	TraesCS5B02G562700	TraesCS5D02G566700		DEG	Balanced	Balanced	Balanced	stable		-	-	-	-	-
Traid289	TraesCS3A02G388500	TraesCS3B02G420300	TraesCS3D02G381100		DEG	Adomint	Adomint	Adomint	stable		DEG	Dsuppressed	Dsuppressed	Dsuppressed	stable
Traid294	TraesCS4A02G081600	TraesCS4B02G222200	TraesCS4D02G222700		DEG	Balanced	Dsuppressed	Dsuppressed	switch		-	Balanced	Balanced	Balanced	stable
Traid306	TraesCS6A02G277300	TraesCS6B02G305300	TraesCS6D02G257900		DEG	Balanced	Balanced	Balanced	stable		DEG	Balanced	Balanced	Balanced	stable
Traid317	TraesCS2A02G275900	TraesCS2B02G293600	TraesCS2D02G274900		DEG	Asuppressed	Asuppressed	Asuppressed	stable		DEG	Asuppressed	Asuppressed	Asuppressed	stable
Traid320	TraesCS4A02G194400	TraesCS4B02G120900	TraesCS4D02G118900		DEG	Balanced	Balanced	Balanced	stable		-	-	-	-	-
Traid326	TraesCS5A02G064500	TraesCS5B02G068200	TraesCS5D02G075300		DEG	Bsuppressed	Bsuppressed	Balanced	switch		DEG	Balanced	Balanced	Balanced	stable
Traid332	TraesCS3A02G347100	TraesCS3B02G378800	TraesCS3D02G340700		DEG	Balanced	Balanced	Balanced	stable		DEG	Balanced	Balanced	Balanced	stable
Traid334	TraesCS6A02G368800	TraesCS6B02G404800	TraesCS6D02G352300		DEG	Asuppressed	Asuppressed	Asuppressed	stable		DEG	Balanced	Balanced	Balanced	stable
Traid353	TraesCS4A02G010400	TraesCS4B02G294000	TraesCS4D02G292800		DEG	Balanced	Balanced	Balanced	stable		-	-	-	-	-
Traid361	TraesCS4A02G312100	TraesCS4B02G000800	TraesCS4D02G002100		DEG	Balanced	Balanced	Balanced	stable		DEG	Balanced	Balanced	Balanced	stable
Traid370	TraesCS1A02G157900	TraesCS1B02G174100	TraesCS1D02G155400		DEG	Balanced	Balanced	Balanced	stable		DEG	Balanced	Balanced	Balanced	stable
Traid373	TraesCS2A02G436300	TraesCS2B02G456900	TraesCS2D02G433600		DEG	Balanced	Balanced	Balanced	stable		-	Balanced	Balanced	Balanced	stable
Traid374	TraesCS2A02G542900	TraesCS2B02G572700	TraesCS2D02G544100		DEG	Balanced	Balanced	Balanced	stable		DEG	Balanced	Balanced	Balanced	stable
Traid375	TraesCS2A02G379600	TraesCS2B02G396500	TraesCS2D02G375800		DEG	Balanced	Balanced	Balanced	stable		DEG	Dsuppressed	Dsuppressed	Dsuppressed	stable
Traid376	TraesCS2A02G286900	TraesCS2B02G303900	TraesCS2D02G285500		DEG	Balanced	Balanced	Balanced	stable		-	-	-	-	-
Traid380	TraesCS2A02G321500	TraesCS2B02G361000	TraesCS2D02G342000		DEG	Balanced	Balanced	Balanced	stable		-	Balanced	Balanced	Balanced	stable
Traid400	TraesCS4A02G312200	TraesCS4B02G000900	TraesCS4D02G002000		DEG	Balanced	Balanced	Balanced	stable		DEG	Asuppressed	Asuppressed	Asuppressed	stable
Traid403	TraesCS2A02G263800	TraesCS2B02G278400	TraesCS2D02G260200		DEG	Asuppressed	Asuppressed	Asuppressed	stable		DEG	Asuppressed	Asuppressed	Asuppressed	stable
Traid416	TraesCS5A02G468800	TraesCS5B02G481300	TraesCS5D02G481700		DEG	Balanced	Balanced	Balanced	stable		DEG	Balanced	Balanced	Balanced	stable
Traid434	TraesCS1A02G065400	TraesCS1B02G083500	TraesCS1D02G066100		DEG	Balanced	Balanced	Balanced	stable		DEG	Balanced	Balanced	Balanced	stable
Traid438	TraesCS5A02G166100	TraesCS5B02G163500	TraesCS5D02G170700		DEG	Balanced	Balanced	Balanced	stable		-	-	-	-	-
Traid458	TraesCS3A02G291000	TraesCS3B02G325700	TraesCS3D02G290800		DEG	Balanced	Balanced	Balanced	stable		DEG	Balanced	Balanced	Balanced	stable
Traid460	TraesCS3A02G282200	TraesCS3B02G315900	TraesCS3D02G282200		DEG	Balanced	Balanced	Balanced	stable		-	Balanced	Balanced	Balanced	stable
Traid465	TraesCS1A02G362100	TraesCS1B02G379300	TraesCS1D02G367000		DEG	Balanced	Balanced	Balanced	stable		DEG	Bsuppressed	Bsuppressed	Bsuppressed	stable
Traid466	TraesCS7A02G460000	TraesCS7B02G360800	TraesCS7D02G448000		DEG	Asuppressed	Asuppressed	Asuppressed	stable		-	-	-	-	-
Traid471	TraesCS6A02G255600	TraesCS6B02G270000	TraesCS6D02G236800		DEG	Bsuppressed	Bsuppressed	Bsuppressed	stable		DEG	Bsuppressed	Bsuppressed	Bsuppressed	stable
Traid484	TraesCS2A02G287800	TraesCS2B02G304500	TraesCS2D02G286100		DEG	Balanced	Balanced	Balanced	stable		DEG	Balanced	Balanced	Balanced	stable
Traid490	TraesCS7A02G189800	TraesCS7B02G094700	TraesCS7D02G190900		DEG	Ddomint	Ddomint	Ddomint	stable		DEG	-	-	-	-
Traid511	TraesCS4A02G239100	TraesCS4B02G075900	TraesCS4D02G074500		DEG	Balanced	Balanced	Balanced	stable		-	-	-	-	-
Traid521	TraesCS2A02G374700	TraesCS2B02G391700	TraesCS2D02G371100		DEG	Balanced	Balanced	Balanced	stable		-	Balanced	Balanced	Balanced	stable
Traid523	TraesCS2A02G159100	TraesCS2B02G184700	TraesCS2D02G166200		DEG	Bsuppressed	Bsuppressed	Bsuppressed	stable		DEG	Balanced	Balanced	Balanced	stable
Traid535	TraesCS4A02G270400	TraesCS4B02G043700	TraesCS4D02G041200		DEG	Asuppressed	Asuppressed	Asuppressed	stable		-	-	-	-	-
Traid536	TraesCS2A02G551600	TraesCS2B02G582800	TraesCS2D02G552700		DEG	Asuppressed	Asuppressed	Asuppressed	stable		DEG	Asuppressed	Asuppressed	Asuppressed	stable
Traid590	TraesCS6A02G357500	TraesCS6B02G389500	TraesCS6D02G339500		DEG	Balanced	Balanced	Asuppressed	switch		DEG	Asuppressed	Asuppressed	Asuppressed	stable
Traid595	TraesCS2A02G374500	TraesCS2B02G391500	TraesCS2D02G370900		DEG	Balanced	Balanced	Balanced	stable		-	Balanced	Balanced	Balanced	stable
Traid603	TraesCS3A02G343300	TraesCS3B02G375500	TraesCS3D02G337200		DEG	Balanced	Balanced	Balanced	stable		-	Balanced	Balanced	Balanced	stable
Traid611	TraesCS2A02G210000	TraesCS2B02G236200	TraesCS2D02G216800		DEG	Asuppressed	Asuppressed	Asuppressed	stable		-	-	-	-	-
Traid616	TraesCS5A02G343000	TraesCS5B02G342800	TraesCS5D02G348900		DEG	Bsuppressed	Bsuppressed	Bsuppressed	stable		DEG	Bsuppressed	Bsuppressed	Bsuppressed	stable
Traid618	TraesCS4A02G108600	TraesCS4B02G196000	TraesCS4D02G196300		DEG	Balanced	Balanced	Balanced	stable		DEG	Balanced	Balanced	Balanced	stable
Traid631	TraesCS1A02G074400	TraesCS1B02G093300	TraesCS1D02G077300		DEG	Bsuppressed	Bsuppressed	Bsuppressed	stable		DEG	Balanced	Balanced	Balanced	stable
Traid632	TraesCS7A02G321600	TraesCS7B02G222500	TraesCS7D02G318600		DEG	-	-	-	-		DEG	Balanced	Bsuppressed	Balanced	switch
Traid637	TraesCS5A02G443300	TraesCS5B02G447900	TraesCS5D02G450800		DEG	Balanced	Balanced	Balanced	stable		DEG	Balanced	Balanced	Balanced	stable
Traid638	TraesCS4A02G132800	TraesCS4B02G171900	TraesCS4D02G173900		DEG	Ddomint	Ddomint	Ddomint	stable		-	-	-	-	-
Traid651	TraesCS4A02G053100	TraesCS4B02G251400	TraesCS4D02G251400		DEG	Balanced	Balanced	Balanced	stable		-	-	-	-	-
Traid657	TraesCS1A02G240200	TraesCS1B02G252300	TraesCS1D02G240300		DEG	-	-	-	-		DEG	Adomint	Adomint	Adomint	stable
Traid659	TraesCS1A02G246500	TraesCS1B02G257200	TraesCS1D02G245800		DEG	Balanced	Balanced	Balanced	stable		-	Dsuppressed	Dsuppressed	Balanced	switch
Traid661	TraesCS3A02G105700	TraesCS3B02G124200	TraesCS3D02G107900		DEG	Balanced	Balanced	Balanced	stable		DEG	Balanced	Balanced	Balanced	stable
Traid664	TraesCS5A02G484800	TraesCS5B02G498100	TraesCS5D02G498300		DEG	Bsuppressed	Bsuppressed	Bsuppressed	stable		DEG	Bsuppressed	Bsuppressed	Bsuppressed	stable
Traid668	TraesCS3A02G200600	TraesCS3B02G226200	TraesCS3D02G203300		DEG	Asuppressed	Balanced	Balanced	switch		-	Asuppressed	Asuppressed	Asuppressed	stable
Traid672	TraesCS4A02G071700	TraesCS4B02G227600	TraesCS4D02G228500		DEG	Balanced	Balanced	Balanced	stable		DEG	Balanced	Balanced	Balanced	stable
Traid684	TraesCS7A02G312300	TraesCS7B02G212000	TraesCS7D02G308700		DEG	Bsuppressed	Bsuppressed	Bsuppressed	stable		DEG	Balanced	Balanced	Balanced	stable
Traid696	TraesCS7A02G126900	TraesCS7B02G026300	TraesCS7D02G124700		DEG	Ddomint	Ddomint	Ddomint	stable		DEG	Bsuppressed	Balanced	Balanced	switch
Traid698	TraesCS7A02G307300	TraesCS7B02G207600	TraesCS7D02G304100		DEG	Balanced	Balanced	Balanced	stable		DEG	Bsuppressed	Bsuppressed	Balanced	switch
Traid702	TraesCS5A02G195800	TraesCS5B02G187600	TraesCS5D02G195200		DEG	Asuppressed	Balanced	Asuppressed	switch		-	Balanced	Balanced	Balanced	stable
Traid705	TraesCS3A02G048000	TraesCS3B02G034100	TraesCS3D02G031400		DEG	Balanced	Balanced	Balanced	stable		DEG	Balanced	Balanced	Balanced	stable
Traid706	TraesCS1A02G072600	TraesCS1B02G091500	TraesCS1D02G075500		DEG	Bsuppressed	Bsuppressed	Bsuppressed	stable		DEG	Bsuppressed	Bsuppressed	Bsuppressed	stable
Traid708	TraesCS6A02G252000	TraesCS6B02G273500	TraesCS6D02G233500		DEG	Balanced	Asuppressed	Asuppressed	switch		-	-	-	-	-
Traid712	TraesCS2A02G583900	TraesCS2B02G602700	TraesCS2D02G595900		DEG	Dsuppressed	Dsuppressed	Dsuppressed	stable		DEG	Adomint	Adomint	Adomint	stable
Traid729	TraesCS4A02G262200	TraesCS4B02G052600	TraesCS4D02G052800		DEG	Balanced	Balanced	Balanced	stable		DEG	Asuppressed	Asuppressed	Asuppressed	stable
Traid736	TraesCS4A02G224300	TraesCS4B02G091800	TraesCS4D02G088800		DEG	Asuppressed	Asuppressed	Asuppressed	stable		DEG	Asuppressed	Asuppressed	Asuppressed	stable
Traid737	TraesCS3A02G402700	TraesCS3B02G436300	TraesCS3D02G397700		DEG	Bsuppressed	Bsuppressed	Bsuppressed	stable		DEG	Balanced	Balanced	Balanced	stable
Traid742	TraesCS3A02G158800	TraesCS3B02G189800	TraesCS3D02G166500		DEG	Adomint	Adomint	Adomint	stable		-	-	-	-	-
Traid743	TraesCS1A02G260700	TraesCS1B02G271300	TraesCS1D02G260700		DEG	-	-	-	-		-	Bsuppressed	Bsuppressed	Bsuppressed	stable
Traid760	TraesCS2A02G218500	TraesCS2B02G243900	TraesCS2D02G224900		DEG	Balanced	Balanced	Balanced	stable		-	Balanced	Balanced	Balanced	stable
Traid772	TraesCS1A02G159200	TraesCS1B02G175600	TraesCS1D02G156600		DEG	-	-	-	-		DEG	Asuppressed	Asuppressed	Asuppressed	stable
Traid783	TraesCS6A02G417300	TraesCS6B02G472100	TraesCS6D02G402600		DEG	Balanced	Balanced	Balanced	stable		-	Balanced	Balanced	Balanced	stable
Traid786	TraesCS3A02G432400	TraesCS3B02G468300	TraesCS3D02G425600		DEG	Balanced	Balanced	Balanced	stable		-	Balanced	Balanced	Balanced	stable
Traid787	TraesCS6A02G027900	TraesCS6B02G039500	TraesCS6D02G031100		DEG	Balanced	Balanced	Balanced	stable		-	-	-	-	-
Traid797	TraesCS6A02G302500	TraesCS6B02G331700	TraesCS6D02G282000		DEG	Balanced	Balanced	Balanced	stable		-	-	-	-	-
Traid800	TraesCS4A02G299000	TraesCS4B02G014400	TraesCS4D02G012600		DEG	Asuppressed	Asuppressed	Asuppressed	stable		DEG	Balanced	Balanced	Balanced	stable
Traid807	TraesCS7A02G443500	TraesCS7B02G342300	TraesCS7D02G432700		DEG	Balanced	Asuppressed	Balanced	switch		DEG	Balanced	Balanced	Balanced	stable
Traid810	TraesCS5A02G503900	TraesCS4B02G332800	TraesCS4D02G329500		DEG	Balanced	Balanced	Balanced	stable		DEG	Bdomint	Bdomint	Bdomint	stable
Traid819	TraesCS4A02G128500	TraesCS4B02G176300	TraesCS4D02G178100		DEG	Balanced	Balanced	Balanced	stable		DEG	Balanced	Balanced	Balanced	stable
Traid828	TraesCS4A02G214000	TraesCS4B02G102300	TraesCS4D02G099000		DEG	-	-	-	-		-	Ddomint	Ddomint	Ddomint	stable
Traid834	TraesCS7A02G456600	TraesCS7B02G357300	TraesCS7D02G445300		DEG	Asuppressed	Asuppressed	Asuppressed	stable		-	-	-	-	-
Traid839	TraesCS7A02G205300	TraesCS7B02G112700	TraesCS7D02G208200		DEG	Balanced	Balanced	Balanced	stable		DEG	Balanced	Balanced	Balanced	stable
Traid840	TraesCS4A02G042100	TraesCS4B02G262900	TraesCS4D02G263000		DEG	Dsuppressed	Dsuppressed	Dsuppressed	stable		DEG	Dsuppressed	Dsuppressed	Dsuppressed	stable
Traid842	TraesCS7A02G257000	TraesCS7B02G153200	TraesCS7D02G257400		DEG	Balanced	Balanced	Balanced	stable		DEG	Balanced	Balanced	Balanced	stable
Traid847	TraesCS5A02G379800	TraesCS5B02G383400	TraesCS5D02G389300		DEG	Adomint	Adomint	Adomint	stable		-	-	-	-	-
Traid857	TraesCS3A02G374100	TraesCS3B02G406300	TraesCS3D02G366800		DEG	Asuppressed	Asuppressed	Asuppressed	stable		-	Asuppressed	Asuppressed	Balanced	switch
Traid868	TraesCS5A02G460600	TraesCS5B02G470400	TraesCS5D02G472300		DEG	Bsuppressed	Bsuppressed	Bsuppressed	stable		DEG	Balanced	Bsuppressed	Bsuppressed	switch
Traid870	TraesCS3A02G001500	TraesCS3B02G000400	TraesCS3D02G010000		DEG	Balanced	Balanced	Balanced	stable		-	Dsuppressed	Balanced	Dsuppressed	switch
Traid879	TraesCS1A02G119800	TraesCS1B02G139200	TraesCS1D02G120700		DEG	Bsuppressed	Bsuppressed	Bsuppressed	stable		-	Bsuppressed	Bsuppressed	Bsuppressed	stable
Traid882	TraesCS3A02G488700	TraesCS3B02G536600	TraesCS3D02G484600		DEG	Balanced	Balanced	Balanced	stable		DEG	Balanced	Balanced	Balanced	stable
Traid890	TraesCS4A02G007900	TraesCS4B02G297000	TraesCS4D02G295900		DEG	Bsuppressed	Ddomint	Balanced	switch		DEG	Balanced	Balanced	Balanced	stable
Traid892	TraesCS4A02G262100	TraesCS4B02G052800	TraesCS4D02G053000		DEG	Balanced	Balanced	Balanced	stable		-	Balanced	Balanced	Balanced	stable
Traid911	TraesCS3A02G376800	TraesCS3B02G409300	TraesCS3D02G369800		DEG	Balanced	Balanced	Balanced	stable		DEG	Balanced	Balanced	Balanced	stable
Traid923	TraesCS7A02G363100	TraesCS7B02G264800	TraesCS7D02G359900		DEG	Balanced	Balanced	Balanced	stable		-	-	-	-	-
Traid928	TraesCS4A02G135400	TraesCS4B02G169800	TraesCS4D02G171900		DEG	Balanced	Balanced	Balanced	stable		-	-	-	-	-
Traid940	TraesCS5A02G178400	TraesCS5B02G176100	TraesCS5D02G182900		DEG	Balanced	Balanced	Balanced	stable		DEG	Bsuppressed	Bsuppressed	Bsuppressed	stable
Traid950	TraesCS2A02G450500	TraesCS2B02G472100	TraesCS2D02G450100		DEG	Balanced	Balanced	Balanced	stable		DEG	Balanced	Balanced	Balanced	stable
Traid954	TraesCS7A02G160200	TraesCS7B02G065100	TraesCS7D02G160900		DEG	Balanced	Balanced	Balanced	stable		DEG	Balanced	Balanced	Balanced	stable
Traid956	TraesCS4A02G293800	TraesCS4B02G019700	TraesCS4D02G018000		DEG	Dsuppressed	Dsuppressed	Dsuppressed	stable		DEG	Dsuppressed	Dsuppressed	Dsuppressed	stable
Traid968	TraesCS6A02G178600	TraesCS6B02G206000	TraesCS6D02G166000		DEG	Bdomint	Dsuppressed	Dsuppressed	switch		DEG	-	-	-	-
Traid971	TraesCS4A02G005200	TraesCS4B02G299800	TraesCS4D02G298700		DEG	Balanced	Balanced	Balanced	stable		DEG	Balanced	Balanced	Balanced	stable
Traid975	TraesCS3A02G278300	TraesCS3B02G312500	TraesCS3D02G278600		DEG	Balanced	Balanced	Balanced	stable		DEG	Balanced	Balanced	Balanced	stable
Traid976	TraesCS3A02G166100	TraesCS3B02G199800	TraesCS3D02G175600		DEG	Balanced	Asuppressed	Asuppressed	switch		DEG	Asuppressed	Asuppressed	Asuppressed	stable
Traid984	TraesCS1A02G107500	TraesCS1B02G129500	TraesCS1D02G111600		DEG	Bsuppressed	Bsuppressed	Bsuppressed	stable		-	-	-	-	-
Traid987	TraesCS4A02G405900	TraesCS4B02G305400	TraesCS4D02G303600		DEG	Bdomint	Bdomint	Bdomint	stable		DEG	Bdomint	Bdomint	Bdomint	stable
Traid993	TraesCS3A02G308600	TraesCS3B02G151600	TraesCS3D02G133900		DEG	Balanced	Balanced	Balanced	stable		DEG	Bsuppressed	Bsuppressed	Bsuppressed	stable
Traid995	TraesCS5A02G095800	TraesCS5B02G101700	TraesCS5D02G108400		DEG	Balanced	Balanced	Balanced	stable		-	Balanced	Balanced	Balanced	stable
Traid1001	TraesCS5A02G357200	TraesCS5B02G359700	TraesCS5D02G366300		DEG	Balanced	Balanced	Balanced	stable		DEG	Balanced	Balanced	Balanced	stable
Traid1004	TraesCS6A02G322000	TraesCS6B02G352800	TraesCS6D02G301800		DEG	Bsuppressed	Bsuppressed	Bsuppressed	stable		DEG	Balanced	Balanced	Balanced	stable
Traid1005	TraesCS1A02G137300	TraesCS1B02G155800	TraesCS1D02G138200		DEG	Balanced	Balanced	Balanced	stable		-	Balanced	Balanced	Balanced	stable
Traid1007	TraesCS5A02G093100	TraesCS5B02G099200	TraesCS5D02G105400		DEG	Adomint	Adomint	Adomint	stable		DEG	Adomint	Adomint	Adomint	stable
Traid1008	TraesCS2A02G395100	TraesCS2B02G413200	TraesCS2D02G392500		DEG	Balanced	Balanced	Balanced	stable		DEG	Asuppressed	Asuppressed	Asuppressed	stable
Traid1020	TraesCS3A02G204800	TraesCS3B02G236900	TraesCS3D02G210600		DEG	Balanced	Balanced	Balanced	stable		-	Balanced	Balanced	Balanced	stable
[truncated: 8,003 more rows]

## Sheet: Supplemental Table 7
Supplemental Table 7. Identification and classification of eQTLs in each environment
[truncated: 146,967 more rows]

[truncated: 8 more sheets: Supplemental Table 8, Supplemental Table 9, Supplemental Table 10, Supplemental Table 11, Supplemental Table 12, Supplemental Table 13, Supplemental Table 14, Supplemental Table 15]
